# Supplementary material for: Radical-mediated vicinal addition of alkoxysulfonyl/fluorosulfonyl and trifluoromethyl groups to aryl alkyl alkynes
Source: Royal Society of Chemistry journal article supplement (doi:10.1039/d1sc03315h), 2021-01-01

# Supporting Information

## Radical-Mediated Vicinal Addition of Alkoxy- sulfonyl/Fluorosulfonyl and Trifluoromethyl Groups to Aryl Alkyl Alkynes

Xinrui Dong,<sup>†a</sup> Wenhua Jiang,<sup>†a</sup> Dexiang Hua,<sup>a</sup> Xiaohui Wang,<sup>a</sup> Liang Xu<sup>\*b</sup> & Xiaoxing Wu<sup>\*a</sup>

<sup>a</sup> State Key Laboratory of Natural Medicines and Department of Medicinal Chemistry, School of Pharmacy, China Pharmaceutical University, Nanjing 211198, Jiangsu

<sup>b</sup> School of Chemistry and Chemical Engineering/Key Laboratory for Green Processing of Chemical Engineering of Xinjiang Bingtuan, Shihezi University, Shihezi 832003, Xinjiang

\*Corresponding Authors: Liang Xu: xuliang4423@shzu.edu.cn; Xiaoxing Wu: wu\_xiaoxing@cpu.edu.cn; <sup>†</sup>X.D. and W.J. contributed equally to this work.

### Table of Contents

|       |                                                                              |      |
|-------|------------------------------------------------------------------------------|------|
| I.    | General considerations .....                                                 | S2   |
| II.   | Synthesis and characterization of substrates .....                           | S3   |
| III.  | Screening of reaction conditions .....                                       | S26  |
| IV.   | Synthesis and characterization of products .....                             | S28  |
| V.    | Additional substrates explored .....                                         | S75  |
| VI.   | Single crystal X-ray data .....                                              | S76  |
| VII.  | Mechanistic studies .....                                                    | S80  |
| VIII. | Computational studies .....                                                  | S84  |
| IX.   | Copies of <sup>1</sup> H, <sup>13</sup> C, <sup>19</sup> F NMR spectra ..... | S128 |

## I. General considerations

**Reagents.** Unless otherwise indicated, all reactions were carried out in screw-cap test tube under an argon atmosphere with dry solvents. THF was dried and purified by distillation from sodium/benzophenone. CH<sub>3</sub>CN, MeOH, and CH<sub>2</sub>Cl<sub>2</sub> were distilled from CaH<sub>2</sub>. Acetone was dried and distilled from anhydrous K<sub>2</sub>CO<sub>3</sub>. bpyCu(CF<sub>3</sub>)<sub>3</sub> was purchased from Shanghai Kecui Industrial Co., Ltd. and used as received. All other reagents were purchased from commercial sources and used as received.

**Analytical methods.** All new compounds were characterized by <sup>1</sup>H NMR, <sup>13</sup>C NMR, <sup>19</sup>F NMR (where applicable), and HRMS. NMR spectra were recorded on a Bruker Advance 300, 400, 500, or 600 MHz spectrometer in CDCl<sub>3</sub>. All <sup>1</sup>H NMR spectra are reported in ppm downfield from tetramethylsilane (0 ppm). All <sup>13</sup>C NMR spectra are reported in ppm relative to residual CHCl<sub>3</sub> (77.0 ppm). All <sup>19</sup>F NMR spectra are reported in ppm relative to a CFCI<sub>3</sub> external standard (0 ppm). Coupling constants are reported in Hz with multiplicities denoted as s (singlet), d (doublet), t (triplet), q (quartet), m (multiplet), and brs (broad singlet). Reactions were monitored by thin-layer chromatography (TLC) carried out on commercial silica gel plates (GF254) under UV light. Flash chromatography was performed on silica gel 60 (200-300 mesh). High resolution mass spectra (HRMS) were obtained on an Agilent 6540 Ultra-High-Definition (UHD) Accurate-Mass Quadrupole Time-of-Flight (Q-TOF) spectrometer using the ESI technique and an Agilent 7250&JEOL-JMS-T100LP AccuTOF spectrometer using the EI technique.

## II. Synthesis and characterization of substrates

### 1. Commercially-available alkynes

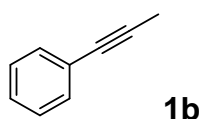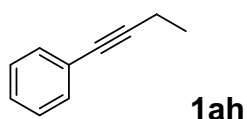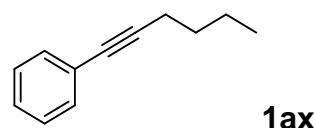

### 2. Synthesis and characterization of alkynes

#### 2.1 Procedures and characterization of alkyne substrates

##### 2.1.1 General procedure A

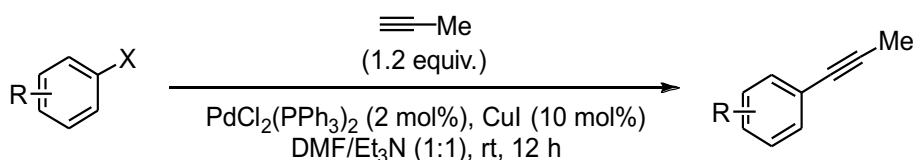

An oven-dried round bottom flask, which was equipped with a magnetic stir bar and charged with aryl halide (5.0 mmol, 1.0 equiv., if it is a solid),  $\text{PdCl}_2(\text{PPh}_3)_2$  (70.2 mg, 2 mol%), and  $\text{CuI}$  (95.2 mg, 10 mol%), was evacuated and backfilled with argon. The aryl halide (5.0 mmol, 1.0 equiv., if it is a liquid),  $\text{Et}_3\text{N}$  (6 mL), and propyne (1.0 M in DMF, 6 mL, 6.0 mmol) were added through the septum via syringe at room temperature. The reaction was stirred at room temperature for 12 h. Saturated aqueous  $\text{NH}_4\text{Cl}$  (15 mL) and  $\text{EtOAc}$  (20 mL) were added. The two layers were separated and the aqueous layer was extracted with  $\text{EtOAc}$  (3 × 15 mL). The combined organic layers were washed with water (3 × 10 mL) and brine, dried over  $\text{Na}_2\text{SO}_4$ , and concentrated. The crude material was purified by flash chromatography on silica gel (petroleum ether/ $\text{EtOAc}$ ) to afford the title product.

##### 2.1.2 General procedure B

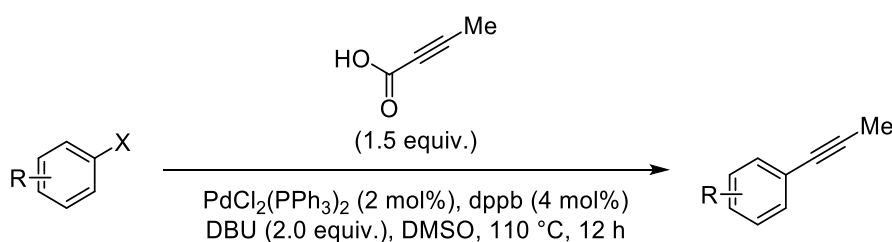

An oven-dried round bottom flask, which was equipped with a magnetic stir bar and charged with aryl halide (5.0 mmol, 1.0 equiv., if it is a solid), PdCl<sub>2</sub>(PPh<sub>3</sub>)<sub>2</sub> (70.2 mg, 2 mol%), 1,4-bis(diphenyl-phosphino)butane (dppb, 85.3 mg, 4 mol%), and but-2-ynoic acid (0.63 g, 7.5 mmol), was evacuated and backfilled with argon. The aryl halide (5.0 mmol, 1.0 equiv., if it is a liquid), DMSO (10 mL), and DBU (1.49 mL, 10.0 mmol) were added through the septum via syringe at room temperature. The reaction was stirred at 110 °C for 12 h. Saturated aqueous NH<sub>4</sub>Cl (15 mL) and EtOAc (20 mL) were added. The two layers were separated and the aqueous layer was extracted with EtOAc (3 × 15 mL). The combined organic layers were washed with water (3 × 10 mL) and brine, dried over Na<sub>2</sub>SO<sub>4</sub>, and concentrated. The crude material was purified flash chromatography on silica gel (petroleum ether/EtOAc) to afford the title product.

### 2.1.3 General procedure C

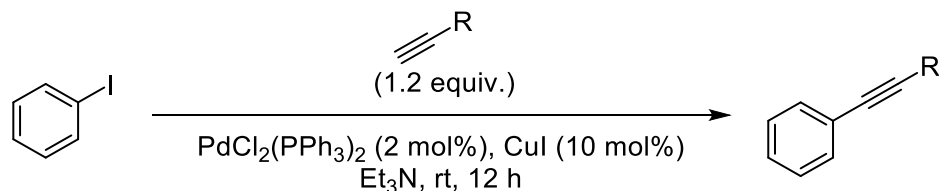

An oven-dried round bottom flask, which was equipped with a magnetic stir bar and charged with PdCl<sub>2</sub>(PPh<sub>3</sub>)<sub>2</sub> (70.2 mg, 2 mol%) and CuI (95.2 mg, 10 mol%), was evacuated and backfilled with argon. Iodobenzene (0.56 mL, 5.0 mmol, 1.0 equiv.), substituted alkyne (6.0 mmol), and Et<sub>3</sub>N (10 mL) were added through the septum via syringe at room temperature. The reaction was stirred at room temperature for 12 h. Saturated aqueous NH<sub>4</sub>Cl (15 mL) and EtOAc (20 mL) were added. The two layers were separated and the aqueous layer was extracted with EtOAc (2 × 15 mL). The combined organic layers were washed with brine, dried over Na<sub>2</sub>SO<sub>4</sub>, and concentrated. The crude material was purified by flash chromatography on silica gel (petroleum ether/EtOAc) to afford the title product.



**Table S1. Synthesis of Starting Alkyl Arylalkynes**

| Aryl halide or alkyne                                                               | Alkyne product                                                                            | General procedure | Analytical reference                                      |
|-------------------------------------------------------------------------------------|-------------------------------------------------------------------------------------------|-------------------|-----------------------------------------------------------|
| 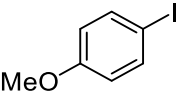   | <br>1a   | A                 | <i>J. Am. Chem. Soc.</i> <b>2018</b> , <i>140</i> , 6006. |
|    | <br>1c   | A                 | <i>J. Am. Chem. Soc.</i> <b>2018</b> , <i>140</i> , 6006. |
|    | <br>1d   | A                 | <i>Org. Lett.</i> <b>2018</b> , <i>20</i> , 1576.         |
|   | <br>1e  | A                 | <i>J. Am. Chem. Soc.</i> <b>2010</b> , <i>132</i> , 4101. |
|  | <br>1f | A                 | <i>Chem. Commun.</i> <b>2019</b> , <i>55</i> , 9547.      |
|  | <br>1g | A                 | See details in below                                      |
|  | <br>1h | B                 | <i>Org. Biomol. Chem.</i> <b>2012</b> , <i>10</i> , 7483. |
|  | <br>1i | A                 | <i>Org. Lett.</i> <b>2018</b> , <i>20</i> , 1693.         |
|  | <br>1j | A                 | <i>Org. Lett.</i> <b>2017</b> , <i>19</i> , 1962.         |

| Aryl halide or alkyne                                                               | Alkyne product                                                                                | General procedure | Analytical reference                                         |
|-------------------------------------------------------------------------------------|-----------------------------------------------------------------------------------------------|-------------------|--------------------------------------------------------------|
| 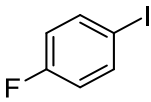   |  <b>1k</b>   | A                 | <i>J. Am. Chem. Soc.</i> <b>2018</b> , <i>140</i> , 7267.    |
|    |  <b>1l</b>   | A                 | <i>J. Am. Chem. Soc.</i> <b>2018</b> , <i>140</i> , 6006.    |
|    |  <b>1m</b>   | A                 | <i>J. Am. Chem. Soc.</i> <b>2018</b> , <i>140</i> , 6006.    |
|    |  <b>1n</b>   | A                 | See details in below                                         |
|   |  <b>1o</b>  | A                 | <i>Org. Lett.</i> <b>2018</b> , <i>20</i> , 1576.            |
|  |  <b>1p</b> | A                 | <i>Angew. Chem. Int. Ed.</i> <b>2016</b> , <i>55</i> , 5824. |
|  |  <b>1q</b> | A                 | <i>J. Am. Chem. Soc.</i> <b>2004</b> , <i>126</i> , 329.     |
|  |  <b>1r</b> | A                 | <i>J. Am. Chem. Soc.</i> <b>2004</b> , <i>126</i> , 329.     |
|  |  <b>1t</b> | A                 | See details in below                                         |

| Aryl halide or alkyne                                                               | Alkyne product                                                                                    | General procedure | Analytical reference                              |
|-------------------------------------------------------------------------------------|---------------------------------------------------------------------------------------------------|-------------------|---------------------------------------------------|
| 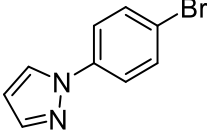   | <br><b>1u</b>    | B                 | See details in below                              |
|    | <br><b>1w</b>    | A                 | <i>Catal. Commun.</i> <b>2020</b> , 133, 105835.  |
|    | <br><b>1x</b>    | A                 | <i>Catal. Commun.</i> <b>2020</b> , 133, 105835.  |
|    | <br><b>1y</b>    | A                 | See details in below                              |
|  | <br><b>1aa</b> | A                 | <i>Catal. Commun.</i> <b>2020</b> , 133, 105835.  |
|  | <br><b>1ab</b> | B                 | <i>J. Am. Chem. Soc.</i> <b>2018</b> , 140, 6006. |
|  | <br><b>1ac</b> | B                 | See details in below                              |
|  | <br><b>1ad</b> | A                 | <i>J. Am. Chem. Soc.</i> <b>2004</b> , 126, 329.  |
|  | <br><b>1ae</b> | A                 | <i>Org. Biomol. Chem.</i> <b>2017</b> , 15, 5756. |
|  | <br><b>1af</b> | B                 | See details in below                              |

| Aryl halide or alkyne                                                               | Alkyne product                                                                                    | General procedure | Analytical reference                                          |
|-------------------------------------------------------------------------------------|---------------------------------------------------------------------------------------------------|-------------------|---------------------------------------------------------------|
| 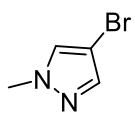   | <br><b>1ag</b>   | B                 | See details in below                                          |
|    | <br><b>1ai</b>   | C                 | <i>J. Am. Chem. Soc.</i> <b>2020</b> , <i>142</i> , 7328.     |
|    | <br><b>1aj</b>   | C                 | <i>J. Am. Chem. Soc.</i> <b>2020</b> , <i>142</i> , 7328.     |
|    | <br><b>1ak</b>   | C                 | <i>J. Org. Chem.</i> <b>2012</b> , <i>77</i> , 7092.          |
|  | <br><b>1al</b>  | C                 | <i>Angew. Chem. Int. Ed.</i> <b>2020</b> , <i>59</i> , 14404. |
|  | <br><b>1aw</b> | A                 | <i>Tetrahedron</i> <b>2010</b> , <i>66</i> , 8654.            |

## 2.2 Procedures and characterization of other alkyne substrates

### 2.2.1 Synthesis of 2-(4-(Prop-1-yn-1-yl)phenyl)propan-2-ol (1s).

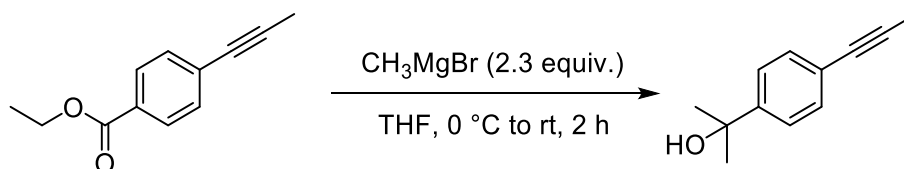

To a solution of ethyl 4-(prop-1-yn-1-yl)benzoate (0.51 g, 2.7 mmol, 1.0 equiv.) in THF (8 mL) was added dropwise CH<sub>3</sub>MgBr (2 M in THF, 3.1 mL, 6.2 mmol) at 0 °C. The reaction mixture was stirred at room temperature for 2 h and quenched with saturated aqueous NH<sub>4</sub>Cl (15 mL). The two layers were separated and the aqueous layer was extracted with EtOAc (3 × 15 mL). The com-

bined organic layers were washed with brine, dried over Na<sub>2</sub>SO<sub>4</sub>, and concentrated. The crude material was purified by flash chromatography on silica gel (5:1 petroleum ether/EtOAc) to afford the title product (0.35 g, 75% yield).

### 2.2.2 Synthesis of 1-(But-2-yn-1-yloxy)-4-(prop-1-yn-1-yl)benzene (1v).

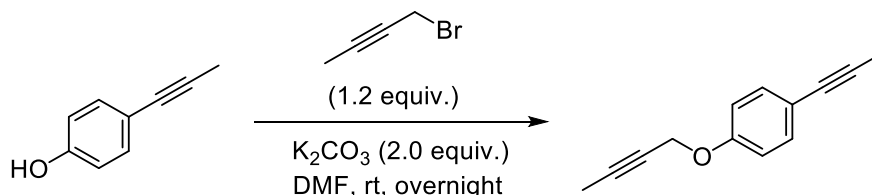

To a solution of 4-(prop-1-yn-1-yl)phenol (0.26 g, 2.0 mmol, 1.0 equiv.) in DMF (3 mL) was added K<sub>2</sub>CO<sub>3</sub> (0.55 g, 4.0 mmol) and 1-bromobut-2-yne (0.32 g, 2.4 mmol) at room temperature. The reaction was stirred at room temperature overnight. Water (10 mL) and EtOAc (15 mL) were added. The two layers were separated and the aqueous layer was extracted with EtOAc (2 × 15 mL). The combined organic layers were washed with water (2 × 10 mL) and brine, dried over Na<sub>2</sub>SO<sub>4</sub>, and concentrated. The residue was purified by flash chromatography on silica gel (petroleum ether) to afford the desired product (0.34 g, 91% yield).

### 2.2.3 Synthesis of 2-(Prop-1-yn-1-yl)phenol (1z).

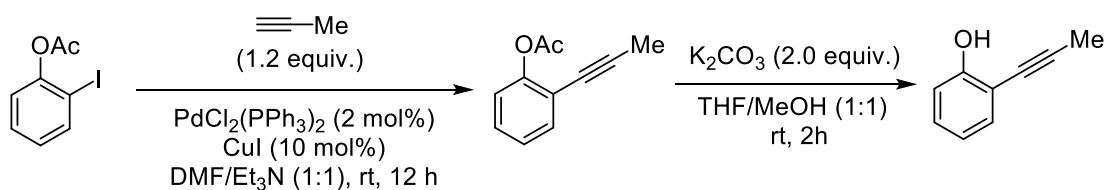

**2-(Prop-1-yn-1-yl)phenyl Acetate:** Following the general procedure A with 2-iodophenyl acetate (1.31 g, 5.0 mmol, 1.0 equiv.), the crude product was purified by flash chromatography on silica gel (petroleum ether) to afford the title product as colorless liquid (0.73 g, 84% yield).

**2-(Prop-1-yn-1-yl)phenol (1z):** To a solution of 2-(prop-1-yn-1-yl)phenyl acetate (0.35 g, 2.0 mmol, 1.0 equiv.) in THF (2.5 mL) and MeOH (2.5 mL) was added K<sub>2</sub>CO<sub>3</sub> (0.55 g, 4.0 mmol) at room temperature. The reaction mixture

was stirred at room temperature for 3 h. Water (10 mL) and EtOAc (15 mL) was added. The two layers were separated and the aqueous layer was extracted with EtOAc (2 × 15 mL). The combined organic layers were washed with brine, dried over Na<sub>2</sub>SO<sub>4</sub>, and concentrated. The crude material was purified by flash chromatography on silica gel (5:1 petroleum ether/EtOAc) to afford the title product (0.26 g, 98% yield). The <sup>1</sup>H NMR spectral data are identical to those previously reported.<sup>1</sup>

#### 2.2.4 Synthesis of ([1,1'-Biphenyl]-4-ylethynyl)trimethylsilane (1am).

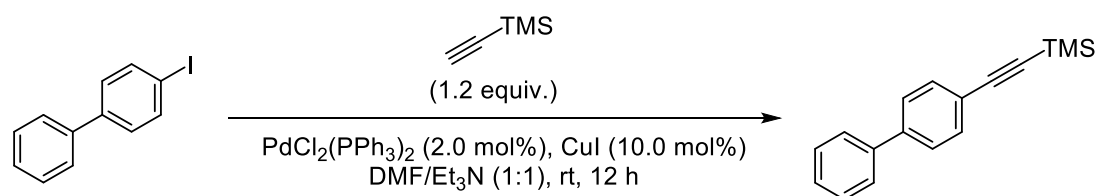

An oven-dried round bottom flask, which was equipped with a magnetic stir bar and charged with 4-iodo-1,1'-biphenyl (1.40 g, 5.0 mmol, 1.0 equiv.), PdCl<sub>2</sub>(PPh<sub>3</sub>)<sub>2</sub> (70.2 mg, 2 mol%), and CuI (95.2 mg, 10 mol%), was evacuated and backfilled with argon. Ethynyltrimethylsilane (0.85 mL, 6.0 mmol), Et<sub>3</sub>N (5 mL), and DMF (5 mL) were added through the septum via syringe at room temperature. The reaction was stirred at room temperature for 12 h. Saturated aqueous NH<sub>4</sub>Cl (10 mL) and EtOAc (15 mL) were added. The two layers were separated and the aqueous layer was extracted with EtOAc (2 × 15 mL). The combined organic layers were washed with water (2 × 10 mL) and brine, dried over Na<sub>2</sub>SO<sub>4</sub>, and concentrated. The residue was purified by flash chromatography on silica gel (petroleum ether) to afford the desired product (1.03 g, 82% yield). The <sup>1</sup>H NMR spectral data are identical to those previously reported.<sup>2</sup>

#### 2.2.5 Synthesis of (8*R*,9*S*,13*S*,14*S*)-13-Methyl-3-(prop-1-yn-1-yl)-6,7,8,9,11,12,13,14,15,16-decahydro-17*H*-cyclopenta[*a*]phenanthren-17-one (1ar).

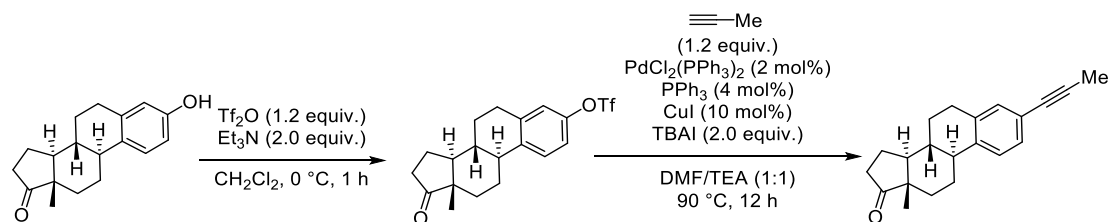

To a solution of estrone (1.35 g, 5.0 mmol, 1.0 equiv.) and Et<sub>3</sub>N (1.39 mL, 10.0 mmol) in CH<sub>2</sub>Cl<sub>2</sub> (25 mL) was added dropwise trifluoromethanesulfonic anhydride (1.01 mL, 6.0 mmol) under argon atmosphere at 0 °C. The reaction mixture was stirred at 0 °C for 1 h and quenched with saturated aqueous NaHCO<sub>3</sub> (20 mL). The two layers were separated and the aqueous layer was extracted with EtOAc (3 × 20 mL). The combined organic layers were washed with brine, dried over Na<sub>2</sub>SO<sub>4</sub>, and concentrated. The residue was purified by flash chromatography on silica gel (10:1 petroleum ether/EtOAc) to afford estron-3-yl triflate (1.88 g, 93% yield).

An oven-dried round bottom flask, which was equipped with a magnetic stir bar and charged with estron-3-yl triflate (1.61 g, 4.0 mmol, 1.0 equiv.), PPh<sub>3</sub> (42.0 mg, 4 mol%), PdCl<sub>2</sub>(PPh<sub>3</sub>)<sub>2</sub> (56.1 mg, 2 mol%), CuI (76.2 mg, 10 mol%), and tetrabutylammonium iodide (2.95 g, 8.0 mmol), was evacuated and backfilled with argon. Propyne (1.0 M in DMF, 4.8 mL, 4.8 mmol) and Et<sub>3</sub>N (4.0 mL) were added through the septum via syringe at room temperature. The reaction was stirred at 90 °C for 12 h. Saturated aqueous NH<sub>4</sub>Cl (10 mL) and EtOAc (15 mL) were added. The two layers were separated and the aqueous layer was extracted with EtOAc (3 × 15 mL). The combined organic layers were washed with water (2 × 10 mL) and brine, dried over Na<sub>2</sub>SO<sub>4</sub>, and concentrated. The residue was purified by flash chromatography on silica gel (30:1 petroleum ether/EtOAc) to afford the title product (0.64 g, 54% yield). The <sup>1</sup>H NMR spectral data are identical to those previously reported.<sup>3</sup>

## 2.2.6 Synthesis

of

(3*R*,4*R*)-1-(4-Fluorophenyl)-3-((*S*)-3-(4-fluorophenyl)-3-hydroxypropyl)-4-

#### 4-(Prop-1-yn-1-yl)phenylazetididin-2-one (1as)

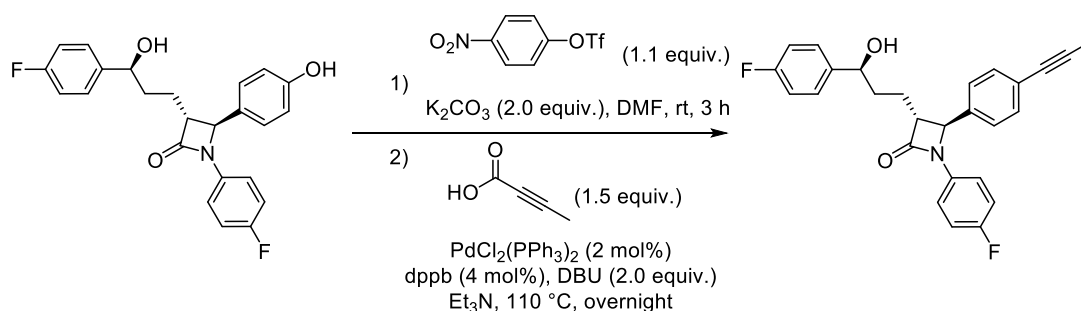

To a mixture of ezetimibe (0.82 g, 2.0 mmol, 1.0 equiv.) and  $\text{K}_2\text{CO}_3$  (0.55 g, 4.0 mmol) in DMF (10 mL) was added 4-nitrophenyl trifluoromethanesulfonate (0.60 g, 2.2 mmol) at room temperature. The reaction mixture was stirred at room temperature for 3 h. Saturated aqueous  $\text{NaHCO}_3$  (10 mL) and EtOAc (15 mL) were added. The two layers were separated and the aqueous layer was extracted with EtOAc (3 x 20 mL). The combined organic layers were washed with water (2 x 10 mL) and brine, dried over  $\text{Na}_2\text{SO}_4$ , and concentrated. The residue was purified by flash chromatography on silica gel (5:1 petroleum ether/EtOAc) to afford ezetimibe triflate (0.96 g, 89% yield). The  $^1\text{H}$  NMR spectral data are identical to those previously reported.<sup>4</sup>

An oven-dried round bottom flask, which was equipped with a magnetic stir bar and charged with ezetimibe triflate (541.5 mg, 1.0 mmol, 1.0 equiv.),  $\text{PdCl}_2(\text{PPh}_3)_2$  (14.0 mg, 2 mol%), 1,4-bis(diphenyl-phosphino)butane (dppb, 17.1 mg, 4 mol%), and but-2-ynoic acid (126.1 mg, 1.5 mmol), was evacuated and backfilled with argon. DMSO (5 mL) was added through the septum via syringe at room temperature. The reaction mixture was stirred at 110 °C for 12 h. Saturated aqueous  $\text{NH}_4\text{Cl}$  (10 mL) and EtOAc (15 mL) were added. The two layers were separated and the aqueous layer was extracted with EtOAc (3 x 15 mL). The combined organic layers were washed with water (2 x 10 mL) and brine, dried over  $\text{Na}_2\text{SO}_4$ , and concentrated. The residue was purified by flash chromatography on silica gel (5:1 petroleum ether/EtOAc) to afford the title product (0.36 g, 84% yield).



## 2.2.7 Synthesis of 4-Methyl-7-(prop-1-yn-1-yl)-2H-chromen-2-one (1at)

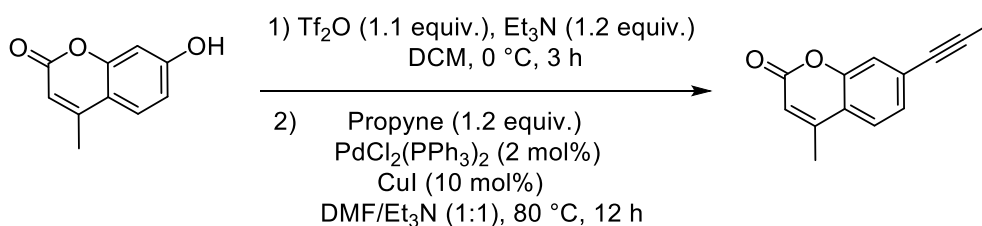

To a solution of 4-methylumbelliferone (0.88 g, 5.0 mmol, 1.0 equiv.) and  $\text{Et}_3\text{N}$  (0.83 mL, 6.0 mmol) in  $\text{CH}_2\text{Cl}_2$  (20 mL) was added dropwise trifluoromethanesulfonic anhydride (0.93 mL, 5.5 mmol) under argon atmosphere at 0 °C. The reaction mixture was stirred at 0 °C for 3 h and quenched with saturated aqueous  $\text{NaHCO}_3$  (10 mL). The two layers were separated and the aqueous layer was extracted with  $\text{EtOAc}$  (3 × 20 mL). The combined organic layers were washed with brine, dried over  $\text{Na}_2\text{SO}_4$ , and concentrated. The residue was purified by flash chromatography on silica gel (30:1 petroleum ether/ $\text{EtOAc}$ ) to afford 4-methylumbelliferone triflate (1.27 g, 83% yield).

An oven-dried round bottom flask, which was equipped with a magnetic stir bar and charged with 4-methylumbelliferone triflate (0.61 g, 2.0 mmol, 1.0 equiv.),  $\text{PdCl}_2(\text{PPh}_3)_2$  (28.1 mg, 2 mol%), and CuI (38.1 mg, 10 mol%), was evacuated and backfilled with argon. Propyne (1.0 M in DMF, 2.4 mL, 2.4 mmol) and  $\text{Et}_3\text{N}$  (2.0 mL) were added through the septum via syringe at room temperature. The reaction was stirred at 80 °C for 12 h. Saturated aqueous  $\text{NH}_4\text{Cl}$  (10 mL) and  $\text{EtOAc}$  (20 mL) were added. The two layers were separated and the aqueous layer was extracted with  $\text{EtOAc}$  (2 × 20 mL). The combined organic layers were washed with water (2 × 10 mL) and brine, dried over  $\text{Na}_2\text{SO}_4$ , and concentrated. The residue was purified by flash chromatography on silica gel (60:1 petroleum ether/ $\text{EtOAc}$ ) to afford the title product (0.31g, 78% yield). The  $^1\text{H}$  NMR spectral data are identical to those previously reported.<sup>5</sup>

## 2.2.8 Synthesis of Isopropyl 2-Methyl-2-(4-(4-(prop-1-yn-1-yl)benzoyl)phenoxy)propanoate (1au)

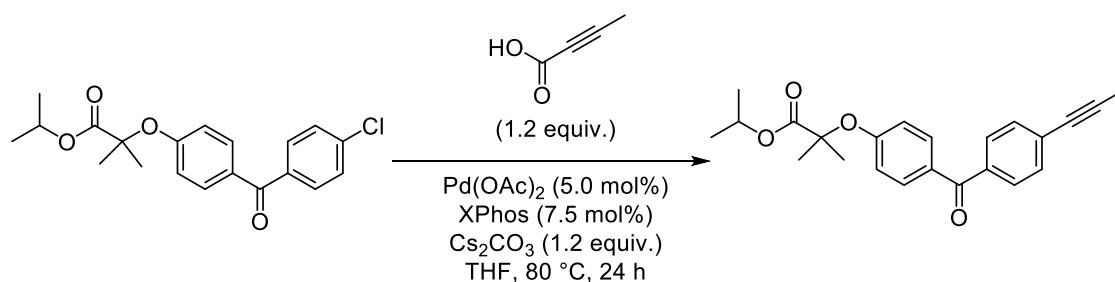

An oven-dried round bottom flask, which was equipped with a magnetic stir bar and charged with fenofibrate (1.80 g, 5.0 mmol, 1.0 equiv.),  $\text{Pd}(\text{OAc})_2$  (56.1 mg, 5 mol%),  $\text{XPhos}$  (178.9 mg, 7.5 mol%),  $\text{Cs}_2\text{CO}_3$  (1.95 g, 6.0 mmol), and but-2-ynoic acid (0.50 g, 6.0 mmol), was evacuated and backfilled with argon.  $\text{THF}$  (20 mL) was added through the septum via syringe at room temperature. The reaction was stirred at 80 °C for 24 h and saturated aqueous  $\text{NH}_4\text{Cl}$  (10 mL) was added. The two layers were separated and the aqueous layer was extracted with  $\text{EtOAc}$  (3 × 20 mL). The combined organic layers were washed with brine, dried over  $\text{Na}_2\text{SO}_4$ , and concentrated. The residue was purified by flash chromatography on silica gel (30:1 petroleum ether/ $\text{EtOAc}$ ) to afford the title product (1.02 g, 56% yield).

### 3. Synthesis and characterization of allylsulfonates and allylsulfonyl fluoride

#### 3.1 Synthesis of Allylsulfonyl Chloride

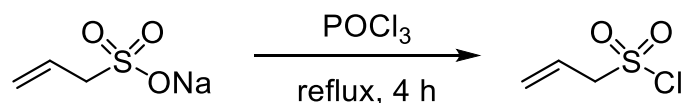

A mixture of sodium allylsulfonate (50.0 g, 0.35 mol) and phosphoryl chloride (100 mL) was refluxed for 4 h. The reaction mixture was cooled to room temperature and filtered through a short pad of silica gel. The filtrate was concentrated and purified by distillation to afford allylsulfonyl chloride as colorless liquid (40.2 g, 82% yield). The  $^1\text{H}$  NMR spectral data are identical to those previously reported.<sup>6</sup>

#### 3.2 Synthesis of Methyl Prop-2-ene-1-sulfonate (2a)

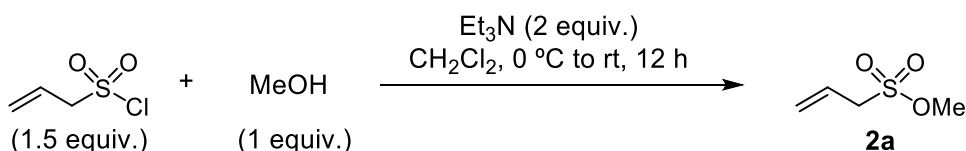

To a solution of MeOH (4.0 mL, 0.1 mol, 1.0 equiv.) and Et<sub>3</sub>N (27.8 mL, 0.2 mol) in dry CH<sub>2</sub>Cl<sub>2</sub> (200 mL) was added allylsulfonyl chloride (21.1 g, 0.15 mol) at 0 °C. The reaction was stirred at room temperature for 12 h and water (50 mL) was added. The two layers were separated and the aqueous layer was extracted with CH<sub>2</sub>Cl<sub>2</sub> (3 × 100 mL). The combined organic layers were washed with saturated aqueous NaHCO<sub>3</sub> (2 × 40 mL) and brine, dried over Na<sub>2</sub>SO<sub>4</sub>, and concentrated. The residue was purified by flash chromatography on silica gel (petroleum ether/EtOAc) to afford the title product (7.1 g, 52% yield).

### 3.3 General procedure D: synthesis of alkyl allylsulfonates

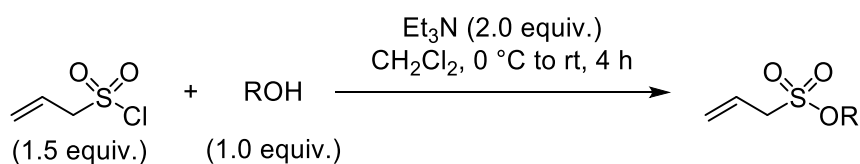

To a solution of alcohol (5.0 mmol, 1.0 equiv.) and Et<sub>3</sub>N (1.39 mL, 10.0 mmol) in dry CH<sub>2</sub>Cl<sub>2</sub> (10 mL) was added allylsulfonyl chloride (1.05 g, 7.5 mmol) at 0 °C. The reaction was stirred at room temperature for 4 h and water (10 mL) was added. The two layers were separated and the aqueous layer was extracted with CH<sub>2</sub>Cl<sub>2</sub> (3 × 10 mL). The combined organic layers were washed with saturated aqueous NaHCO<sub>3</sub> (2 × 5 mL) and brine, dried over Na<sub>2</sub>SO<sub>4</sub>, and concentrated. The residue was purified by flash chromatography on silica gel (petroleum ether/EtOAc) to afford the title product.

**Table S2. Synthesis of Alkyl Allylsulfonates**

| Alcohol | Allylsulfonate | General procedure | Analytical reference |
|---------|----------------|-------------------|----------------------|
|         | <b>2b</b>      | D                 | See details in below |

|                                                                                   |                                                                                             |   |                                                            |
|-----------------------------------------------------------------------------------|---------------------------------------------------------------------------------------------|---|------------------------------------------------------------|
| 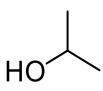 |  <b>2c</b> | D | <i>Chem. Eur. J.</i><br><b>2010</b> , <i>16</i> ,<br>5969. |
|  |  <b>2e</b> | D | See details in<br>below                                    |
|  |  <b>2f</b> | D | See details in<br>below                                    |

### 3.4 Synthesis of 2,2,2-Trifluoroethyl Prop-2-ene-1-sulfonate (2d)

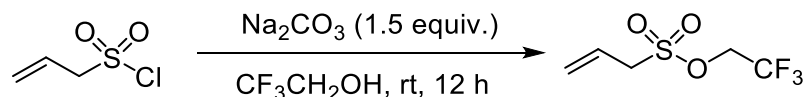

To a mixture of  $\text{Na}_2\text{CO}_3$  (0.78 g, 7.5 mmol) in  $\text{CF}_3\text{CH}_2\text{OH}$  (3 mL) was added allylsulfonyl chloride (0.70 g, 5.0 mmol, 1.0 equiv.) at room temperature. The reaction was stirred at room temperature 12 h. Water (10 mL) and EtOAc (15 mL) were added. The two layers were separated and the aqueous layers were extracted with EtOAc (2 × 10 mL). The organic layers were washed with saturated aqueous  $\text{NaHCO}_3$  (2 × 5 mL) and brine, dried over  $\text{Na}_2\text{SO}_4$ , and concentrated. The residue was purified by flash chromatography on silica gel (10:1 petroleum ether/EtOAc) to afford the title product (0.46 g, 45% yield).

### 3.5 Synthesis of Allylsulfonyl Fluoride (4)

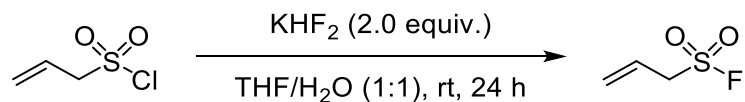

To a solution of  $\text{KHF}_2$  (15.6 g, 0.2 mol) in MeCN (75 mL) and  $\text{H}_2\text{O}$  (75 mL) was added dropwise allylsulfonyl chloride (14.1 g, 0.1 mol, 1.0 equiv.) at room temperature. The reaction was stirred at room temperature for 24 h and  $\text{CH}_2\text{Cl}_2$  (75 mL) was added. The two layers were separated and the aqueous layer was extracted with  $\text{CH}_2\text{Cl}_2$  (2 × 100 mL). The combined organic layers were washed with saturated aqueous  $\text{NaHCO}_3$  (3 × 30 mL) and brine, dried

over Na<sub>2</sub>SO<sub>4</sub>, and concentrated. The residue was purified by distillation to afford allylsulfonyl fluoride **4** as colorless liquid (9.8 g, 79% yield).

### 3.6 Synthesis of (Allylsulfonyl)benzene

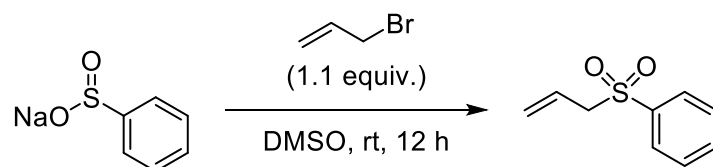

To a solution of sodium benzenesulfinate (1.64 g, 10.0 mmol, 1 equiv.) in DMSO (18 mL) was added allyl bromide (0.95 mL, 11.0 mmol) at room temperature. The reaction mixture was stirred at room temperature for 12 h. Water (10 mL) and EtOAc (20 mL) were added. The two layers were separated and the aqueous layer was extracted with EtOAc (2 × 20 mL). The organic layers were washed with water (3 × 10 mL) and brine, dried over Na<sub>2</sub>SO<sub>4</sub>, and concentrated. The residue was purified by flash chromatography on silica gel (10:1 petroleum ether/EtOAc) to afford the title product (1.50 g, 82% yield). The <sup>1</sup>H NMR spectral data are identical to those previously reported.<sup>7</sup>

#### 4. Characterization of substrates

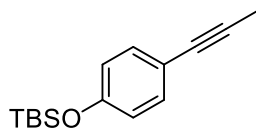

##### **tert-Butyldimethyl(4-(prop-1-yn-1-yl)phenoxy)silane (1g)**

Following the general procedure A, the crude product was purified by flash chromatography on silica gel (petroleum ether) to afford **1g** as colorless oil (1.14 g, 92% yield).

**<sup>1</sup>H NMR** (300 MHz, CDCl<sub>3</sub>) δ 7.28 (d, 2H, *J* = 8.7 Hz), 6.76 (d, 2H, *J* = 8.7 Hz), 2.04 (s, 3H), 0.99 (s, 9H), 0.20 (s, 6H).

**<sup>13</sup>C NMR** (75 MHz, CDCl<sub>3</sub>) δ 155.2, 132.7, 120.0, 116.8, 84.2, 79.4, 25.6, 18.2, 4.3, -4.5.

**HRMS** (ESI) calcd for C<sub>15</sub>H<sub>23</sub>OSi<sup>+</sup> [M+H]<sup>+</sup> 247.1513, found 247.1511.

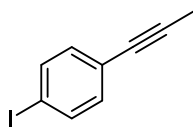

##### **1-Iodo-4-(prop-1-yn-1-yl)benzene (1n)**

Following the general procedure A, the crude product was purified by flash chromatography on silica gel (petroleum ether) to afford **1n** as a white solid (0.80 g, 66% yield).

**m.p.** 36.7–37.8 °C.

**<sup>1</sup>H NMR** (300 MHz, CDCl<sub>3</sub>) δ 7.61 (d, 2H, *J* = 8.5 Hz), 7.11 (d, 2H, *J* = 8.5 Hz), 2.03 (s, 3H).

**<sup>13</sup>C NMR** (75 MHz, CDCl<sub>3</sub>) δ 137.3, 133.1, 123.5, 93.1, 87.4, 78.9, 4.4.

**HRMS** (EI) calcd for C<sub>9</sub>H<sub>7</sub>I<sup>+</sup> [M]<sup>+</sup> 241.9587, found 241.9586.

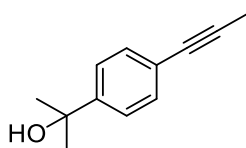

##### **2-(4-(Prop-1-yn-1-yl)phenyl)propan-2-ol (1s)**

**m.p.** 64.0–65.2 °C.

**<sup>1</sup>H NMR** (300 MHz, CDCl<sub>3</sub>) δ 7.41 (d, 2H, *J* = 8.7 Hz), 7.36 (d, 2H, *J* = 8.7 Hz), 2.05 (s, 3H), 1.71 (s, 1H), 1.57 (s, 6H).

**<sup>13</sup>C NMR** (75 MHz, CDCl<sub>3</sub>) δ 148.4, 131.2, 124.3, 122.2, 85.5, 79.5, 72.3, 31.5, 4.3.

**HRMS** (ESI) calcd for C<sub>12</sub>H<sub>14</sub>NaO<sup>+</sup> [M+Na]<sup>+</sup> 197.0937, found 197.0934.

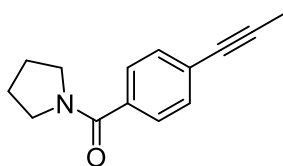

**(4-(Prop-1-yn-1-yl)phenyl)(pyrrolidin-1-yl)methanone (1t)**

Following the general procedure A, the crude product was purified by flash chromatography on silica gel (5:1 petroleum ether/EtOAc) to afford **1t** as a white solid (0.91 g, 85% yield).

**m.p.** 139.2–140.8 °C.

**<sup>1</sup>H NMR** (300 MHz, CDCl<sub>3</sub>) δ 7.45 (d, 2H, *J* = 8.5 Hz), 7.40 (d, 2H, *J* = 8.5 Hz), 3.64 (t, 2H, *J* = 6.7 Hz), 3.42 (t, 2H, *J* = 6.7 Hz), 2.06 (s, 3H), 2.00-1.83 (m, 4H).

**<sup>13</sup>C NMR** (75 MHz, CDCl<sub>3</sub>) δ 168.9, 135.8, 131.1, 126.9, 125.5, 87.4, 79.1, 49.4, 46.1, 26.2, 24.2, 4.2.

**HRMS** (ESI) calcd for C<sub>14</sub>H<sub>16</sub>NO<sup>+</sup> [M+H]<sup>+</sup> 214.1226, found 214.1231.

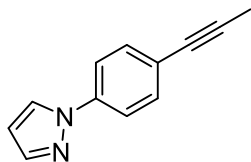

**1-(4-(Prop-1-yn-1-yl)phenyl)-1H-pyrazole (1u)**

Following the general procedure B, the crude product was purified by flash chromatography on silica gel (4:1 petroleum ether/EtOAc) to afford **1u** as a white solid (0.75 g, 82% yield).

**m.p.** 80.2–81.6 °C.

**<sup>1</sup>H NMR** (300 MHz, CDCl<sub>3</sub>) δ 7.90 (d, 1H, *J* = 2.5 Hz), 7.72 (d, 1H, *J* = 1.5 Hz), 7.62 (d, 2H, *J* = 8.7 Hz), 7.46 (d, 2H, *J* = 8.7 Hz), 6.46 (dd, 1H, *J* = 2.5, 1.5 Hz), 2.06 (s, 3H).

**<sup>13</sup>C NMR** (75 MHz, CDCl<sub>3</sub>) δ 141.1, 139.0, 132.5, 126.5, 122.0, 118.6, 107.7, 86.6, 78.9, 4.3.

**HRMS** (ESI) calcd for C<sub>12</sub>H<sub>11</sub>N<sub>2</sub><sup>+</sup> [M+H]<sup>+</sup> 183.0917, found 183.0917.

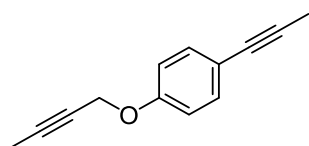

**1-(But-2-yn-1-yloxy)-4-(prop-1-yn-1-yl)benzene (1v)**

**m.p.** 49.1–51.2 °C.

**<sup>1</sup>H NMR** (300 MHz, CDCl<sub>3</sub>) δ 7.32 (d, 2H, *J* = 8.9 Hz), 6.87 (d, 2H, *J* = 8.9 Hz), 4.63 (q, 2H, *J* = 2.3 Hz), 2.03 (s, 3H), 1.86 (t, 3H, *J* = 2.3 Hz).

**<sup>13</sup>C NMR** (75 MHz, CDCl<sub>3</sub>) δ 157.1, 132.6, 116.7, 114.6, 84.2, 83.9, 79.3, 73.7, 56.3, 4.2, 3.6.

**HRMS** (ESI) calcd for C<sub>13</sub>H<sub>13</sub>O<sup>+</sup> [M+H]<sup>+</sup> 185.0961, found 185.0963.

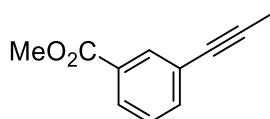

**Methyl 3-(Prop-1-yn-1-yl)benzoate (1y)**

Following the general procedure A, the crude product was purified by flash chromatography on silica gel (30:1 petroleum ether/EtOAc) to afford **1y** as a white solid (0.72 g, 83% yield).

**m.p.** 27.9–30.1 °C.

**<sup>1</sup>H NMR** (400 MHz, CDCl<sub>3</sub>) δ 8.07 (dd, 1H, *J* = 1.4, 1.4 Hz), 7.93 (ddd, 1H, *J* = 7.8, 1.4, 1.4 Hz), 7.56 (ddd, 1H, *J* = 7.7, 1.4, 1.4 Hz), 7.36 (dd, 1H, *J* = 7.8, 7.7 Hz), 3.91 (s, 3H), 2.06 (s, 3H).

**<sup>13</sup>C NMR** (75 MHz, CDCl<sub>3</sub>) δ 166.4, 135.6, 132.5, 130.2, 128.4, 128.2, 124.4, 86.9, 78.7, 52.1, 4.2.



**HRMS** (ESI) calcd for  $C_{11}H_{11}O_2^+$   $[M+H]^+$  175.0754, found 175.0755.

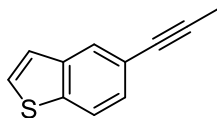

### 5-(Prop-1-yn-1-yl)benzo[b]thiophene (**1ac**)

Following the general procedure B, the crude product was purified by flash chromatography on silica gel (30:1 petroleum ether/EtOAc) to afford **1ac** as colorless liquid (0.72 g, 84% yield).

**$^1H$  NMR** (300 MHz,  $CDCl_3$ )  $\delta$  7.85 (dd, 1H,  $J = 1.5, 0.6$  Hz), 7.75 (d, 1H,  $J = 8.4$  Hz), 7.40 (d, 1H,  $J = 5.6$  Hz), 7.34 (dd, 1H,  $J = 8.4, 1.5$  Hz), 7.24 (dd, 1H,  $J = 5.6, 0.6$  Hz), 2.06 (s, 3H).

**$^{13}C$  NMR** (75 MHz,  $CDCl_3$ )  $\delta$  139.4, 138.8, 127.3, 127.0, 126.5, 123.4, 122.1, 119.8, 85.2, 79.9, 4.2.

**HRMS** (EI) calcd for  $C_{11}H_7S^+$   $[M]^+$  172.0341, found 171.0336.

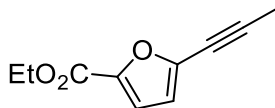

### Ethyl 5-(Prop-1-yn-1-yl)furan-2-carboxylate (**1af**)

Following the general procedure A, the crude product was purified by flash chromatography on silica gel (10:1 petroleum ether/EtOAc) to afford **1af** as a white solid (0.56 g, 63% yield).

**m.p.** 31.8–32.6 °C.

**$^1H$  NMR** (300 MHz,  $CDCl_3$ )  $\delta$  7.12 (d, 1H,  $J = 3.5$  Hz), 6.51 (d, 1H,  $J = 3.5$  Hz), 4.36 (q, 2H,  $J = 7.1$  Hz), 2.09 (s, 3H), 1.37 (t, 3H,  $J = 7.1$  Hz).

**$^{13}C$  NMR** (75 MHz,  $CDCl_3$ )  $\delta$  158.0, 143.8, 140.5, 118.4, 115.0, 92.6, 69.6, 60.9, 14.2, 4.4.

**HRMS** (ESI) calcd for  $C_{10}H_{10}NaO_3^+$   $[M+Na]^+$  201.0522, found 201.0524.

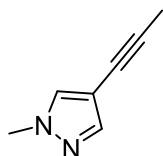

**Methyl-4-(prop-1-yn-1-yl)-1H-pyrazole (1ag)**

Following the general procedure B, the crude product was purified by flash chromatography on silica gel (5:1 petroleum ether/EtOAc) to afford **1ag** as colorless liquid (0.44 g, 73% yield).

**<sup>1</sup>H NMR** (300 MHz, CDCl<sub>3</sub>) δ 7.50 (s, 1H), 7.40 (s, 1H), 3.85 (s, 3H), 2.00 (s, 3H).

**<sup>13</sup>C NMR** (75 MHz, CDCl<sub>3</sub>) δ 141.4, 131.9, 103.6, 85.7, 70.3, 38.7, 4.0.

**HRMS** (ESI) calcd for C<sub>7</sub>H<sub>9</sub>N<sub>2</sub><sup>+</sup> [M+H]<sup>+</sup> 121.0760, found 121.0762.

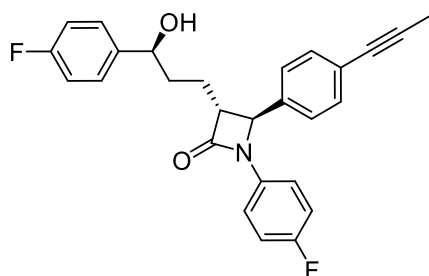

**(3R,4S)-1-(4-Fluorophenyl)-3-((S)-3-(4-fluorophenyl)-3-hydroxypropyl)-4-(4-(prop-1-yn-1-yl)phenyl)azetidin-2-one (1as)**

m.p. 56.7–58.2 °C.

**<sup>1</sup>H NMR** (300 MHz, CDCl<sub>3</sub>) δ 7.38 (d, 2H, *J* = 8.3 Hz), 7.33-7.16 (m, 6H), 7.07-6.88 (m, 4H), 4.76-4.68 (m, 1H), 4.60 (d, 1H, *J* = 2.4 Hz), 3.13-3.03 (m, 1H), 2.21 (brd, 1H, *J* = 3.2 Hz), 2.05 (s, 3H), 2.06-1.82 (m, 4H).

**<sup>13</sup>C NMR** (101 MHz, acetone-*d*<sub>6</sub>) δ 167.8, 162.6 (d, *J* = 242.4 Hz), 159.9 (d, *J* = 240.6 Hz), 142.8 (d, *J* = 2.9 Hz), 138.8, 135.3 (d, *J* = 2.6 Hz), 132.8, 128.4 (d, *J* = 7.9 Hz), 127.1, 125.0, 119.1 (d, *J* = 7.9 Hz), 116.4 (d, *J* = 22.8 Hz), 115.5 (d, *J* = 21.3 Hz), 87.3, 79.9, 72.9, 61.3, 61.1, 37.6, 25.8, 4.0.

**HRMS** (ESI) calcd for C<sub>27</sub>H<sub>23</sub>F<sub>2</sub>KNO<sub>2</sub><sup>+</sup> [M+K]<sup>+</sup> 470.1328, found 470.1318.

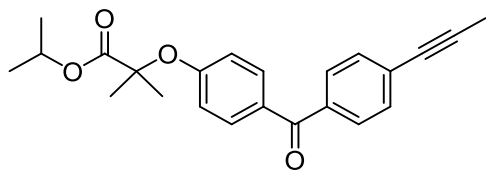

**Isopropyl 2-Methyl-2-(4-(4-(prop-1-yn-1-yl)benzoyl)phenoxy)propanoate (1au)**

**<sup>1</sup>H NMR** (300 MHz, CDCl<sub>3</sub>) δ 7.74 (d, 2H, *J* = 8.8 Hz), 7.68 (d, 2H, *J* = 8.2 Hz), 7.47 (d, 2H, *J* = 8.2 Hz), 6.86 (d, 2H, *J* = 8.8 Hz), 5.09 (hept, 1H, *J* = 6.3 Hz), 2.09 (s, 3H), 1.66 (s, 6H), 1.20 (d, 6H, *J* = 6.3 Hz).

**<sup>13</sup>C NMR** (101 MHz, CDCl<sub>3</sub>) δ 194.5, 172.9, 159.4, 136.6, 131.8, 131.1, 130.3, 129.5, 127.9, 117.1, 89.0, 79.23, 79.20, 69.1, 25.2, 21.4, 4.3.

**HRMS** (ESI) calcd for C<sub>23</sub>H<sub>25</sub>O<sub>4</sub><sup>+</sup> [M+H]<sup>+</sup> 365.1747, found 365.1739.

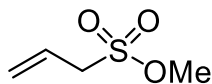

**Methyl Prop-2-ene-1-sulfonate (2a)**

**<sup>1</sup>H NMR** (300 MHz, CDCl<sub>3</sub>) δ 5.91 (ddt, 1H, *J* = 17.2, 9.8, 7.2 Hz), 5.55-5.49 (m, 1H), 5.48-5.43 (m, 1H), 3.92 (s, 3H), 3.86 (d, 2H, *J* = 7.2 Hz).

**<sup>13</sup>C NMR** (75 MHz, CDCl<sub>3</sub>) δ 124.4, 124.2, 56.2, 54.0.

**HRMS** (ESI) calcd for C<sub>3</sub>H<sub>5</sub>O<sub>3</sub>S<sup>-</sup> [M-CH<sub>3</sub>]<sup>-</sup> 120.9965, found 120.9964.

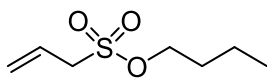

**Butyl Prop-2-ene-1-sulfonate (2b)**

Following the general procedure D, the crude product was purified by flash chromatography on silica gel (5:1 petroleum ether/EtOAc) to afford **2b** as colorless liquid (0.64 g, 73% yield).

**<sup>1</sup>H NMR** (300 MHz, CDCl<sub>3</sub>) δ 5.91 (ddt, 1H, *J* = 17.4, 10.3, 7.2 Hz), 5.51-5.42 (m, 2H), 4.25 (t, 2H, *J* = 6.5 Hz), 3.83 (d, 2H, *J* = 7.2 Hz), 1.78-1.67 (m, 2H), 1.50-1.38 (m, 2H), 0.95 (t, 3H, *J* = 7.4 Hz).

**<sup>13</sup>C NMR** (75 MHz, CDCl<sub>3</sub>) δ 124.5, 124.2, 70.5, 54.6, 31.0, 18.5, 13.3.

**HRMS** (ESI) calcd for  $C_7H_{15}O_3S^+$   $[M+H]^+$  179.0736, found 179.0738.

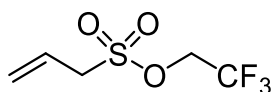

**2,2,2-Trifluoroethyl Prop-2-ene-1-sulfonate (2d)**

**$^1H$  NMR** (300 MHz,  $CDCl_3$ )  $\delta$  5.90 (ddt, 1H,  $J = 17.3, 10.2, 7.2$  Hz), 5.60-5.47 (m, 2H), 4.52 (q, 2H,  $J = 7.9$  Hz), 3.96 (d, 2H,  $J = 7.2$  Hz).

**$^{13}C$  NMR** (75 MHz,  $CDCl_3$ )  $\delta$  125.7, 123.2, 121.8 (q,  $J = 275.8$  Hz), 64.6 (q,  $J = 38.5$  Hz), 55.7.

**$^{19}F$  NMR** (282 MHz,  $CDCl_3$ )  $\delta$  -74.0 (t,  $J = 7.9$  Hz).

**HRMS** (EI) calcd for  $C_5H_7F_3O_3S^+$   $[M]^+$  204.0063, found 204.0053.

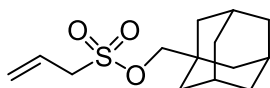

**((3r,5r,7r)-Adamantan-1-yl)methyl prop-2-ene-1-sulfonate (2e)**

Following the general procedure A, the crude product was purified by flash chromatography on silica gel (5:1 petroleum ether/EtOAc) to afford **2d** as a white solid (0.78 g, 57% yield).

**m.p.** 30.2–31.0 °C.

**$^1H$  NMR** (300 MHz,  $CDCl_3$ )  $\delta$  5.91 (ddt, 1H,  $J = 17.5, 10.3, 7.2$  Hz), 5.50-5.41 (m, 2H), 3.83 (d, 2H,  $J = 7.2$  Hz), 3.79 (s, 2H), 2.06-1.97 (m, 3H), 1.80-1.58 (m, 6H), 1.59-1.53 (m, 6H).

**$^{13}C$  NMR** (75 MHz,  $CDCl_3$ )  $\delta$  124.5, 124.3, 79.9, 54.4, 38.6, 36.6, 33.5, 27.7.

**HRMS** (ESI) calcd for  $C_{14}H_{22}NaO_3S^+$   $[M+Na]^+$  293.1182, found 293.1180.

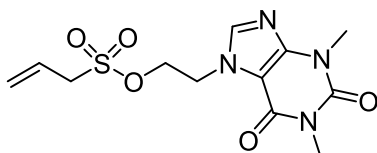

**2-(1,3-Dimethyl-2,6-dioxo-1,2,3,6-tetrahydro-7H-purin-7-yl)ethylprop-2-ene-1-sulfonate (2f)**

Following the general procedure D, the crude product was purified by flash chromatography on silica gel (1:2 petroleum ether/EtOAc) to afford **2f** as a white solid (0.67 g, 41% yield).

**m.p.** 131.0–132.1 °C.

**<sup>1</sup>H NMR** (300 MHz, CDCl<sub>3</sub>) δ 7.64 (s, 1H), 5.81 (ddt, 1H, *J* = 17.3, 10.1, 7.2 Hz), 5.49-5.35 (m, 2H), 4.62 (s, 4H), 3.81 (d, 2H, *J* = 7.2 Hz), 3.61 (s, 3H), 3.42 (s, 3H).

**<sup>13</sup>C NMR** (75 MHz, CDCl<sub>3</sub>) δ 155.2, 151.4, 149.1, 142.1, 124.9, 123.7, 106.2, 68.1, 54.9, 46.5, 29.7, 27.9.

**HRMS (ESI)** calcd for C<sub>12</sub>H<sub>16</sub>N<sub>4</sub>NaO<sub>5</sub>S<sup>+</sup> [M+Na]<sup>+</sup> 351.0734, found 351.0733.

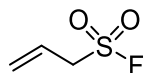

**Prop-2-ene-1-sulfonyl fluoride (4)**

**<sup>1</sup>H NMR** (300 MHz, CDCl<sub>3</sub>) δ 5.92 (ddt, 1H, *J* = 17.3, 10.2, 7.2 Hz), 5.65-5.55 (m, 2H), 4.13-4.04 (m, 2H).

**<sup>13</sup>C NMR** (75 MHz, CDCl<sub>3</sub>) δ 126.6, 122.0, 54.8 (d, *J* = 18.1 Hz).

**<sup>19</sup>F NMR** (282 MHz, CDCl<sub>3</sub>) δ 52.0.

**HRMS (ESI)** calcd for C<sub>3</sub>H<sub>6</sub>FO<sub>2</sub>S<sup>+</sup> [M+H]<sup>+</sup> 125.0067, found 125.0059.

### III. Screening of reaction conditions

**Standard conditions:** To a screw-cap test tube, which was equipped with a stir bar and charged with bpyCu(CF<sub>3</sub>)<sub>3</sub> (102.4 mg, 0.24 mmol, 1.2 equiv.) and (NH<sub>4</sub>)<sub>2</sub>S<sub>2</sub>O<sub>8</sub> (136.8 mg, 0.60 mmol, 3.0 equiv.), was evacuated and backfilled with argon. 1-Methoxy-4-(prop-1-yn-1-yl)benzene **1a** (29.2 mg, 0.20 mmol, 1.0 equiv.), methyl prop-2-ene-1-sulfonate **2a** (81.6 mg, 0.60 mmol, 3.0 equiv.), acetone (2 mL), CH<sub>3</sub>CN (2 mL), and H<sub>2</sub>O (80 μL) were added through septum via syringe. The reaction mixture was stirred at room temperature under blue LEDs (λ<sub>max</sub> = 460 nm) irradiation for 4 h. (Trifluoromethoxy)benzene was added as an internal standard and the yields were determined by <sup>19</sup>F NMR spectroscopy.

**Table S3. Screening of Reaction Conditions**

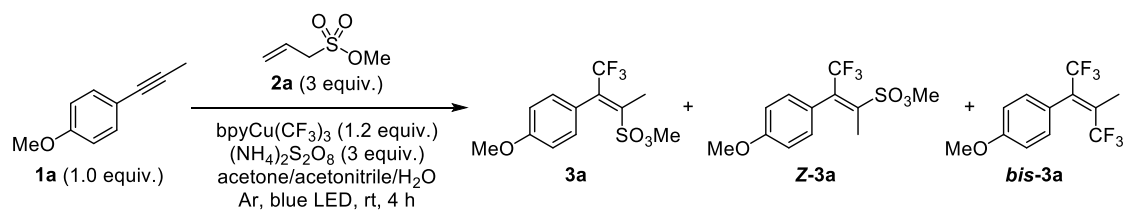

| Entry | Conditions                                                                                                             | <sup>19</sup> F NMR yield (%) |       |        | Ratio of<br>3a/Z-3a |
|-------|------------------------------------------------------------------------------------------------------------------------|-------------------------------|-------|--------|---------------------|
|       |                                                                                                                        | 3a                            | Z-3a  | bis-3a |                     |
| 1     | Standard conditions                                                                                                    | 77                            | 6     | 15     | 13 : 1              |
| 2     | acetone (4 mL) as solvent                                                                                              | 55                            | 6     | 26     | 9 : 1               |
| 3     | acetone/H <sub>2</sub> O (2 mL/2 mL) as solvent                                                                        | 7                             | ND    | 5      | -                   |
| 4     | acetone/H <sub>2</sub> O (3.2 mL/0.8 mL) as solvent                                                                    | 52                            | 5     | 20     | 10: 1               |
| 5     | acetone/H <sub>2</sub> O (4 mL/80 uL) as solvent                                                                       | 68                            | 5     | 23     | 14 : 1              |
| 6     | CH <sub>3</sub> CN (4 mL) as solvent                                                                                   | 57                            | 12    | 17     | 5 : 1               |
| 7     | CH <sub>3</sub> CN/H <sub>2</sub> O (4 mL/80 uL) as solvent                                                            | 69                            | 6     | 10     | 12 : 1              |
| 8     | THF/H <sub>2</sub> O (4 mL/80 uL) as solvent                                                                           | ND                            | ND    | trace  | -                   |
| 9     | CH <sub>2</sub> Cl <sub>2</sub> /H <sub>2</sub> O (4 mL/80 uL) as solvent                                              | 43                            | 5     | 19     | 9 : 1               |
| 10    | EtOAc/H <sub>2</sub> O (4 mL/80 uL) as solvent                                                                         | 29                            | ND    | 30     | -                   |
| 11    | acetone/CH <sub>3</sub> CN (2 mL/2 mL) as solvent                                                                      | 64                            | 8     | 22     | 8 : 1               |
| 12    | Na <sub>2</sub> S <sub>2</sub> O <sub>8</sub> instead of (NH <sub>4</sub> ) <sub>2</sub> S <sub>2</sub> O <sub>8</sub> | 52                            | 5     | 16     | 10 : 1              |
| 13    | K <sub>2</sub> S <sub>2</sub> O <sub>8</sub> instead of (NH <sub>4</sub> ) <sub>2</sub> S <sub>2</sub> O <sub>8</sub>  | 46                            | 4     | 20     | 11 : 1              |
| 14    | without (NH <sub>4</sub> ) <sub>2</sub> S <sub>2</sub> O <sub>8</sub>                                                  | 4                             | ND    | 24     | -                   |
| 15    | 365 nm instead of blue LED                                                                                             | 64                            | 5     | 13     | 13 : 1              |
| 16    | 254 nm instead of blue LED                                                                                             | 40                            | 4     | 10     | 10 : 1              |
| 17    | performed in dark                                                                                                      | ND                            | ND    | ND     | -                   |
| 18    | 2 equiv. of <b>2a</b> used instead                                                                                     | 66                            | 7     | 26     | 9 : 1               |
| 19    | AcOH (4 equiv.)                                                                                                        | 61                            | 7     | 24     | 9 : 1               |
| 20    | TFA (4 equiv.)                                                                                                         | 63                            | 5     | 12     | 13 : 1              |
| 21    | CF <sub>3</sub> SO <sub>3</sub> H (4 equiv.)                                                                           | 18                            | ND    | trace  | -                   |
| 22    | KF (4 equiv.)                                                                                                          | 50                            | 4     | 22     | 13 : 1              |
| 23    | NaOAc (4 equiv.)                                                                                                       | 33                            | trace | 22     | -                   |
| 24    | Cs <sub>2</sub> CO <sub>3</sub> (4 equiv.)                                                                             | 31                            | trace | 30     | -                   |
| 25    | K <sub>3</sub> PO <sub>4</sub> (4 equiv.)                                                                              | ND                            | ND    | 26     | -                   |
| 26    | pyridine (4 equiv.)                                                                                                    | 4                             | ND    | 7      | -                   |
| 27    | Et <sub>3</sub> N (4 equiv.)                                                                                           | 28                            | trace | 26     | -                   |
| 28    | FeCl <sub>3</sub> (4 equiv.)                                                                                           | 9                             | ND    | 4      | -                   |
| 29    | AlCl <sub>3</sub> (4 equiv.)                                                                                           | 10                            | trace | 5      | -                   |

## IV. Synthesis and characterization of products

### 4.1 General procedures for the synthesis of products

**General procedure A:** To a screw-cap test tube, which was equipped with a stir bar and charged with alkyne (0.20 mmol, 1.0 equiv., if it is a solid), bpyCu(CF<sub>3</sub>)<sub>3</sub> (102.4 mg, 0.24 mmol, 1.2 equiv.), and (NH<sub>4</sub>)<sub>2</sub>S<sub>2</sub>O<sub>8</sub> (136.8 mg, 0.60 mmol, 3.0 equiv.), was evacuated and backfilled with argon. Alkyne (0.20 mmol, 1.0 equiv., if it is liquid), alkyl allylsulfonate (0.60 mmol, 3 equiv.), acetone (2 mL), CH<sub>3</sub>CN (2 mL), and H<sub>2</sub>O (80 μL) were added through septum via syringe. The reaction mixture was stirred at room temperature under blue LEDs ( $\lambda_{\text{max}} = 460 \text{ nm}$ ) irradiation for 4 h. The solvent was removed on rotovap and the crude product was purified by flash chromatography on silica gel (petroleum ether/EtOAc) to afford the title product.

**General procedure B:** To a screw-cap test tube, which was equipped with a stir bar and charged with alkyne (0.20 mmol, 1.0 equiv., if it is a solid), bpyCu(CF<sub>3</sub>)<sub>3</sub> (128.0 mg, 0.30 mmol, 1.5 equiv.), and (NH<sub>4</sub>)<sub>2</sub>S<sub>2</sub>O<sub>8</sub> (136.8 mg, 0.60 mmol, 3.0 equiv.), was evacuated and backfilled with argon. Alkyne (0.20 mmol, 1.0 equiv., if it is liquid), alkyl allylsulfonate (0.60 mmol, 3 equiv.), acetone (2 mL), CH<sub>3</sub>CN (2 mL), and H<sub>2</sub>O (80 μL) were added through septum via syringe. The reaction mixture was stirred at room temperature under blue LEDs ( $\lambda_{\text{max}} = 460 \text{ nm}$ ) irradiation for 8 h. The solvent was removed on rotovap and the crude product was purified by flash chromatography on silica gel (petroleum ether/EtOAc) to afford the title product.

**General procedure C:** To a screw-cap test tube, which was equipped with a stir bar and charged with alkyne (0.20 mmol, 1.0 equiv., if it is a solid), bpyCu(CF<sub>3</sub>)<sub>3</sub> (128.0 mg, 0.30 mmol, 1.5 equiv.), and (NH<sub>4</sub>)<sub>2</sub>S<sub>2</sub>O<sub>8</sub> (136.8 mg, 0.60 mmol, 3.0 equiv.), was evacuated and backfilled with argon. Alkyne (0.20 mmol, 1.0 equiv., if it is liquid), allylsulfonyl fluoride (74.5 mg, 0.60 mmol, 3 equiv.), acetone (2 mL), CH<sub>3</sub>CN (2 mL), and H<sub>2</sub>O (80 μL) were added through



septum via syringe. The reaction mixture was stirred at room temperature under 365 nm (5 W) irradiation for 4 h. The solvent was removed on rotovap and the crude product was purified by flash chromatography on silica gel (petroleum ether/EtOAc) to afford the title product.

**General procedure D:** To a screw-cap test tube, which was equipped with a stir bar and charged with alkyne (0.20 mmol, 1.0 equiv., if it is a solid), bpyCu(CF<sub>3</sub>)<sub>3</sub> (128.0 mg, 0.30 mmol, 1.5 equiv.), and (NH<sub>4</sub>)<sub>2</sub>S<sub>2</sub>O<sub>8</sub> (136.8 mg, 0.60 mmol, 3.0 equiv.), was evacuated and backfilled with argon. Alkyne (0.20 mmol, 1.0 equiv., if it is liquid), allylsulfonyl fluoride (99.3 mg, 0.80 mmol, 4 equiv.), acetone (2 mL), CH<sub>3</sub>CN (2 mL), and H<sub>2</sub>O (80 μL) were added through septum via syringe. The reaction mixture was stirred at room temperature under 365 nm (5 W) irradiation for 8 h. The solvent was removed on rotovap and the crude product was purified by flash chromatography on silica gel (petroleum ether/EtOAc) to afford the title product.

## 4.2 Characterization of products

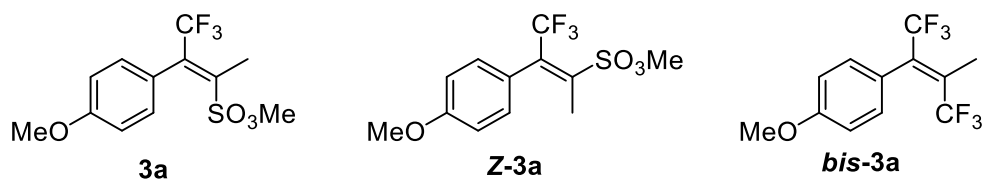

Following the general procedure A, the crude product was purified by flash chromatography on silica gel (petroleum ether to 60:1 petroleum ether/EtOAc) to sequentially afford **bis-3a** (colorless liquid, 5.2 mg, 9% yield), **3a** (white solid, 45.1 mg, 73% yield), and **Z-3a** (colorless liquid, 1.3 mg, 2% yield).

### Methyl (*E*)-4,4,4-Trifluoro-3-(4-methoxyphenyl)but-2-ene-2-sulfonate (**3a**)

m.p. 82.3–84.2 °C.

<sup>1</sup>H NMR (300 MHz, CDCl<sub>3</sub>) δ 7.17 (d, 2H, *J* = 8.8 Hz), 6.92 (d, 2H, *J* = 8.8 Hz), 3.83 (s, 3H), 3.66 (s, 3H), 2.44 (q, 3H, *J* = 2.4 Hz).

<sup>13</sup>C NMR (101 MHz, CDCl<sub>3</sub>) δ 160.4, 142.3 (q, *J* = 2.4 Hz), 139.1 (q, *J* = 31.3 Hz), 130.4, 123.3 (q, *J* = 1.2 Hz), 122.4 (q, *J* = 278.7 Hz), 113.6, 56.1, 55.2, 16.8 (q, *J* = 2.8 Hz).

<sup>19</sup>F NMR (282 MHz, CDCl<sub>3</sub>) δ -59.1 (q, *J* = 2.4 Hz).

HRMS (ESI) calcd for C<sub>12</sub>H<sub>13</sub>F<sub>3</sub>NaO<sub>4</sub>S<sup>+</sup> [M+Na]<sup>+</sup> 333.0379, found 333.0378.

### Methyl (*Z*)-4,4,4-Trifluoro-3-(4-methoxyphenyl)but-2-ene-2-sulfonate (**Z-3a**)

<sup>1</sup>H NMR (300 MHz, CDCl<sub>3</sub>) δ 7.11 (d, 2H, *J* = 8.6 Hz), 6.97 (d, 2H, *J* = 8.6 Hz), 3.98 (s, 3H), 3.85 (s, 3H), 2.01 (q, 3H, *J* = 2.1 Hz).

<sup>13</sup>C NMR (101 MHz, CDCl<sub>3</sub>) δ 160.3, 141.5 (q, *J* = 2.6 Hz), 138.5 (q, *J* = 34.5 Hz), 129.6, 125.1 (q, *J* = 2.1 Hz), 120.8 (q, *J* = 276.0 Hz), 114.4, 56.6, 55.3, 19.9.

<sup>19</sup>F NMR (282 MHz, CDCl<sub>3</sub>) δ -56.4 (q, *J* = 2.1 Hz).

HRMS (ESI) calcd for C<sub>12</sub>H<sub>13</sub>F<sub>3</sub>NaO<sub>4</sub>S<sup>+</sup> [M+Na]<sup>+</sup> 333.0379, found 333.0377.

**(E)-1-(1,1,1,4,4,4-Hexafluoro-3-methylbut-2-en-2-yl)-4-methoxybenzene  
(bis-3a)**

**<sup>1</sup>H NMR** (300 MHz, CDCl<sub>3</sub>) δ 7.08 (d, 2H, *J* = 8.9 Hz), 6.89 (d, 2 H, *J* = 8.9 Hz), 3.82 (s, 3H), 2.18 (q, 3H, *J* = 2.5 Hz).

**<sup>13</sup>C NMR** (101 MHz, CDCl<sub>3</sub>) δ 160.0, 136.0 (qq, *J* = 31.3, 3.2 Hz), 134.4 (qq, *J* = 29.2, 2.6 Hz), 130.2 (q, *J* = 1.8 Hz), 124.2 (q, *J* = 1.5 Hz), 123.0 (q, *J* = 276.6 Hz), 122.8 (q, *J* = 276.6 Hz), 113.5, 55.2, 14.3 (qq, *J* = 5.4, 2.7 Hz).

**<sup>19</sup>F NMR** (282 MHz, CDCl<sub>3</sub>) δ -59.0 (m), -61.2 (m).

**HRMS** (EI) calcd for C<sub>12</sub>H<sub>10</sub>F<sub>6</sub>O<sup>+</sup> [M]<sup>+</sup> 284.0630, found 284.0626.

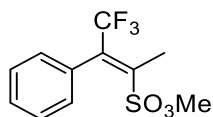

**Methyl (E)-4,4,4-Trifluoro-3-(p-tolyl)but-2-ene-2-sulfonate (3b)**

Following the general procedure A, the crude product was purified by flash chromatography on silica gel (80:1 petroleum ether/EtOAc) to afford **3b** as a white solid (41.5 mg, 74% yield).

**m.p.** 66.1–67.8 °C.

**<sup>1</sup>H NMR** (300 MHz, CDCl<sub>3</sub>) δ 7.46-7.37 (m, 3H), 7.26-7.21 (m, 2H), 3.65 (s, 3H), 2.46 (q, 3H, *J* = 2.4 Hz).

**<sup>13</sup>C NMR** (101 MHz, CDCl<sub>3</sub>) δ 142.4 (q, *J* = 2.4 Hz), 139.2 (q, *J* = 31.3 Hz), 131.4 (q, *J* = 1.2 Hz), 129.4, 128.8, 128.1, 122.3 (q, *J* = 278.7 Hz), 56.1, 16.7 (q, *J* = 2.8 Hz).

**<sup>19</sup>F NMR** (282 MHz, CDCl<sub>3</sub>) δ -58.8 (q, *J* = 2.4 Hz).

**HRMS** (ESI) calcd for C<sub>11</sub>H<sub>11</sub>F<sub>3</sub>NaO<sub>3</sub>S<sup>+</sup> [M+Na]<sup>+</sup> 303.0273, found 303.0273.

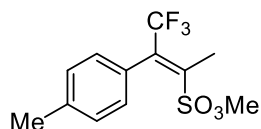

**Methyl (E)-4,4,4-Trifluoro-3-(p-tolyl)but-2-ene-2-sulfonate (3c)**

Following the general procedure A, the crude product was purified by flash chromatography on silica gel (80:1 petroleum ether/EtOAc) to afford **3c** as a white solid (38.1mg, 65% yield).

**m.p.** 64.2–66.1 °C.

**<sup>1</sup>H NMR** (300 MHz, CDCl<sub>3</sub>) δ 7.22 (d, 2H, *J* = 8.1 Hz), 7.12 (d, 2H, *J* = 8.1 Hz), 3.66 (s, 3H), 2.44 (q, 3H, *J* = 2.4 Hz), 2.38 (s, 3H).

**<sup>13</sup>C NMR** (101 MHz, CDCl<sub>3</sub>) δ 142.2 (q, *J* = 2.4 Hz), 139.5, 139.4 (q, *J* = 31.2 Hz), 128.8, 128.7, 128.4 (q, *J* = 1.2 Hz), 122.4 (q, *J* = 278.7 Hz), 56.1, 21.4, 16.7 (q, *J* = 2.8 Hz).

**<sup>19</sup>F NMR** (282 MHz, CDCl<sub>3</sub>) δ -58.9 (q, *J* = 2.4 Hz).

**HRMS** (ESI) calcd for C<sub>12</sub>H<sub>13</sub>F<sub>3</sub>NaO<sub>3</sub>S<sup>+</sup> [M+Na]<sup>+</sup> 317.0430, found 317.0429.

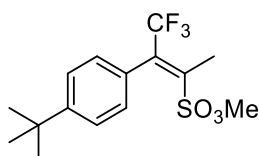

**Methyl (E)-4,4,4-Trifluoro-3-(4-(tert-butyl)phenyl)but-2-ene-2-sulfonate (3d)**

Following the general procedure A, the crude product was purified by flash chromatography on silica gel (80:1 petroleum ether/EtOAc) to afford **3d** as colorless oil (43.1mg, 64% yield).

**<sup>1</sup>H NMR** (300 MHz, CDCl<sub>3</sub>) δ 7.41 (d, 2H, *J* = 8.4 Hz), 7.16 (d, 2H, *J* = 8.4 Hz), 3.61 (s, 3H), 2.45 (q, 3H, *J* = 2.4 Hz), 1.33 (s, 9H).

**<sup>13</sup>C NMR** (101 MHz, CDCl<sub>3</sub>) δ 152.5, 142.2 (q, *J* = 2.4 Hz), 139.3 (q, *J* = 31.3 Hz), 128.6, 128.3 (q, *J* = 1.2 Hz), 125.0, 122.4 (q, *J* = 278.7 Hz), 56.1, 34.7, 31.2, 16.7 (q, *J* = 2.8 Hz).

**<sup>19</sup>F NMR** (282 MHz, CDCl<sub>3</sub>) δ -58.9 (q, *J* = 2.4 Hz).

**HRMS** (ESI) calcd for C<sub>15</sub>H<sub>19</sub>F<sub>3</sub>NaO<sub>3</sub>S<sup>+</sup> [M+Na]<sup>+</sup> 359.0899, found 359.0900.

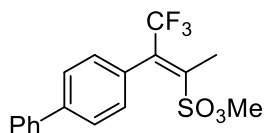

**Methyl (E)-4,4,4-Trifluoro-3-([1,1'-biphenyl]-4-yl)but-2-ene-2-sulfonate (3e)**

Following the general procedure A, the crude product was purified by flash chromatography on silica gel (60:1 petroleum ether/EtOAc) to afford **3e** as a white solid (51.9 mg, 73% yield).

**m.p.** 110.1–111.8 °C.

**<sup>1</sup>H NMR** (300 MHz, CDCl<sub>3</sub>) δ 7.67-7.59 (m, 4H), 7.50-7.34 (m, 3H), 7.31 (d, 2H, *J* = 8.2 Hz), 3.68 (s, 3H), 2.48 (q, 3H, *J* = 2.3 Hz).

**<sup>13</sup>C NMR** (101 MHz, CDCl<sub>3</sub>) δ 142.6 (q, *J* = 2.2 Hz), 142.2, 140.0, 139.0 (q, *J* = 31.2 Hz), 130.2, 129.3, 128.8, 127.8, 127.1, 126.7, 122.4 (q, *J* = 278.7 Hz), 56.1, 16.8 (q, *J* = 2.8 Hz).

**<sup>19</sup>F NMR** (282 MHz, CDCl<sub>3</sub>) δ -58.7 (q, *J* = 2.3 Hz).

**HRMS** (ESI) calcd for C<sub>17</sub>H<sub>15</sub>F<sub>3</sub>NaO<sub>3</sub>S<sup>+</sup> [M+Na]<sup>+</sup> 379.0586, found 379.0579.

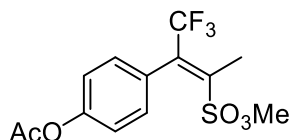

**(E)-4-(1,1,1-Trifluoro-3-(methoxysulfonyl)but-2-en-2-yl)phenyl acetate (3f)**

Following the general procedure A, the crude product was purified by flash chromatography on silica gel (30:1 petroleum ether/EtOAc) to afford **3f** as a white solid (48.5 mg, 72% yield).

**m.p.** 63.4–65.0 °C.

**<sup>1</sup>H NMR** (300 MHz, CDCl<sub>3</sub>) δ 7.26 (d, 2H, *J* = 8.6 Hz), 7.16 (d, 2H, *J* = 8.6 Hz), 3.63 (s, 3H), 2.45 (q, 3H, *J* = 2.4 Hz), 2.31 (s, 3H).

**<sup>13</sup>C NMR** (101 MHz, CDCl<sub>3</sub>) δ 168.9, 151.5, 143.2 (q, *J* = 2.3 Hz), 138.2 (q, *J* = 31.5 Hz), 130.2, 128.7 (q, *J* = 1.2 Hz), 122.2 (q, *J* = 278.7 Hz), 121.4, 56.1, 21.1, 16.7 (q, *J* = 2.8 Hz).

$^{19}\text{F}$  NMR (282 MHz,  $\text{CDCl}_3$ )  $\delta$  -58.7 (q,  $J$  = 2.4 Hz).

HRMS (ESI) calcd for  $\text{C}_{13}\text{H}_{13}\text{F}_3\text{NaO}_5\text{S}^+$   $[\text{M}+\text{Na}]^+$  361.0328, found 361.0324.

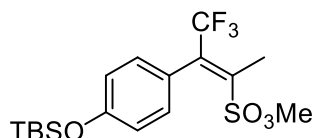

### Methyl

#### **(E)-4,4,4-Trifluoro-3-(4-((tert-butyldimethylsilyl)oxy)phenyl)but-2-ene-2-sulfonate (3g)**

Following the general procedure A, the crude product was purified by flash chromatography on silica gel (60:1 petroleum ether/EtOAc) to afford **3g** as colorless oil (49.1 mg, 60% yield).

$^1\text{H}$  NMR (300 MHz,  $\text{CDCl}_3$ )  $\delta$  7.10 (d, 2H,  $J$  = 8.5 Hz), 6.85 (d, 2H,  $J$  = 8.5 Hz), 3.62 (s, 3H), 2.43 (q, 3H,  $J$  = 2.4 Hz), 0.98 (s, 9H), 0.21 (s, 6H).

$^{13}\text{C}$  NMR (101 MHz,  $\text{CDCl}_3$ )  $\delta$  156.8, 142.3 (q,  $J$  = 2.4 Hz), 139.0 (q,  $J$  = 31.3 Hz), 130.4, 123.9 (q,  $J$  = 1.2 Hz), 122.4 (q,  $J$  = 278.7 Hz), 119.7, 56.0, 25.6, 18.2, 16.7 (q,  $J$  = 2.8 Hz), -4.4.

$^{19}\text{F}$  NMR (282 MHz,  $\text{CDCl}_3$ )  $\delta$  -59.0 (q,  $J$  = 2.4 Hz).

HRMS (ESI) calcd for  $\text{C}_{17}\text{H}_{25}\text{F}_3\text{NaO}_4\text{SSi}^+$   $[\text{M}+\text{Na}]^+$  433.1087, found 433.1081.

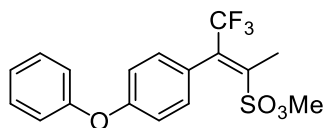

#### **Methyl (E)-4,4,4-Trifluoro-3-(4-phenoxyphenyl)but-2-ene-2-sulfonate (3h)**

Following the general procedure A, the crude product was purified by flash chromatography on silica gel (60:1 petroleum ether/EtOAc) to afford **3h** as a white solid (48.3 mg, 65% yield).

**m.p.** 70.0–71.6 °C.

**<sup>1</sup>H NMR** (300 MHz, CDCl<sub>3</sub>) δ 7.37 (t, 2H, *J* = 7.9 Hz), 7.18 (d, 2H, *J* = 8.5 Hz), 7.16 (t, 1H, *J* = 7.9 Hz), 7.06 (d, 2H, *J* = 7.9 Hz), 7.00 (d, 2H, *J* = 8.5 Hz), 3.70 (s, 3H), 2.45 (q, 3H, *J* = 2.4 Hz).

**<sup>13</sup>C NMR** (101 MHz, CDCl<sub>3</sub>) δ 158.7, 156.1, 142.7 (q, *J* = 2.3 Hz), 138.8 (q, *J* = 31.3 Hz), 130.5, 129.9, 125.5 (q, *J* = 1.1 Hz), 124.0, 122.4 (q, *J* = 278.7 Hz), 119.7, 117.6, 56.1, 16.7 (q, *J* = 2.8 Hz).

**<sup>19</sup>F NMR** (282 MHz, CDCl<sub>3</sub>) δ -59.0 (q, *J* = 2.4 Hz).

**HRMS** (ESI) calcd for C<sub>17</sub>H<sub>15</sub>F<sub>3</sub>NaO<sub>4</sub>S<sup>+</sup> [M+Na]<sup>+</sup> 395.0535, found 395.0530.

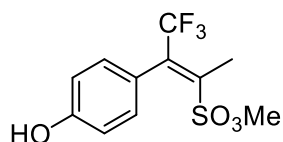

**Methyl (*E*)-4,4,4-Trifluoro-3-(4-hydroxyphenyl)but-2-ene-2-sulfonate (3i)**

Following the general procedure A, the crude product was purified by flash chromatography on silica gel (5:1 petroleum ether/EtOAc) to afford **3i** as a white solid (39.8 mg, 67% yield).

**m.p.** 134.8–136.2 °C.

**<sup>1</sup>H NMR** (300 MHz, CDCl<sub>3</sub>) δ 7.12 (d, 2H, *J* = 8.7 Hz), 6.85 (d, 2H, *J* = 8.7 Hz), 5.20 (s, 1H), 3.67 (s, 3H), 2.44 (q, 3H, *J* = 2.4 Hz).

**<sup>13</sup>C NMR** (101 MHz, CD<sub>3</sub>OD) δ 159.8, 143.6 (q, *J* = 2.3 Hz), 140.4 (q, *J* = 31.1 Hz), 131.7, 124.1 (q, *J* = 277.8 Hz), 123.5, 115.9, 57.4, 17.0 (q, *J* = 2.7 Hz).

**<sup>19</sup>F NMR** (282 MHz, CDCl<sub>3</sub>) δ -59.1 (q, *J* = 2.4 Hz).

**HRMS** (ESI) calcd for C<sub>11</sub>H<sub>11</sub>F<sub>3</sub>NaO<sub>4</sub>S<sup>+</sup> [M+Na]<sup>+</sup> 319.0222, found 319.0219.

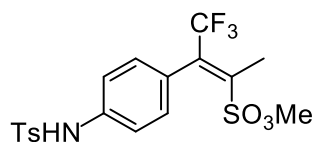

**Methyl**

**(*E*)-4,4,4-Trifluoro-3-(4-((4-methylphenyl)sulfonamido)phenyl)but-2-ene-2-sulfonate (3j)**

Following the general procedure A, the crude product was purified by flash chromatography on silica gel (3:1 petroleum ether/EtOAc) to afford **3j** as a white solid (57.4 mg, 64% yield).

**m.p.** 120.5–122.4 °C.

**<sup>1</sup>H NMR** (300 MHz, CDCl<sub>3</sub>) δ 7.62 (d, 2H, *J* = 8.3 Hz), 7.23 (d, 2H, *J* = 8.3 Hz), 7.14-7.06 (m, 4H), 6.56 (brs, 1H), 3.61 (s, 3H), 2.42 (q, 3H, *J* = 2.4 Hz), 2.38 (s, 3H).

**<sup>13</sup>C NMR** (101 MHz, CDCl<sub>3</sub>) δ 144.1, 143.0 (q, *J* = 2.3 Hz), 138.3 (q, *J* = 31.5 Hz), 137.9, 135.8, 130.0, 129.7, 128.0 (q, *J* = 1.2 Hz), 127.2, 122.2 (q, *J* = 278.7 Hz), 120.6, 56.1, 21.5, 16.7 (q, *J* = 2.8 Hz).

**<sup>19</sup>F NMR** (282 MHz, CDCl<sub>3</sub>) δ -58.9 (q, *J* = 2.4 Hz).

**HRMS** (ESI) calcd for C<sub>18</sub>H<sub>18</sub>F<sub>3</sub>NNaO<sub>5</sub>S<sub>2</sub><sup>+</sup> [M+Na]<sup>+</sup> 472.0471, found 472.0468.

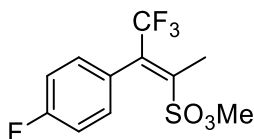

**Methyl (*E*)-4,4,4-Trifluoro-3-(4-fluorophenyl)but-2-ene-2-sulfonate (**3k**)**

Following the general procedure A, the crude product was purified by flash chromatography on silica gel (80:1 petroleum ether/EtOAc) to afford **3k** as a white solid (37.8 mg, 63% yield).

**m.p.** 65.3–66.1 °C.

**<sup>1</sup>H NMR** (300 MHz, CDCl<sub>3</sub>) δ 7.26-7.19 (m, 2H), 7.15-7.07 (m, 2H), 3.69 (s, 3H), 2.45 (q, 3H, *J* = 2.4 Hz).

**<sup>13</sup>C NMR** (101 MHz, CDCl<sub>3</sub>) δ 163.3 (d, *J* = 249.8 Hz), 143.2 (q, *J* = 2.3 Hz), 138.3 (q, *J* = 31.5 Hz), 130.9 (d, *J* = 8.6 Hz), 127.2 (m), 122.2 (q, *J* = 278.7 Hz), 115.4 (d, *J* = 22.0 Hz), 56.1, 16.7 (q, *J* = 2.8 Hz).

**<sup>19</sup>F NMR** (282 MHz, CDCl<sub>3</sub>) δ -58.9 (q, *J* = 2.4 Hz), -110.9 (tt, *J* = 8.2, 5.2 Hz).

**HRMS** (ESI) calcd for C<sub>11</sub>H<sub>10</sub>F<sub>4</sub>NaO<sub>3</sub>S<sup>+</sup> [M+Na]<sup>+</sup> 321.0179, found 321.0179.



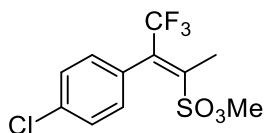

**Methyl (*E*)-4,4,4-Trifluoro-3-(4-chlorophenyl)but-2-ene-2-sulfonate (3l)**

Following the general procedure A, the crude product was purified by flash chromatography on silica gel (80:1 petroleum ether/EtOAc) to afford **3l** as a white solid (47.7 mg, 76% yield).

**m.p.** 68.3–69.9 °C.

**<sup>1</sup>H NMR** (300 MHz, CDCl<sub>3</sub>) δ 7.39 (d, 2H, *J* = 8.4 Hz), 7.17 (d, 2H, *J* = 8.4 Hz), 3.70 (s, 3H), 2.45 (q, 3H, *J* = 2.4 Hz).

**<sup>13</sup>C NMR** (101 MHz, CDCl<sub>3</sub>) δ 143.2 (q, *J* = 2.4 Hz), 138.1 (q, *J* = 31.5 Hz), 135.8, 130.2, 129.7 (q, *J* = 1.1 Hz), 128.5, 122.2 (q, *J* = 278.7 Hz), 56.1, 16.7 (q, *J* = 2.8 Hz).

**<sup>19</sup>F NMR** (282 MHz, CDCl<sub>3</sub>) δ -58.8 (q, *J* = 2.4 Hz).

**HRMS** (ESI) calcd for C<sub>11</sub>H<sub>10</sub>ClF<sub>3</sub>NaO<sub>3</sub>S<sup>+</sup> [M+Na]<sup>+</sup> 336.9883, found 336.9886.

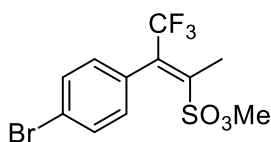

**Methyl (*E*)-4,4,4-Trifluoro-3-(4-bromophenyl)but-2-ene-2-sulfonate (3m)**

Following the general procedure A, the crude product was purified by flash chromatography on silica gel (80:1 petroleum ether/EtOAc) to afford **3m** as a white solid (51.5 mg, 72% yield).

**m.p.** 83.7–85.2 °C.

**<sup>1</sup>H NMR** (300 MHz, CDCl<sub>3</sub>) δ 7.55 (d, 2H, *J* = 8.4 Hz), 7.11 (d, 2H, *J* = 8.4 Hz), 3.70 (s, 3H), 2.45 (q, 3H, *J* = 2.4 Hz).

**<sup>13</sup>C NMR** (101 MHz, CDCl<sub>3</sub>) δ 143.1 (q, *J* = 2.3 Hz), 138.1 (q, *J* = 31.5 Hz), 131.4, 130.5, 130.2 (q, *J* = 1.1 Hz), 124.0, 122.1 (q, *J* = 278.7 Hz), 56.2, 16.7 (q, *J* = 2.8 Hz).

**<sup>19</sup>F NMR** (282 MHz, CDCl<sub>3</sub>) δ -58.8 (q, *J* = 2.4 Hz).

**HRMS** (EI) calcd for C<sub>11</sub>H<sub>10</sub>BrF<sub>3</sub>O<sub>3</sub>S<sup>+</sup> [M]<sup>+</sup> 357.9481, found 357.9500.

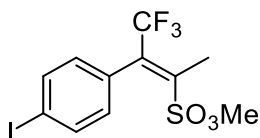

**Methyl (*E*)-4,4,4-Trifluoro-3-(4-iodophenyl)but-2-ene-2-sulfonate (3n)**

Following the general procedure A, the crude product was purified by flash chromatography on silica gel (80:1 petroleum ether/EtOAc) to afford **3n** as a white solid (54.7 mg, 67% yield).

**m.p.** 106.5–108.1 °C.

**<sup>1</sup>H NMR** (300 MHz, CDCl<sub>3</sub>) δ 7.75 (d, 2H, *J* = 8.4 Hz), 6.98 (d, 2H, *J* = 8.4 Hz), 3.70 (s, 3H), 2.44 (q, 3H, *J* = 2.4 Hz).

**<sup>13</sup>C NMR** (101 MHz, CDCl<sub>3</sub>) δ 143.1 (q, *J* = 2.3 Hz), 138.2 (q, *J* = 31.5 Hz), 137.3, 130.9 (q, *J* = 1.3 Hz), 130.5, 122.0 (q, *J* = 278.7 Hz), 95.8, 56.2, 16.7 (q, *J* = 2.8 Hz).

**<sup>19</sup>F NMR** (282 MHz, CDCl<sub>3</sub>) δ -58.8 (q, *J* = 2.4 Hz).

**HRMS** (ESI) calcd for C<sub>11</sub>H<sub>10</sub>F<sub>3</sub>INaO<sub>3</sub>S<sup>+</sup> [M+Na]<sup>+</sup> 428.9240, found 428.9242.

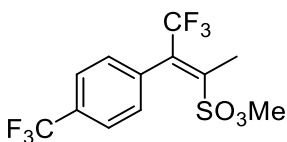

**Methyl**

**(*E*)-4,4,4-Trifluoro-3-(4-trifluoromethylphenyl)but-2-ene-2-sulfonate (3o)**

Following the general procedure A, the crude product was purified by flash chromatography on silica gel (80:1 petroleum ether/EtOAc) to afford **3o** as a white solid (40.6 mg, 58% yield).

**m.p.** 61.7–63.0 °C.

**<sup>1</sup>H NMR** (300 MHz, CDCl<sub>3</sub>) δ 7.68 (d, 2H, *J* = 8.2 Hz), 7.37 (d, 2H, *J* = 8.2 Hz), 3.72 (s, 3H), 2.48 (q, 3H, *J* = 2.4 Hz).

**<sup>13</sup>C NMR** (101 MHz, CDCl<sub>3</sub>) δ 143.5 (q, *J* = 2.4 Hz), 137.9 (q, *J* = 31.8 Hz), 135.1 (m), 131.5 (q, *J* = 32.8 Hz), 129.4, 125.2 (q, *J* = 3.8 Hz), 123.7 (q, *J* = 272.5 Hz), 122.1 (q, *J* = 278.7 Hz), 56.2, 16.7 (q, *J* = 2.8 Hz).

**<sup>19</sup>F NMR** (282 MHz, CDCl<sub>3</sub>) δ -58.6 (q, *J* = 2.4 Hz), -62.9.

**HRMS** (ESI) calcd for C<sub>12</sub>H<sub>10</sub>F<sub>6</sub>NaO<sub>3</sub>S<sup>+</sup> [M+Na]<sup>+</sup> 371.0147, found 371.0138.

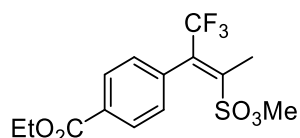

**Ethyl (E)-4-(1,1,1-Trifluoro-3-(methoxysulfonyl)but-2-en-2-yl)benzoate (3p)**

Following the general procedure A, the crude product was purified by flash chromatography on silica gel (25:1 petroleum ether/EtOAc) to afford **3p** as a white solid (44.4 mg, 63% yield).

**m.p.** 79.2–80.6 °C.

**<sup>1</sup>H NMR** (300 MHz, CDCl<sub>3</sub>) δ 8.09 (d, 2H, *J* = 8.3 Hz), 7.32 (d, 2H, *J* = 8.3 Hz), 4.39 (q, 2H, *J* = 7.2 Hz), 3.69 (s, 3H), 2.47 (q, 3H, *J* = 2.4 Hz), 1.40 (t, 3H, *J* = 7.2 Hz).

**<sup>13</sup>C NMR** (101 MHz, CDCl<sub>3</sub>) δ 165.8, 143.1 (q, *J* = 2.4 Hz), 138.4 (q, *J* = 31.2 Hz), 135.9 (q, *J* = 1.2 Hz), 131.4, 129.3, 128.9, 122.1 (q, *J* = 278.7 Hz), 61.2, 56.1, 16.7 (q, *J* = 2.8 Hz), 14.3.

**<sup>19</sup>F NMR** (282 MHz, CDCl<sub>3</sub>) δ -58.6 (q, *J* = 2.4 Hz).

**HRMS** (ESI) calcd for C<sub>14</sub>H<sub>15</sub>F<sub>3</sub>NaO<sub>5</sub>S<sup>+</sup> [M+Na]<sup>+</sup> 375.0484, found 375.0481.

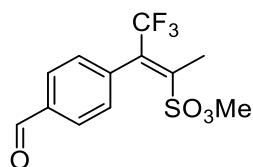

**Methyl (E)-4,4,4-Trifluoro-3-(4-formylphenyl)but-2-ene-2-sulfonate (3q)**

Following the general procedure A, the crude product was purified by flash chromatography on silica gel (25:1 petroleum ether/EtOAc) to afford **3q** as a white solid (32.6 mg, 53% yield).

**m.p.** 94.5–95.9 °C.

**<sup>1</sup>H NMR** (300 MHz, CDCl<sub>3</sub>) δ 10.06 (s, 1H), 7.94 (d, 2H, *J* = 8.2 Hz), 7.42 (d, 2H, *J* = 8.2 Hz), 3.73 (s, 3H), 2.48 (q, 3H, *J* = 2.4 Hz).

**<sup>13</sup>C NMR** (101 MHz, CDCl<sub>3</sub>) δ 191.4, 143.4 (q, *J* = 2.3 Hz), 138.0 (q, *J* = 31.2 Hz), 137.4 (q, *J* = 1.2 Hz), 136.7, 129.6, 129.3, 122.0 (q, *J* = 278.7 Hz), 56.2, 16.6 (q, *J* = 2.8 Hz).

**<sup>19</sup>F NMR** (282 MHz, CDCl<sub>3</sub>) δ -58.5 (q, *J* = 2.4 Hz).

**HRMS** (ESI) calcd for C<sub>12</sub>H<sub>12</sub>F<sub>3</sub>O<sub>4</sub>S<sup>+</sup> [M+H]<sup>+</sup> 309.0403, found 309.0402.

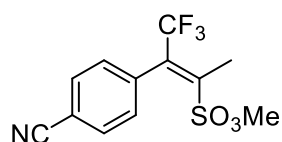

**Methyl (*E*)-4,4,4-Trifluoro-3-(4-cyanophenyl)but-2-ene-2-sulfonate (**3r**)**

Following the general procedure B, the crude product was purified by flash chromatography on silica gel (25:1 petroleum ether/EtOAc) to afford **3r** as colorless oil (31.6 mg, 52% yield).

**<sup>1</sup>H NMR** (300 MHz, CDCl<sub>3</sub>) δ 7.71 (d, 2H, *J* = 8.4 Hz), 7.36 (d, 2H, *J* = 8.4 Hz), 3.75 (s, 3H), 2.48 (q, 3H, *J* = 2.4 Hz).

**<sup>13</sup>C NMR** (101 MHz, CDCl<sub>3</sub>) δ 143.9 (q, *J* = 2.4 Hz), 137.3 (q, *J* = 32.1 Hz), 136.1 (q, *J* = 1.1 Hz), 131.9, 129.7, 121.9 (q, *J* = 278.7 Hz), 118.0, 113.5, 56.3, 16.6 (q, *J* = 2.7 Hz).

**<sup>19</sup>F NMR** (282 MHz, CDCl<sub>3</sub>) δ -58.5 (q, *J* = 2.4 Hz).

**HRMS** (ESI) calcd for C<sub>12</sub>H<sub>11</sub>F<sub>3</sub>NO<sub>3</sub>S<sup>+</sup> [M+H]<sup>+</sup> 306.0406, found 306.0407.

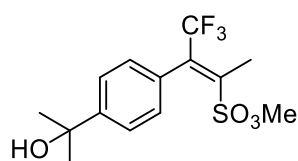

## Methyl

### (*E*)-4,4,4-Trifluoro-3-(4-(2-hydroxypropan-2-yl)phenyl)but-2-ene-2-sulfonate (**3s**)

Following the general procedure A, the crude product was purified by flash chromatography on silica gel (10:1 petroleum ether/EtOAc) to afford **3s** as a white solid (50.8 mg, 75% yield).

**m.p.** 78.0–79.5 °C.

**<sup>1</sup>H NMR** (300 MHz, CDCl<sub>3</sub>) δ 7.53 (d, 2H, *J* = 8.4 Hz), 7.21 (d, 2H, *J* = 8.4 Hz), 3.65 (s, 3H), 2.45 (q, 3H, *J* = 2.4 Hz), 1.77 (brs, 1H), 1.60 (s, 6H).

**<sup>13</sup>C NMR** (101 MHz, CDCl<sub>3</sub>) δ 150.5, 142.4 (q, *J* = 2.3 Hz), 139.2 (q, *J* = 31.2 Hz), 129.7 (q, *J* = 1.2 Hz), 128.7, 124.2, 122.3 (q, *J* = 278.7 Hz), 72.4, 56.1, 31.6, 16.7 (q, *J* = 2.8 Hz).

**<sup>19</sup>F NMR** (282 MHz, CDCl<sub>3</sub>) δ -58.8 (q, *J* = 2.4 Hz).

**HRMS** (ESI) calcd for C<sub>14</sub>H<sub>17</sub>F<sub>3</sub>NaO<sub>4</sub>S<sup>+</sup> [M+Na]<sup>+</sup> 361.0692, found 361.0689.

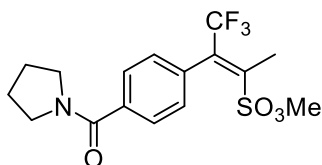

## Methyl

### (*E*)-4,4,4-Trifluoro-3-(4-(pyrrolidine-1-carbonyl)phenyl)but-2-ene-2-sulfonate (**3t**)

Following the general procedure A, the crude product was purified by flash chromatography on silica gel (3:1 petroleum ether/EtOAc) to afford **3t** as colorless oil (53.3 mg, 71% yield).

**<sup>1</sup>H NMR** (300 MHz, CDCl<sub>3</sub>) δ 7.56 (d, 2H, *J* = 8.2 Hz), 7.27 (d, 2H, *J* = 8.2 Hz), 3.68 (s, 3H), 3.65 (t, 2H, *J* = 6.8 Hz), 3.43 (t, 2H, *J* = 6.8 Hz), 2.46 (q, 3H, *J* = 2.5 Hz), 2.01-1.92 (m, 2H), 1.92-1.83 (m, 2H).

**<sup>13</sup>C NMR** (101 MHz, CDCl<sub>3</sub>) δ 168.7, 142.9 (q, *J* = 2.4 Hz), 138.5 (q, *J* = 31.5 Hz), 138.1, 132.8 (q, *J* = 1.2 Hz), 128.8, 126.9, 122.1 (q, *J* = 278.7 Hz), 56.2, 49.6, 46.2, 26.4, 24.4, 16.6 (q, *J* = 2.8 Hz).

**<sup>19</sup>F NMR** (282 MHz, CDCl<sub>3</sub>) δ -58.6 (q, *J* = 2.5 Hz).

**HRMS** (ESI) calcd for C<sub>16</sub>H<sub>19</sub>F<sub>3</sub>NO<sub>4</sub>S<sup>+</sup> [M+H]<sup>+</sup> 378.0981, found 378.0975.

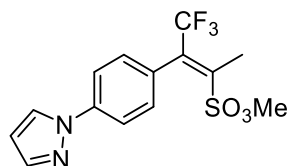

### Methyl

#### **(E)-4,4,4-Trifluoro-3-(4-(1H-pyrazol-1-yl)phenyl)but-2-ene-2-sulfonate (3u)**

Following the general procedure A, the crude product was purified by flash chromatography on silica gel (25:1 petroleum ether/EtOAc) to afford **3u** as a white solid (48.3 mg, 70% yield).

**m.p.** 101.5–103.7 °C.

**<sup>1</sup>H NMR** (300 MHz, CDCl<sub>3</sub>) δ 7.98 (dd, 1H, *J* = 2.5, 0.5 Hz), 7.77 (d, 2H, *J* = 8.7 Hz), 7.74 (dd, 1H, *J* = 1.9, 0.5 Hz), 7.34 (d, 2H, *J* = 8.7 Hz), 6.49 (dd, 1H, *J* = 2.5, 1.9 Hz), 3.70 (s, 3H), 2.47 (q, 3H, *J* = 2.4 Hz).

**<sup>13</sup>C NMR** (101 MHz, CDCl<sub>3</sub>) δ 143.1 (q, *J* = 2.4 Hz), 141.5, 140.8, 138.3 (q, *J* = 31.6 Hz), 130.2, 129.1 (q, *J* = 1.2 Hz), 126.7, 122.2 (q, *J* = 278.7 Hz), 118.4, 108.1, 56.2, 16.7 (q, *J* = 2.8 Hz).

**<sup>19</sup>F NMR** (282 MHz, CDCl<sub>3</sub>) δ -58.8 (q, *J* = 2.4 Hz).

**HRMS** (ESI) calcd for C<sub>14</sub>H<sub>13</sub>F<sub>3</sub>N<sub>2</sub>NaO<sub>3</sub>S<sup>+</sup> [M+Na]<sup>+</sup> 369.0491, found 369.0487.

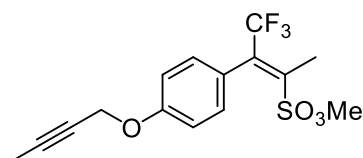

### Methyl

#### **(E)-4,4,4-Trifluoro-3-(4-(but-2-yn-1-yloxy)phenyl)but-2-ene-2-sulfonate**

**(3v)**

Following the general procedure A, the crude product was purified by flash chromatography on silica gel (60:1 petroleum ether/EtOAc) to afford **3v** as colorless oil (36.8 mg, 53% yield).

**<sup>1</sup>H NMR** (300 MHz, CDCl<sub>3</sub>) δ 7.17 (d, 2H, *J* = 8.7 Hz), 6.98 (d, 2H, *J* = 8.7 Hz), 4.67 (q, 2H, *J* = 2.4 Hz), 3.65 (s, 3H), 2.44 (q, 3H, *J* = 2.5 Hz), 1.87 (t, 3H, *J* = 2.4 Hz).

**<sup>13</sup>C NMR** (101 MHz, CDCl<sub>3</sub>) δ 158.7, 142.4 (q, *J* = 2.4 Hz), 138.9 (q, *J* = 31.3 Hz), 130.3, 123.8 (q, *J* = 1.2 Hz), 122.4 (q, *J* = 278.7 Hz), 114.4, 84.1, 73.6, 56.5, 56.1, 16.7 (q, *J* = 2.8 Hz), 3.6.

**<sup>19</sup>F NMR** (282 MHz, CDCl<sub>3</sub>) δ -59.0 (q, *J* = 2.5 Hz).

**HRMS** (ESI) calcd for C<sub>15</sub>H<sub>15</sub>F<sub>3</sub>NaO<sub>4</sub>S<sup>+</sup> [M+Na]<sup>+</sup> 371.0535, found 371.0531.

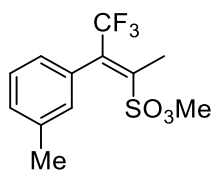

### **Methyl (*E*)-4,4,4-Trifluoro-3-(*m*-tolyl)but-2-ene-2-sulfonate (**3w**)**

Following the general procedure A, the crude product was purified by flash chromatography on silica gel (80:1 petroleum ether/EtOAc) to afford **3w** as a white solid (38.2 mg, 65% yield).

**m.p.** 58.3–59.6 °C.

**<sup>1</sup>H NMR** (300 MHz, CDCl<sub>3</sub>) δ 7.33-7.21 (m, 2H), 7.06-7.00 (m, 2H), 3.65 (s, 3H), 2.44 (q, 3H, *J* = 2.4 Hz), 2.38 (s, 3H).

**<sup>13</sup>C NMR** (101 MHz, CDCl<sub>3</sub>) δ 142.1 (q, *J* = 2.4 Hz), 139.4 (q, *J* = 31.2 Hz), 137.8, 131.3 (q, *J* = 1.2 Hz), 130.2, 129.3, 127.9, 125.9, 122.4 (q, *J* = 278.7 Hz), 56.0, 21.4, 16.7 (q, *J* = 2.8 Hz).

**<sup>19</sup>F NMR** (282 MHz, CDCl<sub>3</sub>) δ -58.8 (q, *J* = 2.4 Hz).

**HRMS** (ESI) calcd for C<sub>12</sub>H<sub>13</sub>F<sub>3</sub>NaO<sub>3</sub>S<sup>+</sup> [M+Na]<sup>+</sup> 317.0430, found 317.0428.

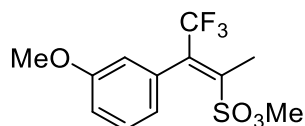

**Methyl (*E*)-4,4,4-Trifluoro-3-(3-methoxyphenyl)but-2-ene-2-sulfonate (3x)**

Following the general procedure A, the crude product was purified by flash chromatography on silica gel (60:1 petroleum ether/EtOAc) to afford **3x** as a white solid (42.9 mg, 69% yield).

**m.p.** 50.2–51.4 °C.

**<sup>1</sup>H NMR** (300 MHz, CDCl<sub>3</sub>) δ 7.32 (dd, 1H, *J* = 8.4, 7.6 Hz), 6.96 (ddd, 1H, *J* = 8.4, 2.5, 0.8 Hz), 6.82 (d, 1H, *J* = 7.6 Hz), 6.79-6.75 (m, 1H), 3.82 (s, 3H), 3.67 (s, 3H), 2.45 (q, 3H, *J* = 2.5 Hz).

**<sup>13</sup>C NMR** (101 MHz, CDCl<sub>3</sub>) δ 159.1, 142.4 (q, *J* = 2.2 Hz), 138.9 (q, *J* = 31.5 Hz), 132.5 (q, *J* = 1.2 Hz), 129.2, 122.3 (q, *J* = 278.7 Hz), 121.1, 114.80, 114.78, 56.1, 55.3, 16.7 (q, *J* = 2.8 Hz).

**<sup>19</sup>F NMR** (282 MHz, CDCl<sub>3</sub>) δ -58.8 (q, *J* = 2.5 Hz).

**HRMS** (ESI) calcd for C<sub>12</sub>H<sub>13</sub>F<sub>3</sub>NaO<sub>4</sub>S<sup>+</sup> [M+Na]<sup>+</sup> 333.0379, found 333.0378.

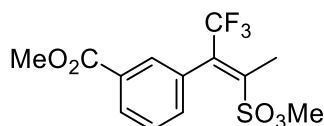

**Methyl (*E*)-3-(1,1,1-Trifluoro-3-(methoxysulfonyl)but-2-en-2-yl)benzoate (3y)**

Following the general procedure B, the crude product was purified by flash chromatography on silica gel (30:1 petroleum ether/EtOAc) to afford **3y** as a white solid (47.1 mg, 70% yield).

**m.p.** 52.2–53.4 °C.

**<sup>1</sup>H NMR** (300 MHz, CDCl<sub>3</sub>) δ 8.11 (d, 1H, *J* = 7.5 Hz), 7.92 (s, 1H), 7.50 (dd, 1H, *J* = 7.9, 7.5 Hz), 7.43 (d, 1H, *J* = 7.9 Hz), 3.92 (s, 3H), 3.69 (s, 3H), 2.47 (q, 3H, *J* = 2.4 Hz).



**<sup>13</sup>C NMR** (101 MHz, CDCl<sub>3</sub>) δ 166.2, 143.3 (q, *J* = 2.4 Hz), 138.3 (q, *J* = 31.5 Hz), 133.3, 131.7 (q, *J* = 1.2 Hz), 130.5, 130.2, 129.9, 128.3, 122.2 (q, *J* = 278.7 Hz), 56.1, 52.3, 16.7 (q, *J* = 2.8 Hz).

**<sup>19</sup>F NMR** (282 MHz, CDCl<sub>3</sub>) δ -58.7 (q, *J* = 2.4 Hz).

**HRMS** (ESI) calcd for C<sub>13</sub>H<sub>13</sub>F<sub>3</sub>NaO<sub>5</sub>S<sup>+</sup> [M+Na]<sup>+</sup> 361.0328, found 361.0326.

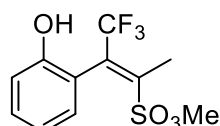

**Methyl (*E*)-4,4,4-Trifluoro-3-(2-hydroxyphenyl)but-2-ene-2-sulfonate (3z)**

Following the general procedure A, the crude product was purified by flash chromatography on silica gel (5:1 petroleum ether/EtOAc) to afford **3z** as colorless oil (40.5 mg, 68% yield).

**<sup>1</sup>H NMR** (300 MHz, CDCl<sub>3</sub>) δ 7.30 (ddd, 1H, *J* = 8.2, 8.0, 1.6 Hz), 7.11 (dd, 1H, *J* = 7.6, 1.6 Hz), 6.98 (ddd, 1H, *J* = 8.0, 7.6, 0.8 Hz), 6.81 (dd, 1H, *J* = 8.2, 0.8 Hz), 5.17 (brs, 1H), 3.73 (s, 3H), 2.46 (q, 3H, *J* = 2.3 Hz).

**<sup>13</sup>C NMR** (101 MHz, CDCl<sub>3</sub>) δ 153.0, 142.9 (q, *J* = 2.4 Hz), 137.2 (q, *J* = 32.7 Hz), 131.1, 130.5, 122.2 (q, *J* = 278.7 Hz), 120.5, 119.2 (q, *J* = 2.3 Hz), 115.5, 56.7, 16.6 (q, *J* = 2.5 Hz).

**<sup>19</sup>F NMR** (282 MHz, CDCl<sub>3</sub>) δ -59.9 (q, *J* = 2.3 Hz).

**HRMS** (ESI) calcd for C<sub>11</sub>H<sub>11</sub>F<sub>3</sub>NaO<sub>4</sub>S<sup>+</sup> [M+Na]<sup>+</sup> 319.0222, found 319.0220.

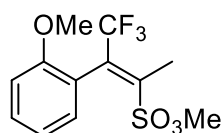

**Methyl (*E*)-4,4,4-Trifluoro-3-(2-methoxyphenyl)but-2-ene-2-sulfonate (3aa)**

Following the general procedure A, the crude product was purified by flash chromatography on silica gel (60:1 petroleum ether/EtOAc) to afford **3aa** as colorless oil (26.5 mg, 43% yield).

**<sup>1</sup>H NMR** (300 MHz, CDCl<sub>3</sub>) δ 7.41 (ddd, 1H, *J* = 8.3, 7.5, 1.7 Hz), 7.13 (dd, 1H, *J* = 7.5, 1.7 Hz), 6.99 (ddd, 1H, *J* = 8.3, 7.5, 0.9 Hz), 6.93 (dd, 1H, *J* = 8.3, 0.9 Hz), 3.83 (s, 3H), 3.69 (s, 3H), 2.44 (q, 3H, *J* = 2.4 Hz).

**<sup>13</sup>C NMR** (101 MHz, CDCl<sub>3</sub>) δ 156.9, 142.2 (q, *J* = 2.4 Hz), 137.6 (q, *J* = 32.1 Hz), 131.1, 130.5, 122.1 (q, *J* = 278.7 Hz), 120.9 (q, *J* = 1.1 Hz), 120.3, 110.4, 56.4, 55.6, 16.5 (q, *J* = 2.5 Hz).

**<sup>19</sup>F NMR** (282 MHz, CDCl<sub>3</sub>) δ -60.2 (q, *J* = 2.4 Hz).

**HRMS** (ESI) calcd for C<sub>12</sub>H<sub>13</sub>F<sub>3</sub>NaO<sub>4</sub>S<sup>+</sup> [M+Na]<sup>+</sup> 333.0379, found 333.0378.

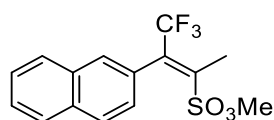

**Methyl (*E*)-4,4,4-Trifluoro-3-(naphthalen-2-yl)but-2-ene-2-sulfonate (3ab)**

Following the general procedure A, the crude product was purified by flash chromatography on silica gel (60:1 petroleum ether/EtOAc) to afford **3ab** as a white solid (35.6 mg, 54% yield).

**m.p.** 90.2–91.7 °C.

**<sup>1</sup>H NMR** (300 MHz, CDCl<sub>3</sub>) δ 7.92-7.83 (m, 3H), 7.74 (d, 1H, *J* = 1.4 Hz), 7.58-7.49 (m, 2H), 7.31 (dd, 1H, *J* = 8.6, 1.4 Hz), 3.62 (s, 3H), 2.51 (q, 3H, *J* = 2.4 Hz).

**<sup>13</sup>C NMR** (101 MHz, CDCl<sub>3</sub>) δ 142.8 (q, *J* = 2.4 Hz), 139.2 (q, *J* = 31.5 Hz), 133.3, 132.5, 128.80 (q, *J* = 1.2 Hz), 128.76, 128.3, 127.8, 127.1, 126.7, 125.8, 122.5 (q, *J* = 278.7 Hz), 56.1, 16.8 (q, *J* = 2.8 Hz).

**<sup>19</sup>F NMR** (282 MHz, CDCl<sub>3</sub>) δ -58.6 (q, *J* = 2.4 Hz).

**HRMS** (ESI) calcd for C<sub>15</sub>H<sub>13</sub>F<sub>3</sub>NaO<sub>3</sub>S<sup>+</sup> [M+Na]<sup>+</sup> 353.0430, found 353.0429.

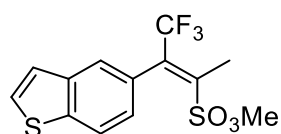

**Methyl (*E*)-4,4,4-Trifluoro-3-(benzo[b]thiophen-5-yl)but-2-ene-2-sulfonate (3ac)**

Following the general procedure A, the crude product was purified by flash chromatography on silica gel (25:1 petroleum ether/EtOAc) to afford **3ac** as a white solid (38.9 mg, 58% yield).

**m.p.** 101.2–102.9 °C.

**<sup>1</sup>H NMR** (300 MHz, CDCl<sub>3</sub>) δ 7.91 (d, 1H, *J* = 8.4 Hz), 7.71 (d, 1H, *J* = 1.1 Hz), 7.51 (d, 1H, *J* = 5.4 Hz), 7.36 (d, 1H, *J* = 5.4 Hz), 7.19 (dd, 1H, *J* = 8.4, 1.1 Hz), 3.64 (s, 3H), 2.49 (q, 3H, *J* = 2.4 Hz).

**<sup>13</sup>C NMR** (101 MHz, CDCl<sub>3</sub>) δ 142.7 (q, *J* = 2.4 Hz), 140.7, 139.2 (q, *J* = 31.5 Hz), 139.1, 127.6, 127.3 (q, *J* = 1.2 Hz), 124.4, 124.2, 123.9, 122.4 (q, *J* = 278.7 Hz), 122.2, 56.1, 16.7 (q, *J* = 2.8 Hz).

**<sup>19</sup>F NMR** (282 MHz, CDCl<sub>3</sub>) δ -58.7 (q, *J* = 2.4 Hz).

**HRMS** (ESI) calcd for C<sub>13</sub>H<sub>11</sub>F<sub>3</sub>NaO<sub>3</sub>S<sub>2</sub><sup>+</sup> [M+Na]<sup>+</sup> 358.9994, found 358.9993.

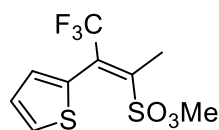

**Methyl (Z)-4,4,4-Trifluoro-3-(thiophen-2-yl)but-2-ene-2-sulfonate (3ad)**

Following the general procedure A, the crude product was purified by flash chromatography on silica gel (60:1 petroleum ether/EtOAc) to afford **3ad** as a colorless oil (30.2 mg, 53% yield).

**<sup>1</sup>H NMR** (300 MHz, CDCl<sub>3</sub>) δ 7.53 (dd, 1H, *J* = 5.0, 1.2 Hz), 7.12 (dd, 1H, *J* = 3.7, 1.2 Hz), 7.07 (dd, 1H, *J* = 5.0, 3.7 Hz), 3.74 (s, 3H), 2.46 (q, 3H, *J* = 2.5 Hz).

**<sup>13</sup>C NMR** (101 MHz, CDCl<sub>3</sub>) δ 145.7 (q, *J* = 2.1 Hz), 132.5 (q, *J* = 32.7 Hz), 131.3, 129.8 (q, *J* = 1.2 Hz), 129.1, 126.8, 121.7 (q, *J* = 278.7 Hz), 56.5, 17.2 (q, *J* = 2.9 Hz).

**<sup>19</sup>F NMR** (282 MHz, CDCl<sub>3</sub>) δ -59.8 (q, *J* = 2.5 Hz).

**HRMS** (ESI) calcd for C<sub>9</sub>H<sub>9</sub>F<sub>3</sub>NaO<sub>3</sub>S<sub>2</sub><sup>+</sup> [M+Na]<sup>+</sup> 308.9837, found 308.9837.

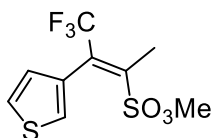

**Methyl (*E*)-4,4,4-Trifluoro-3-(thiophen-3-yl)but-2-ene-2-sulfonate (3ae)**

Following the general procedure A, the crude product was purified by flash chromatography on silica gel (60:1 petroleum ether/EtOAc) to afford **3ae** as a white solid (33.7 mg, 59% yield).

**m.p.** 53.1–54.3 °C.

**<sup>1</sup>H NMR** (300 MHz, CDCl<sub>3</sub>) δ 7.40-7.36 (m, 2H), 7.04-7.00 (m, 1H), 3.68 (s, 3H), 2.44 (q, 3H, *J* = 2.5 Hz).

**<sup>13</sup>C NMR** (101 MHz, CDCl<sub>3</sub>) δ 143.4 (q, *J* = 2.4 Hz), 134.5 (q, *J* = 32.1 Hz), 130.0 (q, *J* = 1.2 Hz), 127.9, 127.4, 125.6, 122.1 (q, *J* = 278.7 Hz), 56.2, 16.9 (q, *J* = 2.9 Hz).

**<sup>19</sup>F NMR** (282 MHz, CDCl<sub>3</sub>) δ -59.6 (q, *J* = 2.5 Hz).

**HRMS** (ESI) calcd for C<sub>9</sub>H<sub>9</sub>F<sub>3</sub>NaO<sub>3</sub>S<sub>2</sub><sup>+</sup> [M+Na]<sup>+</sup> 308.9837, found 308.9838.

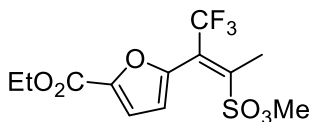

**Ethyl (*E*)-5-(1,1,1-Trifluoro-3-(methoxysulfonyl)but-2-en-2-yl)furan-2-carboxylate (3af)**

Following the general procedure A, the crude product was purified by flash chromatography on silica gel (10:1 petroleum ether/EtOAc) to afford **3af** as a white solid (48.8 mg, 71% yield).

**m.p.** 36.9–38.1 °C.

**<sup>1</sup>H NMR** (300 MHz, CDCl<sub>3</sub>) δ 7.21 (d, 1H, *J* = 3.6 Hz), 6.66 (d, 1H, *J* = 3.6 Hz), 4.36 (q, 2H, *J* = 7.2 Hz), 3.90 (s, 3H), 2.47 (q, 3H, *J* = 2.4 Hz), 1.37 (t, 3H, *J* = 7.2 Hz).

**<sup>13</sup>C NMR** (101 MHz, CDCl<sub>3</sub>) δ 158.2, 148.2 (q, *J* = 2.0 Hz), 146.0, 144.7 (q, *J* = 1.5 Hz), 127.9 (q, *J* = 34.1 Hz), 121.4 (q, *J* = 278.7 Hz), 118.5, 115.6, 61.3, 57.5, 16.9 (q, *J* = 2.5 Hz), 14.2.

**<sup>19</sup>F NMR** (282 MHz, CDCl<sub>3</sub>) δ -59.7 (q, *J* = 2.4 Hz).

**HRMS** (ESI) calcd for C<sub>12</sub>H<sub>13</sub>F<sub>3</sub>NaO<sub>6</sub>S<sup>+</sup> [M+Na]<sup>+</sup> 365.0277, found 365.0273.

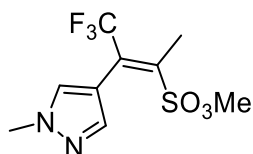

### **Methyl**

### **(E)-4,4,4-Trifluoro-3-(1-methyl-1H-pyrazol-4-yl)but-2-ene-2-sulfonate**

### **(3ag)**

Following the general procedure A, the crude product was purified by flash chromatography on silica gel (3:1 petroleum ether/EtOAc) to afford **3ag** as a white solid (35.2 mg, 62% yield).

**m.p.** 173.1 °C (dec.)

**<sup>1</sup>H NMR** (300 MHz, CDCl<sub>3</sub>) δ 7.54 (s, 1H), 7.50 (s, 1H), 3.93 (s, 3H), 3.70 (s, 3H), 2.41 (q, 3H, *J* = 2.6 Hz); (300 MHz, CD<sub>3</sub>OD) δ 8.32 (s, 2H), 4.14 (s, 6H), 2.40 (q, 3H, *J* = 2.7 Hz).

**<sup>13</sup>C NMR** (101 MHz, CD<sub>3</sub>OD) δ 157.7 (q, *J* = 2.4 Hz), 139.2, 124.3 (q, *J* = 276.1 Hz), 118.8 (q, *J* = 32.2 Hz), 115.6 (q, *J* = 1.8 Hz), 37.1, 17.9 (q, *J* = 2.7 Hz).

**<sup>19</sup>F NMR** (282 MHz, CDCl<sub>3</sub>) δ -60.1 (q, *J* = 2.6 Hz).

**HRMS** (ESI) calcd for C<sub>9</sub>H<sub>12</sub>F<sub>3</sub>N<sub>2</sub>O<sub>3</sub>S<sup>+</sup> [M+H]<sup>+</sup> 285.0515, found 285.0512.

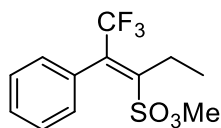

### **Methyl (E)-1,1,1-Trifluoro-2-phenylpent-2-ene-3-sulfonate (3ah)**

Following the general procedure A, the crude product was purified by flash chromatography on silica gel (80:1 petroleum ether/EtOAc) to afford **3ah** as a white solid (40.8 mg, 69% yield).

**m.p.** 60.1–62.0 °C.

**<sup>1</sup>H NMR** (300 MHz, CDCl<sub>3</sub>) δ 7.45–7.37 (m, 3H), 7.29–7.22 (m, 2H), 3.56 (s, 3H), 2.85 (qq, 2H, *J* = 7.3, 1.7 Hz), 1.37 (t, 3H, *J* = 7.3 Hz).

**<sup>13</sup>C NMR** (101 MHz, CDCl<sub>3</sub>) δ 149.0 (q, *J* = 2.5 Hz), 138.7 (q, *J* = 31.2 Hz), 131.6 (q, *J* = 1.2 Hz), 129.4, 128.9, 128.0, 122.5 (q, *J* = 278.7 Hz), 55.7, 24.5 (q, *J* = 2.6 Hz), 14.2.

**<sup>19</sup>F NMR** (282 MHz, CDCl<sub>3</sub>) δ -58.2.

**HRMS** (ESI) calcd for C<sub>12</sub>H<sub>13</sub>F<sub>3</sub>NaO<sub>3</sub>S<sup>+</sup> [M+Na]<sup>+</sup> 317.0430, found 317.0428.

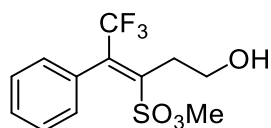

**Methyl (*E*)-1,1,1-Trifluoro-5-hydroxy-2-phenylpent-2-ene-3-sulfonate (3ai)**

Following the general procedure A, the crude product was purified by flash chromatography on silica gel (10:1 petroleum ether/EtOAc) to afford **3ai** as a white solid (43.4 mg, 70% yield).

**m.p.** 67.2–70.1 °C.

**<sup>1</sup>H NMR** (300 MHz, CDCl<sub>3</sub>) δ 7.47–7.38 (m, 3H), 7.30–7.24 (m, 2H), 4.01 (dt, 2H, *J* = 6.7, 6.3 Hz), 3.57 (s, 3H), 3.13 (tq, 2H, *J* = 6.7, 1.7 Hz), 1.89 (t, 1H, *J* = 6.3 Hz).

**<sup>13</sup>C NMR** (101 MHz, CDCl<sub>3</sub>) δ 144.2 (q, *J* = 2.2 Hz), 140.9 (q, *J* = 31.3 Hz), 131.4 (q, *J* = 1.2 Hz), 129.5, 128.9, 128.0, 122.3 (q, *J* = 278.7 Hz), 61.4 (q, *J* = 1.5 Hz), 56.0, 33.9 (q, *J* = 2.9 Hz).

**<sup>19</sup>F NMR** (282 MHz, CDCl<sub>3</sub>) δ -58.3.

**HRMS** (ESI) calcd for C<sub>12</sub>H<sub>13</sub>F<sub>3</sub>NaO<sub>4</sub>S<sup>+</sup> [M+Na]<sup>+</sup> 333.0379, found 333.0377.

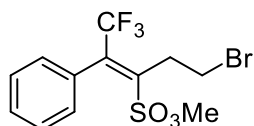

**Methyl (*E*)-5-Bromo-1,1,1-trifluoro-2-phenylpent-2-ene-3-sulfonate (3aj)**

Following the general procedure A, the crude product was purified by flash chromatography on silica gel (30:1 petroleum ether/EtOAc) to afford **3aj** as a white solid (47.6 mg, 64% yield).

**m.p.** 69.1–70.8 °C.

**<sup>1</sup>H NMR** (300 MHz, CDCl<sub>3</sub>) (major *E*-isomer) δ 7.47-7.39 (m, 3H), 7.29-7.22 (m, 2H), 3.66 (t, 2H, *J* = 8.0 Hz), 3.58 (s, 3H), 3.36 (tq, 2H, *J* = 8.0, 1.3 Hz); (minor *Z*-isomer) δ 7.52-7.45 (m, 3H), 7.29-7.22 (m, 2H), 4.04 (s, 3H), 3.45 (t, 2H, *J* = 7.5 Hz), 2.87 (tq, 2H, *J* = 7.9, 1.1 Hz).

**<sup>13</sup>C NMR** (101 MHz, CDCl<sub>3</sub>) (major *E*-isomer) δ 144.0 (q, *J* = 2.2 Hz), 141.6 (q, *J* = 31.6 Hz), 131.0 (q, *J* = 1.1 Hz), 129.75, 128.7, 128.1, 122.1 (q, *J* = 278.7 Hz), 56.1, 33.9 (q, *J* = 2.6 Hz), 28.0 (q, *J* = 1.8 Hz); (minor *Z*-isomer) δ 129.79, 129.1, 128.0, 56.8, 35.9, (some carbon peaks were missed due to the small amount.).

**<sup>19</sup>F NMR** (282 MHz, CDCl<sub>3</sub>) δ -56.9 (minor *Z*-isomer), -58.3 (major *E*-isomer).

**HRMS** (ESI) calcd for C<sub>12</sub>H<sub>12</sub>BrF<sub>3</sub>NaO<sub>3</sub>S<sup>+</sup> [M+Na]<sup>+</sup> 394.9535, found 394.9535.

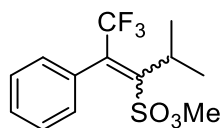

**Methyl 1,1,1-Trifluoro-4-methyl-2-phenylpent-2-ene-3-sulfonate (3ak)**

Following the general procedure A, the crude product was purified by flash chromatography on silica gel (80:1 petroleum ether/EtOAc) to afford **3ak** as a 1:1 *E/Z* mixture as colorless oil (37.8 mg, 61% yield).

**<sup>1</sup>H NMR** (300 MHz, CDCl<sub>3</sub>) δ 7.47-7.43 (m, 0.5 × 3H), 7.42-7.38 (m, 0.5 × 3H), 7.26-7.23 (m, 0.5 × 2H), 7.20-7.16 (m, 0.5 × 2H), 3.99 (s, 0.5 × 3H), 3.51 (hept, 0.5 × 1H, *J* = 8.7 Hz), 3.47 (s, 0.5 × 3H), 2.74 (hept, 0.5 × 1H, *J* = 8.7 Hz), 1.47

(d, 0.5 × 6H,  $J = 8.7$  Hz), 1.21 (d, 0.5 × 6H,  $J = 8.7$  Hz).

**$^{13}\text{C}$  NMR** (101 MHz,  $\text{CDCl}_3$ )  $\delta$  153.5 (q,  $J = 2.2$  Hz), 151.0 (q,  $J = 2.6$  Hz), 138.3 (q,  $J = 31.0$  Hz), 138.0 (q,  $J = 33.8$  Hz), 133.5 (q,  $J = 1.9$  Hz), 131.9 (q,  $J = 1.4$  Hz), 129.3, 129.2, 129.0, 128.9, 127.9 (two peaks overlay), 122.5 (q,  $J = 278.7$  Hz), 120.9 (q,  $J = 276.2$  Hz), 55.9, 55.1, 33.7, 31.5 (q,  $J = 2.8$  Hz), 20.4, 19.9.

**$^{19}\text{F}$  NMR** (282 MHz,  $\text{CDCl}_3$ )  $\delta$  -57.2, -57.4.

**HRMS** (ESI) calcd for  $\text{C}_{13}\text{H}_{15}\text{F}_3\text{NaO}_3\text{S}^+$  [ $\text{M}+\text{Na}$ ] $^+$  331.0586, found 331.0585.

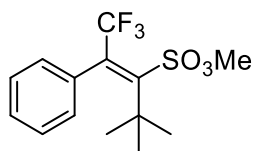

**Methyl (Z)-1,1,1-Trifluoro-4,4-dimethyl-2-phenylpent-2-ene-3-sulfonate (3al)**

Following the general procedure B, the crude product was purified by flash chromatography on silica gel (100:1 petroleum ether/EtOAc) to afford **3al** as a white solid (16.8 mg, 26% yield).

**m.p.** 63.8–64.5 °C.

**$^1\text{H}$  NMR** (300 MHz,  $\text{CDCl}_3$ )  $\delta$  7.50-7.35 (m, 3H), 7.28-7.22 (m, 2H), 3.99 (s, 3H), 1.15 (s, 9H).

**$^{13}\text{C}$  NMR** (101 MHz,  $\text{CDCl}_3$ )  $\delta$  154.6 (q,  $J = 2.3$  Hz), 138.7 (q,  $J = 32.3$  Hz), 133.3 (q,  $J = 1.8$  Hz), 131.3 129.9, 127.9, 121.2 (q,  $J = 277.2$  Hz), 56.2, 40.3, 31.8.

**$^{19}\text{F}$  NMR** (282 MHz,  $\text{CDCl}_3$ )  $\delta$  -58.9.

**HRMS** (ESI) calcd for  $\text{C}_{14}\text{H}_{21}\text{F}_3\text{NO}_3\text{S}^+$  [ $\text{M}+\text{NH}_4$ ] $^+$  340.1189, found 340.1193.

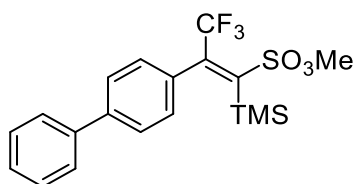



## Methyl

### (Z)-3,3,3-Trifluoro-2-([1,1'-biphenyl]-4-yl)-1-(trimethylsilyl)prop-1-ene-1-Sulfonate (3am)

Following the general procedure B, the crude product was purified by flash chromatography on silica gel (80:1 petroleum ether/EtOAc) to afford **3am** as a white solid (48.7 mg, 59% yield).

**m.p.** 78.1–79.1 °C.

**<sup>1</sup>H NMR** (300 MHz, CDCl<sub>3</sub>) δ 7.69-7.60 (m, 4H), 7.52-7.37 (m, 3H), 7.34 (d, 2H, *J* = 8.4 Hz), 3.98 (s, 3H), -0.01 (s, 9H).

**<sup>13</sup>C NMR** (101 MHz, CDCl<sub>3</sub>) δ 150.2 (q, *J* = 1.8 Hz), 148.9 (q, *J* = 32.9 Hz), 143.3, 139.6, 132.3 (q, *J* = 1.5 Hz), 131.3, 129.0, 128.1, 127.1, 126.9, 120.4 (q, *J* = 279.6 Hz), 55.7, 0.9.

**<sup>19</sup>F NMR** (282 MHz, CDCl<sub>3</sub>) δ -59.2.

**HRMS** (ESI) calcd for C<sub>19</sub>H<sub>21</sub>F<sub>3</sub>NaO<sub>3</sub>SSi<sup>+</sup> [M+Na]<sup>+</sup> 437.0825, found 437.0811.

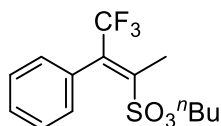

### Butyl (E)-4,4,4-Trifluoro-3-phenylbut-2-ene-2-sulfonate (3an)

Following the general procedure A, the crude product was purified by flash chromatography on silica gel (80:1 petroleum ether/EtOAc) to afford **3an** the title compound as colorless oil (40.8 mg, 63% yield).

**<sup>1</sup>H NMR** (300 MHz, CDCl<sub>3</sub>) δ 7.44-7.36 (m, 3H), 7.27-7.20 (m, 2H), 3.97 (t, 2H, *J* = 6.6 Hz), 2.45 (q, 3H, *J* = 2.5 Hz), 1.63-1.52 (m, 2H), 1.40-1.26 (m, 2H), 0.90 (t, 3H, *J* = 6.6 Hz).

**<sup>13</sup>C NMR** (101 MHz, CDCl<sub>3</sub>) δ 143.0 (q, *J* = 2.5 Hz), 138.7 (q, *J* = 31.3 Hz), 131.5, 129.3, 128.9, 128.0, 122.4 (q, *J* = 278.7 Hz), 70.8, 30.9, 18.6, 16.6 (q, *J* = 2.8 Hz), 13.4.

**<sup>19</sup>F NMR** (282 MHz, CDCl<sub>3</sub>) δ -58.8 (q, *J* = 2.5 Hz).

**HRMS** (ESI) calcd for C<sub>14</sub>H<sub>17</sub>F<sub>3</sub>NaO<sub>3</sub>S<sup>+</sup> [M+Na]<sup>+</sup> 345.0743, found 345.0741.

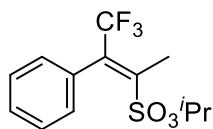

**Isopropyl (*E*)-4,4,4-Trifluoro-3-phenylbut-2-ene-2-sulfonate (3ao)**

Following the general procedure A, the crude product was purified by flash chromatography on silica gel (80:1 petroleum ether/EtOAc) to afford **3ao** as a white solid (39.5 mg, 64% yield).

**m.p.** 37.1–38.3 °C.

**<sup>1</sup>H NMR** (300 MHz, CDCl<sub>3</sub>) δ 7.44-7.36 (m, 3H), 7.25-7.20 (m, 2H), 4.76 (hept, 1H, *J* = 6.3 Hz), 2.45 (q, 3H, *J* = 2.5 Hz), 1.31 (d, 6H, *J* = 6.3 Hz).

**<sup>13</sup>C NMR** (101 MHz, CDCl<sub>3</sub>) δ 143.7 (q, *J* = 2.5 Hz), 138.2 (q, *J* = 31.2 Hz), 131.6 (q, *J* = 1.2 Hz), 129.2, 129.0, 128.0, 122.5 (q, *J* = 278.7 Hz), 78.2, 22.8, 16.6 (q, *J* = 2.8 Hz).

**<sup>19</sup>F NMR** (282 MHz, CDCl<sub>3</sub>) δ -58.8 (q, *J* = 2.5 Hz).

**HRMS** (ESI) calcd for C<sub>13</sub>H<sub>15</sub>F<sub>3</sub>NaO<sub>3</sub>S<sup>+</sup> [M+Na]<sup>+</sup> 331.0586, found 331.0586.

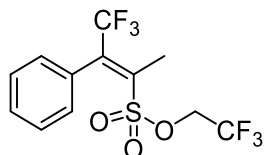

**2,2,2-Trifluoroethyl (*E*)-4,4,4-Trifluoro-3-phenylbut-2-ene-2-sulfonate (3ap)**

Following the general procedure A, the crude product was purified by flash chromatography on silica gel (80:1 petroleum ether/EtOAc) to afford **3ap** as colorless oil (42.3 mg, 61% yield).

**<sup>1</sup>H NMR** (300 MHz, CDCl<sub>3</sub>) δ 7.48-7.39 (m, 3H), 7.25-7.20 (m, 2H), 4.20 (q, 2H, *J* = 7.9 Hz), 2.49 (q, 3H, *J* = 2.5 Hz).

**<sup>13</sup>C NMR** (101 MHz, CDCl<sub>3</sub>) δ 142.5 (q, *J* = 2.2 Hz), 140.3 (q, *J* = 31.5 Hz), 131.0, 129.7, 128.8, 128.3, 122.2 (q, *J* = 278.7 Hz), 121.7 (q, *J* = 278.7 Hz), 64.4 (q, *J* = 38.4 Hz), 16.5 (q, *J* = 2.5 Hz).

$^{19}\text{F}$  NMR (282 MHz,  $\text{CDCl}_3$ )  $\delta$  -59.1 (q,  $J$  = 2.4 Hz), -73.8 (t,  $J$  = 7.9 Hz).

HRMS (ESI) calcd for  $\text{C}_{12}\text{H}_{10}\text{F}_6\text{NaO}_3\text{S}^+$   $[\text{M}+\text{Na}]^+$  371.0147, found 371.0141.

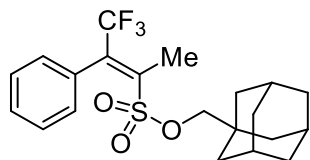

**((3r,5r,7r)-Adamantan-1-yl)methyl (E)-4,4,4-Trifluoro-3-phenylbut-2-ene-1-Sulfonate (3aq)**

Following the general procedure A, the crude product was purified by flash chromatography on silica gel (80:1 petroleum ether/EtOAc) to afford **3aq** as colorless oil (54.8 mg, 66% yield).

$^1\text{H}$  NMR (300 MHz,  $\text{CDCl}_3$ )  $\delta$  7.44-7.36 (m, 3H), 7.25-7.20 (m, 2H), 3.54 (s, 2H), 2.44 (q, 3H,  $J$  = 2.5 Hz), 2.02-1.94 (m, 3H), 1.77-1.66 (m, 3H), 1.66-1.57 (m, 3H), 1.50-1.44 (m, 6H).

$^{13}\text{C}$  NMR (101 MHz,  $\text{CDCl}_3$ )  $\delta$  142.9 (q,  $J$  = 2.5 Hz), 138.7 (q,  $J$  = 31.3 Hz), 131.5 (q,  $J$  = 1.2 Hz), 129.3, 128.9, 128.0, 122.5 (q,  $J$  = 278.7 Hz), 80.1, 38.6, 36.6, 33.4, 27.7, 16.7 (q,  $J$  = 2.8 Hz).

$^{19}\text{F}$  NMR (282 MHz,  $\text{CDCl}_3$ )  $\delta$  -55.7 (q,  $J$  = 2.1 Hz, minor *Z*-isomer), -58.8 (q,  $J$  = 2.5 Hz, major *E*-isomer).

HRMS (ESI) calcd for  $\text{C}_{21}\text{H}_{25}\text{F}_3\text{NaO}_3\text{S}^+$   $[\text{M}+\text{Na}]^+$  437.1369, found 437.1362.

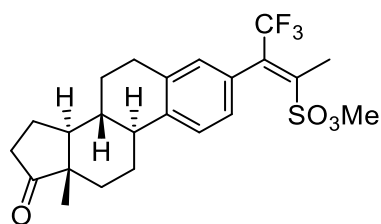

**Methyl**

**(E)-4,4,4-Trifluoro-3-((8R,9S,13S,14S)-13-methyl-17-oxo-7,8,9,11,12,13,14,15,16,17-decahydro-6H-cyclopenta[a]phenanthren-3-yl)but-2-ene-2-sulfonate (3ar)**

Following the general procedure A, the crude product was purified by flash chromatography on silica gel (5:1 petroleum ether/EtOAc) to afford **3ar** as a white solid (59.5 mg, 65% yield).

**m.p.** 162.0–163.8 °C.

**<sup>1</sup>H NMR** (300 MHz, CDCl<sub>3</sub>) δ 7.31 (d, 1H, *J* = 8.1 Hz), 7.00 (d, 1H, *J* = 8.1 Hz), 6.96 (s, 1H), 3.69 (s, 3H), 2.98-2.88 (m, 2H), 2.58-2.25 (m, 3H), 2.44 (q, 3H, *J* = 2.4 Hz), 2.24-1.92 (m, 4H), 1.74-1.39 (m, 6H), 0.92 (s, 3H).

**<sup>13</sup>C NMR** (125 MHz, CDCl<sub>3</sub>) δ 220.6, 141.9, 141.1, 139.4 (q, *J* = 31.3 Hz), 136.3, 129.3, 128.7, 126.1, 124.9, 122.4 (q, *J* = 278.7 Hz), 56.1, 50.5, 47.9, 44.3, 37.7, 35.8, 31.5, 29.1, 26.3, 25.4, 21.5, 16.7 (q, *J* = 2.7 Hz), 13.8.

**<sup>19</sup>F NMR** (282 MHz, CDCl<sub>3</sub>) δ -58.8.

**HRMS** (ESI) calcd for C<sub>23</sub>H<sub>27</sub>F<sub>3</sub>NaO<sub>4</sub>S<sup>+</sup> [M+Na]<sup>+</sup> 479.1474, found 479.1474.

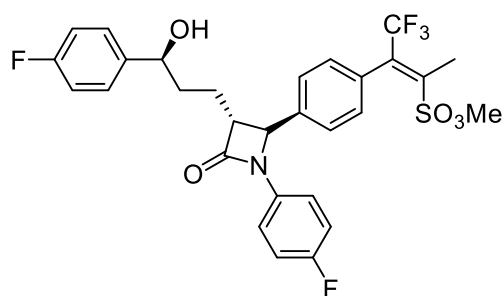

### Methyl

**(E)-4,4,4-Trifluoro-3-(4-((2R,3R)-1-(4-fluorophenyl)-3-((S)-3-(4-fluorophenyl)-3-hydroxypropyl)-4-oxoazetidin-2-yl)phenyl)but-2-ene-2-sulfonate (3as)**

Following the general procedure B, the crude product was purified by flash chromatography on silica gel (3:1 petroleum ether/EtOAc) to afford **3as** as a brown solid (68.9 mg, 58% yield).

**m.p.** 136.5–138.0 °C.

**<sup>1</sup>H NMR** (300 MHz, CDCl<sub>3</sub>) δ 7.37-7.19 (m, 8 H), 7.02 (t, 2H, *J* = 8.7 Hz), 6.94 (t, 2H, *J* = 8.7 Hz), 4.75-4.68 (m, 1H), 4.65 (d, 1H, *J* = 2.1 Hz), 3.65 (s, 3H),

3.20-3.11 (m, 1H), 2.45 (q, 3H,  $J = 2.5$  Hz), 2.21 (d, 1H,  $J = 3.4$  Hz), 2.09-1.86 (m, 4H).

$^{13}\text{C}$  NMR (101 MHz, acetone- $d_6$ )  $\delta$  167.8, 162.6 (d,  $J = 242.3$  Hz), 159.0 (d,  $J = 241.8$  Hz), 144.2 (q,  $J = 2.5$  Hz), 142.9 (d,  $J = 3.0$  Hz), 140.7, 138.8 (q,  $J = 31.2$  Hz), 135.4 (d,  $J = 2.7$  Hz), 132.6 (q,  $J = 1.1$  Hz), 130.7, 128.5 (d,  $J = 8.0$  Hz), 126.8, 123.5 (q,  $J = 277.8$  Hz), 119.2 (d,  $J = 8.0$  Hz), 116.4 (d,  $J = 23.0$  Hz), 115.5 (d,  $J = 21.4$  Hz), 72.7, 61.2, 61.1, 57.7, 37.6, 25.7, 16.9 (q,  $J = 2.9$  Hz).

$^{19}\text{F}$  NMR (282 MHz,  $\text{CDCl}_3$ )  $\delta$  -58.8 (q,  $J = 2.5$  Hz), -114.8 (m), -117.8 (m).

HRMS (ESI) calcd for  $\text{C}_{29}\text{H}_{26}\text{F}_5\text{NNaO}_5\text{S}^+$   $[\text{M}+\text{Na}]^+$  618.1344, found 618.1341.

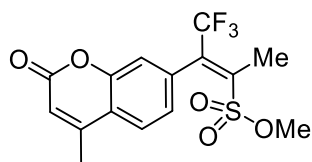

### Methyl

### (*E*)-4,4,4-Trifluoro-3-(4-methyl-2-oxo-2H-chromen-7-yl)but-2-ene-2-sulfonate (**3at**)

Following the general procedure B, the crude product was purified by flash chromatography on silica gel (25:1 petroleum ether/EtOAc) to afford **3at** as a white solid (53.7 mg, 74% yield).

m.p. 142.7–143.8 °C.

$^1\text{H}$  NMR (300 MHz,  $\text{CDCl}_3$ )  $\delta$  7.65 (d, 1H,  $J = 8.1$  Hz), 7.22-7.17 (m, 2H), 6.36 (d, 1H,  $J = 1.6$  Hz), 3.77 (s, 3H), 2.49 (q, 3H,  $J = 2.5$  Hz), 2.46 (d, 3H,  $J = 1.1$  Hz).

$^{13}\text{C}$  NMR (101 MHz,  $\text{CDCl}_3$ )  $\delta$  160.1, 152.8, 151.8, 143.6 (q,  $J = 2.1$  Hz), 137.4 (q,  $J = 31.9$  Hz), 134.8, 124.9, 124.5, 122.0 (q,  $J = 278.5$  Hz), 120.6, 117.4, 116.1, 56.4, 18.5, 16.7 (q,  $J = 2.5$  Hz).

$^{19}\text{F}$  NMR (282 MHz,  $\text{CDCl}_3$ )  $\delta$  -58.6 (q,  $J = 2.5$  Hz).

HRMS (ESI) calcd for  $\text{C}_{15}\text{H}_{14}\text{F}_3\text{O}_5\text{S}^+$   $[\text{M}+\text{H}]^+$  363.0509, found 363.0502.

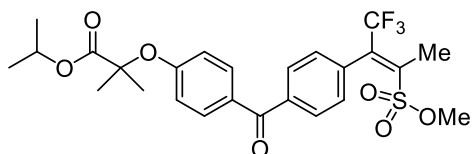

### Isopropyl

#### **(E)-2-Methyl-2-(4-(4-(1,1,1-trifluoro-3-(methoxysulfonyl)but-2-en-2-yl)benzoyl)phenoxy)propanoate (3au)**

Following the general procedure A, the crude product was purified by flash chromatography on silica gel (5:1 petroleum ether/EtOAc) to afford **3au** as a white solid (66.5 mg, 63% yield).

**m.p.** 60.2–61.7 °C.

**<sup>1</sup>H NMR** (300 MHz, CDCl<sub>3</sub>) δ 7.79 (d, 2H, *J* = 8.5 Hz), 7.76 (d, 2H, *J* = 8.8 Hz), 7.35 (d, 2H, *J* = 8.5 Hz), 6.87 (d, 2H, *J* = 8.8 Hz), 5.09 (hept, 1H, *J* = 6.2 Hz), 3.72 (s, 3H), 2.48 (q, 3H, *J* = 2.4 Hz), 1.67 (s, 6H), 1.20 (d, 6H, *J* = 6.2 Hz).

**<sup>13</sup>C NMR** (101 MHz, CDCl<sub>3</sub>) δ 194.5, 173.0, 159.7, 134.0 (q, *J* = 2.2 Hz), 138.7, 138.3 (q, *J* = 31.6 Hz), 134.9 (q, *J* = 1.1 Hz), 132.0, 130.0, 129.4, 128.8, 122.1 (q, *J* = 278.9 Hz), 117.1, 79.3, 69.3, 56.2, 25.3, 21.5, 16.6 (q, *J* = 2.9 Hz).

**<sup>19</sup>F NMR** (282 MHz, CDCl<sub>3</sub>) δ -58.5 (q, *J* = 2.4 Hz).

**HRMS** (ESI) calcd for C<sub>25</sub>H<sub>28</sub>F<sub>3</sub>O<sub>7</sub>S<sup>+</sup> [M+H]<sup>+</sup> 529.1502, found 529.1498.

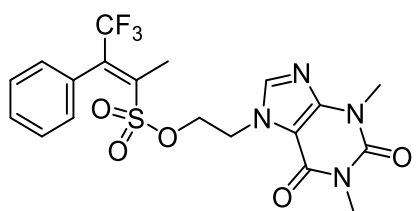

#### **2-(1,3-Dimethyl-2,6-dioxo-1,2,3,6-tetrahydro-7H-purin-7-yl)ethyl (E)-4,4,4-Trifluoro-3-phenylbut-2-ene-2-sulfonate (3av)**

Following the general procedure A, the crude product was purified by flash chromatography on silica gel (20:1 CH<sub>2</sub>Cl<sub>2</sub>/MeOH) to afford **3av** as colorless liquid (55.7 mg, 59% yield).

**<sup>1</sup>H NMR** (300 MHz, CDCl<sub>3</sub>) (major *E*-isomer) δ 7.50 (s, 1H), 7.43-7.36 (m 3H), 7.21-7.15 (m, 2H), 4.44 (t, 2H, *J* = 4.6 Hz), 4.32 (t, 2H, *J* = 4.6 Hz), 3.60 (s, 3H),

3.41 (s, 3H), 2.31 (q, 3H,  $J = 2.5$  Hz); (minor *Z*-isomer) 7.68 (s, 1H), 7.47-7.39 (m, 3H), 7.15-7.11 (m, 2H), 4.71 (t, 2H,  $J = 4.4$  Hz), 4.67 (t, 2H,  $J = 4.4$  Hz), 3.60 (s, 3H), 3.42 (s, 3H), 1.88 (q, 3H,  $J = 2.0$  Hz).

**$^{13}\text{C}$  NMR** (101 MHz,  $\text{CDCl}_3$ ) (major *E*-isomer)  $\delta$  155.2, 151.5, 149.2, 142.11, 142.2 (q,  $J = 2.4$  Hz), 139.6 (q,  $J = 31.5$  Hz), 131.1 (q,  $J = 1.1$  Hz), 129.46, 128.7, 128.1, 122.1 (q,  $J = 278.7$  Hz), 106.2, 68.2, 46.3, 29.8, 27.91, 16.4 (q,  $J = 2.7$  Hz); (minor *Z*-isomer)  $\delta$  155.3, 151.4, 149.3, 142.2, 142.13 (q,  $J = 2.1$  Hz), 129.52, 129.0, 127.8, 106.3, 68.6, 46.4, 27.94, 19.6 (some carbon peaks were missed due to the low amount.).

**$^{19}\text{F}$  NMR** (282 MHz,  $\text{CDCl}_3$ )  $\delta$  -56.1 (q,  $J = 2.0$  Hz, minor *Z*-isomer), -59.0 (q,  $J = 2.5$  Hz, major *E*-isomer).

**HRMS** (ESI) calcd for  $\text{C}_{19}\text{H}_{19}\text{F}_3\text{N}_4\text{NaO}_5\text{S}^+$   $[\text{M}+\text{Na}]^+$  495.0920, found 495.0920.

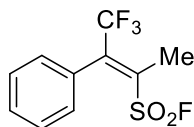

#### **(*E*)-4,4,4-Trifluoro-3-phenylbut-2-ene-2-sulfonyl Fluoride (5a)**

Following the general procedure C, the crude product was purified by flash chromatography on silica gel (100:1 petroleum ether/EtOAc) to afford **5a** as colorless liquid (32.5 mg, 61% yield).

**$^1\text{H}$  NMR** (300 MHz,  $\text{CDCl}_3$ )  $\delta$  7.52-7.40 (m, 3H), 7.28-7.22 (m, 2H), 2.55 (q, 3H,  $J = 2.3$  Hz).

**$^{13}\text{C}$  NMR** (101 MHz,  $\text{CDCl}_3$ )  $\delta$  142.0 (qd,  $J = 32.1, 2.6$  Hz), 141.3 (dq,  $J = 23.8, 2.3$  Hz), 130.3 (q,  $J = 1.1$  Hz), 130.1, 128.7, 128.5, 121.9 (qd,  $J = 278.5, 4.7$  Hz), 16.6 (q,  $J = 2.8$  Hz).

**$^{19}\text{F}$  NMR** (282 MHz,  $\text{CDCl}_3$ )  $\delta$  57.9, -59.3.

**HRMS** (EI) calcd for  $\text{C}_{10}\text{H}_8\text{F}_4\text{O}_2\text{S}^+$   $[\text{M}]^+$  268.0181, found 268.0187.

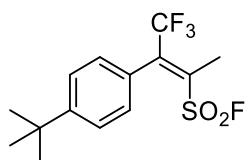

**(E)-3-(4-(*tert*-Butyl)phenyl)-4,4,4-trifluorobut-2-ene-2-sulfonyl Fluoride (5b)**

Following the general procedure C, the crude product was purified by flash chromatography on silica gel (100:1 petroleum ether/EtOAc) to afford **5b** as colorless liquid (37.8 mg, 58% yield).

**<sup>1</sup>H NMR** (300 MHz, CDCl<sub>3</sub>) δ 7.43 (d, 2H, *J* = 8.5 Hz), 7.16 (d, 2H, *J* = 8.5 Hz), 2.53 (q, 3H, *J* = 2.4 Hz), 1.33 (s, 9H).

**<sup>13</sup>C NMR** (101 MHz, CDCl<sub>3</sub>) δ 153.4, 142.2 (qd, *J* = 32.2, 2.7 Hz), 141.0 (dq, *J* = 23.7, 2.2 Hz), 128.5, 127.3 (q, *J* = 1.1 Hz), 125.4, 122.0 (qd, *J* = 278.3, 4.6 Hz), 34.8, 31.1, 16.7 (q, *J* = 2.8 Hz).

**<sup>19</sup>F NMR** (282 MHz, CDCl<sub>3</sub>) δ 57.6, -59.4.

**HRMS** (EI) calcd for C<sub>14</sub>H<sub>16</sub>F<sub>4</sub>O<sub>2</sub>S<sup>+</sup> [M]<sup>+</sup> 324.0802, found 324.0796.

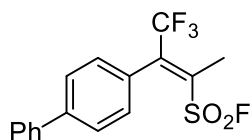

**(E)-3-([1,1'-Biphenyl]-4-yl)-4,4,4-trifluorobut-2-ene-2-sulfonyl Fluoride (5c)**

Following the general procedure C, the crude product was purified by flash chromatography on silica gel (100:1 petroleum ether/EtOAc) to afford **5c** as a white solid (44.3 mg, 64% yield).

**m.p.** 145.1–146.6 °C.

**<sup>1</sup>H NMR** (300 MHz, CDCl<sub>3</sub>) δ 7.70-7.58 (m, 4H), 7.50-7.35 (m, 3H), 7.32 (d, 2H, *J* = 8.1 Hz), 2.57 (q, 3H, *J* = 2.1 Hz).

**<sup>13</sup>C NMR** (101 MHz, CDCl<sub>3</sub>) δ 143.1, 141.9 (qd, *J* = 32.4, 2.5 Hz), 141.4 (dq, *J* = 24.0, 2.2 Hz), 139.9, 129.3, 129.1 (q, *J* = 1.1 Hz), 128.9, 128.0, 127.2, 127.1, 122.0 (qd, *J* = 278.6, 4.7 Hz), 16.7 (q, *J* = 2.8 Hz).



**<sup>19</sup>F NMR** (282 MHz, CDCl<sub>3</sub>) δ 57.9, -59.3.

**HRMS** (EI) calcd for C<sub>16</sub>H<sub>12</sub>F<sub>4</sub>O<sub>2</sub>S<sup>+</sup> [M]<sup>+</sup> 344.0489, found 344.0491.

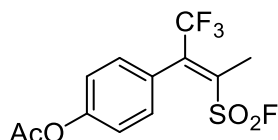

**(E)-4-(1,1,1-Trifluoro-3-(fluorosulfonyl)but-2-en-2-yl)phenyl Acetate (5d)**

Following the general procedure C, the crude product was purified by flash chromatography on silica gel (100:1 petroleum ether/EtOAc) to afford **5d** as a white solid (39.2 mg, 60% yield).

**m.p.** 60.1–60.9 °C.

**<sup>1</sup>H NMR** (300 MHz, CDCl<sub>3</sub>) δ 7.27 (d, 2H, *J* = 8.8 Hz), 7.20 (d, 2H, *J* = 8.8 Hz), 2.54 (q, 3H, *J* = 2.2 Hz), 2.31 (s, 3H).

**<sup>13</sup>C NMR** (101 MHz, CDCl<sub>3</sub>) δ 168.7, 152.1, 141.8 (dq, *J* = 24.1, 2.2 Hz), 141.2 (qd, *J* = 32.4, 2.5 Hz), 130.1, 127.5 (q, *J* = 1.1 Hz), 121.8 (qd, *J* = 278.8, 4.6 Hz), 121.7, 21.1, 16.7 (q, *J* = 2.7 Hz).

**<sup>19</sup>F NMR** (282 MHz, CDCl<sub>3</sub>) δ 57.9, -59.3 (q, *J* = 2.2 Hz).

**HRMS** (ESI) calcd for C<sub>12</sub>H<sub>11</sub>F<sub>4</sub>O<sub>4</sub>S<sup>+</sup> [M+H]<sup>+</sup> 327.0309, found 327.0306.

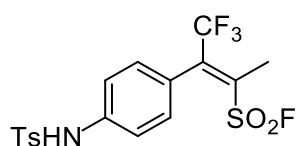

**(E)-4,4,4-Trifluoro-3-(4-((4-methylphenyl)sulfonamido)phenyl)but-2-ene-2-sulfonyl Fluoride (5e)**

Following the general procedure C, the crude product was purified by flash chromatography on silica gel (20:1 petroleum ether/EtOAc) to afford **5e** as a white solid (48.3 mg, 55% yield).

**m.p.** 105.7–107.1 °C.

**<sup>1</sup>H NMR** (300 MHz, CDCl<sub>3</sub>) δ 7.61 (d, 2H, *J* = 8.3 Hz), 7.23 (d, 2H, *J* = 8.3 Hz), 7.12 (s, 4H), 6.62 (brs, 1H), 2.52 (q, 3H, *J* = 2.1 Hz), 2.38 (s, 3H).

**<sup>13</sup>C NMR** (101 MHz, CDCl<sub>3</sub>) δ 144.3, 141.6 (dq, *J* = 23.8, 2.2 Hz), 141.2 (qd, *J* = 32.6, 2.5 Hz), 138.7, 135.5, 129.9, 129.7, 127.1, 126.6 (q, *J* = 1.1 Hz), 121.7 (qd, *J* = 278.5, 4.8 Hz), 120.6, 21.5, 16.6 (q, *J* = 2.8 Hz).

**<sup>19</sup>F NMR** (282 MHz, CDCl<sub>3</sub>) δ 57.9, -59.4.

**HRMS** (ESI) calcd for C<sub>17</sub>H<sub>16</sub>F<sub>4</sub>NO<sub>4</sub>S<sub>2</sub><sup>+</sup> [M+H]<sup>+</sup> 438.0451, found 438.0447.

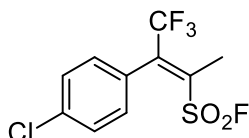

**(E)-3-(4-Chlorophenyl)-4,4,4-trifluorobut-2-ene-2-sulfonyl Fluoride (5f)**

Following the general procedure C, the crude product was purified by flash chromatography on silica gel (petroleum ether) to afford **5f** as a white solid (34.5 mg, 57% yield).

**m.p.** 35.7–36.5 °C.

**<sup>1</sup>H NMR** (300 MHz, CDCl<sub>3</sub>) δ 7.42 (d, 2H, *J* = 8.5 Hz), 7.18 (d, 2H, *J* = 8.5 Hz), 2.55 (q, 3H, *J* = 2.3 Hz).

**<sup>13</sup>C NMR** (101 MHz, CDCl<sub>3</sub>) δ 142.0 (dq, *J* = 24.1, 2.3 Hz), 140.9 (qd, *J* = 32.5, 2.5 Hz), 136.6, 130.1, 128.9, 128.6 (q, *J* = 1.4 Hz), 121.7 (qd, *J* = 278.9, 4.7 Hz), 16.6 (q, *J* = 2.8 Hz).

**<sup>19</sup>F NMR** (282 MHz, CDCl<sub>3</sub>) δ 58.0, -59.4.

**HRMS** (EI) calcd for C<sub>10</sub>H<sub>7</sub>ClF<sub>4</sub>O<sub>2</sub>S<sup>+</sup> [M]<sup>+</sup> 301.9786, found 301.9787.

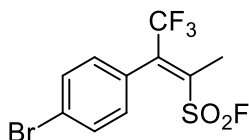

**(E)-3-(4-Bromophenyl)-4,4,4-Trifluorobut-2-ene-2-sulfonyl Fluoride (5g)**

Following the general procedure C, the crude product was purified by flash chromatography on silica gel (petroleum ether) to afford **5g** as a white solid (42.3 mg, 61% yield).

**m.p.** 39.1–40.3 °C.

**<sup>1</sup>H NMR** (300 MHz, CDCl<sub>3</sub>) δ 7.58 (d, 2H, *J* = 8.5 Hz), 7.12 (d, 2H, *J* = 8.5 Hz), 2.54 (q, 3H, *J* = 2.3 Hz).

**<sup>13</sup>C NMR** (101 MHz, CDCl<sub>3</sub>) δ 141.9 (dq, *J* = 24.1, 2.4 Hz), 140.9 (qd, *J* = 32.7, 2.6 Hz), 131.9, 130.3, 129.1 (q, *J* = 1.1 Hz), 124.9, 121.6 (qd, *J* = 278.5, 4.4 Hz), 16.7 (q, *J* = 2.7 Hz).

**<sup>19</sup>F NMR** (282 MHz, CDCl<sub>3</sub>) δ 58.0, -59.3.

**HRMS** (EI) calcd for C<sub>10</sub>H<sub>7</sub>BrF<sub>4</sub>O<sub>2</sub>S<sup>+</sup> [M]<sup>+</sup> 345.9286, found 345.9289.

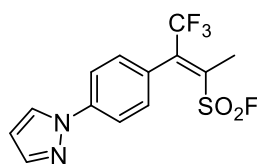

**(E)-3-(4-(1H-Pyrazol-1-yl)phenyl)-4,4,4-trifluorobut-2-ene-2-sulfonyl Fluoride (5h)**

Following the general procedure C, the crude product was purified by flash chromatography on silica gel (100:1 petroleum ether/EtOAc) to afford **5h** as a white solid (36.0 mg, 54% yield).

**m.p.** 70.2–71.4 °C.

**<sup>1</sup>H NMR** (300 MHz, CDCl<sub>3</sub>) δ 7.98 (d, 1H, *J* = 2.5 Hz), 7.80 (d, 2H, *J* = 8.7 Hz), 7.75 (d, 1H, *J* = 1.4 Hz), 7.34 (d, 2H, *J* = 8.7 Hz), 6.50 (dd, 1H, *J* = 2.5, 1.4 Hz), 2.57 (q, 3H, *J* = 2.2 Hz).

**<sup>13</sup>C NMR** (101 MHz, CDCl<sub>3</sub>) δ 141.8 (dq, *J* = 24.0, 2.5 Hz), 141.7, 141.3, 141.2 (qd, *J* = 32.1, 2.6 Hz), 130.1, 127.9 (q, *J* = 1.4 Hz), 126.7, 121.8 (qd, *J* = 279.4, 4.5 Hz), 118.7, 108.2, 16.7 (q, *J* = 2.8 Hz).

**<sup>19</sup>F NMR** (282 MHz, CDCl<sub>3</sub>) δ 58.0, -59.3.

**HRMS** (ESI) calcd for C<sub>13</sub>H<sub>11</sub>F<sub>4</sub>N<sub>2</sub>O<sub>2</sub>S<sup>+</sup> [M+H]<sup>+</sup> 335.0472, found 335.0461.

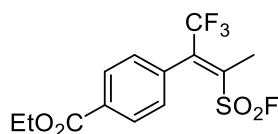

**Ethyl (E)-4-(1,1,1-Trifluoro-3-(fluorosulfonyl)but-2-en-2-yl)benzoate (5i)**

Following the general procedure C, the crude product was purified by flash chromatography on silica gel (100:1 petroleum ether/EtOAc) to afford **5i** as colorless oil (36.8 mg, 54% yield).

**<sup>1</sup>H NMR** (300 MHz, CDCl<sub>3</sub>) δ 8.12 (d, 2H, *J* = 8.4 Hz), 7.33 (d, 2H, *J* = 8.4 Hz), 4.40 (q, 2H, *J* = 7.1 Hz), 2.57 (q, 3H, *J* = 2.3 Hz), 1.40 (t, 3 H, *J* = 7.1 Hz).

**<sup>13</sup>C NMR** (101 MHz, CDCl<sub>3</sub>) δ 165.6, 141.8 (dq, *J* = 24.6, 2.5 Hz), 141.2 (qd, *J* = 32.5, 2.5 Hz), 134.6 (q, *J* = 1.1 Hz), 132.1, 129.6, 128.8, 121.7 (qd, *J* = 278.8, 4.5 Hz), 61.3, 16.7 (q, *J* = 2.7 Hz), 14.3.

**<sup>19</sup>F NMR** (282 MHz, CDCl<sub>3</sub>) δ 58.3, -59.1.

**HRMS** (ESI) calcd for C<sub>13</sub>H<sub>13</sub>F<sub>4</sub>O<sub>4</sub>S<sup>+</sup> [M+H]<sup>+</sup> 341.0465, found 341.0459.

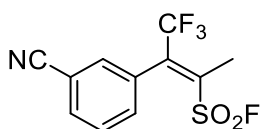

**(E)-3-(3-Cyanophenyl)-4,4,4-trifluorobut-2-ene-2-sulfonyl Fluoride (5j)**

Following the general procedure D, the crude product was purified by flash chromatography on silica gel (100:1 petroleum ether/EtOAc) to afford **5j** as colorless liquid (29.8 mg, 51% yield).

**<sup>1</sup>H NMR** (300 MHz, CDCl<sub>3</sub>) δ 7.78 (d, 1H, *J* = 7.8 Hz), 7.59 (t, 1H, *J* = 7.8 Hz), 7.56 (s, 1H), 7.49 (d, 1 H, *J* = 7.8 Hz), 2.58 (q, 3H, *J* = 2.7 Hz).

**<sup>13</sup>C NMR** (101 MHz, CDCl<sub>3</sub>) δ 142.9 (dq, *J* = 24.7, 2.2 Hz), 139.5 (qd, *J* = 32.9, 2.5 Hz), 133.6, 133.0, 132.1, 131.6 (q, *J* = 1.1 Hz), 129.5, 121.4 (qd, *J* = 279.3, 4.4 Hz), 117.6, 113.2, 16.6 (q, *J* = 2.7 Hz).

**<sup>19</sup>F NMR** (282 MHz, CDCl<sub>3</sub>) δ 58.4, -59.1.

**HRMS** (EI) calcd for C<sub>11</sub>H<sub>7</sub>F<sub>4</sub>NO<sub>2</sub>S<sup>+</sup> [M]<sup>+</sup> 293.0128, found 293.0128.

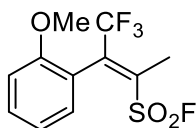

**(E)-4,4,4-Trifluoro-3-(2-methoxyphenyl)but-2-ene-2-sulfonyl Fluoride (5k)**

Following the general procedure D, the crude product was purified by flash chromatography on silica gel (100:1 petroleum ether/EtOAc) to afford **5k** as colorless liquid (26.2 mg, 44% yield).

**<sup>1</sup>H NMR** (300 MHz, CDCl<sub>3</sub>) δ 7.44 (ddd, 1H, *J* = 8.4, 7.5, 1.8 Hz), 7.12 (dd, 1H, *J* = 7.8, 1.8 Hz), 7.00 (ddd, 1H, *J* = 7.8, 7.5, 1.0 Hz), 6.94 (dd, 1H, *J* = 8.4, 1.0 Hz), 3.84 (s, 3H), 2.53 (q, 3H, *J* = 2.1 Hz).

**<sup>13</sup>C NMR** (101 MHz, CDCl<sub>3</sub>) δ 157.1, 141.2 (dq, *J* = 24.1, 2.5 Hz), 140.3 (qd, *J* = 33.3, 2.7 Hz), 131.9, 129.9, 121.7 (qd, *J* = 279.5, 4.5 Hz), 120.4, 119.8 (q, *J* = 1.1 Hz), 110.8, 55.7, 16.5 (q, *J* = 2.6 Hz).

**<sup>19</sup>F NMR** (282 MHz, CDCl<sub>3</sub>) δ 56.8, -60.5.

**HRMS** (ESI) calcd for C<sub>11</sub>H<sub>10</sub>F<sub>4</sub>NaO<sub>3</sub>S<sup>+</sup> [M+Na]<sup>+</sup> 321.0179, found 321.0175.

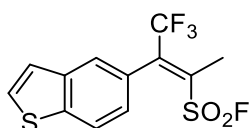

**(E)-3-(Benzo[*b*]thiophen-5-yl)-4,4,4-trifluorobut-2-ene-2-sulfonyl Fluoride (5l)**

Following the general procedure C, the crude product was purified by flash chromatography on silica gel (100:1 petroleum ether/EtOAc) to afford **5l** as a white solid (34.6 mg, 53% yield).

**m.p.** 68.1–69.7 °C.

**<sup>1</sup>H NMR** (300 MHz, CDCl<sub>3</sub>) δ 7.97 (d, 1H, *J* = 8.3 Hz), 7.74 (d, 1H, *J* = 1.1 Hz), 7.56 (d, 1H, *J* = 5.4 Hz), 7.40 (d, 1H, *J* = 5.4 Hz), 7.22 (dd, 1H, *J* = 8.3, 1.1 Hz), 2.61 (q, 3H, *J* = 2.3 Hz).

**<sup>13</sup>C NMR** (101 MHz, CDCl<sub>3</sub>) δ 142.1 (qd, *J* = 32.1, 2.6 Hz), 141.6 (dq, *J* = 23.6, 2.2 Hz), 141.4, 139.3, 128.0, 126.3 (q, *J* = 1.1 Hz), 124.1, 123.9, 122.7, 120.0 (qd, *J* = 278.5, 4.7 Hz), 16.7 (q, *J* = 2.8 Hz).

**<sup>19</sup>F NMR** (282 MHz, CDCl<sub>3</sub>) δ 57.7, -59.3.

**HRMS** (ESI) calcd for C<sub>12</sub>H<sub>8</sub>F<sub>4</sub>NaO<sub>2</sub>S<sub>2</sub><sup>+</sup> [M+Na]<sup>+</sup> 346.9794, found 346.9789.

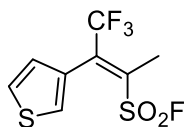

**(E)-4,4,4-T**

**rifluoro-3-(thiophen-3-yl)but-2-ene-2-sulfonyl Fluoride (5m)**

Following the general procedure C, the crude product was purified by flash chromatography on silica gel (petroleum ether) to afford **5m** as colorless liquid (26.8 mg, 49% yield).

**<sup>1</sup>H NMR** (300 MHz, CDCl<sub>3</sub>) δ 7.45-7.40 (m, 2H), 7.06-7.01 (m, 1H), 2.53 (qd, 3H, *J* = 2.4, 1.2 Hz).

**<sup>13</sup>C NMR** (101 MHz, CDCl<sub>3</sub>) δ 142.1 (dq, *J* = 24.2, 2.3 Hz), 137.4 (qd, *J* = 33.1, 2.6 Hz), 129.0 (q, *J* = 1.2 Hz), 128.2, 127.6, 126.5, 121.6 (qd, *J* = 278.6, 4.7 Hz), 16.8 (q, *J* = 2.9 Hz).

**<sup>19</sup>F NMR** (282 MHz, CDCl<sub>3</sub>) δ 56.7, -60.1.

**HRMS** (EI) calcd for C<sub>8</sub>H<sub>6</sub>F<sub>4</sub>O<sub>2</sub>S<sub>2</sub><sup>+</sup> [M]<sup>+</sup> 273.9740, found 273.9742.

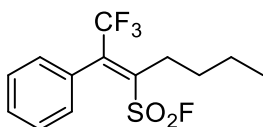

**(E)-1,1,1-Trifluoro-2-phenylhept-2-ene-3-sulfonyl Fluoride (5n)**

Following the general procedure C, the crude product was purified by flash chromatography on silica gel (100:1 petroleum ether/EtOAc) to afford **5n** as colorless liquid (34.3 mg, 55% yield).

**<sup>1</sup>H NMR** (300 MHz, CDCl<sub>3</sub>) δ 7.52-7.39 (m, 3H), 7.28-7.22 (m, 2H), 2.90-2.80 (m, 2H), 1.82-1.69 (m, 2H), 1.49 (tq, 2H, *J* = 7.3, 7.3 Hz), 0.99 (t, 3H, *J* = 7.3 Hz).

**<sup>13</sup>C NMR** (101 MHz, CDCl<sub>3</sub>) δ 146.8 (dq, *J* = 19.0, 2.3 Hz), 141.7 (qd, *J* = 32.2, 1.4 Hz), 130.5 (q, *J* = 1.1 Hz), 130.0, 128.8, 128.4, 122.2 (qd, *J* = 279.1, 4.4 Hz), 31.5, 30.8 (q, *J* = 2.2 Hz), 22.7, 13.5.

**<sup>19</sup>F NMR** (282 MHz, CDCl<sub>3</sub>) δ 62.5, -58.7.

**HRMS** (EI) calcd for C<sub>13</sub>H<sub>14</sub>F<sub>4</sub>O<sub>2</sub>S<sup>+</sup> [M]<sup>+</sup> 310.0645, found 310.0648.

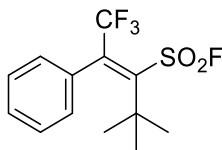

**(Z)-1,1,1-Trifluoro-4,4-dimethyl-2-phenylpent-2-ene-3-sulfonyl Fluoride (5o)**

Following the general procedure C, the crude product was purified by flash chromatography on silica gel (100:1 petroleum ether/EtOAc) to afford **5o** as a white solid (19.9 mg, 32% yield).

**m.p.** 76.8–77.9 °C.

**<sup>1</sup>H NMR** (300 MHz, CDCl<sub>3</sub>) δ 7.54-7.39 (m, 3H), 7.32-7.25 (m, 2H), 1.17 (d, 9H, *J* = 0.6 Hz).

**<sup>13</sup>C NMR** (101 MHz, CDCl<sub>3</sub>) δ 152.9 (dq, *J* = 14.1, 2.1 Hz), 141.5 (q, *J* = 33.2 Hz), 132.2 (q, *J* = 3.2 Hz), 131.1, 130.5, 128.3, 121.0 (q, *J* = 277.7 Hz), 40.6, 31.8 (d, *J* = 2.5 Hz).

**<sup>19</sup>F NMR** (282 MHz, CDCl<sub>3</sub>) δ 69.4 (q, *J* = 19.8 Hz), -59.3 (d, *J* = 19.8 Hz).

**HRMS** (ESI) calcd for C<sub>13</sub>H<sub>15</sub>F<sub>4</sub>O<sub>2</sub>S<sup>+</sup> [M+H]<sup>+</sup> 311.0723, found 311.0733.

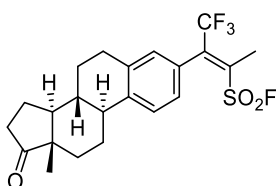

**(E)-4,4,4-Trifluoro-3-((8R,9S,13S,14S)-13-methyl-17-oxo-7,8,9,11,12,13,14,15,16,17-decahydro-6H-cyclopenta[a]phenanthren-3-yl)but-2-ene-2-sulfonyl Fluoride (5p)**

Following the general procedure D, the crude product was purified by flash chromatography on silica gel (30:1 petroleum ether/EtOAc) to afford **5p** as a white solid (54.4 mg, 61% yield).

**m.p.** 45.8-47.0 °C.

**<sup>1</sup>H NMR** (300 MHz, CDCl<sub>3</sub>) δ 7.33 (d, 1H, *J* = 8.2 Hz), 7.01 (d, 1H, *J* = 8.2 Hz),

6.96 (s, 1H), 3.00-2.86 (m, 2H), 2.58-2.25 (m, 3H), 2.53 (q, 3H,  $J = 2.4$  Hz), 2.24-1.98 (m, 4H), 1.74-1.41 (m, 6H), 0.93 (s, 3H).

$^{13}\text{C}$  NMR (101 MHz,  $\text{CDCl}_3$ )  $\delta$  220.7, 142.2 (qd,  $J = 35.2, 2.5$  Hz), 142.0, 140.8 (dq,  $J = 24.9, 2.6$  Hz), 136.8, 129.1, 127.6, 126.0, 125.4, 121.9 (qd,  $J = 279.0, 4.7$  Hz), 50.5, 47.9, 44.3, 37.7, 35.8, 31.5, 29.1, 26.2, 25.4, 21.5, 16.6 (q,  $J = 2.6$  Hz), 13.8.

$^{19}\text{F}$  NMR (282 MHz,  $\text{CDCl}_3$ )  $\delta$  57.6, -59.4.

HRMS (ESI) calcd for  $\text{C}_{22}\text{H}_{25}\text{F}_4\text{O}_3\text{S}^+$   $[\text{M}+\text{H}]^+$  445.1455, found 445.1453.

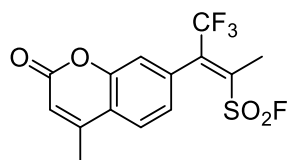

**(E)-4,4,4-Trifluoro-3-(4-methyl-2-oxo-2H-chromen-7-yl)but-2-ene-2-sulfonyl Fluoride (5q)**

Following the general procedure D, the crude product was purified by flash chromatography on silica gel (20:1 petroleum ether/EtOAc) to afford **5q** as a white solid (46.9 mg, 67% yield).

**m.p.** 141.6-143.2 °C.

$^1\text{H}$  NMR (300 MHz,  $\text{CDCl}_3$ )  $\delta$  7.67 (d, 1H,  $J = 8.2$  Hz), 7.24 (d, 1H,  $J = 1.5$  Hz), 7.18 (dd, 1H,  $J = 8.2, 1.5$  Hz), 6.38 (q, 1H,  $J = 1.2$  Hz), 2.59 (q, 3H,  $J = 2.4$  Hz), 2.47 (d, 3H,  $J = 1.2$  Hz).

$^{13}\text{C}$  NMR (101 MHz,  $\text{CDCl}_3$ )  $\delta$  159.9, 153.0, 151.6, 142.4 (dq,  $J = 24.5, 2.5$  Hz), 140.1 (qd,  $J = 32.8, 2.6$  Hz), 133.4 (q,  $J = 1.4$  Hz), 124.9, 124.5, 121.5 (qd,  $J = 279.3, 4.4$  Hz), 121.3, 117.5, 116.5, 18.5, 16.7 (q,  $J = 2.5$  Hz).

$^{19}\text{F}$  NMR (282 MHz,  $\text{CDCl}_3$ )  $\delta$  58.4, -59.0.

HRMS (ESI) calcd for  $\text{C}_{14}\text{H}_{11}\text{F}_4\text{O}_4\text{S}^+$   $[\text{M}+\text{H}]^+$  351.0309, found 351.0299.

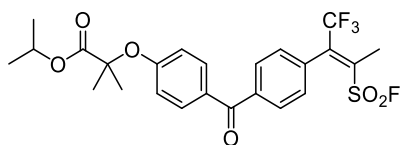



## Isopropyl

### (*E*)-2-Methyl-2-(4-(4-(1,1,1-trifluoro-3-(fluorosulfonyl)but-2-en-2-yl)benzoyl)phenoxy)propanoate (**5r**)

Following the general procedure D, the crude product was purified by flash chromatography on silica gel (30:1 petroleum ether/EtOAc) to afford **5r** as a white solid (53.5 mg, 52% yield).

**m.p.** 60.1-61.4 °C.

**<sup>1</sup>H NMR** (300 MHz, CDCl<sub>3</sub>) δ 7.80 (d, 2H, *J* = 8.3 Hz), 7.76 (d, 2H, *J* = 8.9 Hz), 7.36 (d, 2H, *J* = 8.3 Hz), 6.88 (d, 2H, *J* = 8.9 Hz), 5.09 (hept, 1H, *J* = 6.3 Hz), 2.58 (q, 3H, *J* = 2.3 Hz), 1.67 (s, 6H), 1.20 (d, 6H, *J* = 6.3 Hz).

**<sup>13</sup>C NMR** (101 MHz, CDCl<sub>3</sub>) δ 194.4, 173.0, 159.9, 141.8 (dq, *J* = 24.2, 2.4 Hz), 141.2 (qd, *J* = 32.8, 2.6 Hz), 139.5, 133.6, 132.1, 129.9, 129.6, 128.7, 121.7 (qd, *J* = 279.3, 4.1 Hz), 117.2, 79.4, 69.3, 25.3, 21.5, 16.7 (q, *J* = 2.5 Hz).

**<sup>19</sup>F NMR** (282 MHz, CDCl<sub>3</sub>) δ 58.2, -59.0.

**HRMS** (ESI) calcd for C<sub>24</sub>H<sub>25</sub>F<sub>4</sub>O<sub>6</sub>S<sup>+</sup> [M+H]<sup>+</sup> 517.1302, found 517.1295.

## Synthesis

of

### (*E*)-4-((4,4,4-Trifluoro-3-(4-methoxyphenyl)but-2-en-2-yl)sulfonyl)morpholine (**6**)

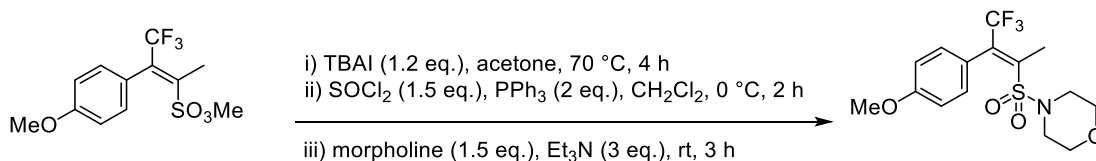

A mixture of **3a** (62.1 mg, 0.2 mmol, 1.0 equiv.) and TBAI (88.7 mg, 0.24 mmol) in acetone (1 mL) was heated to reflux for 4 h. The solvent was evaporated to afford crude sulfonic acid. Then PPh<sub>3</sub> (104.9 mg, 0.4 mmol), anhydrous CH<sub>2</sub>Cl<sub>2</sub> (1 mL), and SOCl<sub>2</sub> (21.8 μL, 0.3 mmol) was added at 0 °C. The mixture was stirred at this temperature for 2 h. To the mixture were added Et<sub>3</sub>N (83.0 μL, 0.6 mmol) and morpholine (26.1 μL). The reaction mixture was stirred at room

temperature for 3 h. EtOAc (10 mL) and water (8 mL) were added. The two layers were separated and the aqueous layer was extracted with EtOAc (2 × 8 mL). The combined organic layers were washed with brine, dried over Na<sub>2</sub>SO<sub>4</sub>, and concentrated. The residue was purified by flash chromatography on silica gel (3:1 petroleum ether/EtOAc) to afford **6** (49.9 mg, 68% yield) as a pale-yellow solid.

**m.p.** 135.4–137.0 °C.

**<sup>1</sup>H NMR** (300 MHz, CDCl<sub>3</sub>) δ 7.14 (d, 2H, *J* = 8.7 Hz), 6.92 (d, 2H, *J* = 8.7 Hz), 3.82 (s, 3H), 3.65-3.57 (m, 4H), 3.08-2.99 (m, 4H), 2.36 (q, 3H, *J* = 2.5 Hz).

**<sup>13</sup>C NMR** (101 MHz, CDCl<sub>3</sub>) δ 160.0, 144.9 (q, *J* = 2.2 Hz), 137.1 (q, *J* = 30.8 Hz), 130.5, 123.8 (q, *J* = 1.1 Hz), 122.7 (q, *J* = 278.9 Hz), 113.4, 66.6, 55.1, 45.3, 16.9 (q, *J* = 2.9 Hz).

**<sup>19</sup>F NMR** (282 MHz, CDCl<sub>3</sub>) δ -58.6 (q, *J* = 2.5 Hz).

**HRMS** (ESI) calcd for C<sub>15</sub>H<sub>19</sub>F<sub>3</sub>NO<sub>4</sub>S<sup>+</sup> [M+H]<sup>+</sup> 366.0981, found 366.0982.

## Synthesis

of

### (*E*)-1-((3-(4-Chlorophenyl)-4,4,4-trifluorobut-2-en-2-yl)sulfonyl)-1*H*-imidazole (**7**)

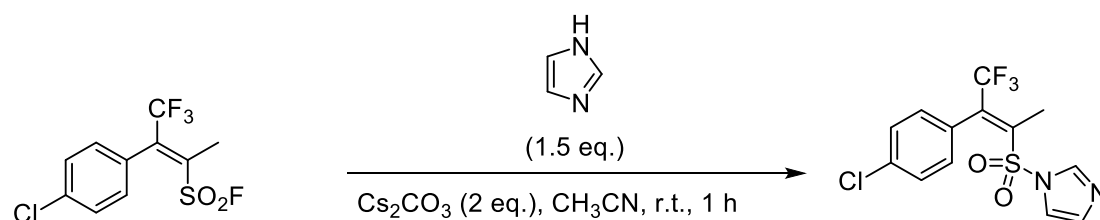

A mixture of **5f** (60.4 mg, 0.2 mmol, 1.0 equiv.), imidazole (20.4 mg, 0.3 mmol), and Cs<sub>2</sub>CO<sub>3</sub> (130.3 mg, 0.4 mmol) in CH<sub>3</sub>CN (1 mL) was stirred at room temperature for 1 h. EtOAc (10 mL) and water (8 mL) were added. The two layers were separated and the aqueous layer was extracted with EtOAc (2 × 8 mL). The combined organic layers were washed with brine, dried over Na<sub>2</sub>SO<sub>4</sub>, and concentrated. The residue was purified by flash chromatography on silica gel (5:1 petroleum ether/EtOAc) to afford **7** (33.5 mg, 48% yield) as a white solid.

**m.p.** 64.3–66.5 °C.

**<sup>1</sup>H NMR** (300 MHz, CDCl<sub>3</sub>) δ 7.60-7.58 (m, 1H), 7.42 (d, 2H, *J* = 8.6 Hz), 7.14-7.12 (m, 1H), 7.09 (d, 2H, *J* = 8.6 Hz), 7.06 (dd, 1H, *J* = 1.5, 1.4 Hz), 2.34 (q, 3H, *J* = 2.3 Hz).

**<sup>13</sup>C NMR** (101 MHz, CDCl<sub>3</sub>) δ 145.1 (q, *J* = 2.2 Hz), 139.8 (q, *J* = 32.2 Hz), 137.1, 136.4, 131.5, 130.1, 128.8, 128.3 (*J* = 1.2 Hz), 121.7 (q, *J* = 279.1 Hz), 117.5, 16.1 (q, *J* = 2.8 Hz).

**<sup>19</sup>F NMR** (282 MHz, CDCl<sub>3</sub>) δ -59.2 (d, *J* = 2.3 Hz).

**HRMS** (ESI) calcd for C<sub>13</sub>H<sub>11</sub>ClF<sub>3</sub>N<sub>2</sub>O<sub>2</sub>S<sup>+</sup> [M+H]<sup>+</sup> 351.0176, found 351.0174.

### Synthesis of (*E*)-3-(4-Chlorophenyl)-4,4,4-trifluorobut-2-ene-2-sulfonyl azide (**8**)

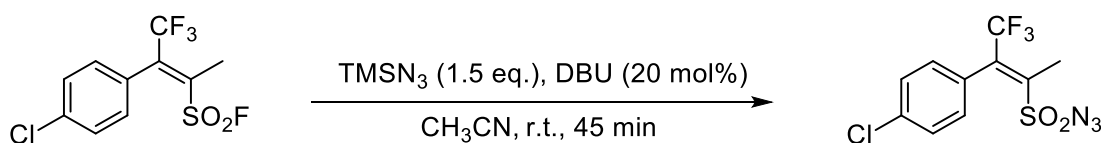

A mixture of **5f** (60.4 mg, 0.2 mmol, 1.0 equiv.), TMSN<sub>3</sub> (40 μL, 0.3 mmol), and DBU (6.0 μL, 0.04 mmol) in CH<sub>3</sub>CN (1 mL) was stirred at room temperature for 45 min. EtOAc (10 mL) and water (8 mL) were added. The two layers were separated and the aqueous layer was extracted with EtOAc (2 × 8 mL). The combined organic layers were washed with brine, dried over Na<sub>2</sub>SO<sub>4</sub>, and concentrated. The residue was purified by flash chromatography on silica gel (100:1 petroleum ether/EtOAc) to afford **8** (46.0 mg, 71% yield) as a white solid.

**m.p.** 61.5–62.7 °C.

**<sup>1</sup>H NMR** (300 MHz, CDCl<sub>3</sub>) δ 7.42 (d, 2H, *J* = 8.5 Hz), 7.19 (d, 2H, *J* = 8.5 Hz), 2.51 (q, 3H, *J* = 2.4 Hz).

**<sup>13</sup>C NMR** (101 MHz, CDCl<sub>3</sub>) δ 146.0 (q, *J* = 2.2 Hz), 138.7 (q, *J* = 32.2 Hz), 136.3, 130.3, 128.9 (q, *J* = 1.4 Hz), 128.8, 122.0 (q, *J* = 279.1 Hz), 16.8 (q, *J* =

2.8 Hz).

$^{19}\text{F}$  NMR (282 MHz,  $\text{CDCl}_3$ )  $\delta$  -59.1 (q,  $J$  = 2.4 Hz).

HRMS (ESI) calcd for  $\text{C}_{10}\text{H}_8\text{ClF}_3\text{NO}_2\text{S}^+$  [ $\text{M}-\text{N}_2+\text{H}$ ] $^+$  297.9911, found 297.9907.

**Synthesis of Phenyl  
(*E*)-3-(4-chlorophenyl)-4,4,4-trifluorobut-2-ene-2-sulfonate (9)**

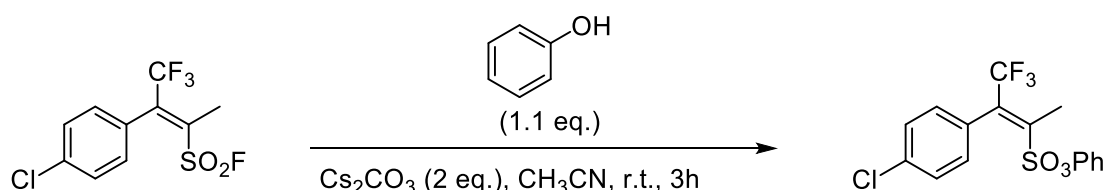

A mixture of **3f** (60.4 mg, 0.2 mmol, 1.0 equiv.), phenol (20.7 mg, 0.22 mmol), and  $\text{Cs}_2\text{CO}_3$  (130.3 mg, 0.4 mmol) in  $\text{CH}_3\text{CN}$  (1 mL) was stirred at room temperature for 3 h. EtOAc (10 mL) and water (8 mL) were added. The two layers were separated and the aqueous layer was extracted with EtOAc (2  $\times$  8 mL). The combined organic layers were washed with brine, dried over  $\text{Na}_2\text{SO}_4$ , and concentrated. The residue was purified by flash chromatography on silica gel (5:1 petroleum ether/EtOAc) to afford **9** (62.5 mg, 83% yield) as a white solid. **m.p.** 82.4–84.1  $^\circ\text{C}$ .

$^1\text{H}$  NMR (300 MHz,  $\text{CDCl}_3$ )  $\delta$  7.47-7.34 (m, 3H), 7.23 (d, 2H,  $J$  = 8.6 Hz), 7.12-7.05 (m, 2H), 6.73 (d, 2H,  $J$  = 8.6 Hz), 2.59 (q, 3H,  $J$  = 2.5 Hz).

$^{13}\text{C}$  NMR (101 MHz,  $\text{CDCl}_3$ )  $\delta$  148.7, 142.2 (q,  $J$  = 2.2 Hz), 139.8 (q,  $J$  = 31.7 Hz), 135.5, 130.0, 129.8, 129.4 (q,  $J$  = 1.1 Hz), 128.2, 127.7, 122.2, 122.0 (q,  $J$  = 279.0 Hz), 17.0 (q,  $J$  = 2.9 Hz).

$^{19}\text{F}$  NMR (282 MHz,  $\text{CDCl}_3$ )  $\delta$  -59.1 (q,  $J$  = 2.5 Hz).

HRMS (ESI) calcd for  $\text{C}_{16}\text{H}_{12}\text{ClF}_3\text{NaO}_3\text{S}^+$  [ $\text{M}+\text{Na}$ ] $^+$  399.0040, found 399.0038.

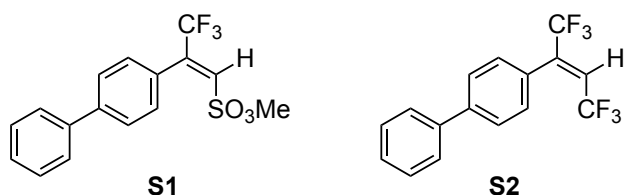

Following the general procedure A, the crude product was purified by flash chromatography on silica gel (100:1 to 50:1 petroleum ether/EtOAc) to afford **S1** (25.5 mg, 37%) and **S2** (24.5 mg, 39% yield) as white solids.

**Methyl (E)-3,3,3-Trifluoro-2-([1,1'-biphenyl]-4-yl)prop-1-ene-1-sulfonate (S1)**

**m.p.** 117.9–119.3 °C.

**<sup>1</sup>H NMR** (300 MHz, CDCl<sub>3</sub>) δ 7.69 (d, 2H, *J* = 8.5 Hz), 7.62 (d, 2H, *J* = 6.9 Hz), 7.51-7.35 (m, 4H), 3.39 (t, 1H, *J* = 7.2 Hz), 7.07 (q, 1H, *J* = 1.3 Hz), 3.79 (s, 3H).

**<sup>13</sup>C NMR** (101 MHz, CDCl<sub>3</sub>) δ 143.4, 143.3 (q, *J* = 32.0 Hz), 139.8, 129.3, 129.2 (q, *J* = 5.4 Hz), 128.9, 128.0, 127.2, 127.1, 126.7, 121.6 (q, *J* = 276.6 Hz), 56.7.

**<sup>19</sup>F NMR** (282 MHz, CDCl<sub>3</sub>) δ -67.2.

**HRMS** (ESI) calcd for C<sub>16</sub>H<sub>13</sub>F<sub>3</sub>NaO<sub>3</sub>S<sup>+</sup> [M+Na]<sup>+</sup> 365.0430, found 365.0423.

**(E)-4-(1,1,1,4,4,4-Hexafluoro-3-methylbut-2-en-2-yl)-1,1'-biphenyl (S2)**

**<sup>1</sup>H NMR** (300 MHz, CDCl<sub>3</sub>) δ 7.65 (d, 2H, *J* = 8.3 Hz), 7.61 (d, 2H, *J* = 8.0 Hz), 7.46 (t, 2H, *J* = 7.5 Hz), 7.42-7.34 (m, 3H), 6.52 (qq, 1H, *J* = 7.3, 1.4 Hz).

**<sup>19</sup>F NMR** (282 MHz, CDCl<sub>3</sub>) δ -57.9 (dq, *J* = 7.3, 1.4 Hz), -68.1.

The <sup>1</sup>H NMR and <sup>19</sup>F NMR spectral data correspond well to those previously reported.<sup>15a</sup>

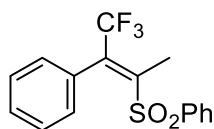

**(E)-(1,1,1-Trifluoro-3-(phenylsulfonyl)but-2-en-2-yl)benzene (S3)**

Following the general procedure A, the crude product was purified by flash chromatography on silica gel (80:1 petroleum ether/EtOAc) to afford **S3** as a white solid (20.4 mg, 31% yield).

**<sup>1</sup>H NMR** (300 MHz, CDCl<sub>3</sub>) δ 7.50 (tt, 1H, *J* = 7.2, 1.6 Hz), 7.41-7.27 (m, 5 H), 7.20 (dd, 2H, *J* = 7.8, 7.2 Hz), 6.94 (d, 2H, *J* = 7.8 Hz), 2.50 (q, 3H, *J* = 2.5 Hz).

**<sup>13</sup>C NMR** (101 MHz, CDCl<sub>3</sub>) δ 148.3 (q, *J* = 2.3 Hz), 139.5, 138.4 (q, *J* = 31.5 Hz), 133.3, 130.6 (q, *J* = 1.3 Hz), 129.8, 128.9, 128.8, 127.8, 127.6, 122.4 (q, *J* = 278.2 Hz), 15.9 (q, *J* = 2.7 Hz).

**<sup>19</sup>F NMR** (282 MHz, CDCl<sub>3</sub>) δ -58.9 (q, *J* = 2.5 Hz).

**HRMS** (ESI) calcd for C<sub>16</sub>H<sub>13</sub>F<sub>3</sub>NaO<sub>2</sub>S<sup>+</sup> [M+Na]<sup>+</sup> 349.0481, found 349.0480.

## V. Additional substrates explored

(1)

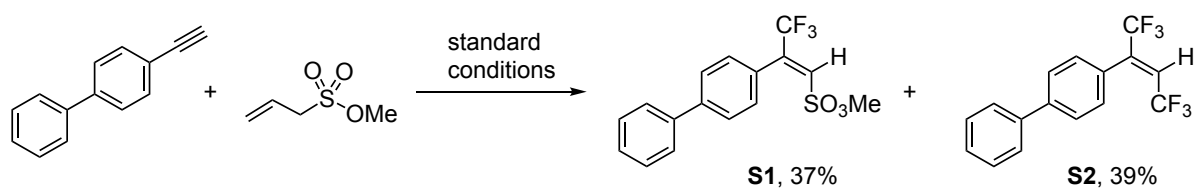

(2)

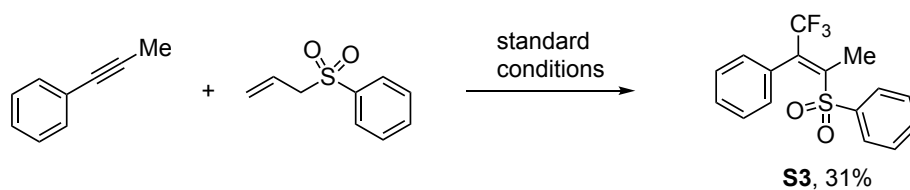

(3)

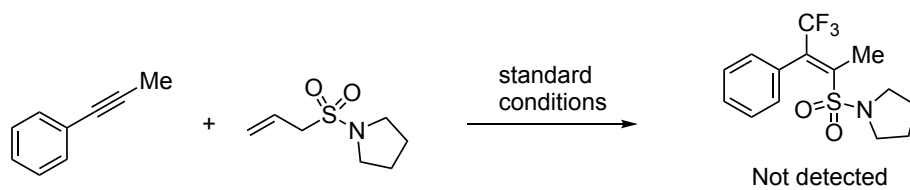

(4)

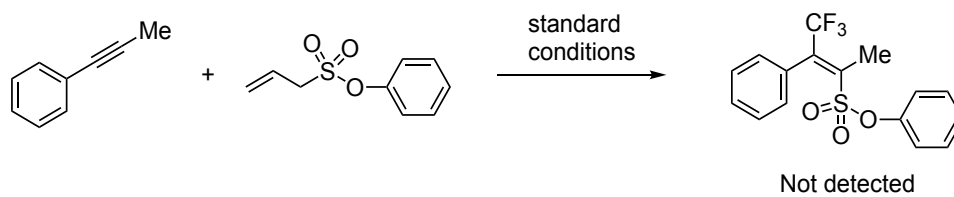

(5)

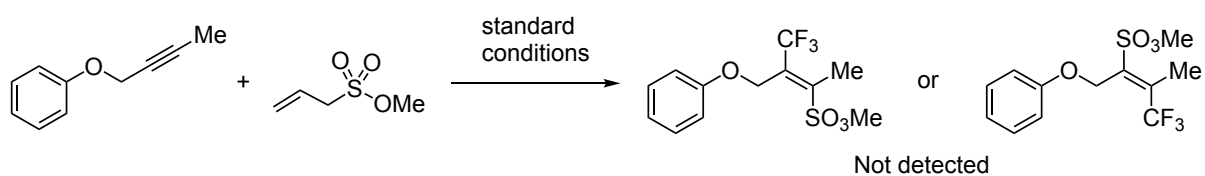

## VI. Single Crystal X-Ray Data

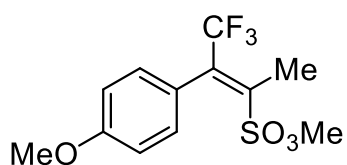

Structure of **3a**

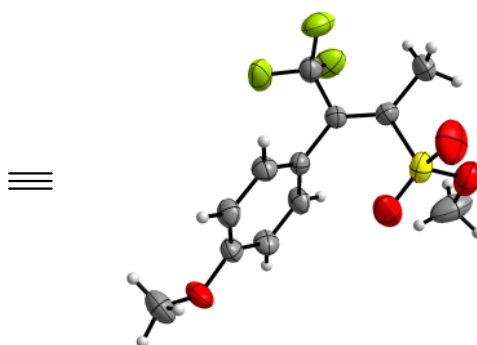

|                                             |                                                                 |
|---------------------------------------------|-----------------------------------------------------------------|
| CDCC                                        | <b>2083910</b>                                                  |
| Identification code                         | <b>3a</b>                                                       |
| Empirical formula                           | C <sub>12</sub> H <sub>13</sub> F <sub>3</sub> O <sub>4</sub> S |
| Formula weight                              | 310.28                                                          |
| Temperature/K                               | 296.15                                                          |
| Crystal system                              | monoclinic                                                      |
| Space group                                 | P2 <sub>1</sub>                                                 |
| a/Å                                         | 10.086(2)                                                       |
| b/Å                                         | 5.508(2)                                                        |
| c/Å                                         | 12.766(3)                                                       |
| α/°                                         | 90                                                              |
| β/°                                         | 108.14(3)                                                       |
| γ/°                                         | 90                                                              |
| Volume/Å <sup>3</sup>                       | 674.0(3)                                                        |
| Z                                           | 2                                                               |
| ρ <sub>calc</sub> /cm <sup>3</sup>          | 1.529                                                           |
| μ/mm <sup>-1</sup>                          | 0.286                                                           |
| F (000)                                     | 320.0                                                           |
| Crystal size/mm <sup>3</sup>                | 0.13 × 0.12 × 0.10                                              |
| Radiation                                   | MoKα (λ = 0.71073)                                              |
| 2θ range for data collection/°              | 4.25 to 55.036                                                  |
| Index ranges                                | -13 ≤ h ≤ 13, -4 ≤ k ≤ 7, -16 ≤ l ≤ 15                          |
| Reflections collected                       | 5559                                                            |
| Independent reflections                     | 2333 [R <sub>int</sub> = 0.0450, R <sub>sigma</sub> = 0.0529]   |
| Data/restraints/parameters                  | 2333/1/185                                                      |
| Goodness-of-fit on F <sup>2</sup>           | 1.038                                                           |
| Final R indexes [I > 2σ (I)]                | R <sub>1</sub> = 0.0576, wR <sub>2</sub> = 0.1507               |
| Final R indexes [all data]                  | R <sub>1</sub> = 0.0709, wR <sub>2</sub> = 0.1614               |
| Largest diff. peak/hole / e Å <sup>-3</sup> | 0.81/-0.27                                                      |



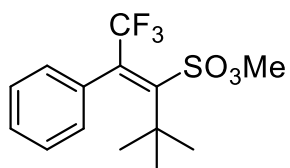

Structure of **3al**

≡

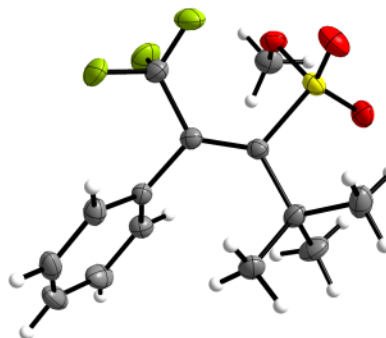

|                                             |                                                                 |
|---------------------------------------------|-----------------------------------------------------------------|
| CDCC                                        | <b>2083911</b>                                                  |
| Identification code                         | <b>3al</b>                                                      |
| Empirical formula                           | C <sub>14</sub> H <sub>17</sub> F <sub>3</sub> O <sub>3</sub> S |
| Formula weight                              | 322.33                                                          |
| Temperature/K                               | 170.00(10) K                                                    |
| Crystal system                              | monoclinic                                                      |
| Space group                                 | P 1 21/c 1                                                      |
| a/Å                                         | 6.8048(3)                                                       |
| b/Å                                         | 12.4774(5)                                                      |
| c/Å                                         | 17.3856(6)                                                      |
| α/°                                         | 90                                                              |
| β/°                                         | 93.185(3)                                                       |
| γ/°                                         | 90                                                              |
| Volume/Å <sup>3</sup>                       | 1473.87(10)                                                     |
| Z                                           | 4                                                               |
| Density (calculated)                        | 1.453 Mg/m <sup>3</sup>                                         |
| Absorption coefficient                      | 0.259 mm <sup>-1</sup>                                          |
| F (000)                                     | 672                                                             |
| Crystal size/mm <sup>3</sup>                | 0.38 × 0.32 × 0.26                                              |
| 2θ range for data collection/°              | 3.265 to 27.484                                                 |
| Index ranges                                | -8 ≤ h ≤ 8, -16 ≤ k ≤ 16, -22 ≤ l ≤ 22                          |
| Reflections collected                       | 25409                                                           |
| Independent reflections                     | 3377 [R(int) = 0.0533]                                          |
| Data/restraints/parameters                  | 3377/0/194                                                      |
| Goodness-of-fit on F <sup>2</sup>           | 1.041                                                           |
| Final R indexes [I >= 2σ (I)]               | R1 = 0.0347, wR2 = 0.0899                                       |
| Final R indexes [all data]                  | R1 = 0.0401, wR2 = 0.0935                                       |
| Largest diff. peak/hole / e Å <sup>-3</sup> | 0.337 and -0.486 e Å <sup>-3</sup>                              |

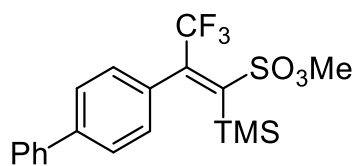

Structure of **3am**

≡

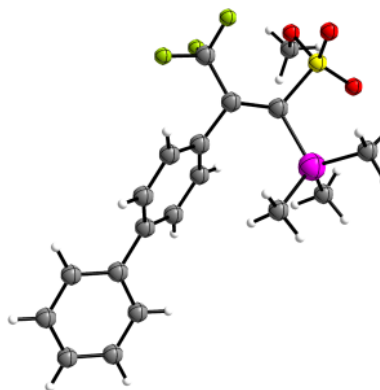

|                                             |                                                                   |
|---------------------------------------------|-------------------------------------------------------------------|
| CDCC                                        | <b>2083912</b>                                                    |
| Identification code                         | <b>3am</b>                                                        |
| Empirical formula                           | C <sub>19</sub> H <sub>21</sub> F <sub>3</sub> O <sub>3</sub> SSi |
| Formula weight                              | 414.51                                                            |
| Temperature/K                               | 193.0                                                             |
| Crystal system                              | monoclinic                                                        |
| Space group                                 | P2 <sub>1</sub> /c                                                |
| a/Å                                         | 7.4060(3)                                                         |
| b/Å                                         | 15.9894(6)                                                        |
| c/Å                                         | 34.9562(12)                                                       |
| α/°                                         | 90                                                                |
| β/°                                         | 94.362(3)                                                         |
| γ/°                                         | 90                                                                |
| Volume/Å <sup>3</sup>                       | 4127.4(3)                                                         |
| Z                                           | 8                                                                 |
| ρ <sub>calc</sub> /cm <sup>3</sup>          | 1.334                                                             |
| μ/mm <sup>-1</sup>                          | 1.519                                                             |
| F (000)                                     | 1728.0                                                            |
| Crystal size/mm <sup>3</sup>                | 0.05 × 0.01 × 0.01                                                |
| Radiation                                   | GaKα (λ = 1.34139)                                                |
| 2θ range for data collection/°              | 6.526 to 110.184                                                  |
| Index ranges                                | -9 ≤ h ≤ 8, -19 ≤ k ≤ 19, -40 ≤ l ≤ 42                            |
| Reflections collected                       | 46817                                                             |
| Independent reflections                     | 7828 [R <sub>int</sub> = 0.0959, R <sub>sigma</sub> = 0.0793]     |
| Data/restraints/parameters                  | 7828/0/495                                                        |
| Goodness-of-fit on F <sup>2</sup>           | 1.025                                                             |
| Final R indexes [I >= 2σ (I)]               | R <sub>1</sub> = 0.0718, wR <sub>2</sub> = 0.1544                 |
| Final R indexes [all data]                  | R <sub>1</sub> = 0.1485, wR <sub>2</sub> = 0.1955                 |
| Largest diff. peak/hole / e Å <sup>-3</sup> | 0.27/-0.54                                                        |

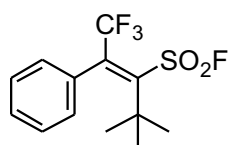

Structure of **5o**

≡

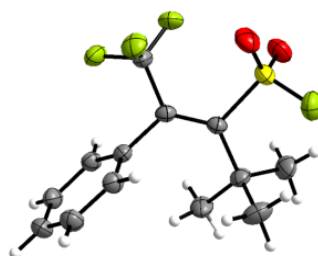

|                                             |                                                                 |
|---------------------------------------------|-----------------------------------------------------------------|
| CDCC                                        | <b>2083913</b>                                                  |
| Identification code                         | <b>5o</b>                                                       |
| Empirical formula                           | C <sub>13</sub> H <sub>14</sub> F <sub>4</sub> O <sub>2</sub> S |
| Formula weight                              | 310.30                                                          |
| Temperature/K                               | 273.15                                                          |
| Crystal system                              | monoclinic                                                      |
| Space group                                 | Pc                                                              |
| a/Å                                         | 11.1315(7)                                                      |
| b/Å                                         | 8.3917(5)                                                       |
| c/Å                                         | 15.5384(10)                                                     |
| α/°                                         | 90                                                              |
| β/°                                         | 109.425(3)                                                      |
| γ/°                                         | 90                                                              |
| Volume/Å <sup>3</sup>                       | 1368.85(15)                                                     |
| Z                                           | 4                                                               |
| ρ <sub>calc</sub> /cm <sup>3</sup>          | 1.506                                                           |
| μ/mm <sup>-1</sup>                          | 2.556                                                           |
| F (000)                                     | 640.0                                                           |
| Crystal size/mm <sup>3</sup>                | 0.11 × 0.10 × 0.09                                              |
| Radiation                                   | MoKα (λ = 1.54178)                                              |
| 2θ range for data collection/°              | 4.25 to 55.036                                                  |
| Index ranges                                | -13 ≤ h ≤ 12, -9 ≤ k ≤ 10, -16 ≤ l ≤ 18                         |
| Reflections collected                       | 8209                                                            |
| Independent reflections                     | 3662 [R <sub>int</sub> = 0.0193, R <sub>sigma</sub> = 0.0321]   |
| Data/restraints/parameters                  | 3662/3/367                                                      |
| Goodness-of-fit on F <sup>2</sup>           | 1.068                                                           |
| Final R indexes [I >= 2σ (I)]               | R <sub>1</sub> = 0.0246, wR <sub>2</sub> = 0.0623               |
| Final R indexes [all data]                  | R <sub>1</sub> = 0.0249, wR <sub>2</sub> = 0.0625               |
| Largest diff. peak/hole / e Å <sup>-3</sup> | 0.21/-0.24                                                      |

## VII. Mechanistic studies

### (1) Standard reaction in the presence of 1.5 equiv. of TEMPO

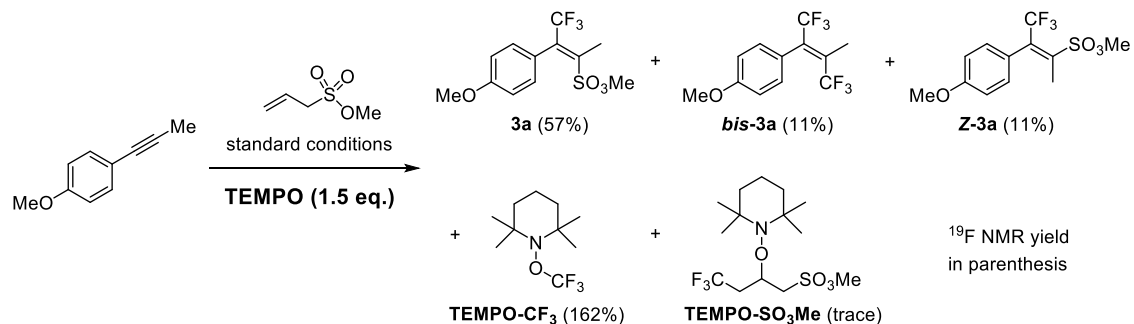

1.5 SO<sub>3</sub>Me #121 RT: 1.15 AV: 1 NL: 5.44E5  
T: FTMS + p ESI Full ms [100.0000-1500.0000]

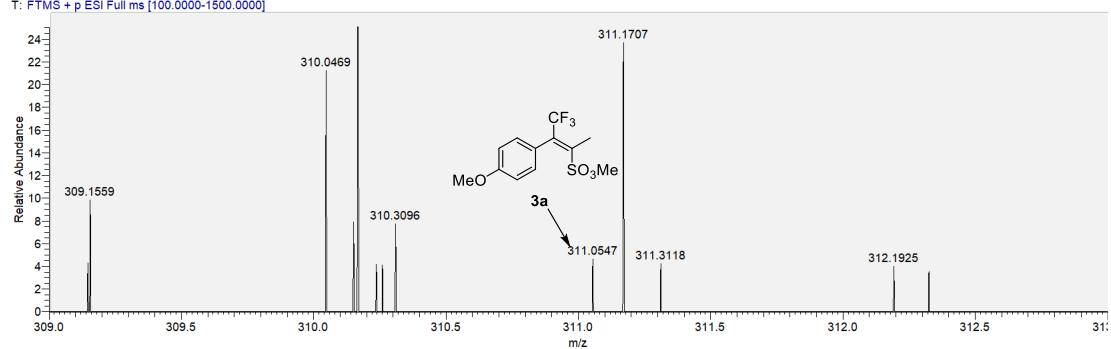

1.5 SO<sub>3</sub>Me #1-152 RT: 0.01-1.45 AV: 152 NL: 2.58E6  
T: FTMS + p ESI Full ms [100.0000-1500.0000]

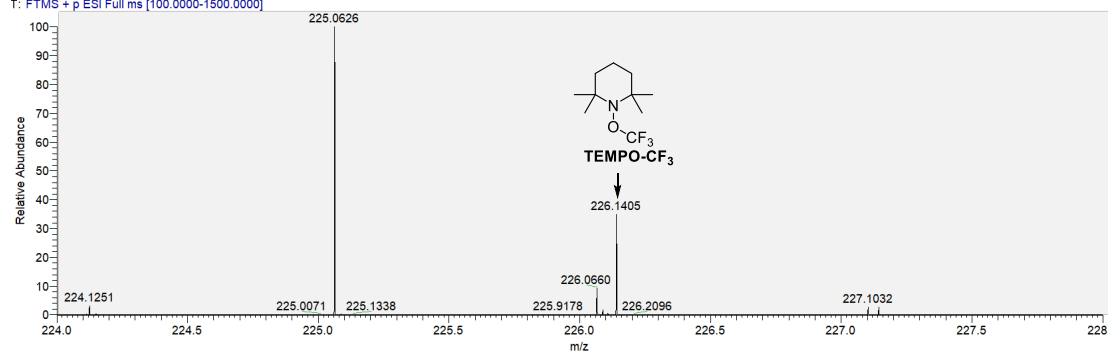

1.5 SO<sub>3</sub>Me #1-168 RT: 0.01-1.60 AV: 168 NL: 1.35E7  
T: FTMS + p ESI Full ms [100.0000-1500.0000]

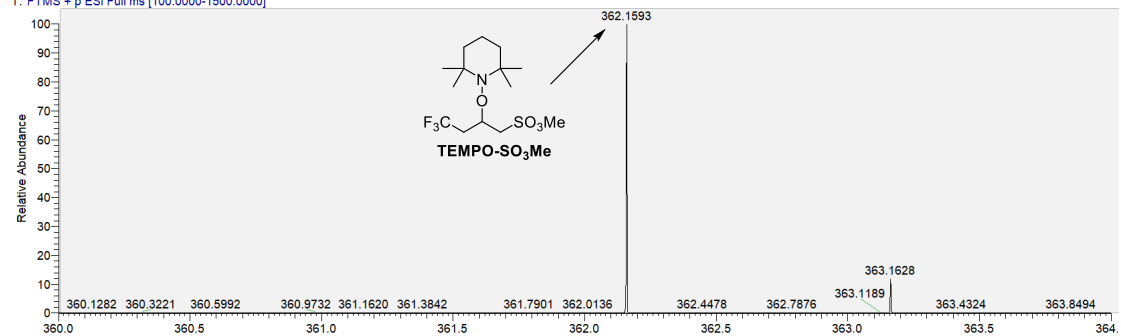

(2) Standard reaction in the presence of 4 equiv. of TEMPO

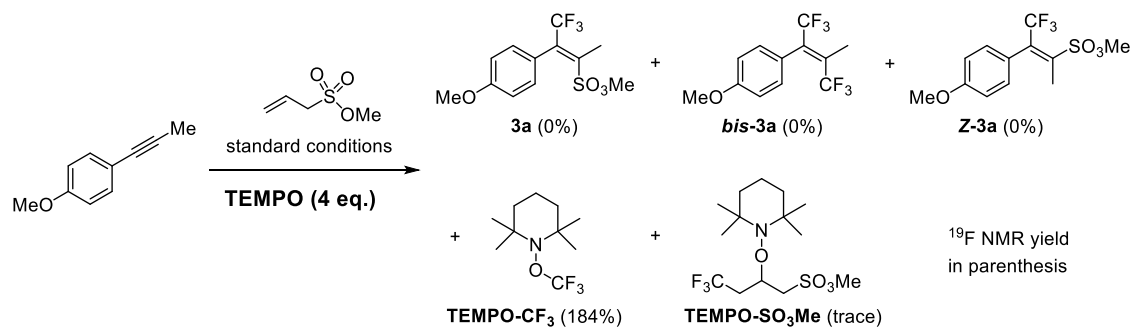

4 SO<sub>3</sub>Me #4-116 RT: 0.03-1.10 AV: 113 NL: 1.11E6  
T: FTMS + p ESI Full ms [100.0000-1500.0000]

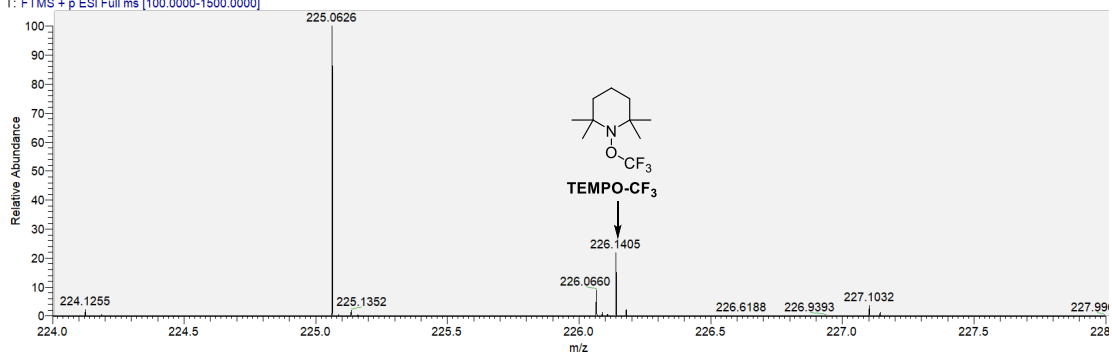

4 SO<sub>3</sub>Me #4-116 RT: 0.03-1.10 AV: 113 NL: 1.09E7  
T: FTMS + p ESI Full ms [100.0000-1500.0000]

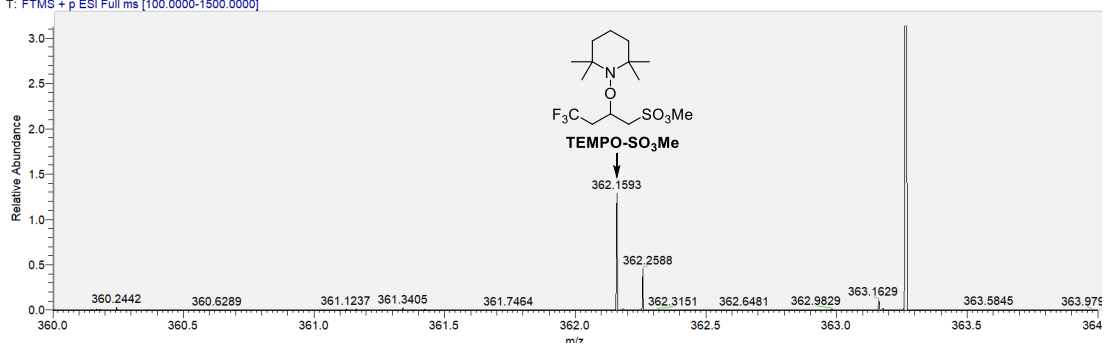

(3) Standard reaction in the presence of 1.5 equiv. of TEMPO

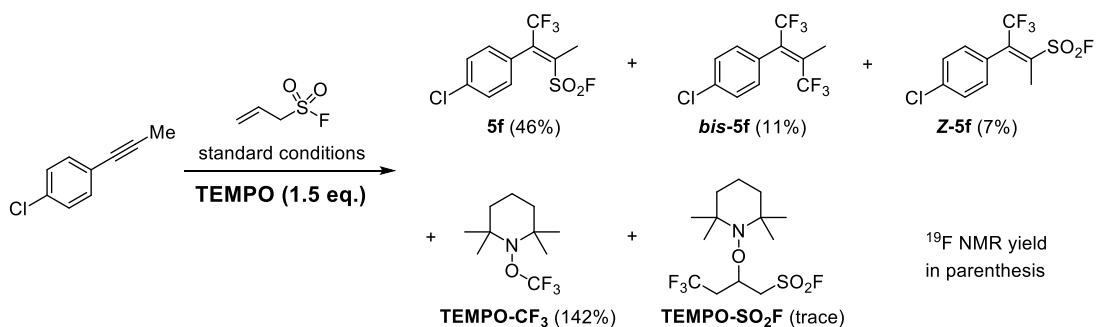

1.5 SO2F #1-151 RT: 0.01-1.44 AV: 151 NL: 2.23E6  
T: FTMS + p ESI Full ms [100.0000-1500.0000]

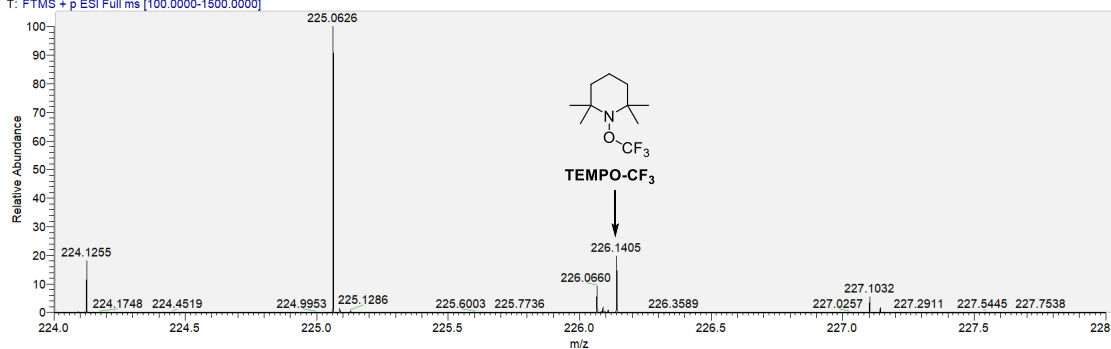

1.5 SO2F #1-151 RT: 0.01-1.44 AV: 151 NL: 9.95E4  
T: FTMS + p ESI Full ms [100.0000-1500.0000]

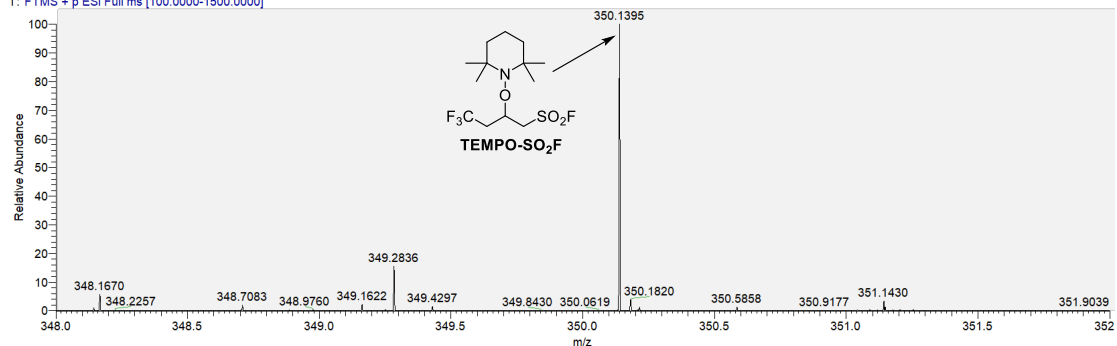

(4) Standard reaction in the presence of 4 equiv. of TEMPO

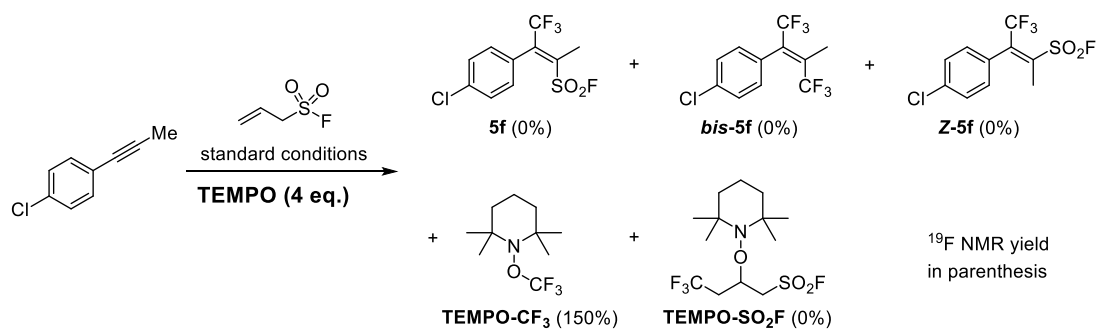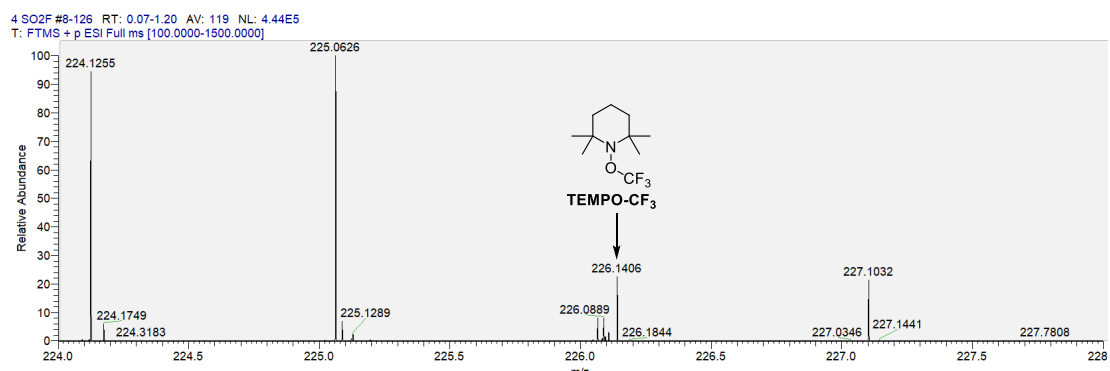

## VIII. Computational studies

### 8.1 Computational details

All calculations were carried out by using the Gaussian 09 suite of computational programs.<sup>8</sup> The obtained transition states were fully optimized at the DFT level using the M06-L functional,<sup>9</sup> which has been found reliable in completing the thermochemistry calculations of transition-metal-containing systems.<sup>10</sup> The standard 6-311G\*\* basis set<sup>11</sup> was applied for all atoms except the Cu atom, in which LANL2DZ ECP was used.<sup>12</sup> Frequencies were analytically computed at the same level of theory to get the thermodynamic corrections and to confirm whether the structures are the corresponding transition states (only one imaginary frequency). Electronic energies were obtained from single-point calculations on the M06-L/LANL2DZ(Cu)-6-311G\*\* geometries using M06-L functional with the def2-TZVPP basis set for all atoms.<sup>13</sup> The obtained Gibbs free energies in the gas phase were reported herein. All energies were reported in kcal/mol. Visualization was completed using VMD (Visual Molecular Dynamics)<sup>14</sup> and CLYview software.<sup>15</sup>

Previous studies demonstrated that a trifluoromethyl radical and  $\text{bpyCu}(\text{CF}_3)_2$  species were generated when  $\text{bpyCu}(\text{CF}_3)_3$  was exposed to light.<sup>16</sup> Moreover, the binding of sulfate to the copper species were found to lower the overall activation energy and accelerate the reaction rate. In view that hydrogen sulfate could be generated under our reaction conditions, we use  $\text{bpyCu}(\text{CF}_3)(\text{OSO}_3\text{H})$  and trifluoromethyl radical, together with prop-1-yn-1-ylbenzene **1b** and methyl prop-2-ene-1-sulfonate **2a**, as the starting point in this calculation (Figure S1). The computational results are reported herein.



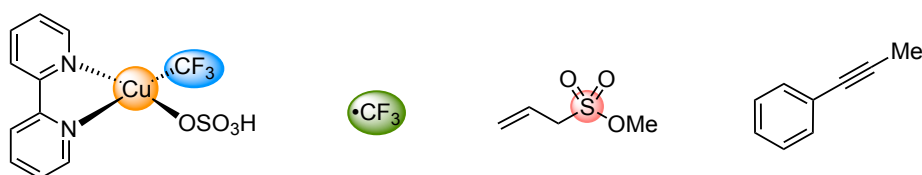

**Figure S1.** Model catalysts and substrates.

## 8.2. Computational results and discussion

### 8.2.1 The potential energy surface leading to the major product

As shown in Figure S2, the alkoxy sulfonyl trifluoromethylation process proceeded facilely through the addition of trifluoromethyl radical into the unsaturated double or triple bond. The activation energy of **TS1**, which corresponded to the addition of  $\text{CF}_3\cdot$  into allyl sulfonate, was calculated to be 9.2 kcal/mol. This was 0.8 kcal/mol lower than the energy of **TSA** that was formed from the addition of  $\text{CF}_3\cdot$  to alkynyl carbon. This disparity might originate from the steric effect of the methyl group on the alkyne and allow for the former process more feasible herein. Importantly, the resulting intermediates after the addition steps, **INT1** and **INTA**, were far more stable than the corresponding transition states **TS1** and **TSA** by > 30 kcal/mol. Such high backward energy rendered the addition processes irreversible.

Along the pathway of product formation, a secondary alkyl radical species **INT1** could be obtained *via* **TS1**. This transition state adopted a planar structure to accommodate the unpaired electron. Subsequently, sulfonyl radical **INT2** could be readily accessed *via*  $\beta$ -fragmentation by passing the energy barrier of **TS2** in 12.2 kcal/mol. Free sulfonyl radical **INT2**, together with 4,4,4-trifluoromethyl-1-butene, was found to be more stable than **INT1** by 3.0 kcal/mol. The addition of sulfonyl

radical **INT2** onto the carbon atom adjacent to methyl in alkyne required activation energy of 12.5 kcal/mol relative to **INT2**. Then, a linear allenyl radical intermediate **INT3** was obtained, which would recombine with the copper(II) species to form intermediate **INT4E**. This intermediate was 37.9 kcal/mol more stabilized than the starting point. Eventually, the reductive elimination proceeded through **TS4E** in energetic barrier of 12.3 kcal/mol to afford the Cu(I) species **INT5E** coordinated to the double bond in product.

In conclusion, the formation of the product could be achieved *via* the sequential generation of sulfonyl radical, addition of sulfonyl radical into the triple bond, and the reductive elimination. Among these, the preference of the S-addition product was mainly determined by the energy difference between **TS1** and **TSA**, which would irreversibly lead to the corresponding product. The following steps could easily proceed, because the activation energy barriers of the following transition states were all less than 13 kcal/mol.

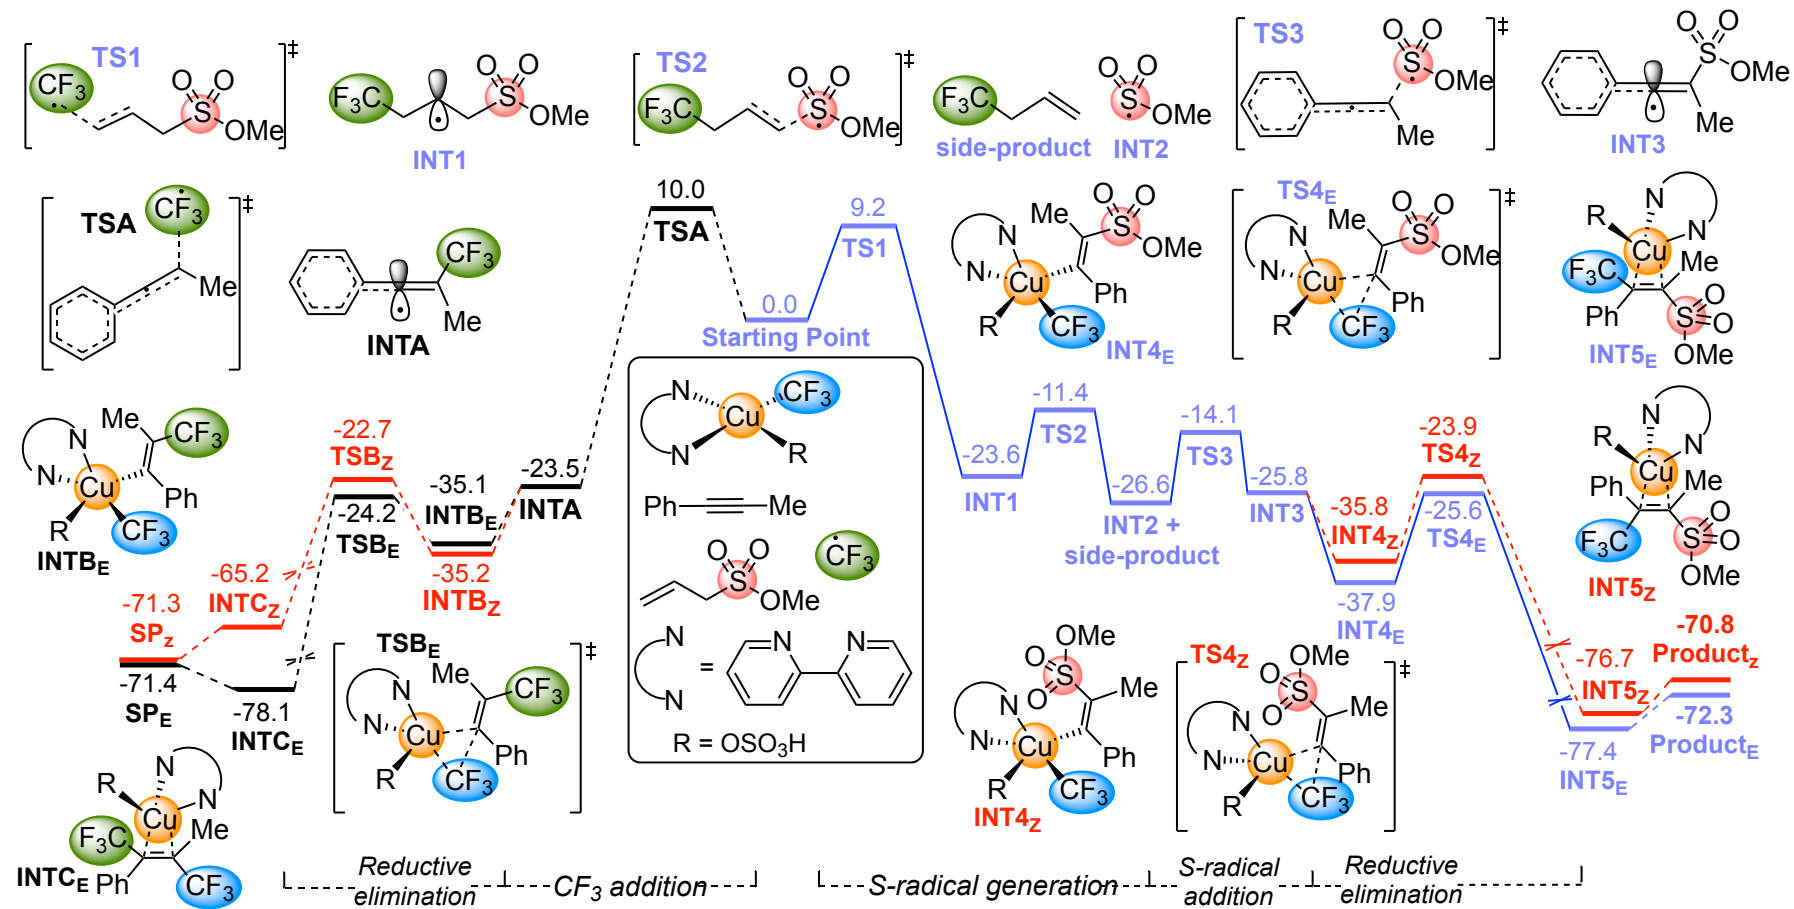

**Figure S2.** The potential energy surface leading to the products.

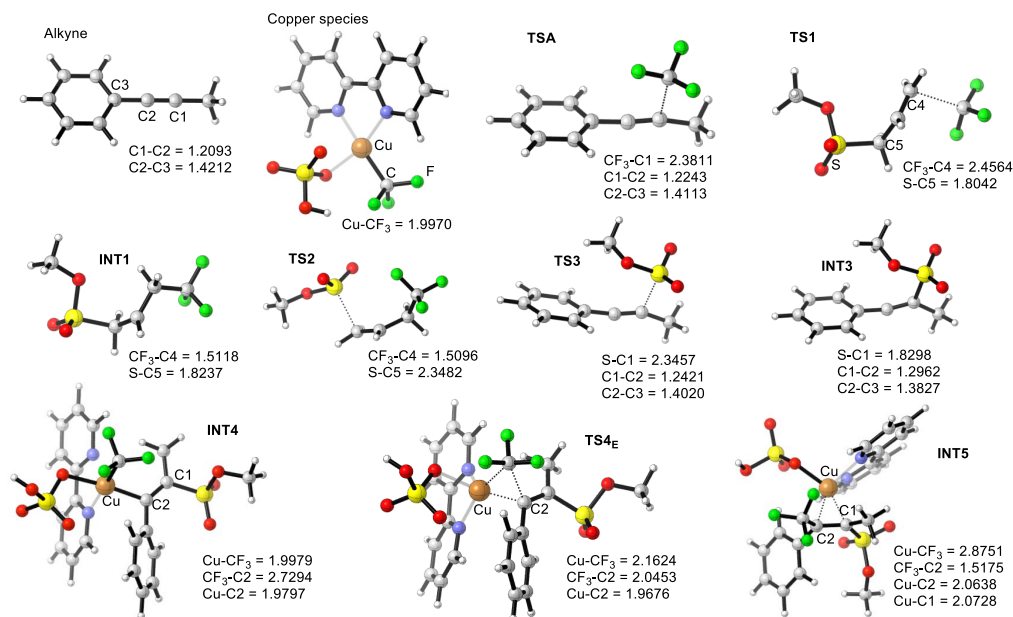

**Figure S3.** The optimized geometric structures of selected intermediates and transition states. Bond lengths are shown in angstroms (Å).

### 8.2.2 Other competing reaction pathways

Theoretically, both *sp*-hybridized carbons on the alkynyl substrate were prone to be attacked by a radical species (**Figure S4**). Besides **TSA** and **TS3**, the transition states **TS1'** and **TS3'** were depicted by the addition of CF<sub>3</sub>• and MeOSO<sub>2</sub>• into the alkynyl carbon adjacent to the phenyl group, respectively. The latter cases were calculated to be more energy-demanding with 15.0 kcal/mol for **TS1'** and -12.4 kcal/mol for **TS3'**, respectively.

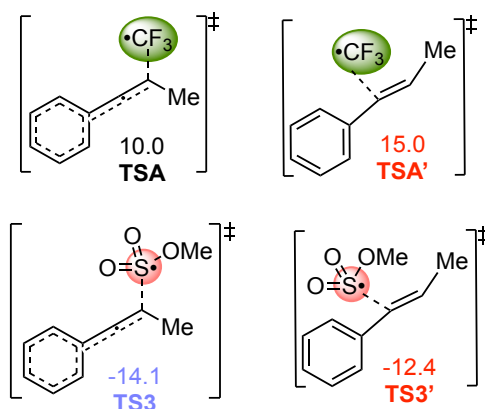

**Figure S4.** Comparison of the radical addition steps.

Furthermore, the transition states of reductive elimination steps, which cor-

responded to the formation of *E/Z* isomers in this difunctionalization process, were shown in **Figure S5**. No matter the reactions were triggered by CF<sub>3</sub> radical or sulfonyl radical, the transition states leading to the formation of *E*-isomers were uniformly favored by approximately 1.5 kcal/mol. This was consistent with the experimental observation.

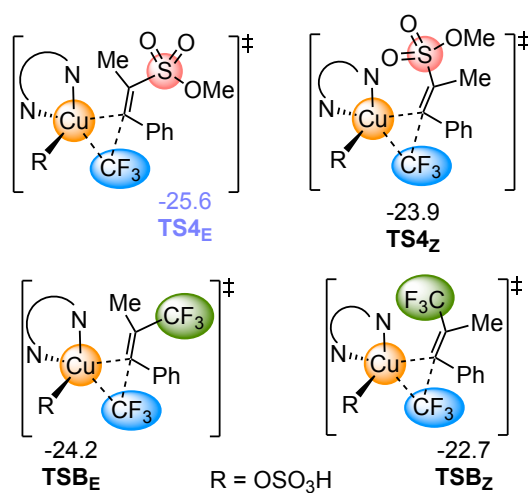

**Figure S5.** Comparison of the reductive elimination steps.

### 8.3. Cartesian coordinates

#### Alkyne

|   |           |           |           |
|---|-----------|-----------|-----------|
| C | 0.749193  | 1.207135  | -0.000558 |
| C | 0.032248  | -0.000210 | -0.000987 |
| C | 0.749490  | -1.207353 | -0.000553 |
| C | 2.136429  | -1.202745 | 0.000396  |
| C | 2.835822  | 0.000179  | 0.000904  |
| C | 2.136098  | 1.202932  | 0.000394  |
| H | 0.201512  | 2.143618  | -0.000834 |
| H | 0.202021  | -2.143965 | -0.000825 |
| H | 2.675699  | -2.144732 | 0.000821  |
| H | 3.920863  | 0.000338  | 0.001751  |
| H | 2.675091  | 2.145079  | 0.000817  |
| C | -1.388897 | -0.000232 | -0.001295 |

|   |           |           |           |
|---|-----------|-----------|-----------|
| C | -2.598164 | 0.000415  | -0.000915 |
| C | -4.043428 | 0.000215  | 0.001224  |
| H | -4.440892 | -0.424369 | 0.927931  |
| H | -4.443056 | 1.013570  | -0.094173 |
| H | -4.443982 | -0.591554 | -0.827149 |

**CF<sub>3</sub> radical**

|   |          |           |           |
|---|----------|-----------|-----------|
| C | 0.000000 | 0.000000  | 0.335151  |
| F | 0.000000 | 1.256101  | -0.074478 |
| F | 1.087815 | -0.628050 | -0.074478 |

**Sulfonate**

|   |           |           |           |
|---|-----------|-----------|-----------|
| C | -3.287458 | -0.365804 | 0.257941  |
| H | -3.232097 | -1.365186 | 0.679921  |
| H | -4.201581 | 0.189128  | 0.433979  |
| C | -2.284177 | 0.151336  | -0.441410 |
| H | -2.352376 | 1.158769  | -0.845610 |
| C | -1.013989 | -0.575876 | -0.709578 |
| H | -1.033294 | -1.606909 | -0.352740 |
| H | -0.735206 | -0.561050 | -1.766434 |
| S | 0.358341  | 0.230062  | 0.136781  |
| O | 0.292230  | -0.008985 | 1.562325  |
| O | 0.516825  | 1.577207  | -0.370080 |
| O | 1.521824  | -0.724376 | -0.512408 |
| C | 2.853199  | -0.409999 | -0.078057 |
| H | 3.500935  | -1.117513 | -0.591184 |
| H | 3.120648  | 0.610355  | -0.362293 |
| H | 2.947036  | -0.537289 | 1.003791  |

**TS1**

|   |           |           |           |
|---|-----------|-----------|-----------|
| C | 1.132310  | 1.122751  | 0.501153  |
| H | 1.138094  | 1.493178  | -0.520117 |
| H | 1.626304  | 1.738076  | 1.244217  |
| C | 0.365458  | 0.078683  | 0.855991  |
| H | 0.290449  | -0.221317 | 1.897578  |
| C | -0.376692 | -0.745930 | -0.128296 |
| H | -0.128640 | -0.508500 | -1.164850 |
| H | -0.235682 | -1.820729 | 0.022616  |
| S | -2.163924 | -0.540059 | 0.008021  |
| O | -2.563107 | -0.537321 | 1.400903  |
| O | -2.821806 | -1.409748 | -0.941885 |
| O | -2.201528 | 0.997674  | -0.549660 |
| C | -3.410610 | 1.713907  | -0.259896 |
| H | -3.259260 | 2.711179  | -0.666283 |
| H | -4.268096 | 1.244017  | -0.748782 |
| H | -3.576537 | 1.767660  | 0.818262  |
| C | 3.274535  | 0.078547  | -0.094070 |
| F | 3.853234  | -0.375713 | 1.005296  |
| F | 2.928053  | -0.933002 | -0.880991 |
| F | 4.087343  | 0.902581  | -0.739321 |

### INT1

|   |           |           |           |
|---|-----------|-----------|-----------|
| C | 1.414553  | 0.552464  | 0.459545  |
| H | 0.975444  | 1.222329  | -0.285697 |
| H | 1.574070  | 1.133482  | 1.372331  |
| C | 0.543892  | -0.624127 | 0.706885  |
| H | 0.576826  | -1.119067 | 1.671149  |
| C | -0.397214 | -1.118103 | -0.306046 |
| H | -0.141994 | -0.828379 | -1.328217 |
| H | -0.544850 | -2.201119 | -0.273031 |

|   |           |           |           |
|---|-----------|-----------|-----------|
| S | -2.083143 | -0.475599 | -0.040215 |
| O | -2.473082 | -0.666708 | 1.341109  |
| O | -2.956125 | -0.893156 | -1.115510 |
| O | -1.679010 | 1.103790  | -0.252166 |
| C | -2.735069 | 2.029662  | 0.047334  |
| H | -2.312973 | 3.017560  | -0.121837 |
| H | -3.586399 | 1.873807  | -0.620047 |
| H | -3.049350 | 1.930642  | 1.089127  |
| C | 2.780434  | 0.147753  | -0.046711 |
| F | 3.417713  | -0.648681 | 0.829225  |
| F | 2.691122  | -0.532077 | -1.208322 |
| F | 3.565129  | 1.214427  | -0.266885 |

**TSA**

|   |           |           |           |
|---|-----------|-----------|-----------|
| C | -1.298391 | 0.553304  | -0.132812 |
| C | -1.833249 | -0.239380 | -1.165590 |
| C | -2.086766 | 0.801084  | 1.006094  |
| C | -3.111291 | -0.763188 | -1.057419 |
| C | -3.364463 | 0.273247  | 1.102916  |
| C | -3.882770 | -0.509207 | 0.074087  |
| H | -1.226265 | -0.438936 | -2.042102 |
| H | -1.679015 | 1.409611  | 1.805924  |
| H | -3.509409 | -1.376126 | -1.859369 |
| H | -3.960947 | 0.471824  | 1.987284  |
| H | -4.883191 | -0.920925 | 0.154496  |
| C | 0.005291  | 1.082962  | -0.240639 |
| C | 1.193946  | 1.368821  | -0.305569 |
| C | 2.224324  | -0.718611 | 0.195229  |
| F | 3.121286  | -0.999028 | -0.751497 |
| F | 2.836998  | -0.651988 | 1.375369  |



|   |          |           |           |
|---|----------|-----------|-----------|
| F | 1.292184 | -1.658200 | 0.222512  |
| C | 2.435248 | 2.105153  | -0.486338 |
| H | 3.050973 | 2.073738  | 0.416875  |
| H | 3.031049 | 1.685390  | -1.300727 |
| H | 2.231303 | 3.153250  | -0.719586 |

**INTA**

|   |           |           |           |
|---|-----------|-----------|-----------|
| C | -1.298772 | 0.040594  | 0.172608  |
| C | -2.036328 | 1.220634  | -0.144314 |
| C | -2.017898 | -1.187634 | 0.279892  |
| C | -3.401116 | 1.161501  | -0.333566 |
| C | -3.382537 | -1.217748 | 0.085436  |
| C | -4.087779 | -0.050694 | -0.221766 |
| H | -1.503412 | 2.160961  | -0.234321 |
| H | -1.470129 | -2.093679 | 0.514533  |
| H | -3.944959 | 2.069753  | -0.573024 |
| H | -3.911919 | -2.161403 | 0.171820  |
| H | -5.161200 | -0.085661 | -0.372798 |
| C | 0.058382  | 0.077577  | 0.355285  |
| C | 1.327521  | 0.120612  | 0.645255  |
| C | 2.354410  | -0.078058 | -0.438051 |
| F | 3.158704  | 1.002100  | -0.547637 |
| F | 3.162918  | -1.122763 | -0.153159 |
| F | 1.819863  | -0.303239 | -1.641726 |
| C | 1.905724  | 0.358339  | 2.014648  |
| H | 2.523344  | -0.490347 | 2.321115  |
| H | 2.547537  | 1.243632  | 2.010887  |
| H | 1.117731  | 0.501117  | 2.751931  |

**TSA'**

|   |           |           |           |
|---|-----------|-----------|-----------|
| C | -0.916785 | 0.484406  | -0.116949 |
| C | -1.865875 | 1.342332  | 0.460639  |
| C | -1.347145 | -0.744728 | -0.632972 |
| C | -3.202847 | 0.978483  | 0.516702  |
| C | -2.687478 | -1.100496 | -0.576495 |
| C | -3.619936 | -0.243896 | -0.001636 |
| H | -1.535721 | 2.294122  | 0.863156  |
| H | -0.627427 | -1.415732 | -1.087311 |
| H | -3.923205 | 1.652676  | 0.968702  |
| H | -3.004714 | -2.054587 | -0.984662 |
| H | -4.666278 | -0.527273 | 0.043339  |
| C | 0.455500  | 0.911941  | -0.183131 |
| C | 1.344371  | 1.760836  | -0.273472 |
| C | 1.625199  | -1.020182 | 0.187288  |
| F | 1.044390  | -1.780150 | 1.110146  |
| F | 1.778799  | -1.727408 | -0.935208 |
| F | 2.823502  | -0.636131 | 0.621397  |
| C | 2.578083  | 2.502904  | -0.353916 |
| H | 2.673414  | 3.210443  | 0.474806  |
| H | 3.442013  | 1.830028  | -0.316290 |
| H | 2.643168  | 3.073911  | -1.285095 |

## **TS2**

|   |           |          |           |
|---|-----------|----------|-----------|
| C | -1.857975 | 0.930356 | -0.732457 |
| H | -2.611090 | 1.670974 | -1.030039 |
| H | -1.474544 | 0.465403 | -1.644726 |
| C | -0.765147 | 1.558018 | 0.057339  |
| H | -0.989407 | 1.822764 | 1.087905  |
| C | 0.522514  | 1.672696 | -0.404879 |
| H | 0.723344  | 1.592031 | -1.470419 |

|   |           |           |           |
|---|-----------|-----------|-----------|
| H | 1.244295  | 2.249216  | 0.165574  |
| S | 1.562000  | -0.410634 | -0.099882 |
| O | 1.072803  | -1.278559 | -1.156606 |
| O | 1.561301  | -0.815706 | 1.301203  |
| O | 3.127184  | -0.057020 | -0.550651 |
| C | 3.969348  | 0.445489  | 0.489466  |
| H | 4.946779  | 0.581654  | 0.029639  |
| H | 3.612609  | 1.409997  | 0.866019  |
| H | 4.035922  | -0.261625 | 1.318081  |
| C | -2.585994 | -0.128252 | 0.060136  |
| F | -1.746921 | -1.074097 | 0.506700  |
| F | -3.196906 | 0.402110  | 1.139475  |
| F | -3.530251 | -0.730217 | -0.678743 |

**Side-product**

|   |           |           |           |
|---|-----------|-----------|-----------|
| C | 0.445703  | 0.286203  | -0.791061 |
| H | 0.596685  | 1.368092  | -0.825405 |
| H | 0.236778  | -0.049409 | -1.813053 |
| C | 1.642680  | -0.408332 | -0.229444 |
| H | 1.574329  | -1.491916 | -0.153498 |
| C | 2.744045  | 0.215601  | 0.168709  |
| H | 2.838658  | 1.296385  | 0.110154  |
| H | 3.594038  | -0.326526 | 0.566912  |
| C | -0.806632 | 0.028863  | 0.006466  |
| F | -1.125342 | -1.281275 | 0.027469  |
| F | -0.680513 | 0.425167  | 1.283835  |
| F | -1.860285 | 0.686036  | -0.512763 |

**INT2**

|   |          |          |           |
|---|----------|----------|-----------|
| S | 0.579816 | 0.059769 | -0.265679 |
|---|----------|----------|-----------|

|   |           |           |           |
|---|-----------|-----------|-----------|
| O | 0.397425  | 1.442938  | 0.187213  |
| O | 1.654576  | -0.791607 | 0.229495  |
| O | -0.811297 | -0.791804 | 0.073674  |
| C | -2.028328 | -0.037275 | 0.038315  |
| H | -2.806370 | -0.746651 | 0.315069  |
| H | -1.995517 | 0.790914  | 0.748010  |
| H | -2.230841 | 0.346869  | -0.965152 |

### TS3

|   |           |           |           |
|---|-----------|-----------|-----------|
| C | 1.466237  | 0.779304  | 0.026551  |
| C | 1.952372  | 0.285014  | 1.255390  |
| C | 2.277325  | 0.665327  | -1.122830 |
| C | 3.201020  | -0.307638 | 1.321808  |
| C | 3.525879  | 0.074134  | -1.040343 |
| C | 3.992843  | -0.414712 | 0.179014  |
| H | 1.321519  | 0.355537  | 2.134518  |
| H | 1.905072  | 1.044131  | -2.068935 |
| H | 3.561420  | -0.694091 | 2.269171  |
| H | 4.141668  | -0.008673 | -1.929833 |
| H | 4.971860  | -0.878615 | 0.238411  |
| C | 0.187037  | 1.347119  | -0.055995 |
| C | -1.030585 | 1.588639  | -0.098582 |
| C | -2.166834 | 2.505137  | -0.182248 |
| H | -2.807161 | 2.255194  | -1.032410 |
| H | -2.781265 | 2.446650  | 0.719991  |
| H | -1.817443 | 3.532740  | -0.300598 |
| S | -2.157641 | -0.454883 | 0.138314  |
| O | -2.884784 | -0.815292 | -1.081439 |
| O | -2.805956 | -0.490763 | 1.442198  |
| O | -0.866927 | -1.485180 | 0.301630  |

|   |           |           |           |
|---|-----------|-----------|-----------|
| C | -0.271858 | -1.915591 | -0.926338 |
| H | 0.693098  | -2.341599 | -0.650362 |
| H | -0.896129 | -2.664978 | -1.417710 |
| H | -0.109678 | -1.078694 | -1.612950 |

**TS3'**

|   |           |           |           |
|---|-----------|-----------|-----------|
| C | -1.188853 | 0.528357  | -0.214170 |
| C | -2.123429 | 1.248450  | 0.546251  |
| C | -1.597777 | -0.640552 | -0.866648 |
| C | -3.436153 | 0.812575  | 0.640137  |
| C | -2.915051 | -1.066964 | -0.768549 |
| C | -3.837285 | -0.346221 | -0.017931 |
| H | -1.803194 | 2.150944  | 1.057284  |
| H | -0.884768 | -1.208811 | -1.453070 |
| H | -4.148478 | 1.379184  | 1.231146  |
| H | -3.221092 | -1.971786 | -1.283050 |
| H | -4.864938 | -0.686416 | 0.056378  |
| C | 0.164249  | 1.033694  | -0.301673 |
| C | 0.883300  | 2.059843  | -0.281338 |
| C | 2.046581  | 2.906874  | -0.302353 |
| H | 2.061599  | 3.544453  | -1.190952 |
| H | 2.089869  | 3.554265  | 0.578142  |
| H | 2.951175  | 2.285428  | -0.310851 |
| S | 1.606236  | -0.734850 | -0.354316 |
| O | 2.899804  | -0.171340 | 0.023412  |
| O | 1.489267  | -1.631260 | -1.495800 |
| O | 1.033679  | -1.642286 | 0.917121  |
| C | 1.187315  | -1.039523 | 2.202657  |
| H | 0.774627  | -1.755217 | 2.911591  |
| H | 2.240357  | -0.853361 | 2.425231  |

|   |          |           |          |
|---|----------|-----------|----------|
| H | 0.625690 | -0.101188 | 2.271037 |
|---|----------|-----------|----------|

### INT3

|   |           |           |           |
|---|-----------|-----------|-----------|
| C | 1.428385  | 0.649638  | -0.116800 |
| C | 2.029362  | 0.594980  | 1.169867  |
| C | 2.199871  | 0.240141  | -1.237888 |
| C | 3.326664  | 0.145027  | 1.314456  |
| C | 3.495963  | -0.205891 | -1.069549 |
| C | 4.070081  | -0.256320 | 0.202307  |
| H | 1.443971  | 0.894552  | 2.031992  |
| H | 1.753680  | 0.285902  | -2.226292 |
| H | 3.768241  | 0.099096  | 2.304750  |
| H | 4.071098  | -0.516699 | -1.935628 |
| H | 5.089384  | -0.606237 | 0.325861  |
| C | 0.132346  | 1.107155  | -0.267871 |
| C | -1.162296 | 1.170782  | -0.262518 |
| C | -2.061752 | 2.323679  | -0.580428 |
| H | -2.722575 | 2.075994  | -1.415508 |
| H | -2.692830 | 2.566065  | 0.278772  |
| H | -1.473688 | 3.201512  | -0.844379 |
| S | -2.116748 | -0.313671 | 0.220821  |
| O | -2.873811 | -0.768663 | -0.929946 |
| O | -2.752822 | -0.047654 | 1.488235  |
| O | -0.938277 | -1.384699 | 0.548775  |
| C | -0.446517 | -2.154926 | -0.558871 |
| H | 0.424772  | -2.683139 | -0.174011 |
| H | -1.203110 | -2.862740 | -0.900394 |
| H | -0.144330 | -1.513022 | -1.391040 |

### CuS

|    |           |           |           |
|----|-----------|-----------|-----------|
| Cu | -0.390360 | -0.368312 | -0.529671 |
| N  | 0.924849  | 1.228414  | -0.680604 |
| C  | 0.570585  | 2.464498  | -1.037723 |
| H  | -0.463767 | 2.581243  | -1.346577 |
| C  | 1.458125  | 3.530958  | -0.987295 |
| H  | 1.130103  | 4.520669  | -1.280200 |
| C  | 2.751412  | 3.296995  | -0.542927 |
| H  | 3.470258  | 4.107029  | -0.483021 |
| C  | 3.116748  | 2.013542  | -0.161642 |
| H  | 4.118515  | 1.817669  | 0.200551  |
| C  | 2.174174  | 0.991261  | -0.239796 |
| N  | 1.405971  | -1.259148 | 0.041346  |
| C  | 2.442567  | -0.402139 | 0.162296  |
| C  | 3.672738  | -0.831994 | 0.655397  |
| H  | 4.498340  | -0.137016 | 0.746960  |
| C  | 3.828620  | -2.155473 | 1.038161  |
| H  | 4.779301  | -2.501397 | 1.428984  |
| C  | 2.753149  | -3.023622 | 0.919020  |
| H  | 2.828022  | -4.063752 | 1.211839  |
| C  | 1.557864  | -2.532577 | 0.412389  |
| H  | 0.685396  | -3.164050 | 0.292995  |
| C  | -1.671522 | -1.881217 | -0.769742 |
| F  | -1.157768 | -3.150166 | -0.826694 |
| F  | -2.570367 | -1.920918 | 0.277170  |
| F  | -2.417301 | -1.742675 | -1.884115 |
| O  | -1.974770 | 0.941292  | -0.564116 |
| S  | -2.087845 | 1.312940  | 0.910309  |
| O  | -2.229674 | 2.728025  | 1.135750  |
| O  | -1.016454 | 0.594325  | 1.624596  |
| O  | -3.502034 | 0.673565  | 1.375502  |

|   |           |           |          |
|---|-----------|-----------|----------|
| H | -3.470333 | -0.266439 | 1.138875 |
|---|-----------|-----------|----------|

**INT4<sub>E</sub>**

|    |           |           |           |
|----|-----------|-----------|-----------|
| Cu | 0.482468  | 0.183517  | -0.517239 |
| N  | 1.455588  | 2.072432  | 0.482767  |
| C  | 1.577219  | 3.298030  | -0.022722 |
| H  | 0.919464  | 3.538979  | -0.853332 |
| C  | 2.487663  | 4.233490  | 0.450475  |
| H  | 2.545407  | 5.216949  | -0.000354 |
| C  | 3.316946  | 3.865309  | 1.500433  |
| H  | 4.048072  | 4.559374  | 1.900639  |
| C  | 3.210500  | 2.586268  | 2.022819  |
| H  | 3.871394  | 2.273997  | 2.821147  |
| C  | 2.266986  | 1.706122  | 1.486604  |
| N  | 1.358133  | -0.515883 | 1.233448  |
| C  | 2.142863  | 0.309825  | 1.956251  |
| C  | 2.830288  | -0.162639 | 3.073848  |
| H  | 3.434923  | 0.510681  | 3.666867  |
| C  | 2.742086  | -1.501111 | 3.421899  |
| H  | 3.279288  | -1.875980 | 4.286314  |
| C  | 1.974495  | -2.348945 | 2.639736  |
| H  | 1.897758  | -3.408671 | 2.848531  |
| C  | 1.299650  | -1.812846 | 1.553655  |
| H  | 0.719555  | -2.441363 | 0.889483  |
| C  | -0.263448 | 0.665370  | -2.306976 |
| F  | 0.155312  | -0.257920 | -3.179979 |
| F  | -1.571134 | 0.855512  | -2.534281 |
| F  | 0.351161  | 1.835395  | -2.613943 |
| C  | -1.390834 | -0.093791 | 0.060025  |
| C  | -2.154105 | 0.971255  | 0.283726  |



|   |           |           |           |
|---|-----------|-----------|-----------|
| C | -1.574224 | -1.514718 | 0.263450  |
| C | -1.891320 | -2.023929 | 1.535547  |
| C | -1.323129 | -2.412654 | -0.786199 |
| C | -1.999862 | -3.390231 | 1.733643  |
| C | -1.434487 | -3.778848 | -0.579744 |
| C | -1.773411 | -4.271230 | 0.677890  |
| H | -2.055076 | -1.334607 | 2.356820  |
| H | -1.010980 | -2.031081 | -1.752124 |
| H | -2.258765 | -3.771352 | 2.715893  |
| H | -1.231905 | -4.460629 | -1.398105 |
| H | -1.848269 | -5.341668 | 0.839199  |
| O | 2.328160  | 0.151416  | -1.357006 |
| S | 2.806565  | -1.282270 | -1.490228 |
| O | 3.233674  | -1.418744 | -3.061093 |
| O | 1.684080  | -2.204545 | -1.362253 |
| O | 4.000354  | -1.521798 | -0.698100 |
| H | 4.087839  | -0.981360 | -3.161778 |
| C | -1.811209 | 2.407855  | 0.066582  |
| H | -2.598410 | 2.914004  | -0.495720 |
| H | -1.686953 | 2.934397  | 1.016972  |
| H | -0.884624 | 2.478306  | -0.497658 |
| S | -3.863305 | 0.785840  | 0.804289  |
| O | -4.118300 | 1.746558  | 1.862248  |
| O | -4.290046 | -0.588042 | 0.960659  |
| O | -4.512943 | 1.360345  | -0.590535 |
| C | -5.930313 | 1.173220  | -0.704663 |
| H | -6.458988 | 1.705708  | 0.090854  |
| H | -6.199243 | 1.595414  | -1.670245 |
| H | -6.182286 | 0.110740  | -0.677151 |

**TS4E**

|    |           |           |           |
|----|-----------|-----------|-----------|
| Cu | 0.593315  | 0.115089  | -0.516052 |
| N  | 1.494126  | 2.101192  | 0.089448  |
| C  | 1.667625  | 3.160412  | -0.700027 |
| H  | 1.052955  | 3.191179  | -1.596181 |
| C  | 2.575848  | 4.173993  | -0.428556 |
| H  | 2.678382  | 5.012250  | -1.107117 |
| C  | 3.345323  | 4.071260  | 0.722144  |
| H  | 4.072685  | 4.835604  | 0.973356  |
| C  | 3.188975  | 2.961748  | 1.537393  |
| H  | 3.810058  | 2.843854  | 2.416394  |
| C  | 2.255422  | 1.982998  | 1.189998  |
| N  | 1.421382  | -0.261427 | 1.371743  |
| C  | 2.108391  | 0.731408  | 1.965569  |
| C  | 2.690992  | 0.550875  | 3.219913  |
| H  | 3.213484  | 1.365062  | 3.706021  |
| C  | 2.594854  | -0.684322 | 3.842613  |
| H  | 3.044574  | -0.839068 | 4.817466  |
| C  | 1.934533  | -1.717489 | 3.193950  |
| H  | 1.864143  | -2.708054 | 3.626264  |
| C  | 1.361260  | -1.460683 | 1.956653  |
| H  | 0.862999  | -2.237544 | 1.387640  |
| C  | -0.683142 | 0.039364  | -2.259868 |
| F  | 0.122850  | -0.826854 | -2.883226 |
| F  | -1.915383 | -0.219858 | -2.719489 |
| F  | -0.372494 | 1.286139  | -2.676848 |
| C  | -1.354557 | -0.093868 | -0.332503 |
| C  | -2.151011 | 0.968431  | -0.104357 |
| C  | -1.496293 | -1.461478 | 0.160229  |
| C  | -1.805190 | -1.641208 | 1.521605  |

|   |           |           |           |
|---|-----------|-----------|-----------|
| C | -1.258395 | -2.592584 | -0.631283 |
| C | -1.936052 | -2.912612 | 2.053339  |
| C | -1.381469 | -3.862828 | -0.088596 |
| C | -1.727723 | -4.029470 | 1.248480  |
| H | -1.931822 | -0.770353 | 2.158533  |
| H | -0.960502 | -2.485595 | -1.665516 |
| H | -2.190352 | -3.031132 | 3.101285  |
| H | -1.191165 | -4.727420 | -0.714481 |
| H | -1.818603 | -5.026602 | 1.666503  |
| O | 2.441098  | -0.029335 | -1.438646 |
| S | 2.877299  | -1.466051 | -1.303754 |
| O | 3.164032  | -1.959438 | -2.842572 |
| O | 1.745582  | -2.301323 | -0.898465 |
| O | 4.128918  | -1.603478 | -0.578927 |
| H | 4.031002  | -1.614742 | -3.087171 |
| C | -1.883566 | 2.394319  | -0.455564 |
| H | -2.436514 | 2.700927  | -1.347369 |
| H | -2.196512 | 3.049594  | 0.361505  |
| H | -0.820516 | 2.542123  | -0.619361 |
| S | -3.747000 | 0.729826  | 0.679618  |
| O | -3.708899 | 1.270738  | 2.026579  |
| O | -4.312164 | -0.581247 | 0.443247  |
| O | -4.548306 | 1.796483  | -0.280355 |
| C | -5.976863 | 1.681445  | -0.217713 |
| H | -6.338828 | 1.875198  | 0.795707  |
| H | -6.356177 | 2.444368  | -0.893856 |
| H | -6.299376 | 0.691728  | -0.547589 |

### INT5<sub>E</sub>

|    |          |           |           |
|----|----------|-----------|-----------|
| Cu | 0.442646 | -0.417364 | -0.269676 |
|----|----------|-----------|-----------|

|   |           |           |           |
|---|-----------|-----------|-----------|
| N | 2.411742  | -0.011910 | -1.025209 |
| C | 2.837583  | -0.337484 | -2.245707 |
| H | 2.141834  | -0.912492 | -2.851032 |
| C | 4.089693  | 0.019419  | -2.724677 |
| H | 4.396741  | -0.269854 | -3.722421 |
| C | 4.926009  | 0.750577  | -1.890153 |
| H | 5.909973  | 1.058736  | -2.226966 |
| C | 4.496209  | 1.070911  | -0.611907 |
| H | 5.144379  | 1.623503  | 0.056608  |
| C | 3.227332  | 0.663367  | -0.196507 |
| N | 1.488656  | 0.375267  | 1.418379  |
| C | 2.708491  | 0.885133  | 1.170531  |
| C | 3.438076  | 1.539744  | 2.160386  |
| H | 4.414987  | 1.954689  | 1.946187  |
| C | 2.896820  | 1.651072  | 3.432456  |
| H | 3.447709  | 2.159518  | 4.216506  |
| C | 1.651540  | 1.095326  | 3.687685  |
| H | 1.199916  | 1.146019  | 4.670773  |
| C | 0.980771  | 0.465943  | 2.648174  |
| H | 0.006817  | 0.013661  | 2.792695  |
| C | -1.597794 | -0.968159 | -2.218927 |
| F | -2.163514 | -2.116297 | -1.856592 |
| F | -2.393216 | -0.402964 | -3.159384 |
| F | -0.436165 | -1.272815 | -2.840257 |
| C | -1.431854 | -0.027154 | -1.039986 |
| C | -0.621291 | 1.105924  | -1.188430 |
| C | -2.554639 | -0.114029 | -0.057925 |
| C | -2.524328 | -0.972731 | 1.038074  |
| C | -3.683463 | 0.675797  | -0.291269 |
| C | -3.600702 | -1.012962 | 1.914358  |

|   |           |           |           |
|---|-----------|-----------|-----------|
| C | -4.761948 | 0.623591  | 0.583360  |
| C | -4.718506 | -0.215017 | 1.692221  |
| H | -1.651454 | -1.589172 | 1.221949  |
| H | -3.708461 | 1.330889  | -1.157619 |
| H | -3.560857 | -1.675185 | 2.772588  |
| H | -5.636863 | 1.238679  | 0.396893  |
| H | -5.558068 | -0.250805 | 2.378849  |
| O | 0.512101  | -2.399472 | -0.312504 |
| S | 0.519030  | -3.232625 | 0.951877  |
| O | -0.937325 | -4.005864 | 0.885116  |
| O | 0.372300  | -2.412070 | 2.144456  |
| O | 1.547414  | -4.250576 | 0.912799  |
| H | -0.911418 | -4.596653 | 0.122846  |
| C | 0.003703  | 1.611430  | -2.457908 |
| H | -0.670083 | 2.345323  | -2.914491 |
| H | 0.950023  | 2.113468  | -2.257599 |
| H | 0.168813  | 0.815255  | -3.178193 |
| S | -0.684799 | 2.411832  | 0.053101  |
| O | 0.570559  | 3.130619  | -0.030006 |
| O | -1.175699 | 1.958541  | 1.336974  |
| O | -1.846237 | 3.330097  | -0.652748 |
| C | -2.760601 | 3.992038  | 0.236806  |
| H | -2.245100 | 4.750268  | 0.830949  |
| H | -3.491020 | 4.469005  | -0.413910 |
| H | -3.250532 | 3.269971  | 0.893613  |

#### INT4z

|    |           |           |           |
|----|-----------|-----------|-----------|
| Cu | -0.092783 | -0.116532 | -0.535821 |
| N  | 2.171186  | -0.510493 | -0.322480 |
| C  | 3.127266  | -0.366819 | -1.237103 |

|   |           |           |           |
|---|-----------|-----------|-----------|
| H | 2.837475  | 0.149101  | -2.144204 |
| C | 4.425006  | -0.830032 | -1.051921 |
| H | 5.167446  | -0.692556 | -1.829115 |
| C | 4.734647  | -1.467143 | 0.141382  |
| H | 5.734629  | -1.844264 | 0.327417  |
| C | 3.740747  | -1.625539 | 1.094728  |
| H | 3.961804  | -2.134517 | 2.024500  |
| C | 2.459094  | -1.138658 | 0.825722  |
| N | 0.123943  | -0.865467 | 1.367740  |
| C | 1.335634  | -1.304634 | 1.769497  |
| C | 1.485744  | -1.924633 | 3.009838  |
| H | 2.459286  | -2.271551 | 3.330032  |
| C | 0.381643  | -2.119016 | 3.823392  |
| H | 0.492159  | -2.609577 | 4.784384  |
| C | -0.861827 | -1.697526 | 3.379682  |
| H | -1.760354 | -1.851844 | 3.963758  |
| C | -0.943651 | -1.077926 | 2.142636  |
| H | -1.896563 | -0.765646 | 1.734144  |
| C | -0.428568 | 0.454514  | -2.417774 |
| F | -1.392110 | -0.345583 | -2.903806 |
| F | -0.761055 | 1.707953  | -2.730941 |
| F | 0.706155  | 0.158003  | -3.062766 |
| C | -1.059105 | 1.523355  | 0.007808  |
| C | -0.464331 | 2.707909  | 0.185631  |
| C | -2.446234 | 1.250380  | 0.367903  |
| C | -2.911656 | 1.634588  | 1.641184  |
| C | -3.326602 | 0.580815  | -0.492752 |
| C | -4.219701 | 1.382069  | 2.023260  |
| C | -4.637477 | 0.341596  | -0.108712 |
| C | -5.089232 | 0.738256  | 1.145598  |

|   |           |           |           |
|---|-----------|-----------|-----------|
| H | -2.223060 | 2.115236  | 2.329791  |
| H | -2.973695 | 0.226176  | -1.450835 |
| H | -4.561105 | 1.682543  | 3.008575  |
| H | -5.303285 | -0.180227 | -0.787129 |
| H | -6.111643 | 0.533901  | 1.446036  |
| O | 0.159491  | -2.037569 | -1.260214 |
| S | -0.983675 | -2.908276 | -0.820691 |
| O | -1.388229 | -3.602727 | -2.248977 |
| O | -2.119150 | -2.084579 | -0.391993 |
| O | -0.596480 | -3.986933 | 0.074610  |
| H | -1.850311 | -4.421414 | -2.032971 |
| C | -1.111424 | 3.996602  | 0.601160  |
| H | -0.835370 | 4.276505  | 1.622783  |
| H | -0.784991 | 4.813621  | -0.045638 |
| H | -2.195808 | 3.908754  | 0.544997  |
| S | 1.282472  | 2.874622  | -0.093002 |
| O | 1.679578  | 4.255586  | 0.096855  |
| O | 1.715414  | 2.168357  | -1.283322 |
| O | 1.777077  | 2.020866  | 1.230790  |
| C | 3.188901  | 2.079475  | 1.468349  |
| H | 3.509415  | 3.108564  | 1.650007  |
| H | 3.360300  | 1.475588  | 2.358222  |
| H | 3.745942  | 1.658064  | 0.624879  |

**TS4<sub>z</sub>**

|    |          |           |          |
|----|----------|-----------|----------|
| Cu | 0.004920 | 0.099683  | 0.413285 |
| N  | 2.169992 | 0.426841  | 0.698685 |
| C  | 2.945285 | -0.038014 | 1.678663 |
| H  | 2.456074 | -0.668741 | 2.409604 |
| C  | 4.302872 | 0.242678  | 1.767307 |

|   |           |           |           |
|---|-----------|-----------|-----------|
| H | 4.887022  | -0.155524 | 2.588310  |
| C | 4.878739  | 1.031696  | 0.781452  |
| H | 5.938297  | 1.263699  | 0.802823  |
| C | 4.075933  | 1.527987  | -0.233492 |
| H | 4.508089  | 2.147943  | -1.008905 |
| C | 2.712539  | 1.221676  | -0.238088 |
| N | 0.507816  | 1.331821  | -1.206811 |
| C | 1.781526  | 1.773959  | -1.245619 |
| C | 2.173252  | 2.757606  | -2.153820 |
| H | 3.192116  | 3.122446  | -2.160568 |
| C | 1.240008  | 3.301380  | -3.022093 |
| H | 1.532583  | 4.075826  | -3.722846 |
| C | -0.072405 | 2.862953  | -2.952894 |
| H | -0.846601 | 3.282962  | -3.582908 |
| C | -0.394267 | 1.884617  | -2.023553 |
| H | -1.417285 | 1.557387  | -1.881369 |
| C | -0.863366 | -1.207498 | 1.904962  |
| F | -1.848200 | -0.414284 | 2.307461  |
| F | -1.228689 | -2.473580 | 2.152151  |
| F | 0.200194  | -0.968040 | 2.689285  |
| C | -1.093068 | -1.468661 | -0.115752 |
| C | -0.461656 | -2.497092 | -0.722023 |
| C | -2.457942 | -1.095223 | -0.523514 |
| C | -2.620886 | -0.635339 | -1.839075 |
| C | -3.594306 | -1.237590 | 0.279765  |
| C | -3.870806 | -0.280252 | -2.321281 |
| C | -4.844132 | -0.887174 | -0.209570 |
| C | -4.988083 | -0.393126 | -1.501187 |
| H | -1.747620 | -0.570287 | -2.481399 |
| H | -3.508902 | -1.630650 | 1.283459  |



|   |           |           |           |
|---|-----------|-----------|-----------|
| H | -3.972962 | 0.082180  | -3.339035 |
| H | -5.714389 | -1.000963 | 0.427882  |
| H | -5.967437 | -0.108084 | -1.870384 |
| O | -0.137102 | 1.834021  | 1.672433  |
| S | -1.299537 | 2.614151  | 1.164354  |
| O | -2.115664 | 2.895592  | 2.564951  |
| O | -2.171634 | 1.768270  | 0.328819  |
| O | -0.973424 | 3.916078  | 0.598803  |
| H | -2.768643 | 3.577068  | 2.366989  |
| C | -1.030753 | -3.380672 | -1.787184 |
| H | -0.615314 | -3.135123 | -2.770451 |
| H | -0.772470 | -4.423181 | -1.589477 |
| H | -2.113409 | -3.275119 | -1.836468 |
| S | 1.234100  | -2.874077 | -0.357728 |
| O | 1.555346  | -4.207151 | -0.824012 |
| O | 1.589253  | -2.481803 | 0.990889  |
| O | 1.892932  | -1.793842 | -1.412205 |
| C | 3.321222  | -1.869784 | -1.520481 |
| H | 3.631471  | -2.856095 | -1.874956 |
| H | 3.598038  | -1.109710 | -2.248993 |
| H | 3.795345  | -1.649592 | -0.558339 |

### **INT5z**

|    |          |           |           |
|----|----------|-----------|-----------|
| Cu | 0.003177 | -0.080173 | -0.221748 |
| N  | 1.958442 | 0.606125  | -0.618651 |
| C  | 2.279209 | 1.276883  | -1.725716 |
| H  | 1.445585 | 1.634899  | -2.320746 |
| C  | 3.594858 | 1.519789  | -2.096490 |
| H  | 3.810376 | 2.063090  | -3.008479 |
| C  | 4.609454 | 1.043690  | -1.277312 |

|   |           |           |           |
|---|-----------|-----------|-----------|
| H | 5.650518  | 1.206885  | -1.534665 |
| C | 4.277663  | 0.333752  | -0.133294 |
| H | 5.056149  | -0.079988 | 0.495496  |
| C | 2.933834  | 0.117197  | 0.165464  |
| N | 1.188613  | -1.041657 | 1.318096  |
| C | 2.491279  | -0.708702 | 1.309003  |
| C | 3.361484  | -1.170103 | 2.295862  |
| H | 4.404239  | -0.877476 | 2.292354  |
| C | 2.878677  | -2.018228 | 3.281028  |
| H | 3.543097  | -2.390870 | 4.053236  |
| C | 1.542755  | -2.394749 | 3.254986  |
| H | 1.131897  | -3.078048 | 3.988054  |
| C | 0.735340  | -1.876609 | 2.252480  |
| H | -0.313302 | -2.152932 | 2.176217  |
| C | -2.179075 | 1.188724  | -1.582529 |
| F | -3.032567 | 0.405168  | -2.246700 |
| F | -2.740484 | 2.415137  | -1.506458 |
| F | -1.077220 | 1.296651  | -2.342085 |
| C | -1.916359 | 0.627143  | -0.190263 |
| C | -1.131914 | 1.264902  | 0.787173  |
| C | -2.931153 | -0.375399 | 0.269790  |
| C | -2.681952 | -1.747013 | 0.245657  |
| C | -4.154210 | 0.098935  | 0.752059  |
| C | -3.646507 | -2.633313 | 0.714953  |
| C | -5.116188 | -0.792385 | 1.209836  |
| C | -4.861876 | -2.160662 | 1.196589  |
| H | -1.742349 | -2.126412 | -0.144786 |
| H | -4.346032 | 1.168875  | 0.767287  |
| H | -3.439991 | -3.698346 | 0.693156  |
| H | -6.063857 | -0.416332 | 1.581132  |

|   |           |           |           |
|---|-----------|-----------|-----------|
| H | -5.612737 | -2.855570 | 1.558145  |
| O | -0.029141 | -1.443167 | -1.697410 |
| S | 0.788943  | -2.675410 | -1.426771 |
| O | 0.586408  | -3.420519 | -2.873240 |
| O | 0.192841  | -3.536419 | -0.406843 |
| O | 2.213757  | -2.401569 | -1.271499 |
| H | 1.029921  | -4.274369 | -2.802731 |
| C | -1.282702 | 0.944748  | 2.251870  |
| H | -0.338318 | 1.064770  | 2.781422  |
| H | -2.014689 | 1.620930  | 2.705694  |
| H | -1.639884 | -0.075421 | 2.386994  |
| S | -0.418394 | 2.904161  | 0.567634  |
| O | -1.274313 | 3.848906  | 1.253274  |
| O | 0.033861  | 3.163941  | -0.780746 |
| O | 0.908931  | 2.637510  | 1.502276  |
| C | 2.032762  | 3.478907  | 1.215528  |
| H | 1.798852  | 4.528195  | 1.414358  |
| H | 2.817895  | 3.145295  | 1.891730  |
| H | 2.353720  | 3.359459  | 0.177553  |

**INTB<sub>E</sub>**

|    |          |          |           |
|----|----------|----------|-----------|
| Cu | 0.227261 | 0.215916 | -0.517686 |
| N  | 1.573499 | 1.828618 | 0.597918  |
| C  | 2.032057 | 2.979027 | 0.109520  |
| H  | 1.433191 | 3.438922 | -0.672103 |
| C  | 3.209543 | 3.578158 | 0.537887  |
| H  | 3.537361 | 4.513380 | 0.100120  |
| C  | 3.950572 | 2.935735 | 1.519177  |
| H  | 4.885453 | 3.356000 | 1.873838  |
| C  | 3.488490 | 1.732259 | 2.028077  |

|   |           |           |           |
|---|-----------|-----------|-----------|
| H | 4.072304  | 1.196946  | 2.766084  |
| C | 2.290170  | 1.203469  | 1.544164  |
| N | 0.823755  | -0.692765 | 1.257140  |
| C | 1.777144  | -0.102629 | 2.006890  |
| C | 2.275990  | -0.730554 | 3.147865  |
| H | 3.012435  | -0.230953 | 3.763757  |
| C | 1.825888  | -1.995627 | 3.489180  |
| H | 2.212604  | -2.492623 | 4.372256  |
| C | 0.891770  | -2.616904 | 2.675364  |
| H | 0.533204  | -3.618591 | 2.876943  |
| C | 0.418691  | -1.928385 | 1.569095  |
| H | -0.280817 | -2.388213 | 0.882413  |
| C | -0.265739 | 0.883838  | -2.328193 |
| F | 0.019662  | -0.095265 | -3.194852 |
| F | -1.478548 | 1.352247  | -2.653162 |
| F | 0.605591  | 1.897835  | -2.542683 |
| C | -1.684035 | 0.374936  | -0.075942 |
| C | -2.227512 | 1.569433  | 0.159832  |
| C | -2.208684 | -0.970961 | 0.069098  |
| C | -2.781415 | -1.388934 | 1.284043  |
| C | -2.060849 | -1.905578 | -0.967030 |
| C | -3.227211 | -2.692451 | 1.436350  |
| C | -2.507147 | -3.208875 | -0.805919 |
| C | -3.090907 | -3.606841 | 0.393599  |
| H | -2.873739 | -0.677919 | 2.098385  |
| H | -1.562064 | -1.611275 | -1.884037 |
| H | -3.676175 | -2.999977 | 2.375274  |
| H | -2.377979 | -3.920748 | -1.613700 |
| H | -3.429025 | -4.630038 | 0.520662  |
| O | 2.085596  | -0.193316 | -1.229886 |

|   |           |           |           |
|---|-----------|-----------|-----------|
| S | 2.264188  | -1.684242 | -1.356045 |
| O | 2.838277  | -1.771154 | -2.885910 |
| O | 0.961989  | -2.357254 | -1.326570 |
| O | 3.293296  | -2.227049 | -0.484787 |
| H | 3.269412  | -2.630157 | -2.969871 |
| C | -1.533963 | 2.881815  | -0.005242 |
| H | -2.079696 | 3.524619  | -0.699716 |
| H | -1.462884 | 3.418304  | 0.947497  |
| H | -0.528649 | 2.729834  | -0.385475 |
| C | -3.655758 | 1.696458  | 0.630087  |
| F | -3.717790 | 1.730510  | 1.987862  |
| F | -4.466668 | 0.711287  | 0.228008  |
| F | -4.208815 | 2.850460  | 0.206125  |

**TSB<sub>E</sub>**

|    |           |           |           |
|----|-----------|-----------|-----------|
| Cu | -0.279245 | -0.160715 | -0.456070 |
| N  | -1.713345 | -1.824397 | 0.161416  |
| C  | -2.105573 | -2.849307 | -0.594002 |
| H  | -1.431604 | -3.134384 | -1.397518 |
| C  | -3.301834 | -3.526931 | -0.403615 |
| H  | -3.572347 | -4.350872 | -1.052871 |
| C  | -4.134065 | -3.106852 | 0.624133  |
| H  | -5.083786 | -3.598130 | 0.805886  |
| C  | -3.744638 | -2.029932 | 1.404386  |
| H  | -4.399674 | -1.662837 | 2.184227  |
| C  | -2.525190 | -1.401160 | 1.144782  |
| N  | -1.074237 | 0.505296  | 1.362304  |
| C  | -2.096827 | -0.195397 | 1.887701  |
| C  | -2.743829 | 0.238529  | 3.044812  |
| H  | -3.544188 | -0.346997 | 3.478801  |

|   |           |           |           |
|---|-----------|-----------|-----------|
| C | -2.356894 | 1.431018  | 3.636015  |
| H | -2.856203 | 1.781915  | 4.532714  |
| C | -1.339741 | 2.172557  | 3.053586  |
| H | -1.027088 | 3.126672  | 3.459562  |
| C | -0.726124 | 1.670418  | 1.915323  |
| H | 0.049418  | 2.224339  | 1.399383  |
| C | 0.950814  | -0.545435 | -2.170921 |
| F | 0.421091  | 0.469629  | -2.862702 |
| F | 2.204415  | -0.680601 | -2.633174 |
| F | 0.299254  | -1.678277 | -2.516542 |
| C | 1.658179  | -0.418182 | -0.246512 |
| C | 2.159484  | -1.620368 | 0.101182  |
| C | 2.153932  | 0.914069  | 0.106148  |
| C | 2.467044  | 1.164380  | 1.454830  |
| C | 2.271231  | 1.964274  | -0.813363 |
| C | 2.932173  | 2.406133  | 1.855970  |
| C | 2.728680  | 3.207709  | -0.402808 |
| C | 3.066563  | 3.434200  | 0.926976  |
| H | 2.335228  | 0.371699  | 2.183869  |
| H | 1.994720  | 1.819670  | -1.848648 |
| H | 3.178750  | 2.574635  | 2.899198  |
| H | 2.809835  | 4.008900  | -1.128965 |
| H | 3.419607  | 4.410826  | 1.241065  |
| O | -2.039443 | 0.412630  | -1.425846 |
| S | -2.080297 | 1.907069  | -1.356801 |
| O | -2.316563 | 2.273113  | -2.941160 |
| O | -0.758968 | 2.437348  | -0.982852 |
| O | -3.213287 | 2.452862  | -0.626630 |
| H | -2.621089 | 3.187917  | -2.967351 |
| C | 1.510960  | -2.938141 | -0.175066 |

|   |          |           |           |
|---|----------|-----------|-----------|
| H | 2.005637 | -3.466131 | -0.996530 |
| H | 1.582797 | -3.583904 | 0.705195  |
| H | 0.461106 | -2.812236 | -0.414108 |
| C | 3.485481 | -1.766210 | 0.801098  |
| F | 3.332341 | -1.886179 | 2.145979  |
| F | 4.350325 | -0.769968 | 0.588695  |
| F | 4.099456 | -2.900114 | 0.399177  |

### INTC<sub>E</sub>

|    |           |           |           |
|----|-----------|-----------|-----------|
| Cu | -0.143975 | -0.445242 | -0.256790 |
| N  | -2.024557 | -1.280121 | -0.017798 |
| C  | -2.426946 | -2.334209 | -0.730187 |
| H  | -1.660727 | -2.826131 | -1.323841 |
| C  | -3.738700 | -2.781310 | -0.738486 |
| H  | -4.019845 | -3.637605 | -1.339100 |
| C  | -4.667865 | -2.094081 | 0.031715  |
| H  | -5.706498 | -2.405849 | 0.052938  |
| C  | -4.257579 | -0.989973 | 0.760720  |
| H  | -4.976768 | -0.427276 | 1.341668  |
| C  | -2.922282 | -0.591306 | 0.710493  |
| N  | -1.138432 | 0.944519  | 1.134783  |
| C  | -2.418984 | 0.622784  | 1.387587  |
| C  | -3.222656 | 1.421258  | 2.199085  |
| H  | -4.248505 | 1.145238  | 2.407624  |
| C  | -2.697530 | 2.591187  | 2.726277  |
| H  | -3.311489 | 3.231274  | 3.350727  |
| C  | -1.385826 | 2.934695  | 2.433533  |
| H  | -0.942533 | 3.849562  | 2.807122  |
| C  | -0.643275 | 2.075209  | 1.636051  |
| H  | 0.387664  | 2.299005  | 1.377371  |

|   |           |           |           |
|---|-----------|-----------|-----------|
| C | 2.128492  | -1.406591 | -1.702890 |
| F | 2.528675  | -0.478126 | -2.564197 |
| F | 3.108717  | -2.341348 | -1.632636 |
| F | 1.054676  | -2.021613 | -2.250760 |
| C | 1.858266  | -0.831847 | -0.322497 |
| C | 1.253677  | -1.658268 | 0.638050  |
| C | 2.690385  | 0.368196  | -0.007082 |
| C | 2.323186  | 1.640466  | -0.450086 |
| C | 3.883942  | 0.200042  | 0.699122  |
| C | 3.127507  | 2.734627  | -0.156151 |
| C | 4.690126  | 1.296363  | 0.978952  |
| C | 4.310200  | 2.566344  | 0.557668  |
| H | 1.402480  | 1.773997  | -1.010688 |
| H | 4.174294  | -0.792362 | 1.031491  |
| H | 2.823950  | 3.720457  | -0.493312 |
| H | 5.614750  | 1.157258  | 1.529375  |
| H | 4.937828  | 3.422705  | 0.782091  |
| O | -0.433877 | 0.519682  | -2.001769 |
| S | -1.365892 | 1.697466  | -1.989291 |
| O | -1.478643 | 1.935218  | -3.609882 |
| O | -0.761164 | 2.900035  | -1.422419 |
| O | -2.701565 | 1.366456  | -1.502354 |
| H | -1.945349 | 2.771250  | -3.727330 |
| C | 0.947730  | -3.123281 | 0.456218  |
| H | 1.737569  | -3.714847 | 0.932265  |
| H | 0.007510  | -3.388035 | 0.942347  |
| H | 0.896583  | -3.421208 | -0.585426 |
| C | 1.289407  | -1.301084 | 2.106668  |
| F | 1.405663  | 0.001986  | 2.380506  |
| F | 2.321932  | -1.927452 | 2.719442  |



|   |          |           |          |
|---|----------|-----------|----------|
| F | 0.166327 | -1.729237 | 2.723666 |
|---|----------|-----------|----------|

**INTB<sub>z</sub>**

|    |           |           |           |
|----|-----------|-----------|-----------|
| Cu | 0.031768  | 0.034177  | -0.501967 |
| N  | 2.299242  | 0.054669  | -0.034087 |
| C  | 3.301302  | 0.510909  | -0.780527 |
| H  | 3.016745  | 1.036112  | -1.685050 |
| C  | 4.637881  | 0.341414  | -0.441856 |
| H  | 5.417160  | 0.729705  | -1.086805 |
| C  | 4.938119  | -0.329537 | 0.734755  |
| H  | 5.967376  | -0.476422 | 1.043975  |
| C  | 3.899830  | -0.821727 | 1.509667  |
| H  | 4.118058  | -1.358561 | 2.424048  |
| C  | 2.583461  | -0.622378 | 1.087496  |
| N  | 0.200120  | -0.930237 | 1.312608  |
| C  | 1.426044  | -1.174092 | 1.821888  |
| C  | 1.571106  | -1.958329 | 2.966433  |
| H  | 2.555255  | -2.153696 | 3.370946  |
| C  | 0.453850  | -2.510194 | 3.571384  |
| H  | 0.563126  | -3.129769 | 4.454903  |
| C  | -0.795351 | -2.276847 | 3.017810  |
| H  | -1.696087 | -2.709211 | 3.435004  |
| C  | -0.874835 | -1.483241 | 1.884437  |
| H  | -1.820336 | -1.307411 | 1.386992  |
| C  | -0.273575 | 0.817169  | -2.308705 |
| F  | -1.034654 | -0.050655 | -2.993410 |
| F  | -0.804555 | 2.032054  | -2.495103 |
| F  | 0.945995  | 0.826007  | -2.877800 |
| C  | -1.084905 | 1.498711  | 0.199620  |
| C  | -0.621968 | 2.712353  | 0.515190  |

|             |           |           |           |
|-------------|-----------|-----------|-----------|
| C           | -2.422021 | 0.988947  | 0.477057  |
| C           | -2.949796 | 1.097496  | 1.778286  |
| C           | -3.181049 | 0.328440  | -0.499207 |
| C           | -4.207532 | 0.595994  | 2.076920  |
| C           | -4.440131 | -0.167949 | -0.195503 |
| C           | -4.958827 | -0.036240 | 1.088796  |
| H           | -2.348518 | 1.564360  | 2.552870  |
| H           | -2.768326 | 0.179321  | -1.488659 |
| H           | -4.599210 | 0.689155  | 3.084815  |
| H           | -5.008914 | -0.681355 | -0.962848 |
| H           | -5.938627 | -0.438335 | 1.324641  |
| O           | 0.675286  | -1.673268 | -1.416728 |
| S           | -0.342253 | -2.771568 | -1.268389 |
| O           | -0.455678 | -3.275918 | -2.822719 |
| O           | -1.643176 | -2.213110 | -0.886475 |
| O           | 0.125451  | -3.909124 | -0.493142 |
| H           | -0.771457 | -4.186762 | -2.790817 |
| C           | -1.464959 | 3.819961  | 1.084935  |
| H           | -1.148042 | 4.084108  | 2.099961  |
| H           | -1.361122 | 4.723446  | 0.479233  |
| H           | -2.516099 | 3.541599  | 1.114560  |
| C           | 0.822964  | 3.069495  | 0.336401  |
| F           | 1.347395  | 2.632982  | -0.824551 |
| F           | 1.592448  | 2.553230  | 1.328788  |
| F           | 1.022880  | 4.400368  | 0.367045  |
| <b>TSBz</b> |           |           |           |
| Cu          | 0.045315  | -0.075701 | -0.452508 |
| N           | 2.245998  | -0.410134 | -0.616918 |
| C           | 3.089918  | 0.118663  | -1.501867 |

|   |           |           |           |
|---|-----------|-----------|-----------|
| H | 2.635676  | 0.668384  | -2.318459 |
| C | 4.469183  | -0.000899 | -1.400012 |
| H | 5.111763  | 0.447073  | -2.148464 |
| C | 4.990885  | -0.691201 | -0.314866 |
| H | 6.063067  | -0.785839 | -0.180332 |
| C | 4.119492  | -1.270234 | 0.594099  |
| H | 4.507629  | -1.818751 | 1.443270  |
| C | 2.743826  | -1.130205 | 0.401899  |
| N | 0.455763  | -1.471425 | 1.069216  |
| C | 1.748607  | -1.799116 | 1.266877  |
| C | 2.109696  | -2.782932 | 2.187914  |
| H | 3.150219  | -3.047177 | 2.326879  |
| C | 1.123523  | -3.453234 | 2.894515  |
| H | 1.392114  | -4.227464 | 3.605253  |
| C | -0.205317 | -3.140703 | 2.651230  |
| H | -1.012703 | -3.663700 | 3.148902  |
| C | -0.494187 | -2.146059 | 1.727686  |
| H | -1.514301 | -1.885486 | 1.465178  |
| C | -0.642812 | 1.532179  | -1.702630 |
| F | -1.727003 | 0.937538  | -2.186913 |
| F | -0.863268 | 2.857625  | -1.748852 |
| F | 0.374753  | 1.305467  | -2.560106 |
| C | -0.706744 | 1.552556  | 0.383501  |
| C | 0.094189  | 2.435549  | 1.010119  |
| C | -2.063848 | 1.230167  | 0.850924  |
| C | -2.189081 | 0.562390  | 2.077867  |
| C | -3.227950 | 1.596397  | 0.166645  |
| C | -3.436961 | 0.242695  | 2.591101  |
| C | -4.474167 | 1.275673  | 0.684510  |
| C | -4.585893 | 0.588717  | 1.888367  |

|   |           |           |           |
|---|-----------|-----------|-----------|
| H | -1.288229 | 0.304522  | 2.627157  |
| H | -3.161876 | 2.137586  | -0.767888 |
| H | -3.511759 | -0.278404 | 3.540313  |
| H | -5.366721 | 1.563440  | 0.139354  |
| H | -5.563883 | 0.330084  | 2.280021  |
| O | -0.228242 | -1.551275 | -1.918942 |
| S | -1.501171 | -2.253988 | -1.583289 |
| O | -2.307316 | -2.134681 | -3.011206 |
| O | -2.267524 | -1.475610 | -0.592707 |
| O | -1.374514 | -3.675086 | -1.299546 |
| H | -2.992499 | -2.812819 | -2.991181 |
| C | -0.301996 | 3.195567  | 2.241078  |
| H | 0.342931  | 2.932699  | 3.086743  |
| H | -0.180075 | 4.269609  | 2.077490  |
| H | -1.333414 | 2.997077  | 2.521697  |
| C | 1.506258  | 2.701047  | 0.591487  |
| F | 1.742562  | 2.470633  | -0.707904 |
| F | 2.378039  | 1.928971  | 1.293291  |
| F | 1.865517  | 3.976469  | 0.829359  |

**INTC<sub>z</sub>**

|    |           |           |           |
|----|-----------|-----------|-----------|
| Cu | -1.140966 | 0.044955  | -0.914309 |
| N  | -0.146622 | -1.739100 | -1.182970 |
| C  | 1.148931  | -1.851690 | -1.508107 |
| H  | 1.603435  | -0.976569 | -1.956285 |
| C  | 1.889461  | -3.003958 | -1.284776 |
| H  | 2.939870  | -3.027652 | -1.549900 |
| C  | 1.251937  | -4.101931 | -0.720267 |
| H  | 1.795378  | -5.019898 | -0.524576 |
| C  | -0.095920 | -4.004534 | -0.403467 |

|   |           |           |           |
|---|-----------|-----------|-----------|
| H | -0.612189 | -4.842109 | 0.050650  |
| C | -0.772792 | -2.809174 | -0.641490 |
| N | -2.586063 | -1.316819 | -0.232232 |
| C | -2.186790 | -2.602414 | -0.267418 |
| C | -3.053281 | -3.645031 | 0.058152  |
| H | -2.726662 | -4.676569 | -0.004606 |
| C | -4.350823 | -3.342794 | 0.447640  |
| H | -5.042096 | -4.138295 | 0.704584  |
| C | -4.748874 | -2.012743 | 0.499191  |
| H | -5.750396 | -1.736316 | 0.807062  |
| C | -3.836142 | -1.027200 | 0.143162  |
| H | -4.075021 | 0.033500  | 0.168887  |
| C | 2.162052  | 1.770748  | -0.447229 |
| F | 1.456877  | 2.885941  | -0.228783 |
| F | 3.427591  | 2.169111  | -0.663523 |
| F | 1.704074  | 1.244462  | -1.602977 |
| C | 2.063753  | 0.787750  | 0.709111  |
| C | 3.068003  | -0.075230 | 0.989526  |
| C | 0.800171  | 0.764062  | 1.485281  |
| C | 0.209277  | -0.486539 | 1.741749  |
| C | 0.146111  | 1.907839  | 1.962975  |
| C | -0.986439 | -0.589530 | 2.437221  |
| C | -1.058781 | 1.800974  | 2.643696  |
| C | -1.631514 | 0.558697  | 2.881526  |
| H | 0.696238  | -1.384286 | 1.374061  |
| H | 0.563900  | 2.888862  | 1.794083  |
| H | -1.428022 | -1.567801 | 2.605268  |
| H | -1.567430 | 2.704915  | 2.957290  |
| H | -2.586943 | 0.488576  | 3.390527  |
| O | -1.191292 | 1.940466  | -1.231384 |

|   |           |           |           |
|---|-----------|-----------|-----------|
| S | -2.353691 | 2.757384  | -0.709365 |
| O | -1.614807 | 3.874217  | 0.256707  |
| O | -3.170876 | 2.005156  | 0.233964  |
| O | -3.010044 | 3.501371  | -1.765186 |
| H | -1.184926 | 4.502428  | -0.336411 |
| C | 3.151483  | -0.871350 | 2.256577  |
| H | 2.950400  | -1.935083 | 2.099275  |
| H | 4.170220  | -0.809360 | 2.651693  |
| H | 2.461682  | -0.496899 | 3.009769  |
| C | 4.254679  | -0.329704 | 0.088462  |
| F | 3.973172  | -0.245699 | -1.223840 |
| F | 4.699883  | -1.598000 | 0.278968  |
| F | 5.295906  | 0.474738  | 0.345481  |

**Product<sub>E</sub>**

|   |           |           |           |
|---|-----------|-----------|-----------|
| C | 2.191406  | -1.144598 | 0.235939  |
| F | 3.160198  | -0.223237 | 0.206376  |
| F | 2.262122  | -1.753425 | 1.438189  |
| F | 2.503134  | -2.070646 | -0.691845 |
| C | 0.820173  | -0.538806 | 0.002657  |
| C | -0.231993 | -1.367532 | -0.089135 |
| C | 0.759618  | 0.939643  | -0.035904 |
| C | 1.315870  | 1.655611  | -1.097356 |
| C | 0.146066  | 1.629072  | 1.010790  |
| C | 1.223071  | 3.038696  | -1.128486 |
| C | 0.066679  | 3.016087  | 0.982649  |
| C | 0.596202  | 3.722188  | -0.090551 |
| H | 1.796645  | 1.121779  | -1.910896 |
| H | -0.271940 | 1.068291  | 1.840789  |
| H | 1.638915  | 3.586614  | -1.967522 |

|   |           |           |           |
|---|-----------|-----------|-----------|
| H | -0.410742 | 3.544947  | 1.801437  |
| H | 0.526194  | 4.804544  | -0.118191 |
| C | -0.249801 | -2.846845 | 0.086666  |
| H | -0.960564 | -3.114857 | 0.874383  |
| H | -0.597736 | -3.341361 | -0.822487 |
| H | 0.727659  | -3.237274 | 0.356249  |
| S | -1.860071 | -0.710298 | -0.511614 |
| O | -2.648694 | -1.826046 | -0.982471 |
| O | -1.784761 | 0.510597  | -1.282409 |
| O | -2.348331 | -0.342333 | 1.010190  |
| C | -3.216074 | 0.796542  | 1.130849  |
| H | -4.173089 | 0.613010  | 0.636493  |
| H | -3.373488 | 0.919944  | 2.200638  |
| H | -2.742838 | 1.686829  | 0.709254  |

**Productz**

|   |           |           |           |
|---|-----------|-----------|-----------|
| C | 0.015508  | 1.571367  | -0.311600 |
| F | 0.924811  | 2.435879  | 0.181720  |
| F | -0.032668 | 1.775313  | -1.634530 |
| F | -1.162117 | 1.934327  | 0.216270  |
| C | 0.414082  | 0.148036  | 0.013723  |
| C | -0.433440 | -0.887195 | 0.147423  |
| C | 1.881245  | -0.082532 | 0.089994  |
| C | 2.661006  | 0.405879  | 1.141098  |
| C | 2.492821  | -0.824677 | -0.924303 |
| C | 4.024148  | 0.143639  | 1.179527  |
| C | 3.858882  | -1.073544 | -0.889812 |
| C | 4.626685  | -0.592975 | 0.164472  |
| H | 2.195478  | 0.984047  | 1.931850  |
| H | 1.886882  | -1.198519 | -1.744823 |

|   |           |           |           |
|---|-----------|-----------|-----------|
| H | 4.619003  | 0.518807  | 2.005843  |
| H | 4.322558  | -1.644177 | -1.687624 |
| H | 5.693037  | -0.790781 | 0.195940  |
| C | -0.025994 | -2.260519 | 0.569371  |
| H | -0.686567 | -2.618295 | 1.363751  |
| H | -0.122954 | -2.976866 | -0.250315 |
| H | 1.001299  | -2.270051 | 0.930114  |
| S | -2.193243 | -0.812127 | -0.258237 |
| O | -2.635084 | -2.182588 | -0.385338 |
| O | -2.459291 | 0.138869  | -1.313374 |
| O | -2.749666 | -0.229539 | 1.158857  |
| C | -3.877425 | 0.658086  | 1.082714  |
| H | -4.768452 | 0.125166  | 0.742280  |
| H | -4.025829 | 1.012330  | 2.100470  |
| H | -3.665592 | 1.495385  | 0.416366  |

**SP<sub>E</sub>**

|   |           |           |           |
|---|-----------|-----------|-----------|
| C | 1.037142  | 0.005662  | -0.000199 |
| C | 1.696227  | -0.239874 | -1.204619 |
| C | 1.696310  | -0.238911 | 1.204397  |
| C | 2.987342  | -0.750703 | -1.203084 |
| C | 2.987438  | -0.749772 | 1.203174  |
| C | 3.634767  | -1.008853 | 0.000115  |
| H | 1.187251  | -0.038742 | -2.142318 |
| H | 1.187415  | -0.036949 | 2.141976  |
| H | 3.488654  | -0.947841 | -2.145048 |
| H | 3.488806  | -0.946167 | 2.145284  |
| H | 4.643545  | -1.408519 | 0.000242  |
| C | -0.342549 | 0.569514  | -0.000277 |
| C | -1.487147 | -0.131004 | -0.000043 |



|   |           |           |           |
|---|-----------|-----------|-----------|
| C | -1.503821 | -1.639902 | 0.000188  |
| F | -0.320835 | -2.250784 | 0.000275  |
| F | -2.177849 | -2.085340 | 1.084214  |
| F | -2.177793 | -2.085533 | -1.083984 |
| C | -0.307383 | 2.077381  | -0.000178 |
| F | -1.504284 | 2.681427  | -0.001272 |
| F | 0.353077  | 2.530047  | 1.083703  |
| F | 0.355236  | 2.530329  | -1.082519 |
| C | -2.891755 | 0.413342  | -0.000076 |
| H | -3.085462 | 1.029674  | 0.878108  |
| H | -3.085706 | 1.028979  | -0.878677 |
| H | -3.611883 | -0.403034 | 0.000308  |

**SP<sub>z</sub>**

|   |           |           |           |
|---|-----------|-----------|-----------|
| C | -1.451244 | -0.160848 | -0.008836 |
| C | -2.048414 | -0.984515 | 0.948461  |
| C | -2.255825 | 0.445633  | -0.977337 |
| C | -3.418472 | -1.212614 | 0.927994  |
| C | -3.623860 | 0.209477  | -1.001351 |
| C | -4.208766 | -0.620581 | -0.050439 |
| H | -1.429710 | -1.440439 | 1.716027  |
| H | -1.802783 | 1.100396  | -1.715643 |
| H | -3.868975 | -1.852486 | 1.679724  |
| H | -4.235815 | 0.678048  | -1.765095 |
| H | -5.278581 | -0.800403 | -0.069221 |
| C | 0.012103  | 0.087793  | 0.016703  |
| C | 0.911769  | -0.900467 | -0.145390 |
| C | 0.383949  | 1.545362  | 0.202970  |
| C | 2.410651  | -0.674903 | -0.095534 |
| F | -0.618037 | 2.226433  | 0.786236  |

|   |           |           |           |
|---|-----------|-----------|-----------|
| F | 1.464500  | 1.725842  | 0.971234  |
| F | 0.617804  | 2.147140  | -0.982469 |
| F | 2.846709  | -0.550774 | 1.170500  |
| F | 2.814717  | 0.401145  | -0.783141 |
| F | 3.070601  | -1.727868 | -0.620897 |
| C | 0.535088  | -2.327837 | -0.381661 |
| H | 0.915415  | -2.968043 | 0.421180  |
| H | -0.541296 | -2.459894 | -0.449945 |
| H | 0.993231  | -2.693455 | -1.30368  |

- <sup>1</sup> M. W. Carson, M. W. Giese, M. J. Coghlan, *Org. Lett.* **2008**, *10*, 2701.
- <sup>2</sup> S. Fabig, A. Janiszewski, M. Floß, M. Kreuzahler, G. Haberhauer, *J. Org. Chem.* **2018**, *83*, 7878.
- <sup>3</sup> S. Gao, H. Liu, Z. Wu, H. Yao, A. Lin, *Green Chem.* **2017**, *19*, 1861.
- <sup>4</sup> P. Tang, T. Furuya, T. Ritter, *J. Am. Chem. Soc.* **2010**, *132*, 12150.
- <sup>5</sup> P. Prabhala, H. M. Savanur, R. G. Kalkhambkar, K. K. Laali, *Eur. J. Org. Chem.* **2019**, *10*, 2061.
- <sup>6</sup> Y. Xia, L. Wang, A. Studer, *Angew. Chem. Int. Ed.* **2018**, *57*, 12940.
- <sup>7</sup> P. K. Shyam, H.-Y. Jang, *J. Org. Chem.* **2017**, *82*, 1761.
- <sup>8</sup> Gaussian, M. J. Frisch, G. W. Trucks, H. B. Schlegel, G. E. Scuseria, M. A. Robb, J. R. Cheeseman, G. Scalmani, V. Barone, B. Mennucci, G. A. Petersson, H. Nakatsuji, M. Caricato, X. Li, H. P. Hratchian, A. F. Izmaylov, J. Bloino, G. Zheng, J. L. Sonnenberg, M. Hada, M. Ehara, K. Toyota, R. Fukuda, J. Hasegawa, M. Ishida, T. Nakajima, Y. Honda, O. Kitao, H. Nakai, T. Vreven, J. A. Montgomery, Jr., J. E. Peralta, F. Ogliaro, M. Bearpark, J. J. Heyd, E. Brothers, K. N. Kudin, V. N. Staroverov, R. Kobayashi, J. Normand, K. Raghavachari, A. Rendell, J. C. Burant, S. S. Lyengar, J. Tomasi, M. Cossi, N. Rega, J. M. Millam, M. Klene, J. E. Knox, J. B. Cross, V. Bakken, C. Adamo, J. Jaramillo, R. Gomperts, R. E. Stratmann, O. Yazyev, A. J. Austin, R. Cammi, C. Pomelli, J. W. Ochterski, R. L. Martin, K. Morokuma, V. G. Zakrzewski, G. A. Voth, P. Salvador, J. J. Dannenberg, S. Dapprich, A. D. Daniels, Ö. Farkas, J. B. Foresman, J. V. Ortiz, J. Cioslowski, D. J. Fox, Gaussian, Inc., Wallingford CT, 2009.
- <sup>9</sup> Y. Zhao, D. G. Truhlar, *J. Chem. Phys.* **2006**, *125*, 194101.
- <sup>10</sup> Y. Zhao, D. G. Truhlar, *Acc. Chem. Res.* **2008**, *41*, 157.
- <sup>11</sup> (a) W. J. Hehre, R. Ditchfield, J. A. Pople, *J. Chem. Phys.* **1972**, *56*, 2257; (b) P. C. Hariharan, J. A. Pople, *Theor. Chim. Acta.* **1973**, *28*, 213.
- <sup>12</sup> (a) P. J. Hay, W. R. Wadt, *J. Chem. Phys.* **1985**, *82*, 270; (b) W. R. Wadt, P. J. Hay, *J. Chem. Phys.* **1985**, *82*, 284; (c) P. J. Hay, W. R. Wadt, *J. Chem. Phys.* **1985**, *82*, 299.
- <sup>13</sup> (a) F. Weigend, M. Häser, H. Patzelt, R. Ahlrichs, *Chem. Phys. Lett.* **1998**, *294*, 143; (b) F. Weigend, R. Ahlrichs, *Chem. Chem. Phys.* **2005**, *7*, 3297.
- <sup>14</sup> W. Humphrey, A. Dalke, K. Schulten, *J. Molec. Graphics*, **1996**, *14*, 33.
- <sup>15</sup> CYLview, 1.0b; C. Y. Legault, Université de Sherbrooke, 2009 (<http://www.cylview.org>).
- <sup>16</sup> (a) S. Guo, D. I. AbuSalim, S. P. Cook, *Angew. Chem. Int. Ed.* **2019**, *58*, 11704; (b) S. Guo, D. I. AbuSalim, S. P. Cook, *J. Am. Chem. Soc.* **2018**, *140*, 12378.

## IX. Copies of NMR spectra

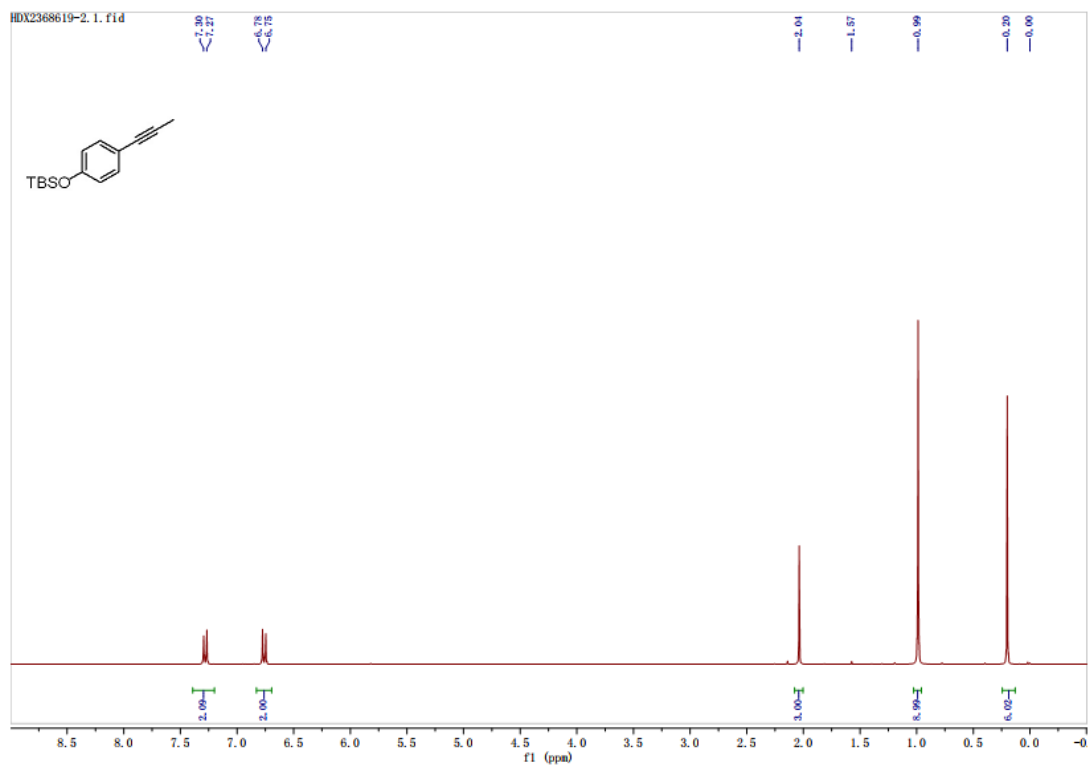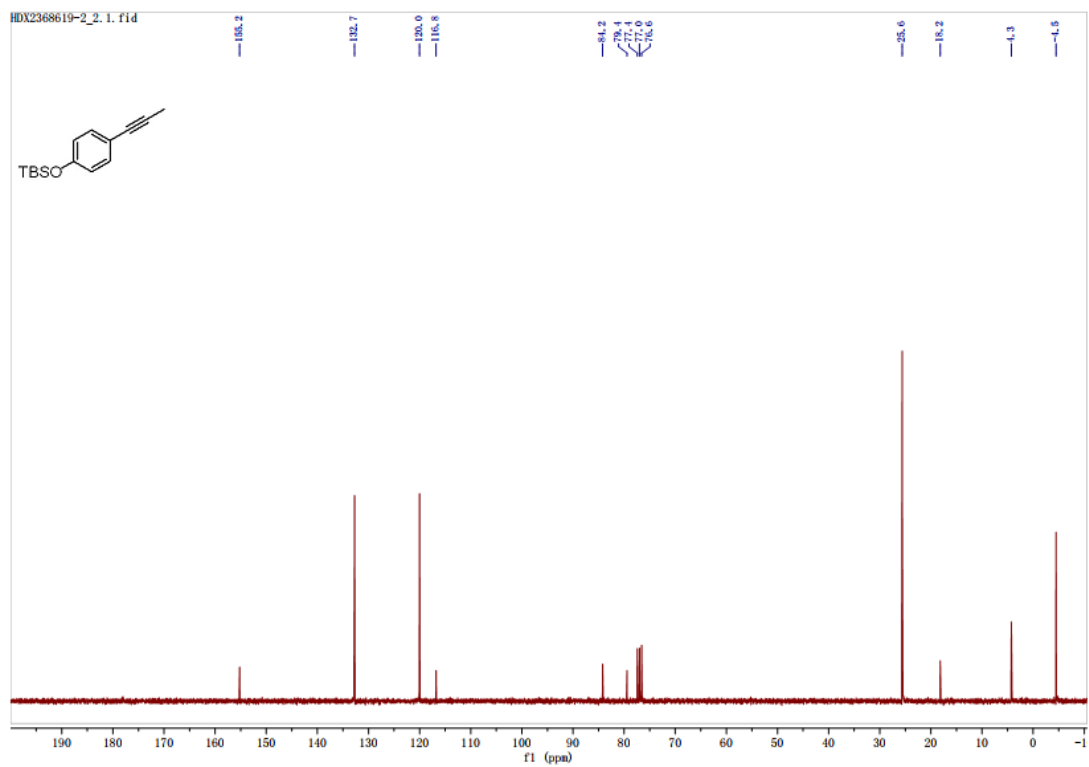

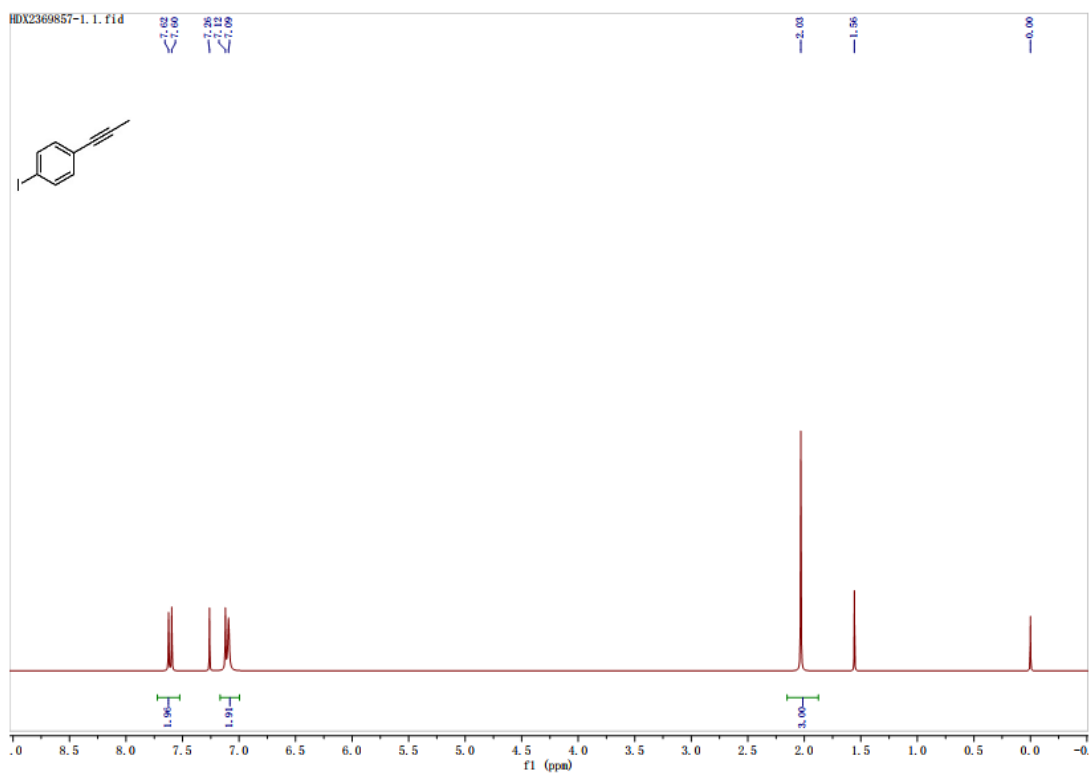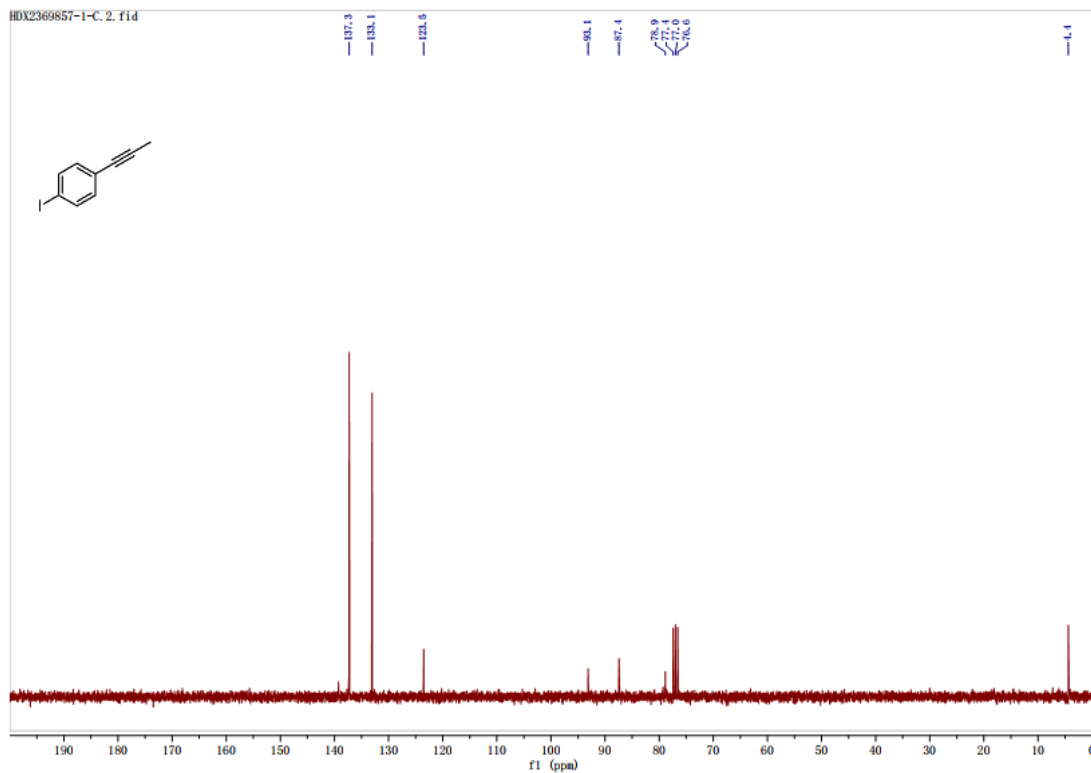

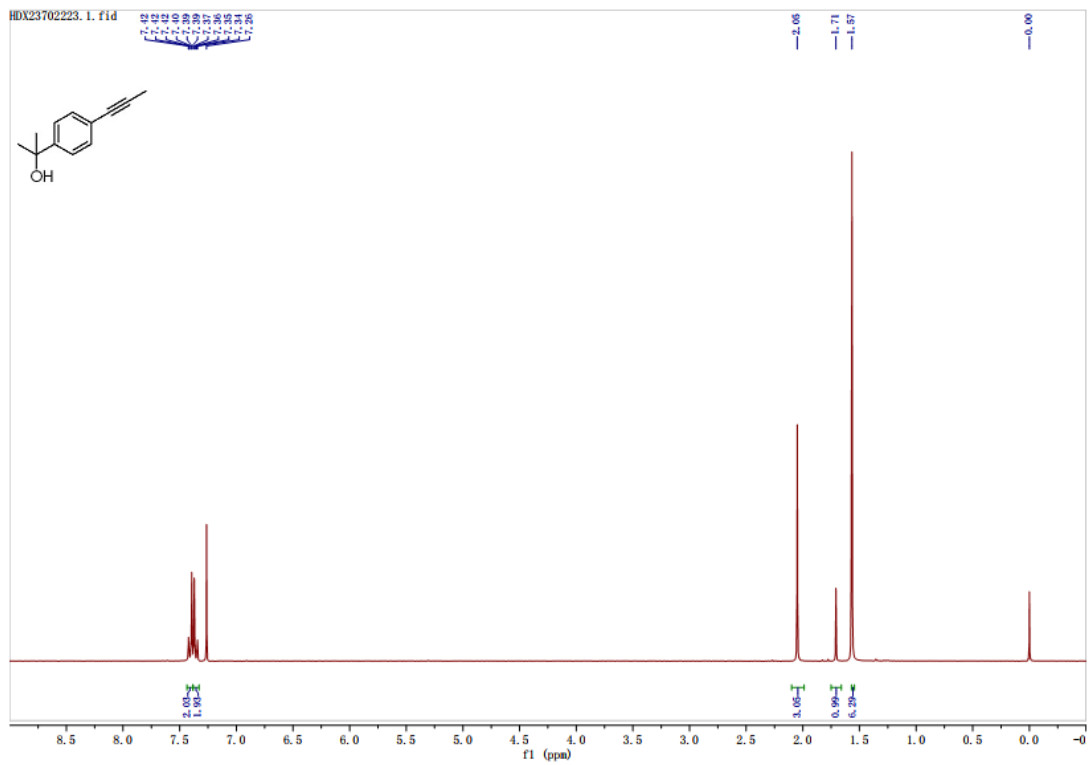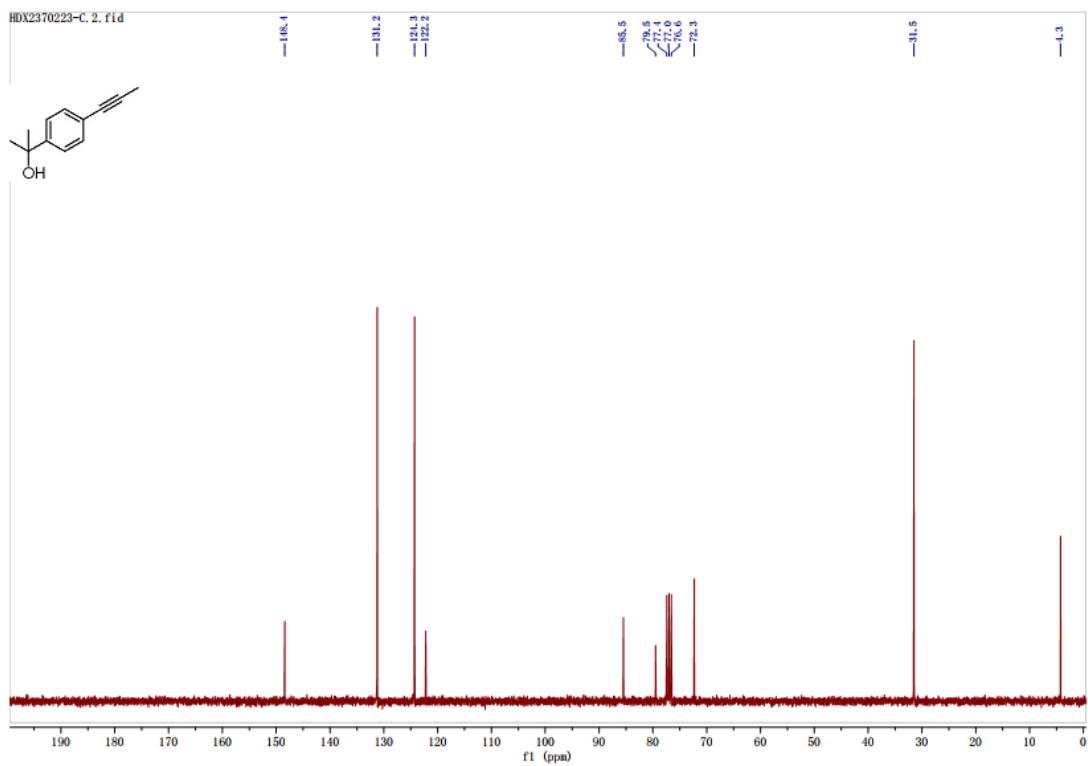

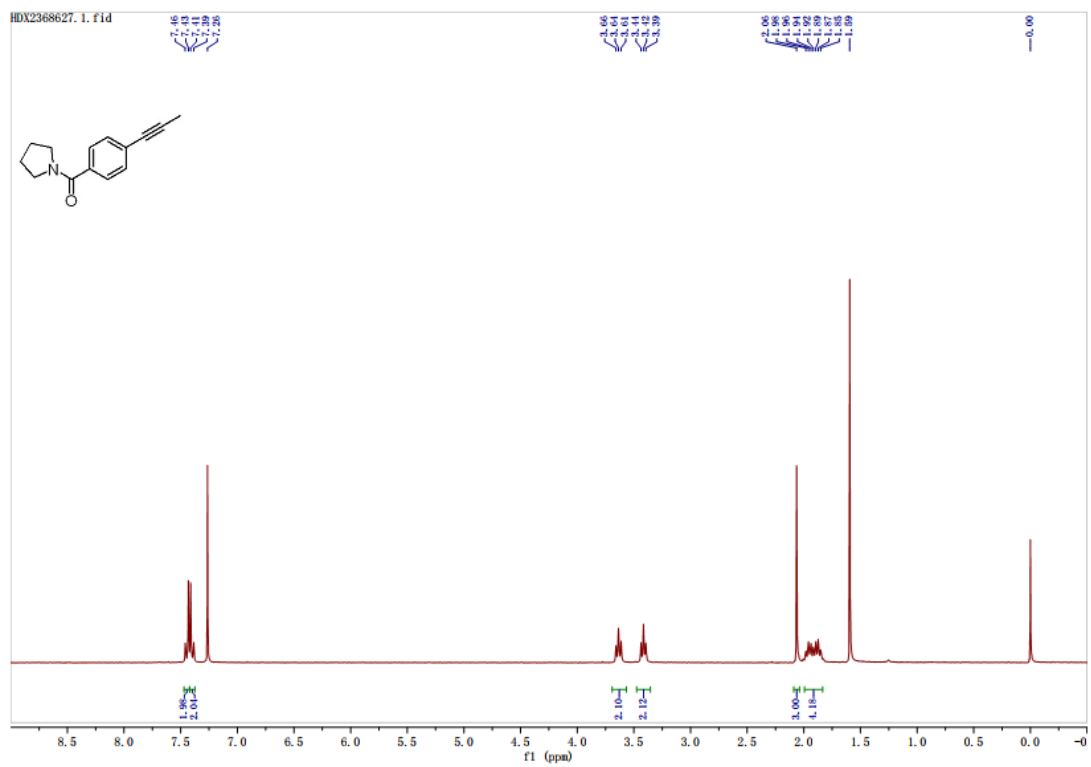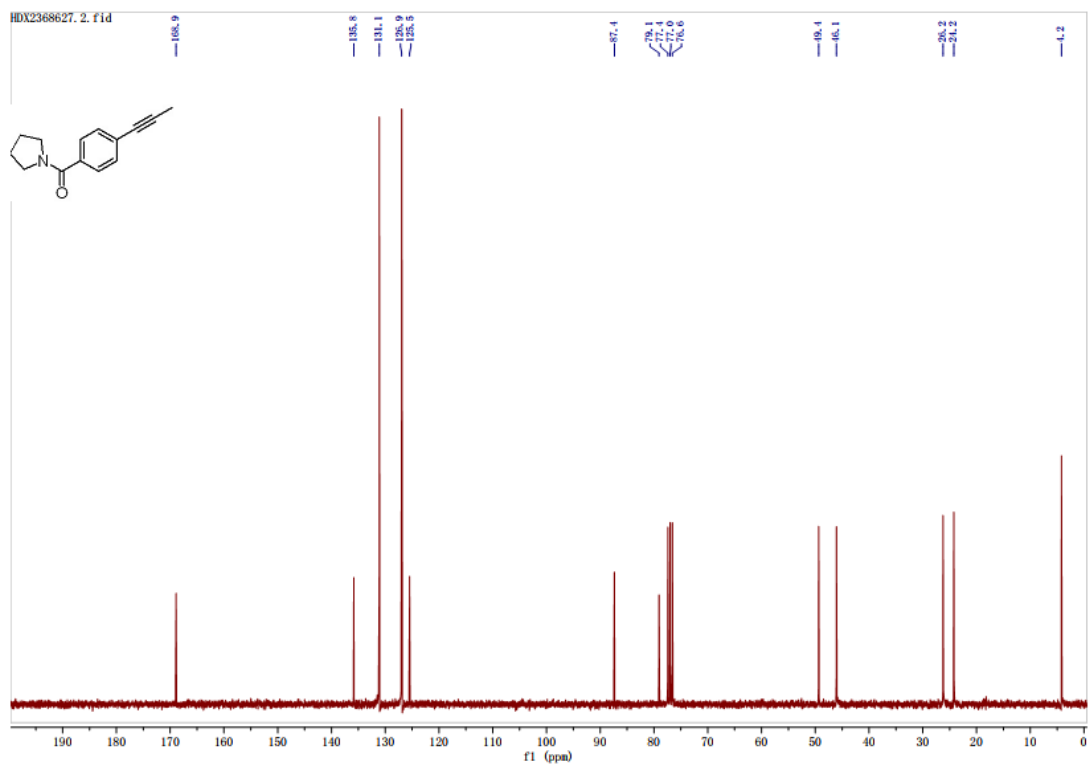

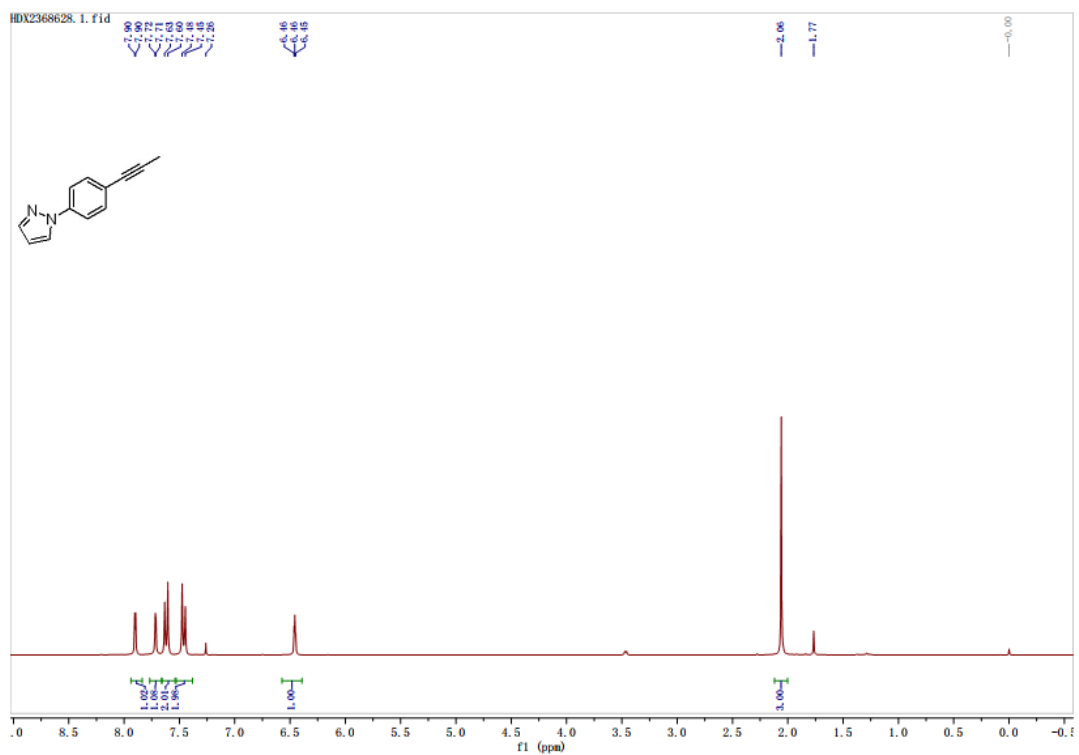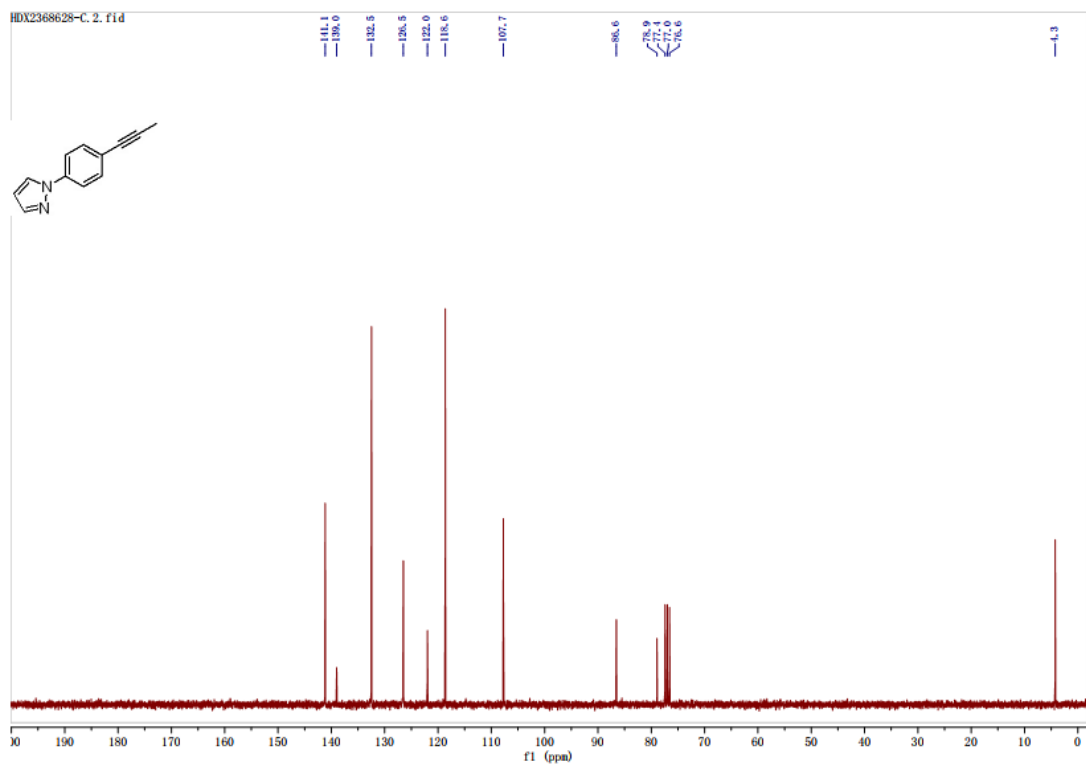



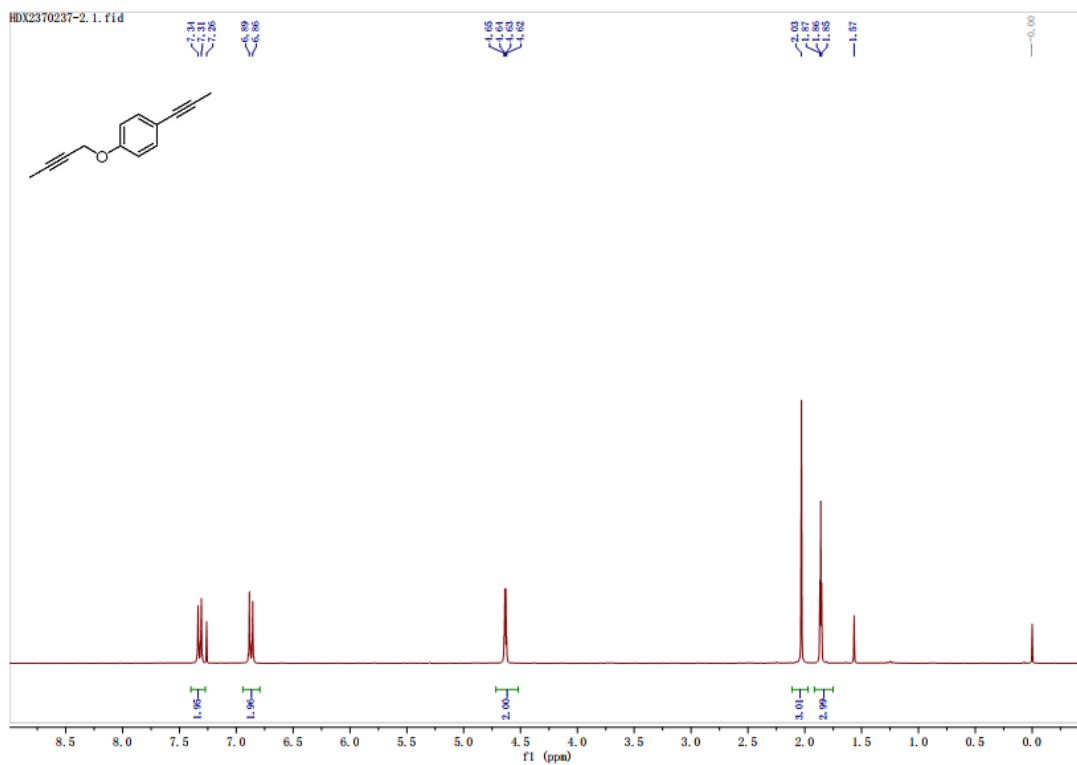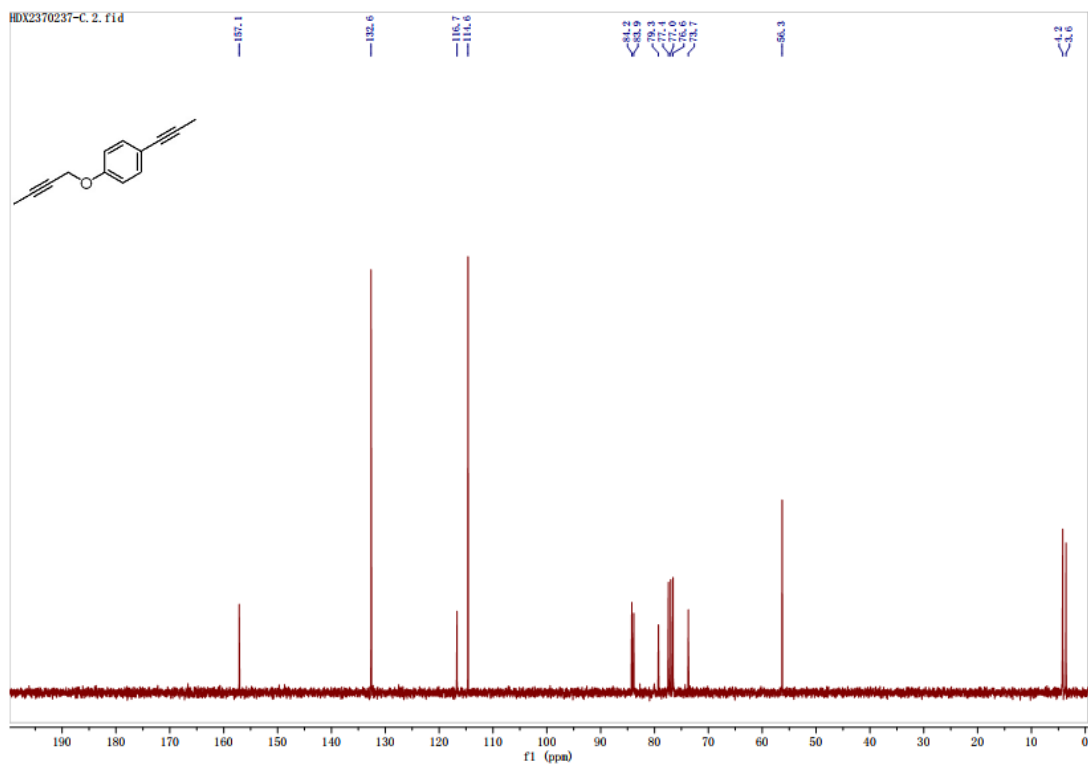

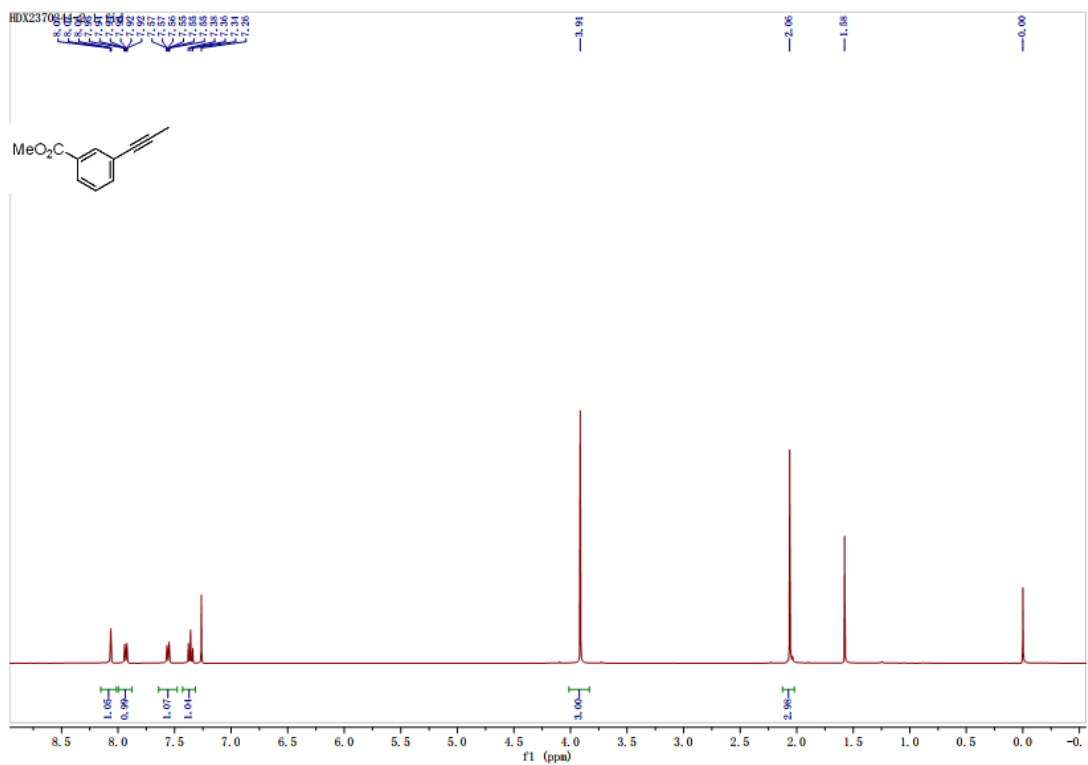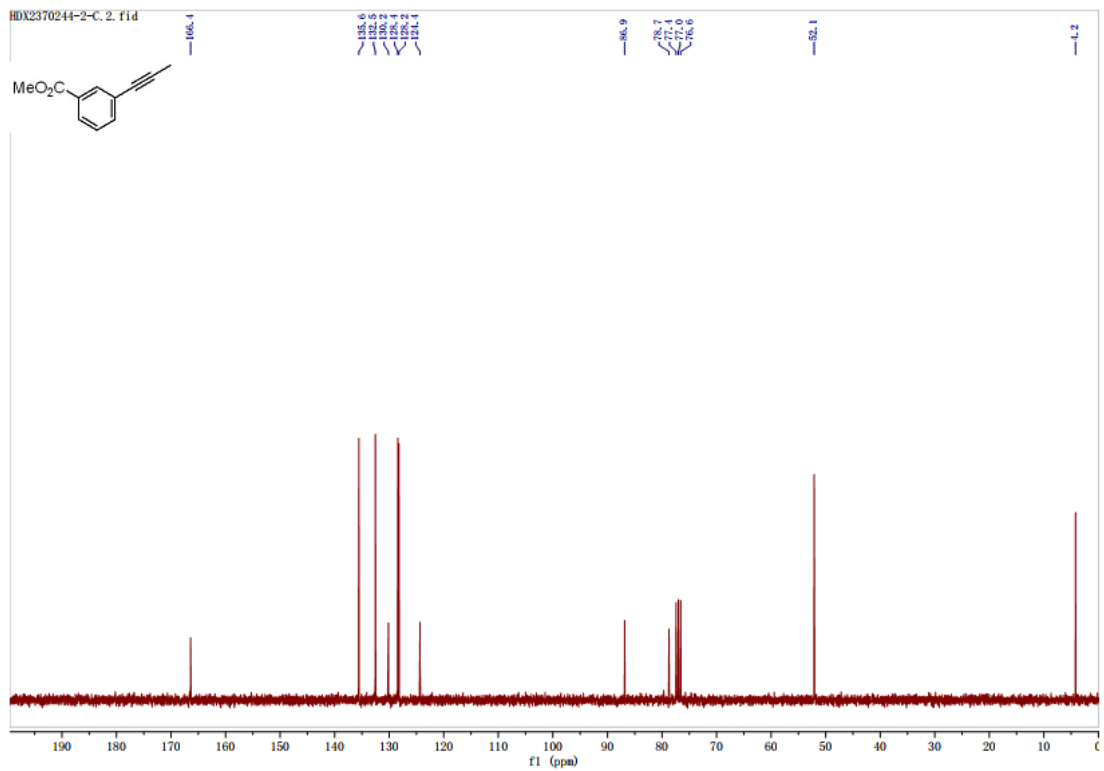

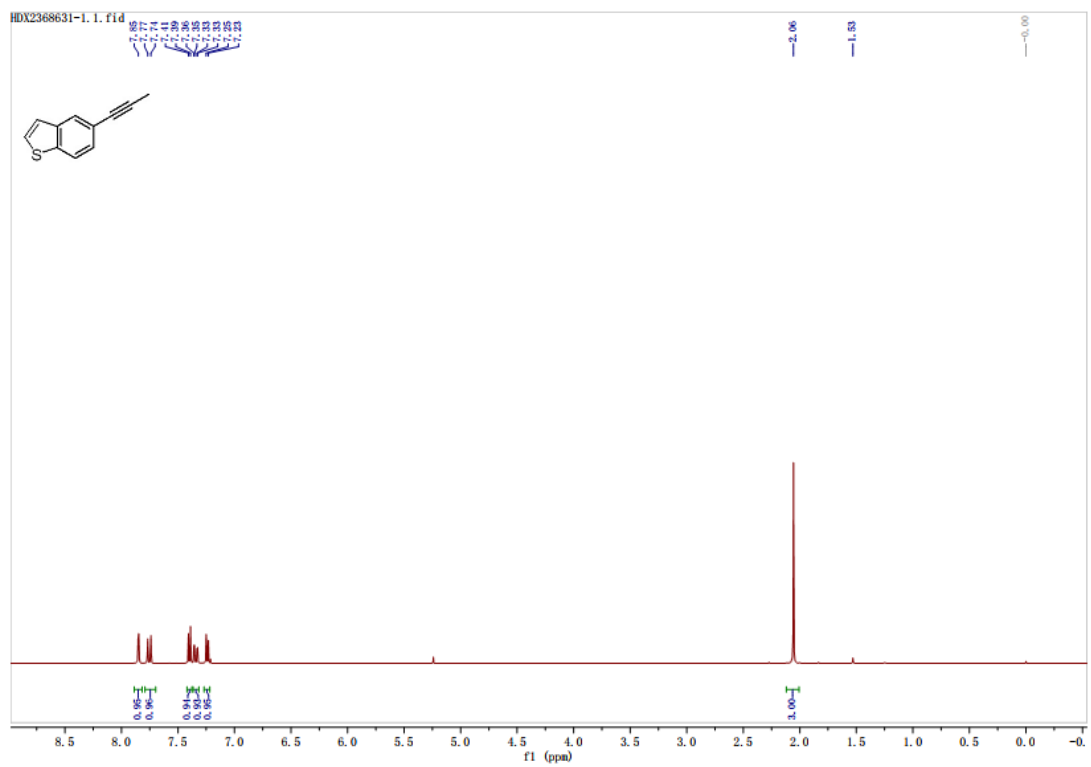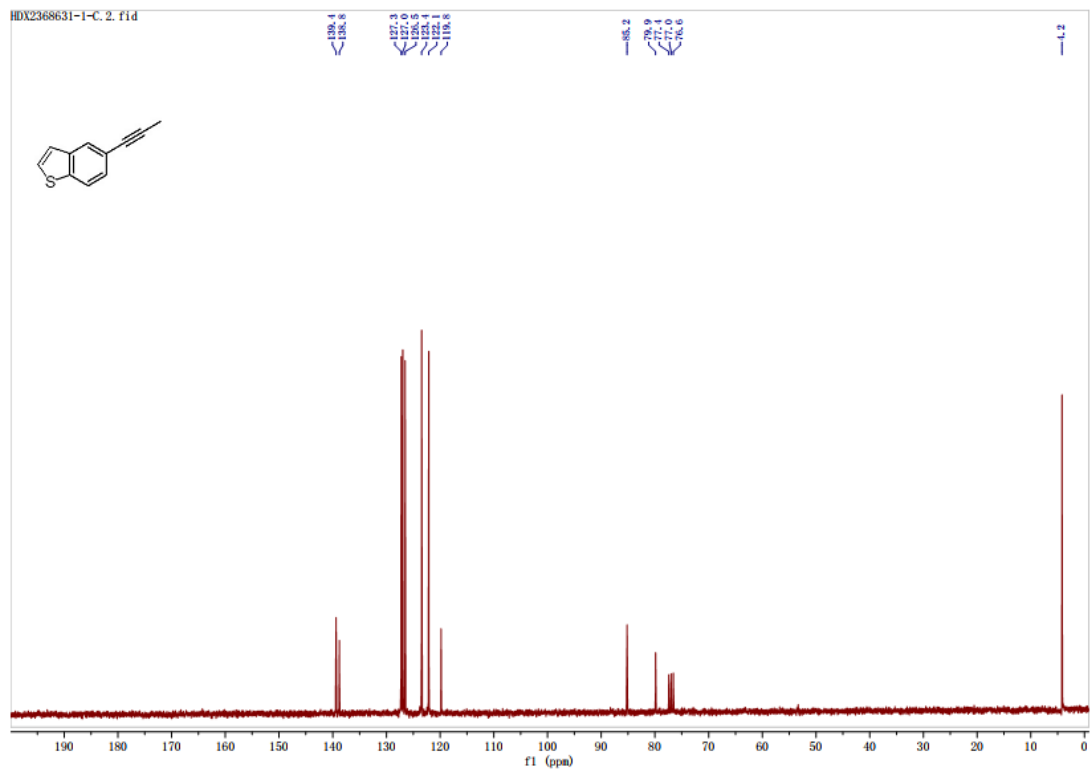

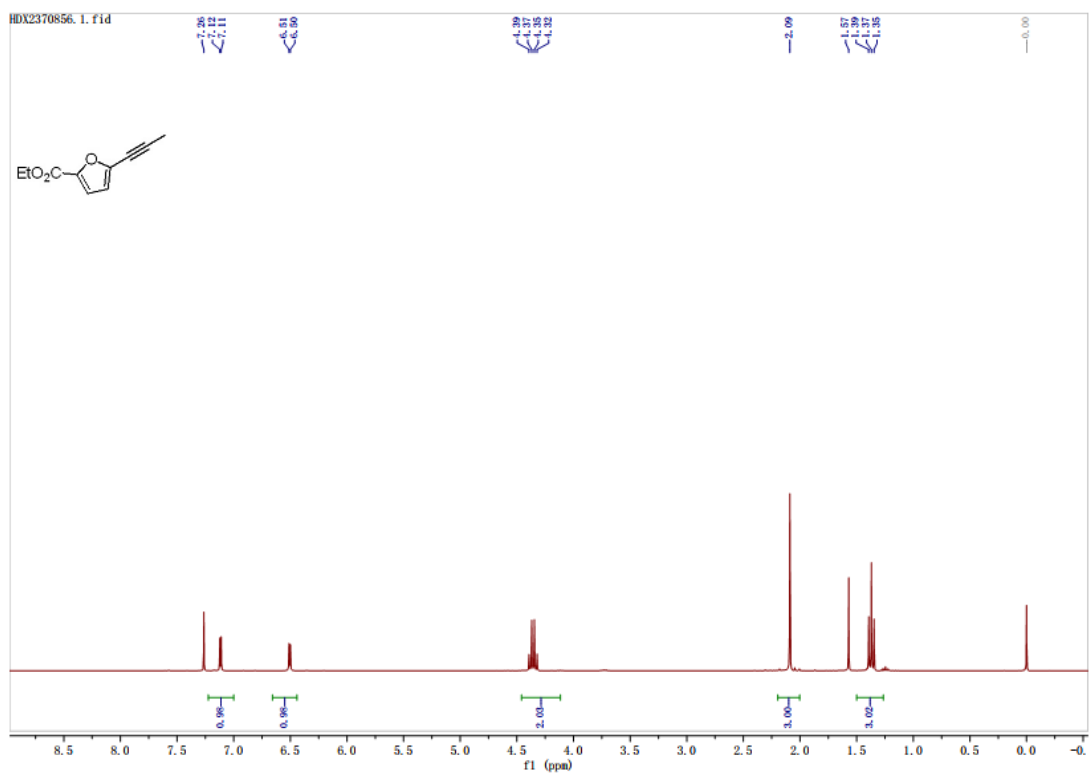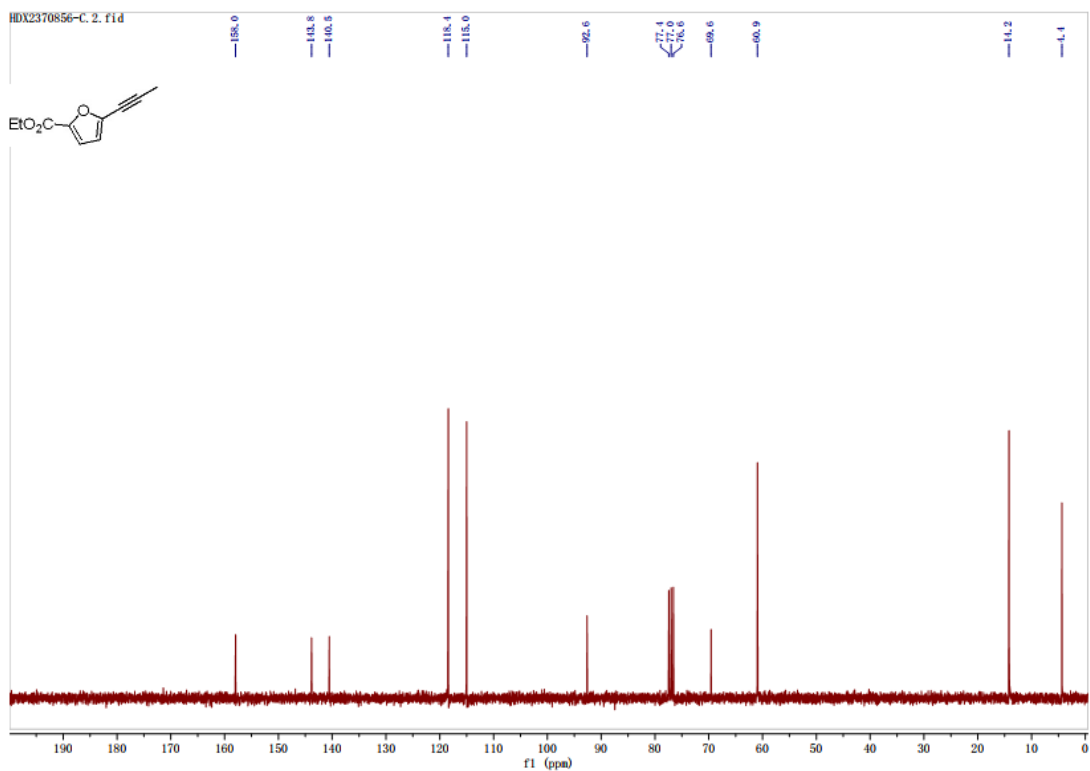

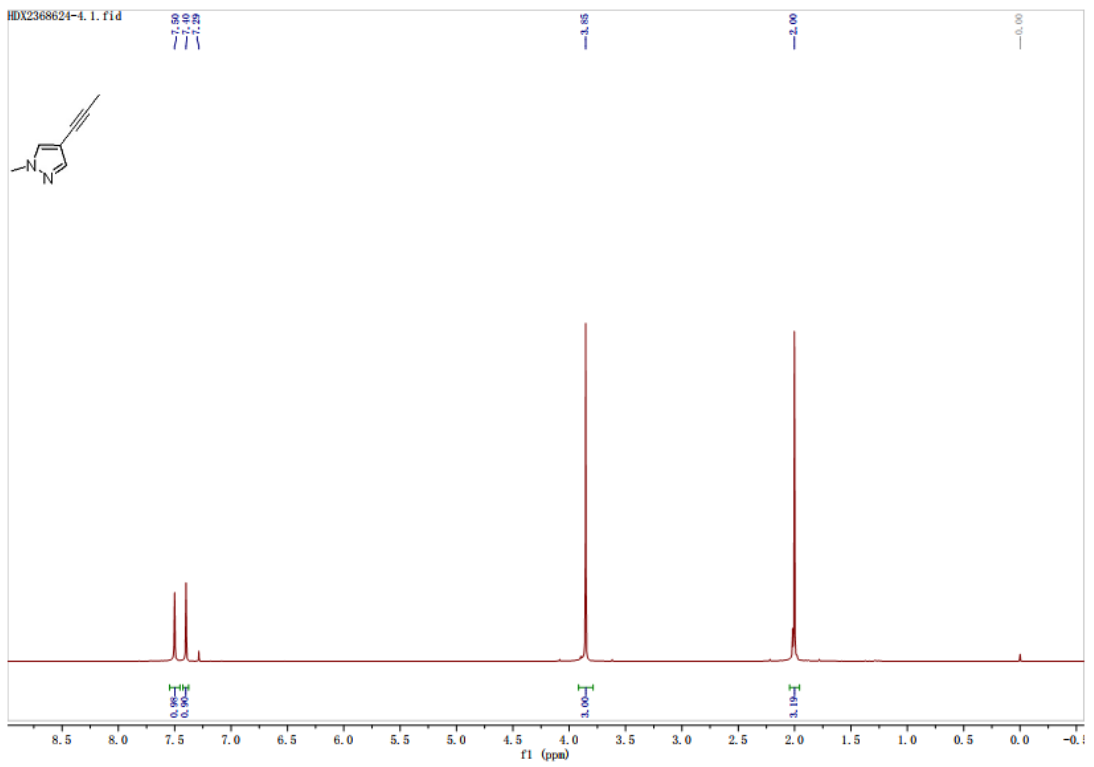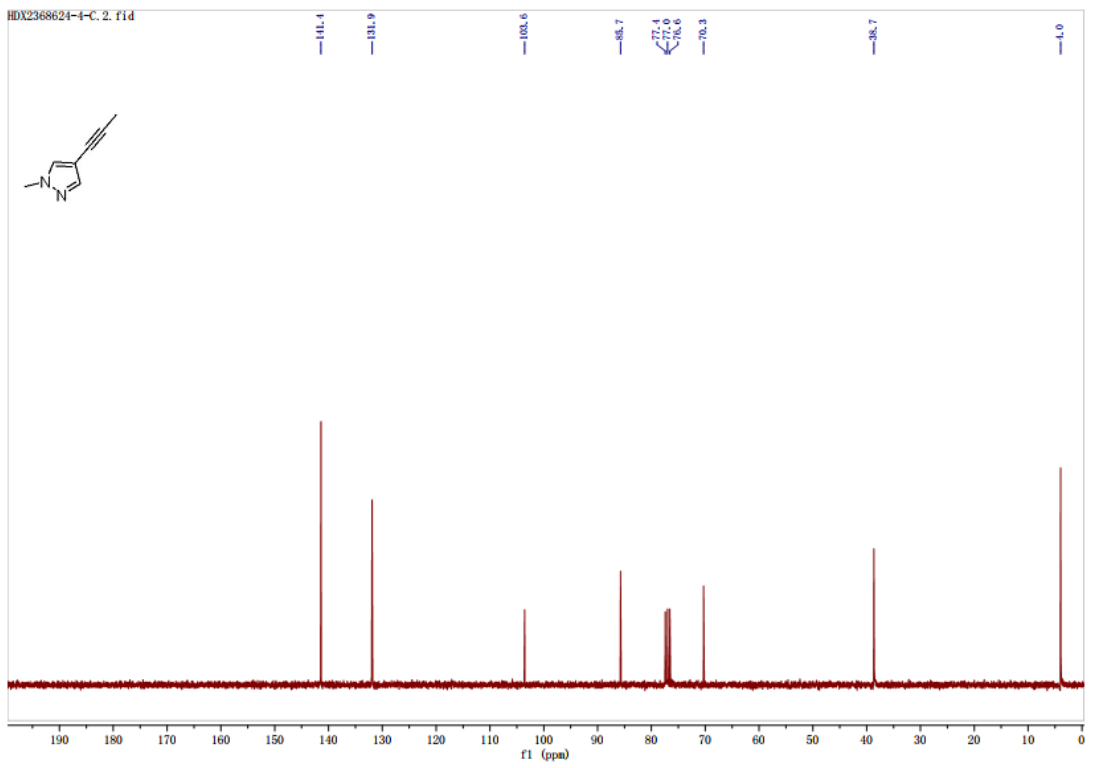

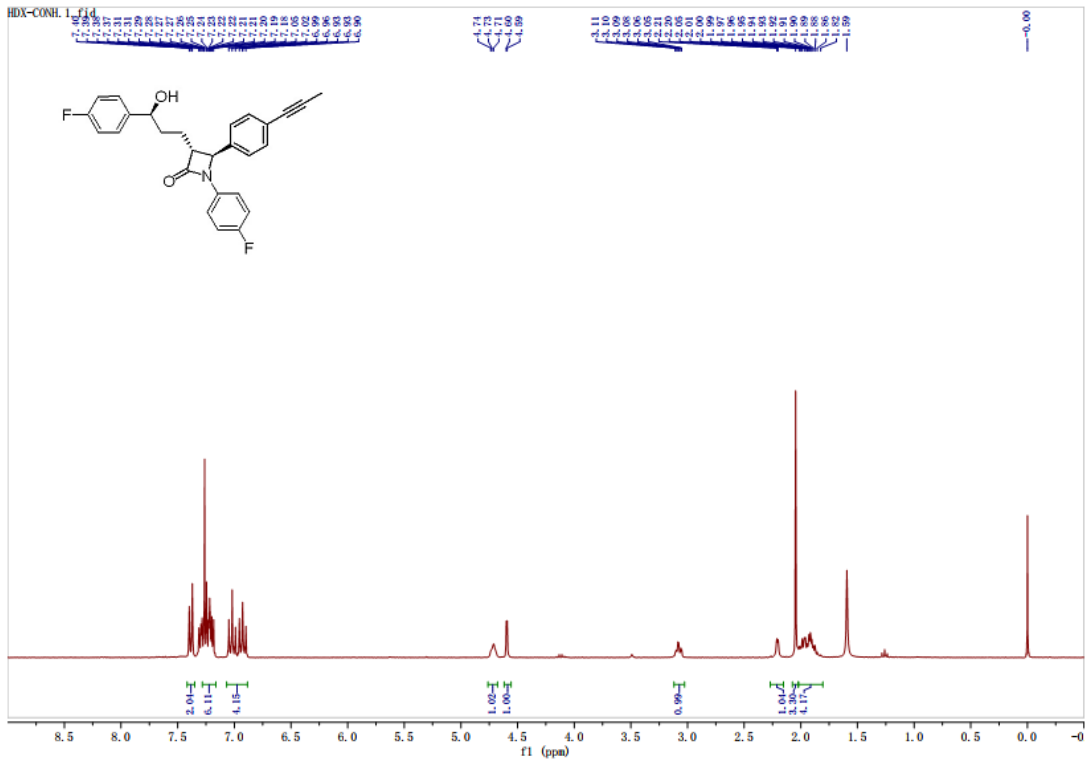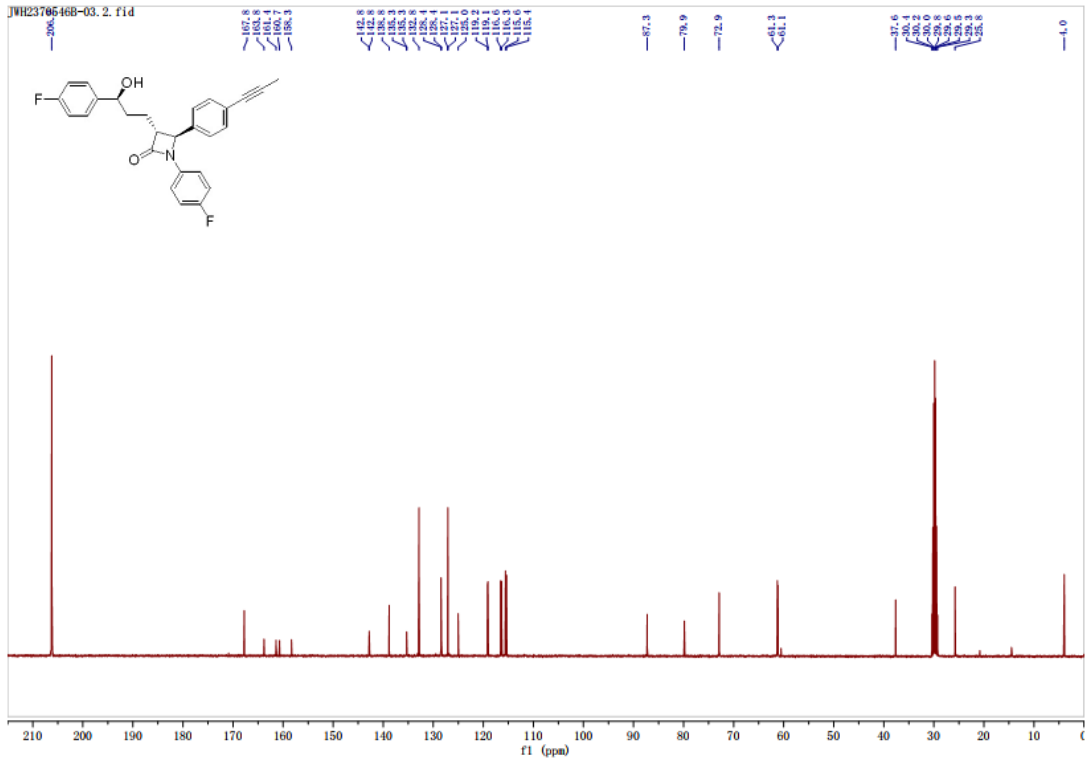

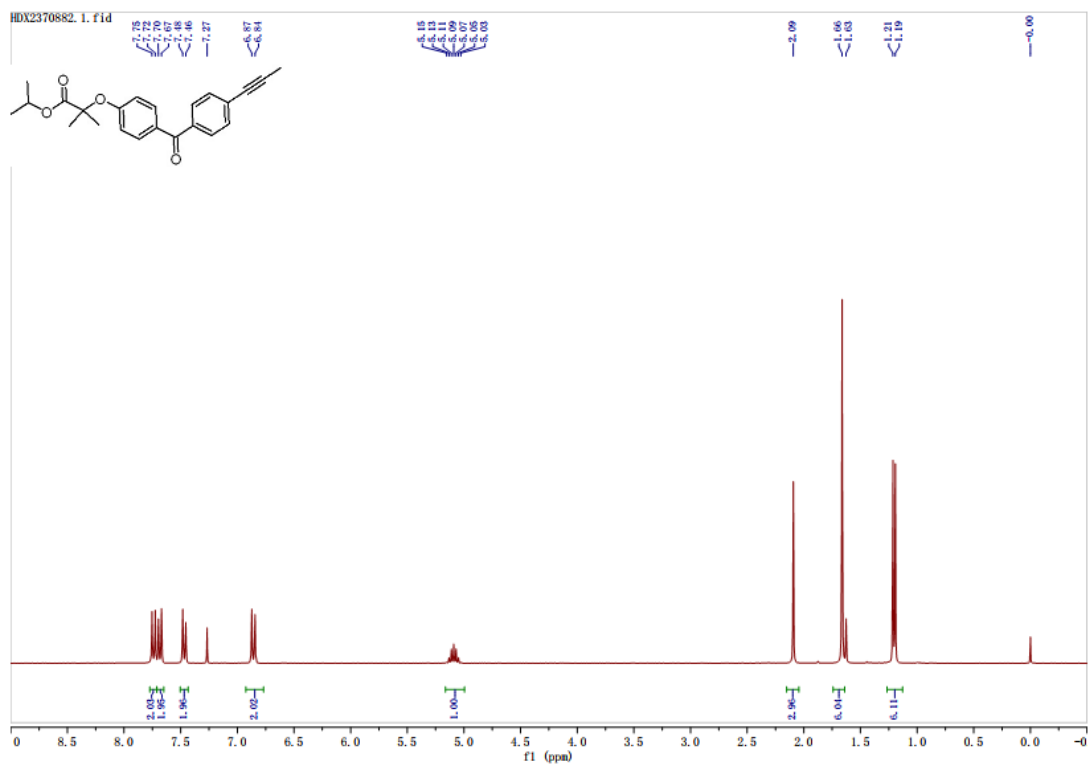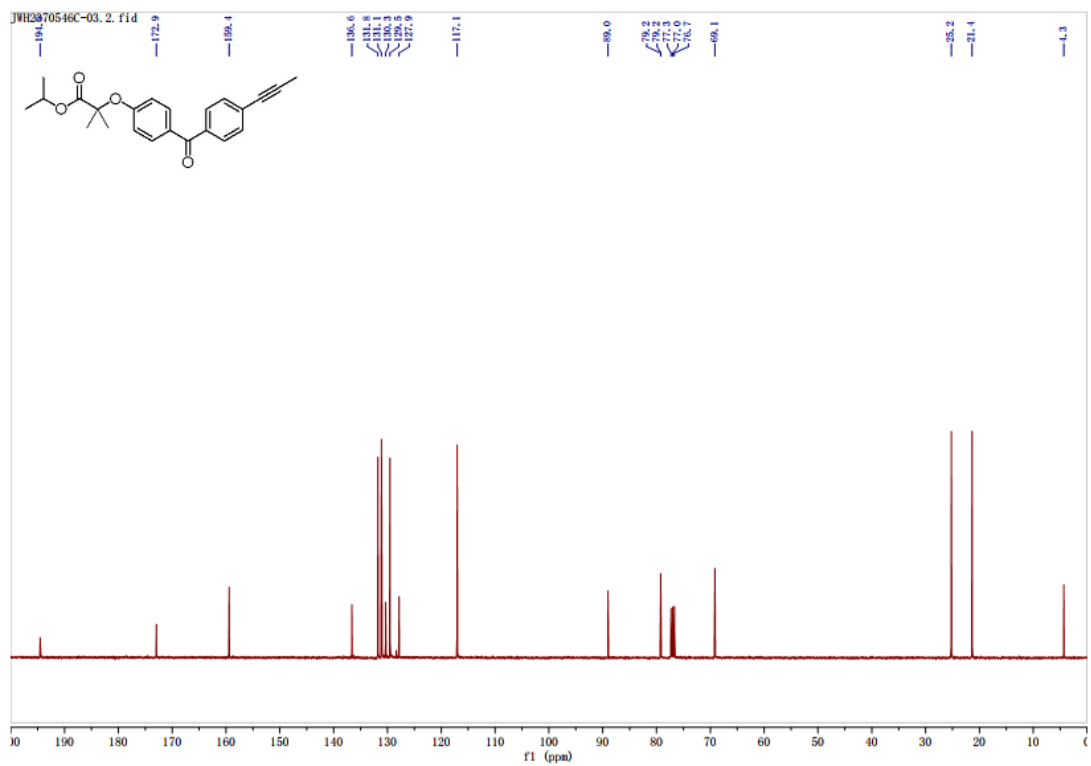

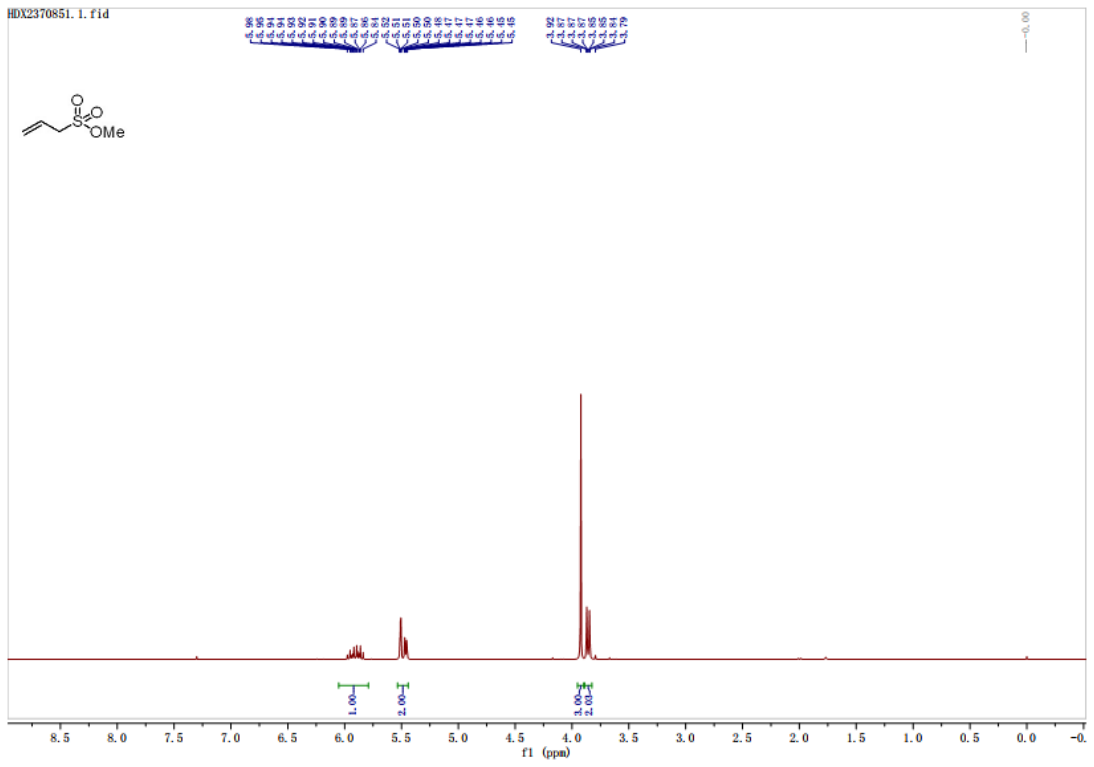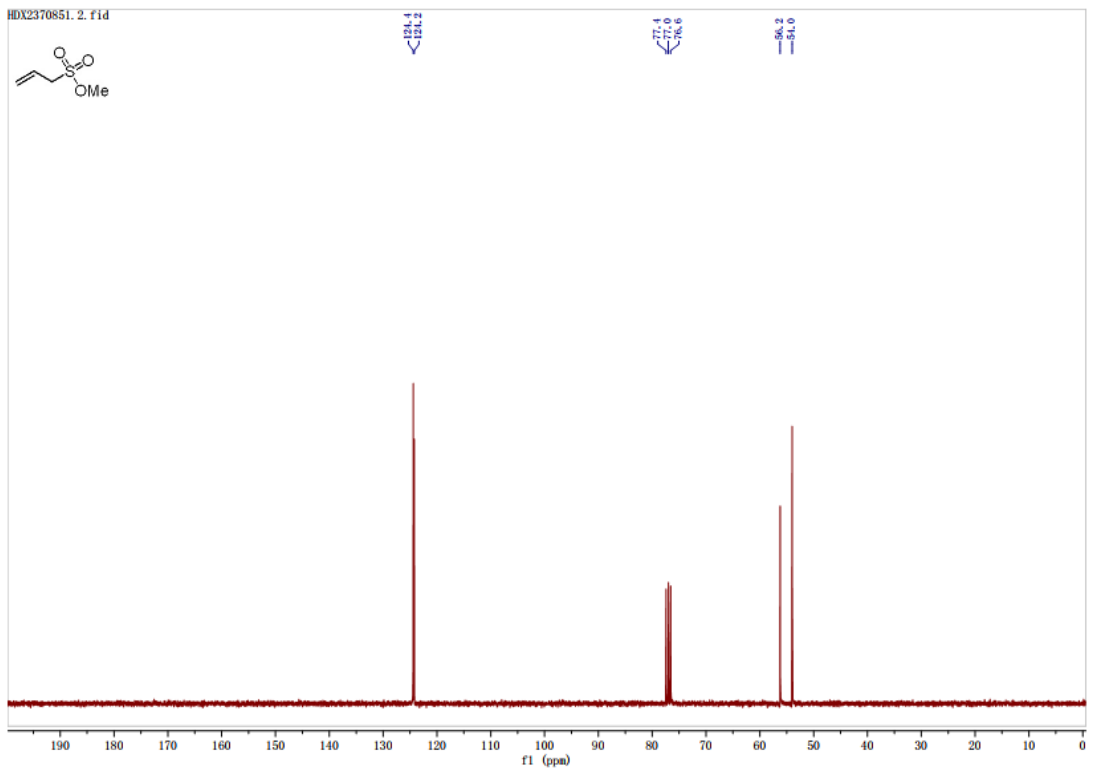



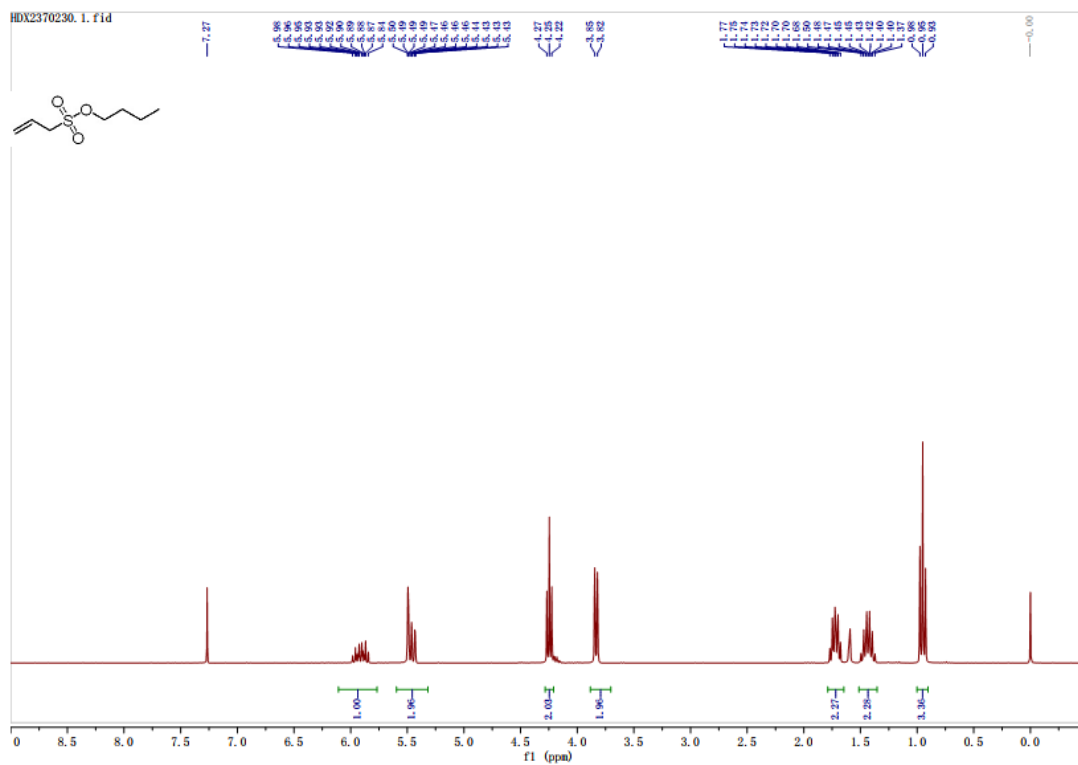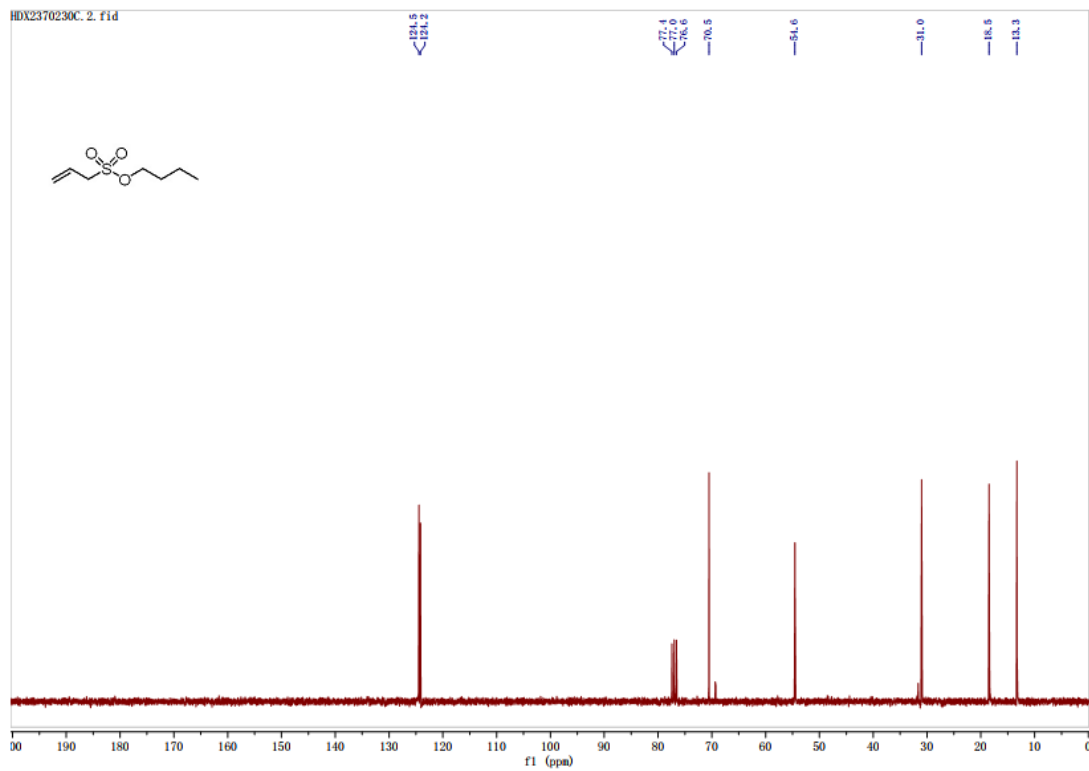

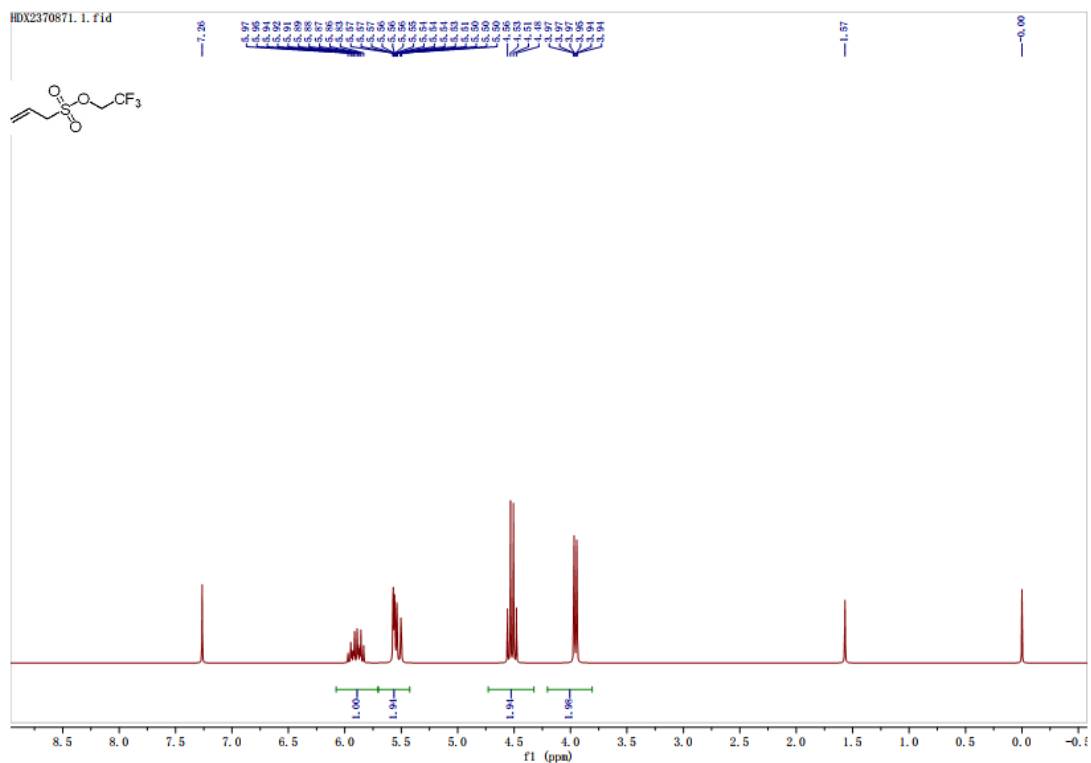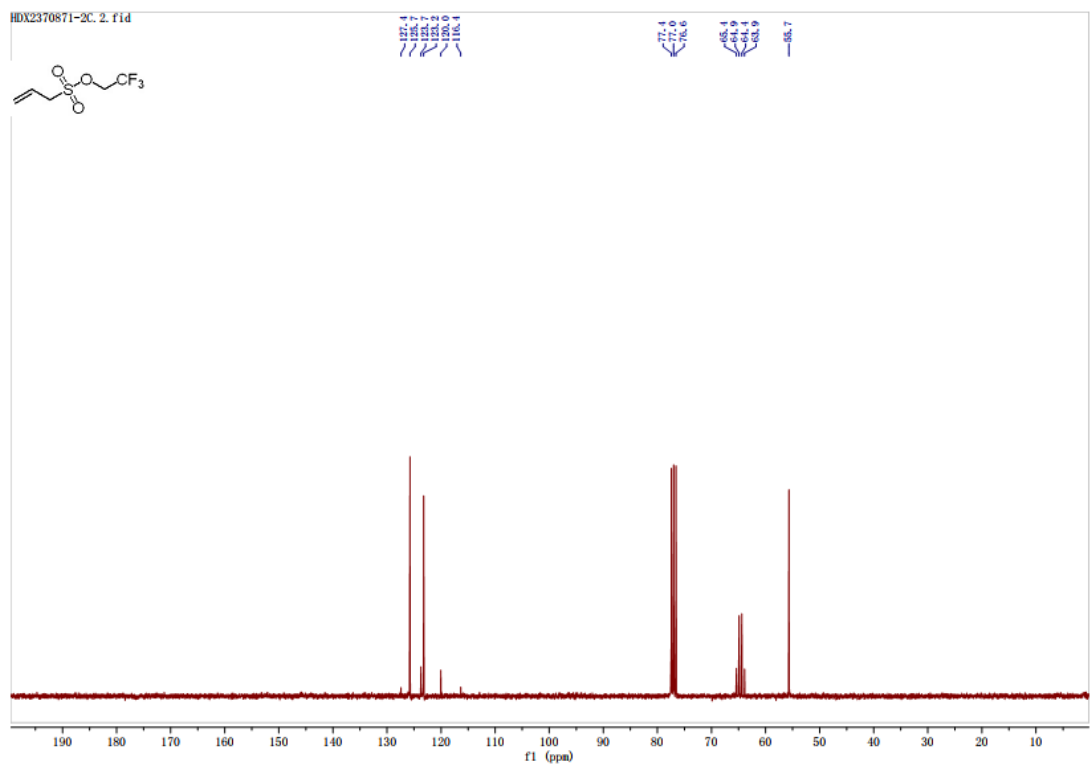

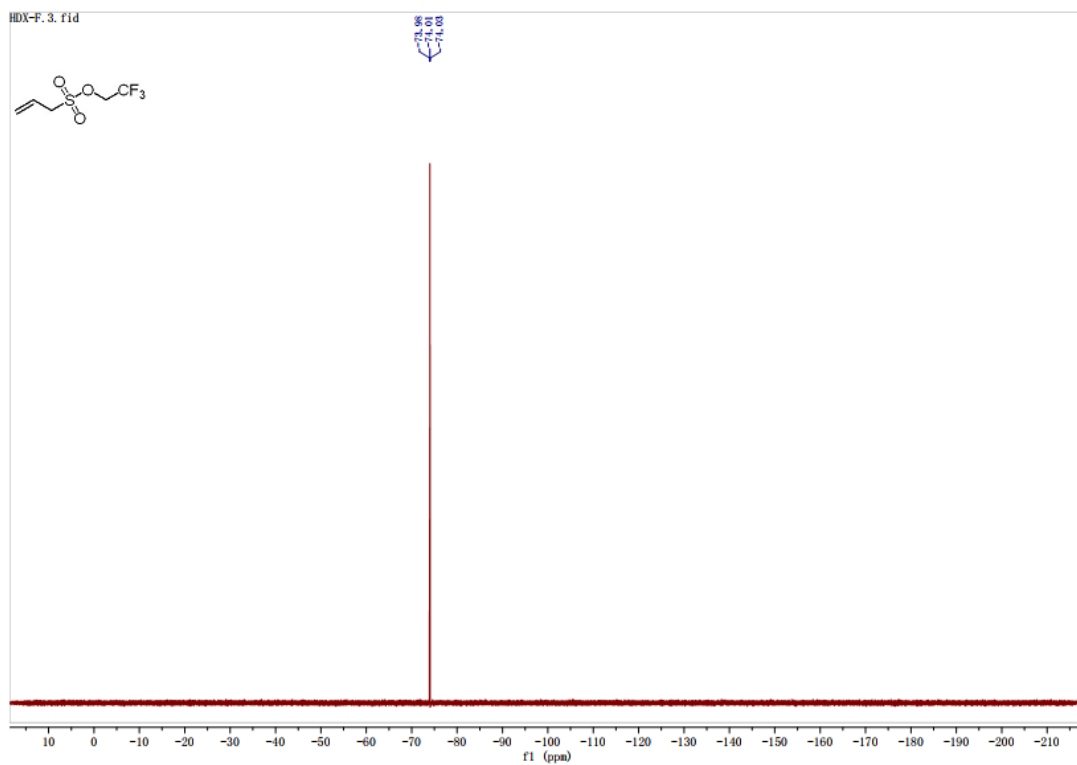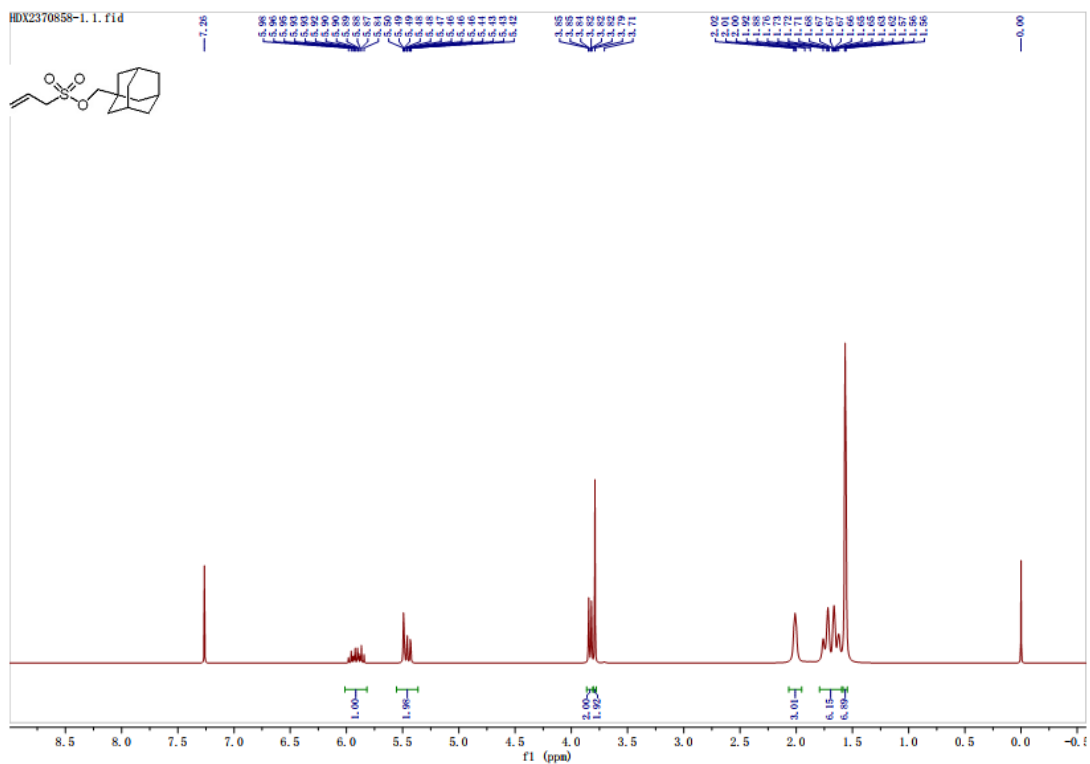

HDX2370858-1-C. 2. f1d

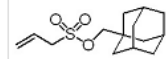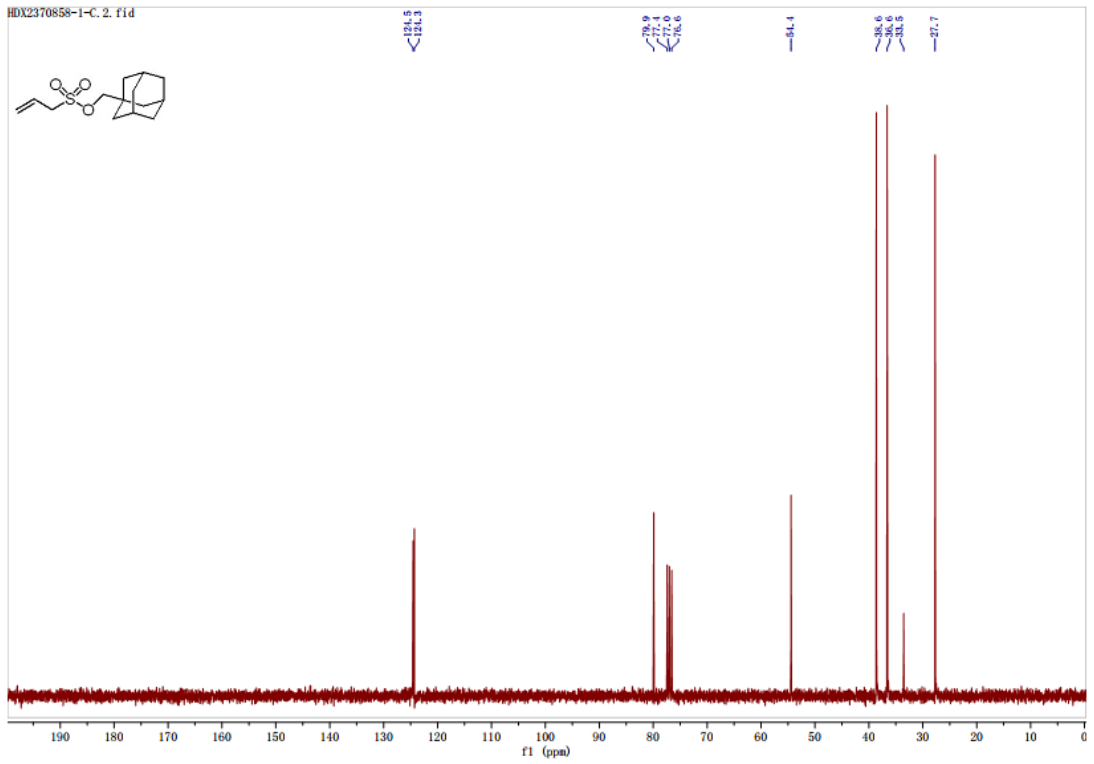

HDX858-3. 1. f1d

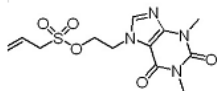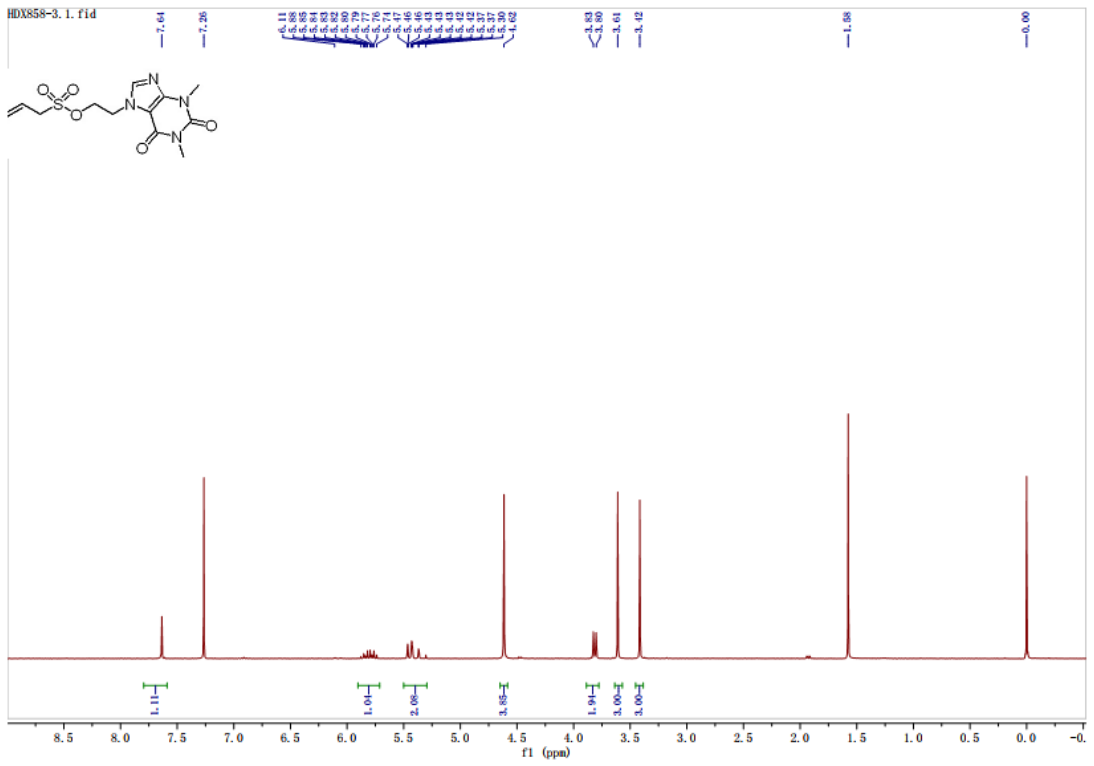

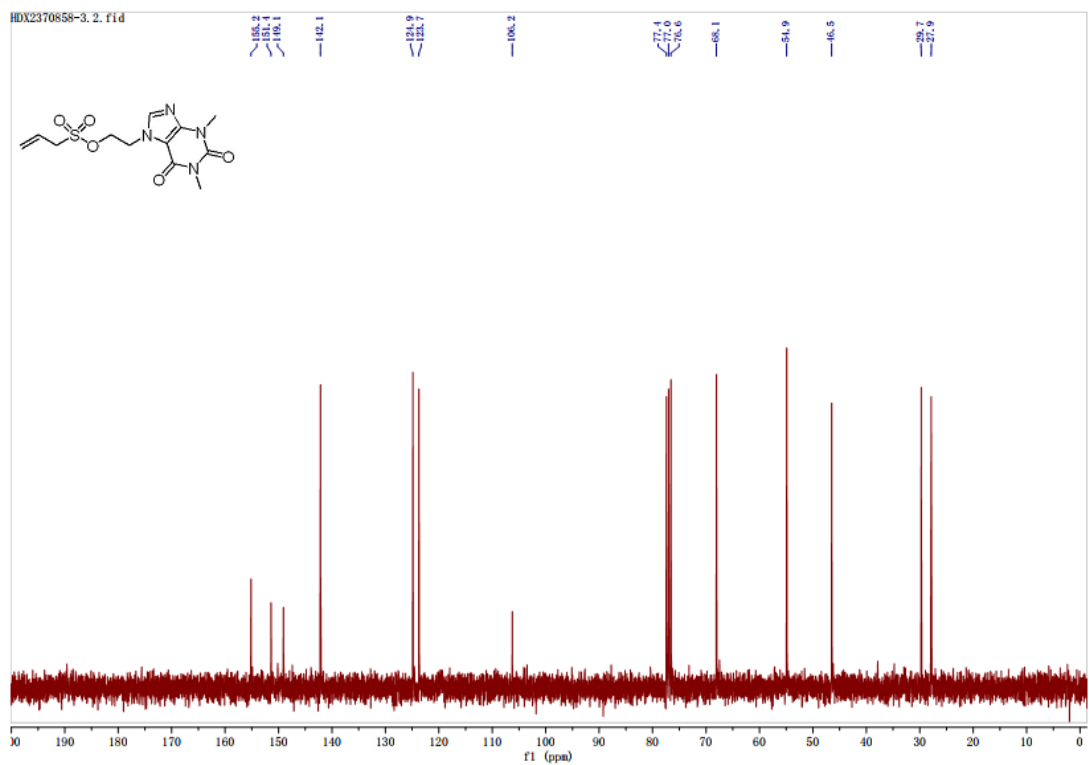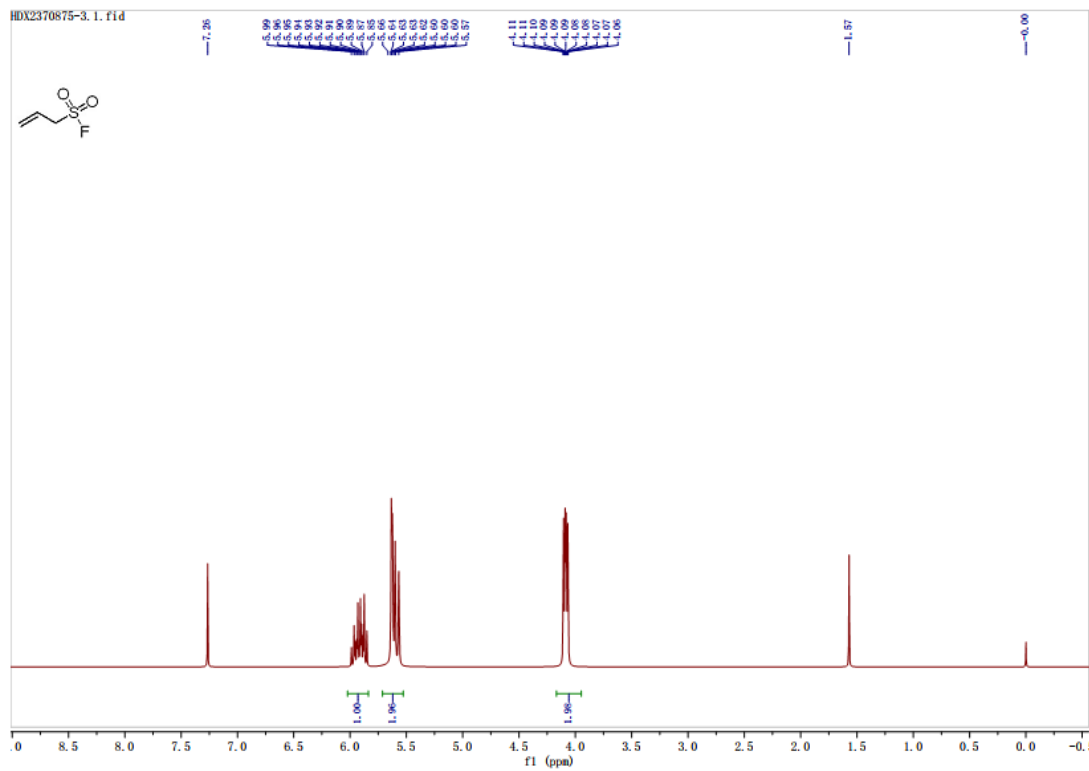

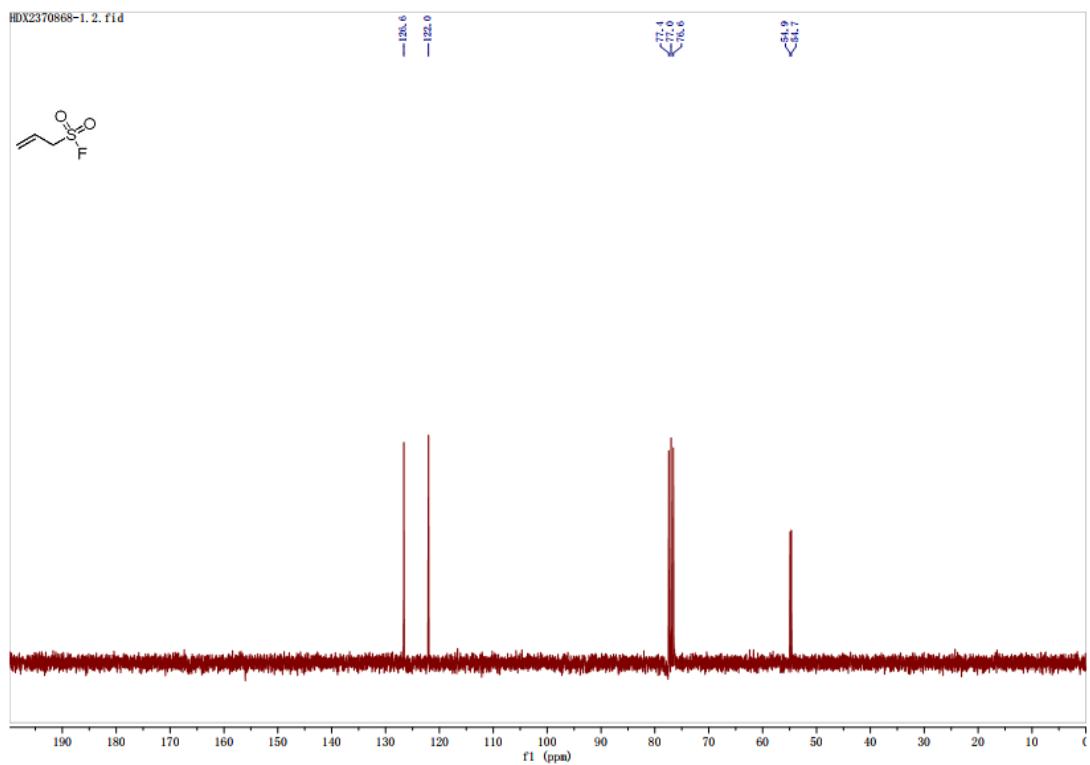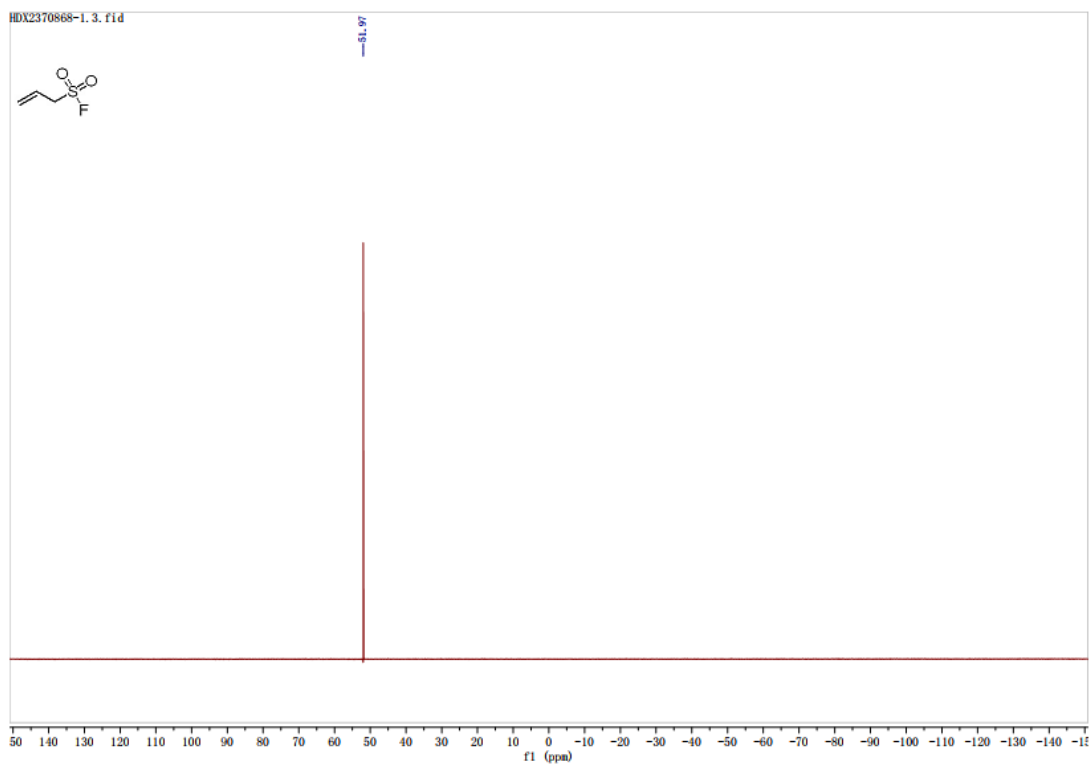

JWH2370098B-1

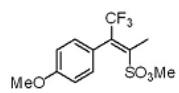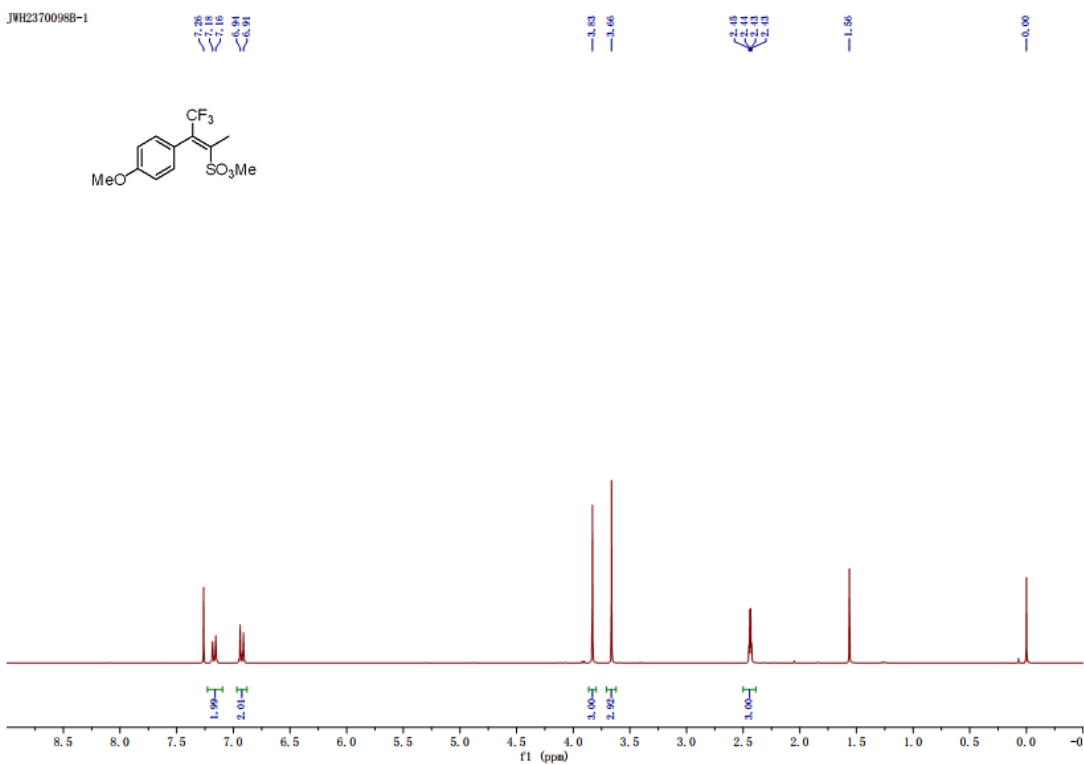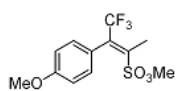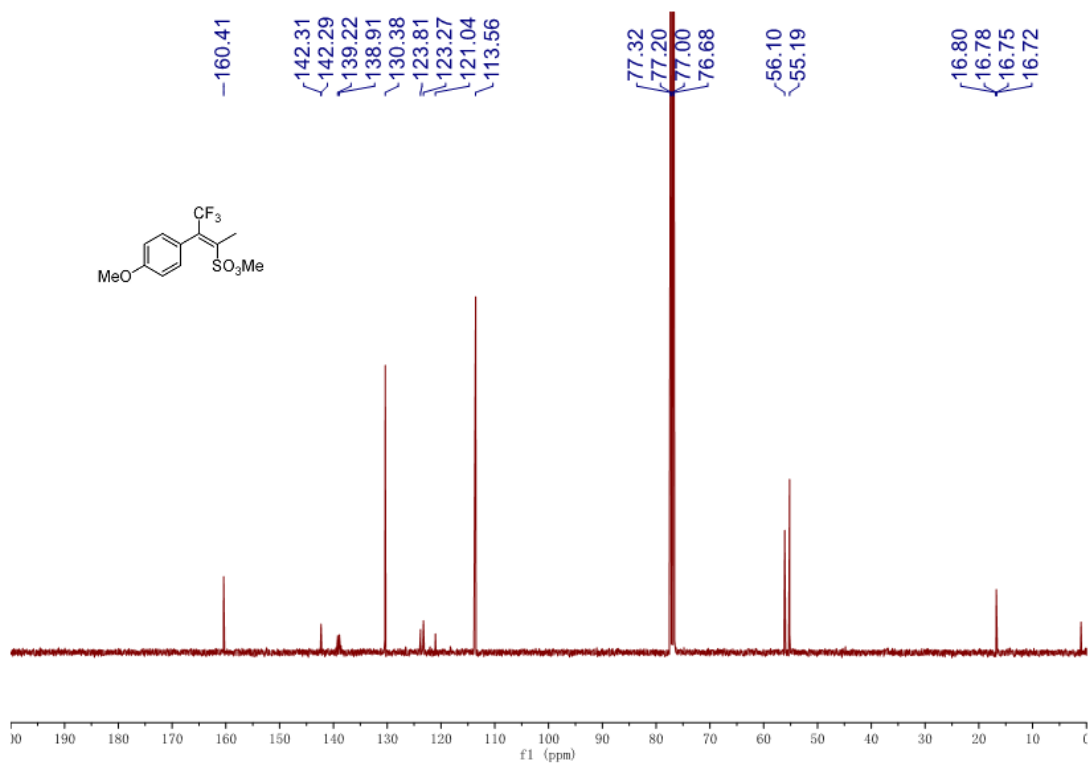

JWH2370098B-1

59.805  
59.802  
59.800  
59.798

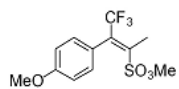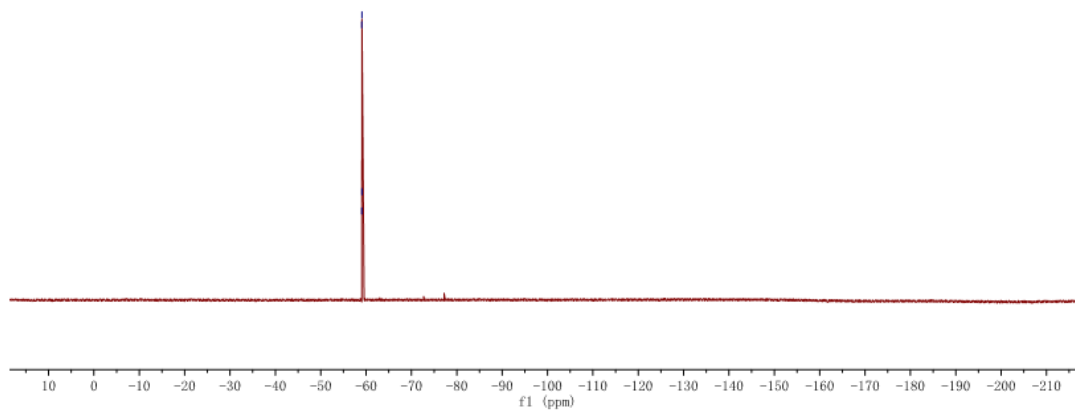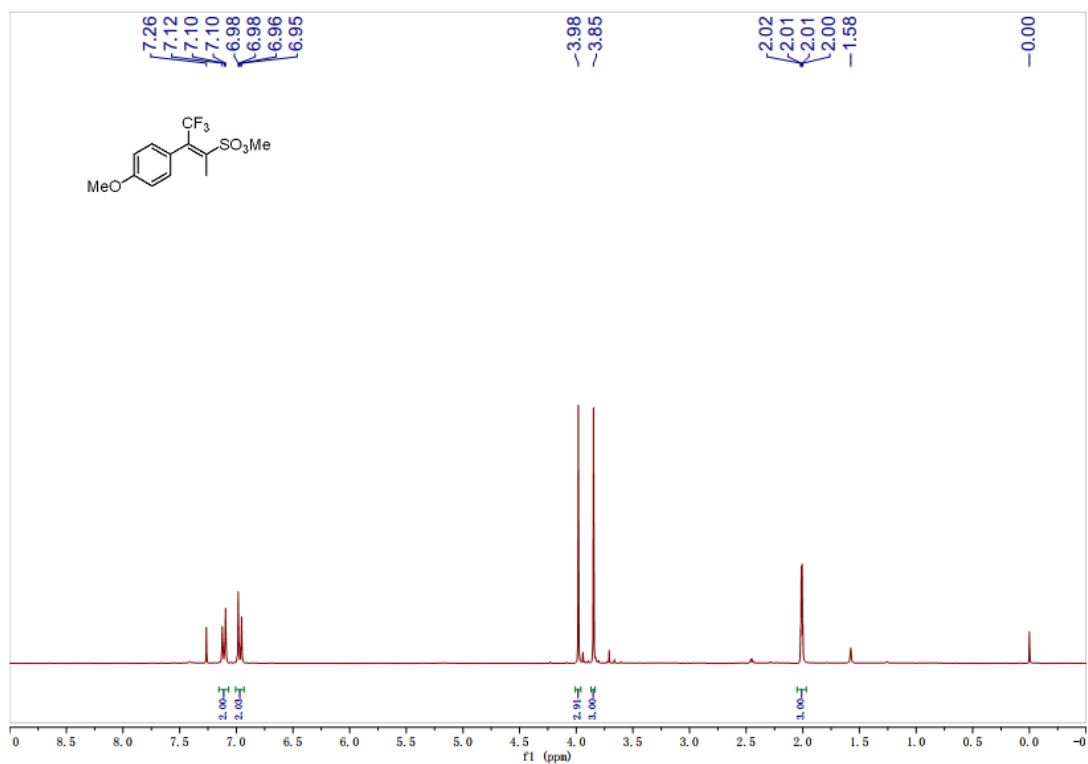



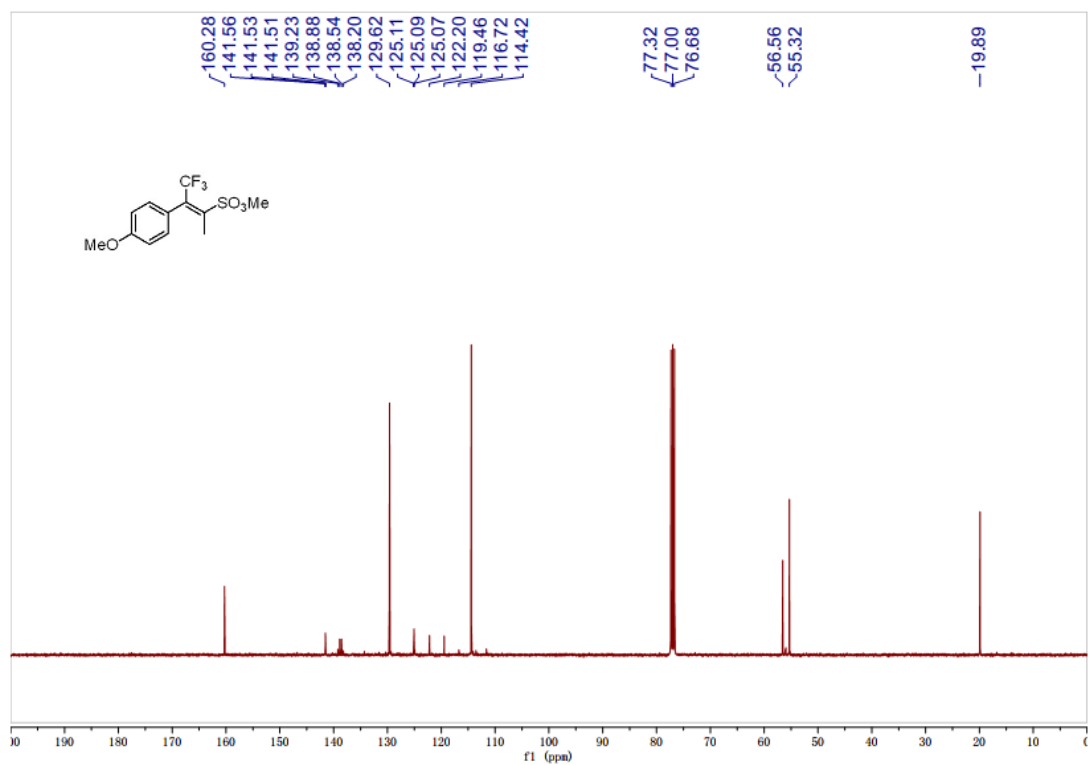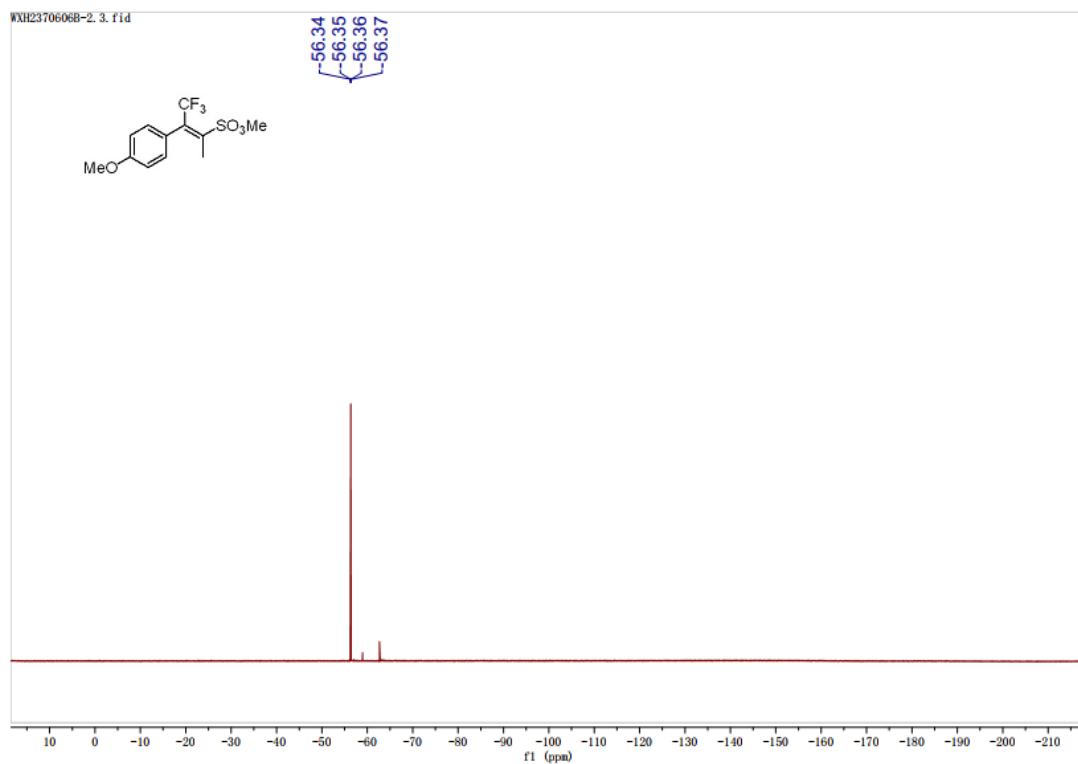

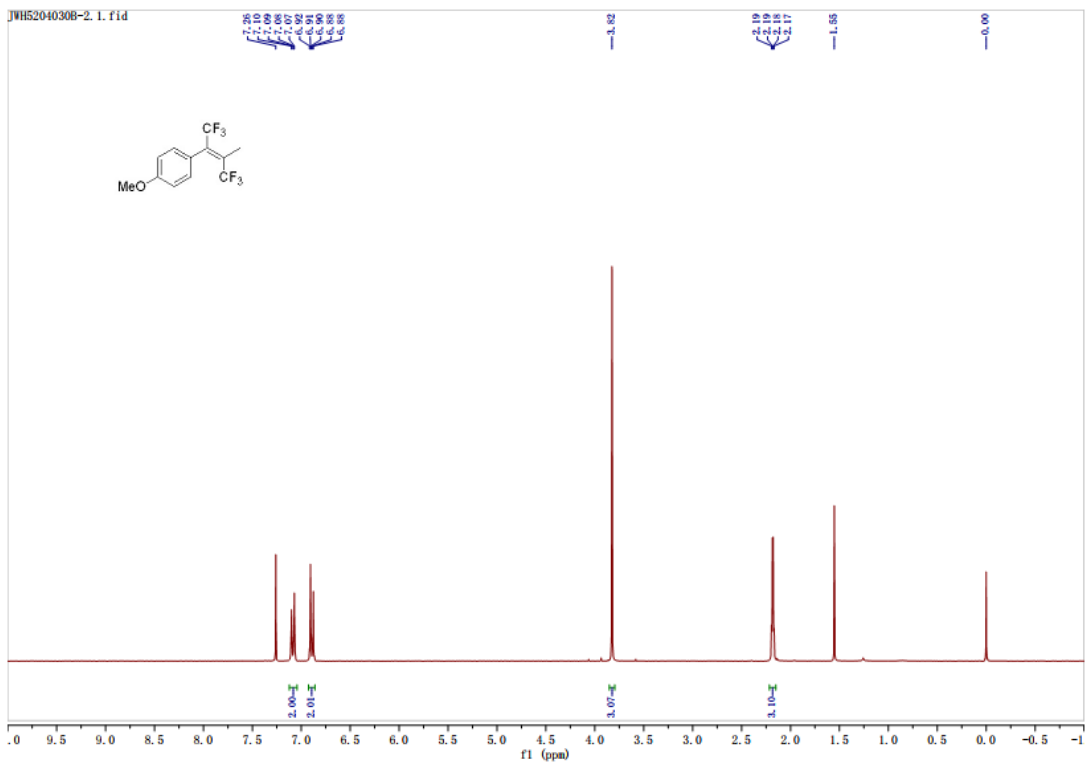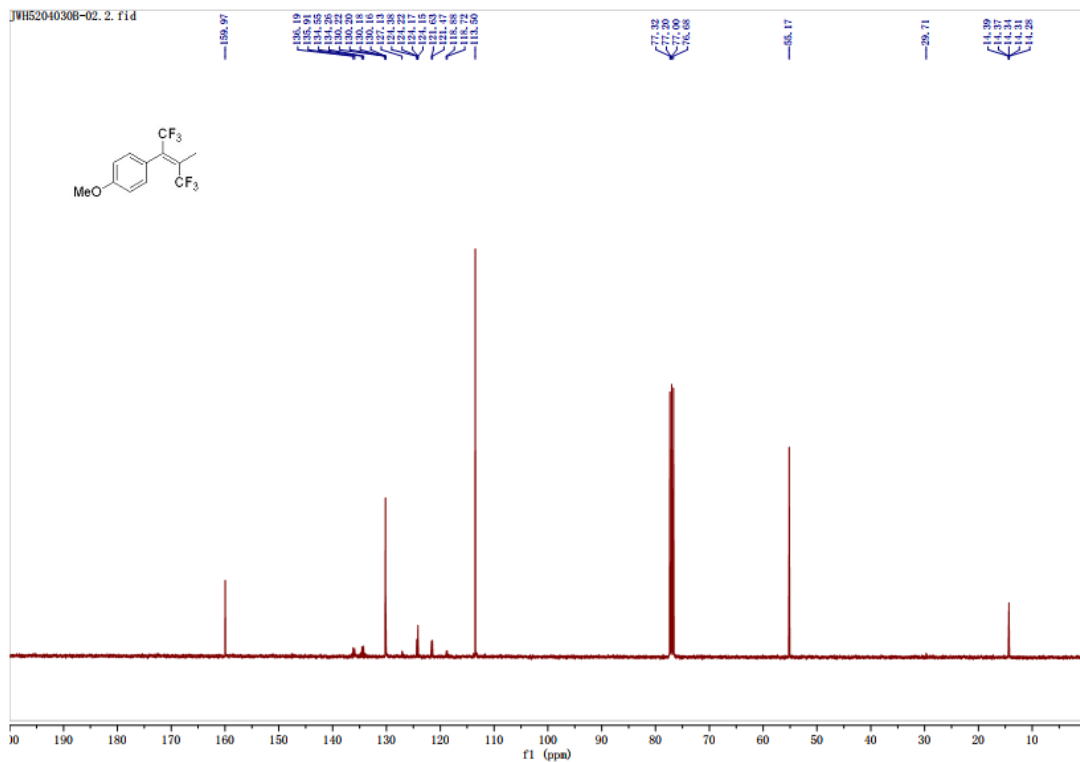

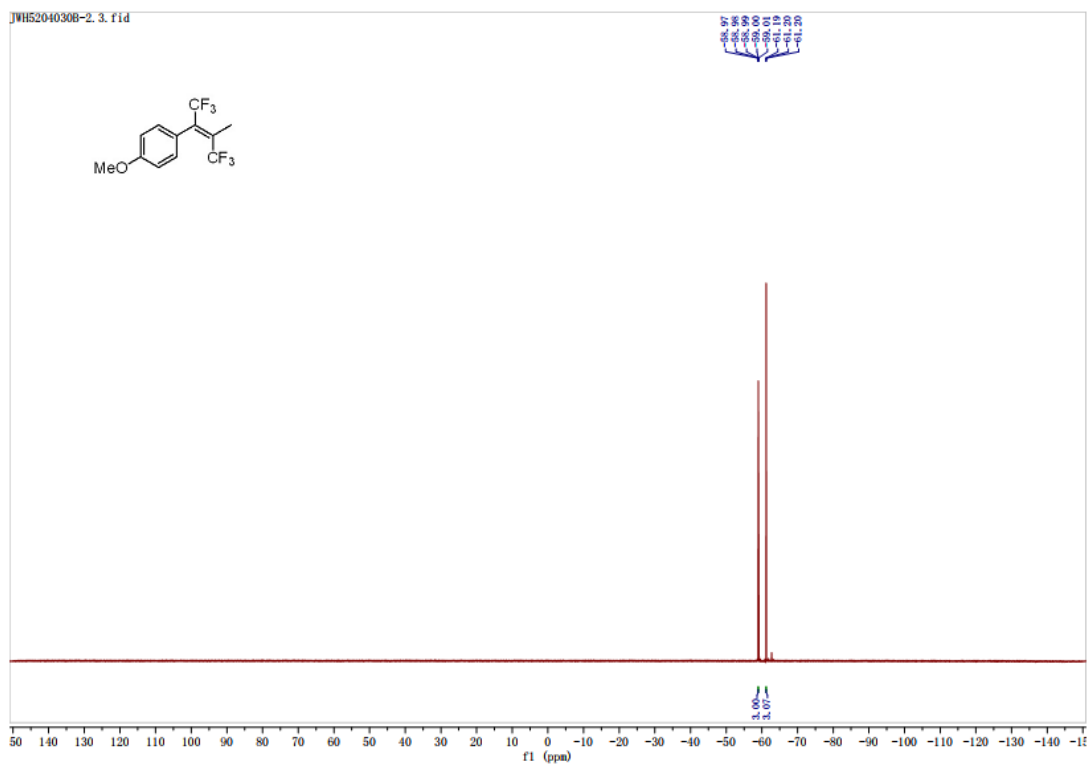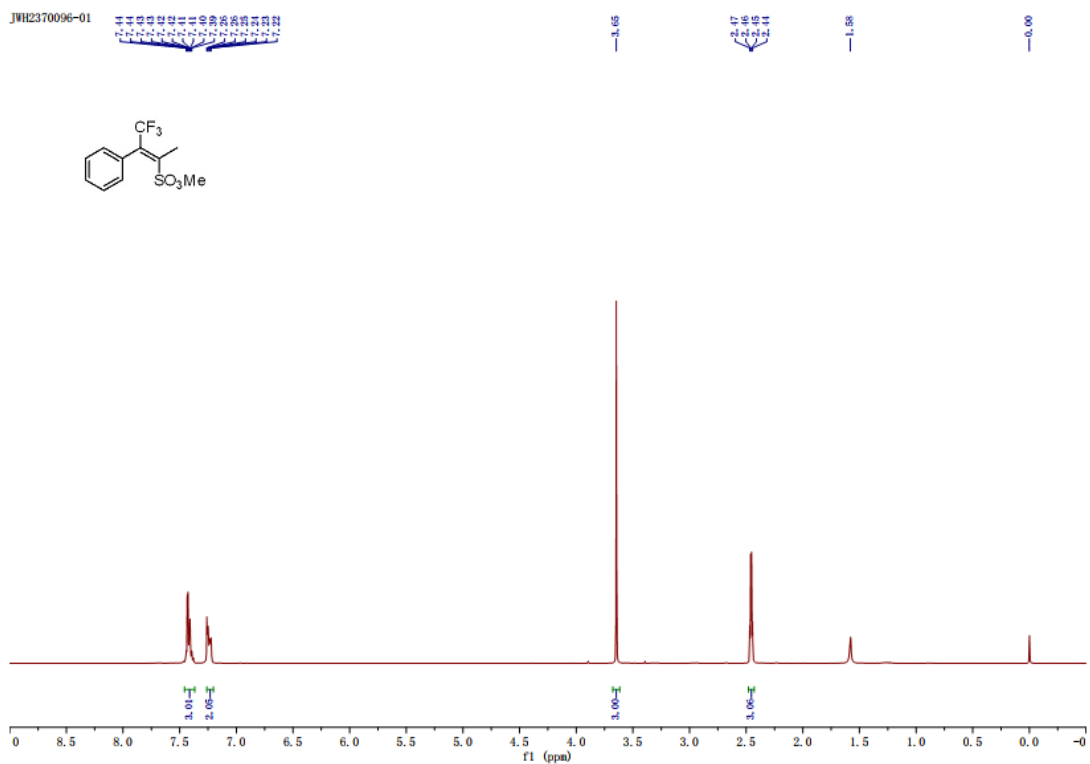

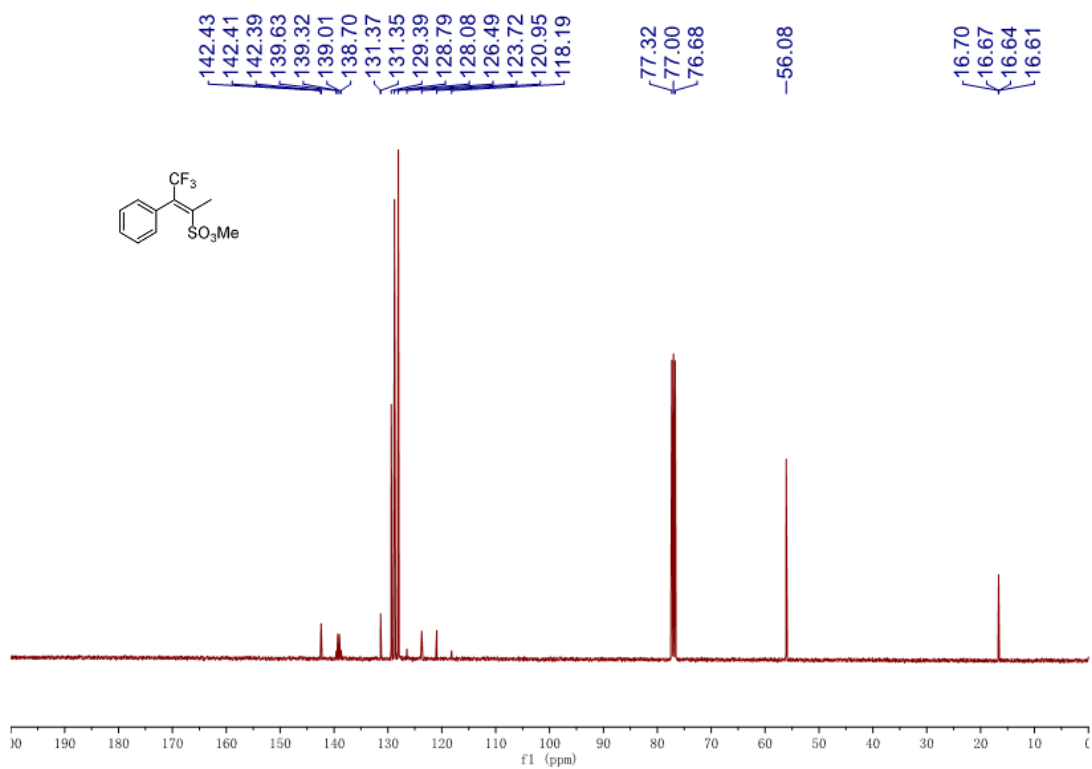

JWH2370096-01

16.64  
16.67  
16.70

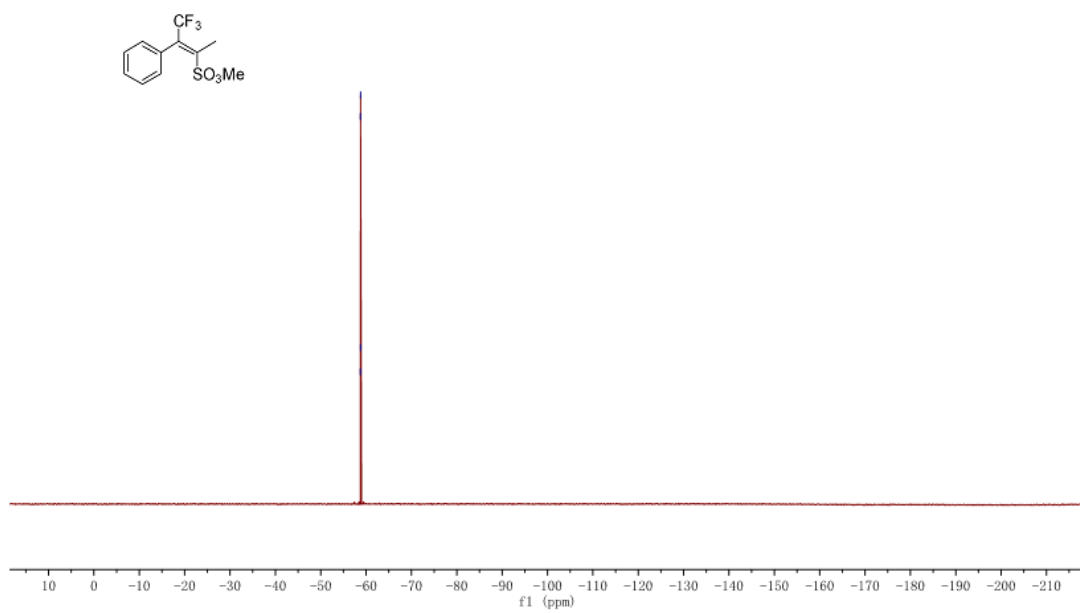

JWH2370504C-1

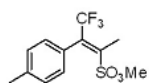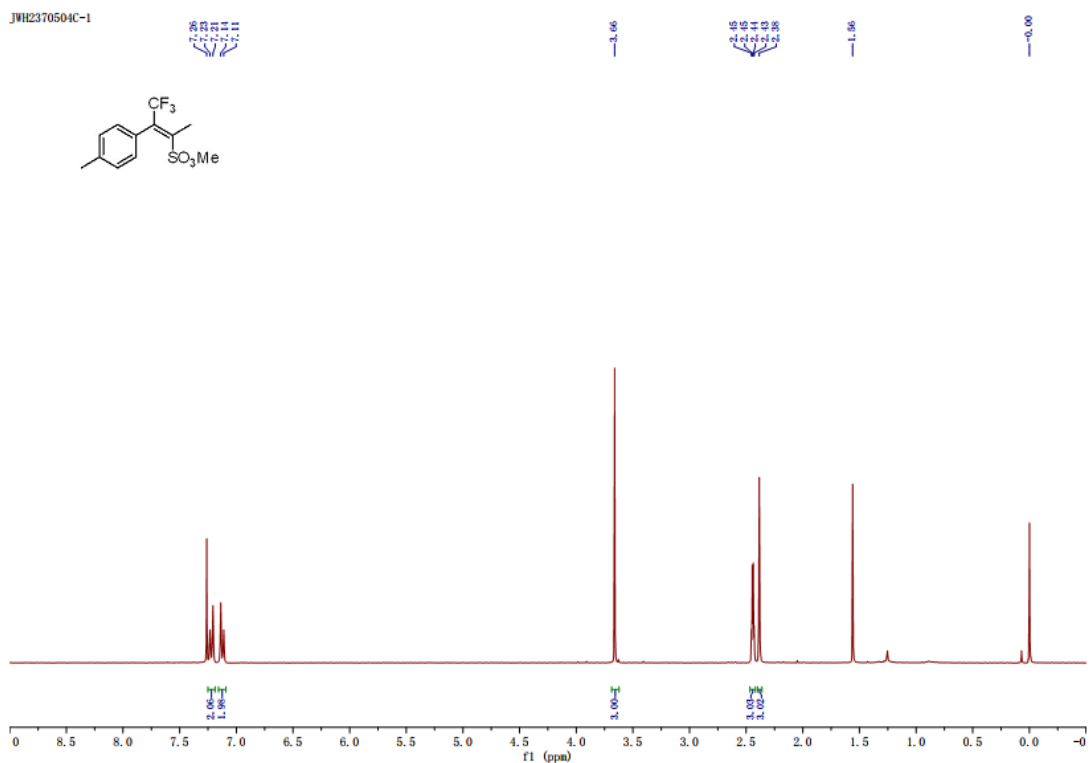

JWH2370504C-1. 2. fid

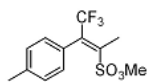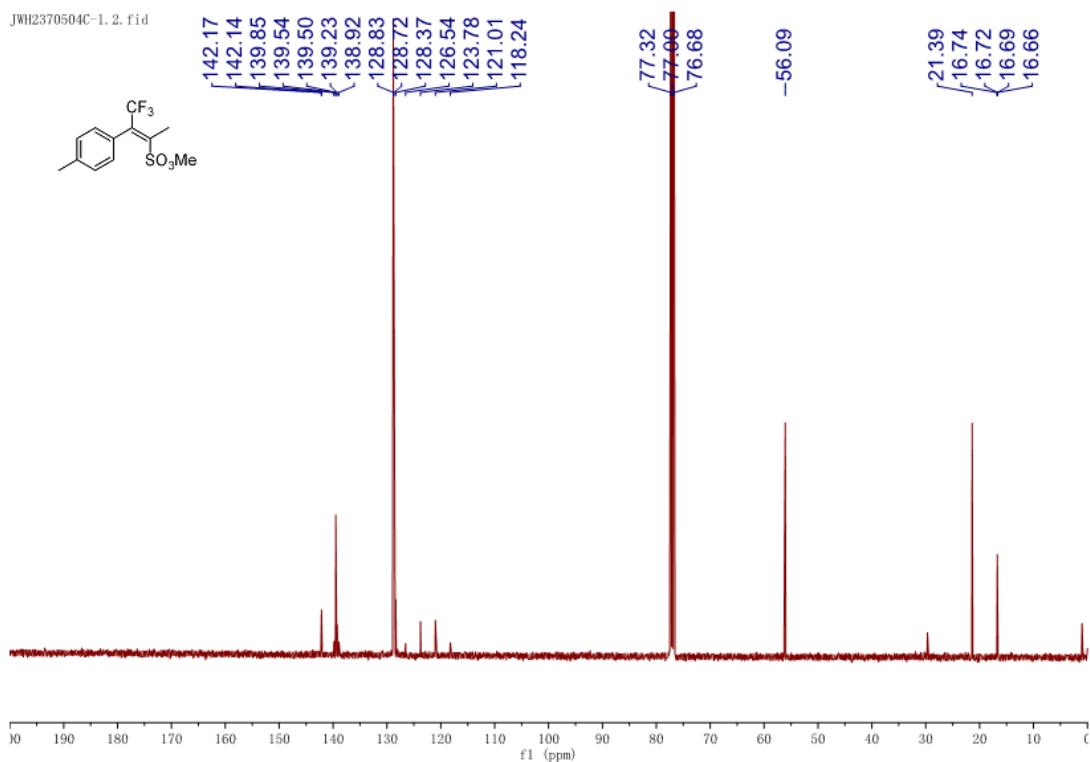

JWH2370504C-1

59.82  
59.81  
59.80  
59.79

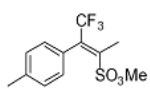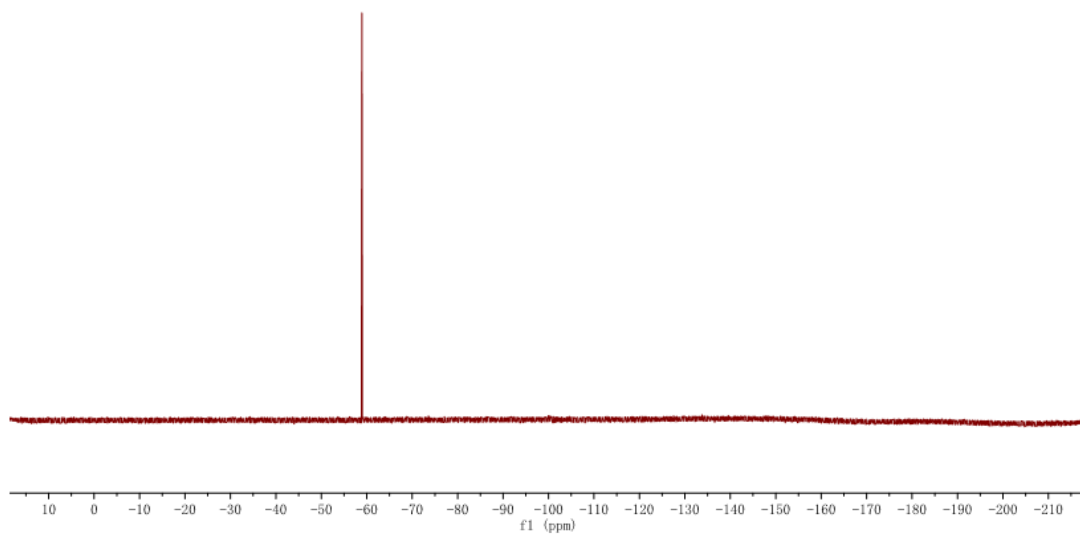

I2370501A-1

7.50  
7.49  
7.48  
7.47  
7.46

3.61

2.50  
2.49  
2.48  
2.47  
2.46

1.96

1.33

0.00

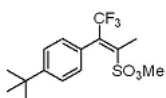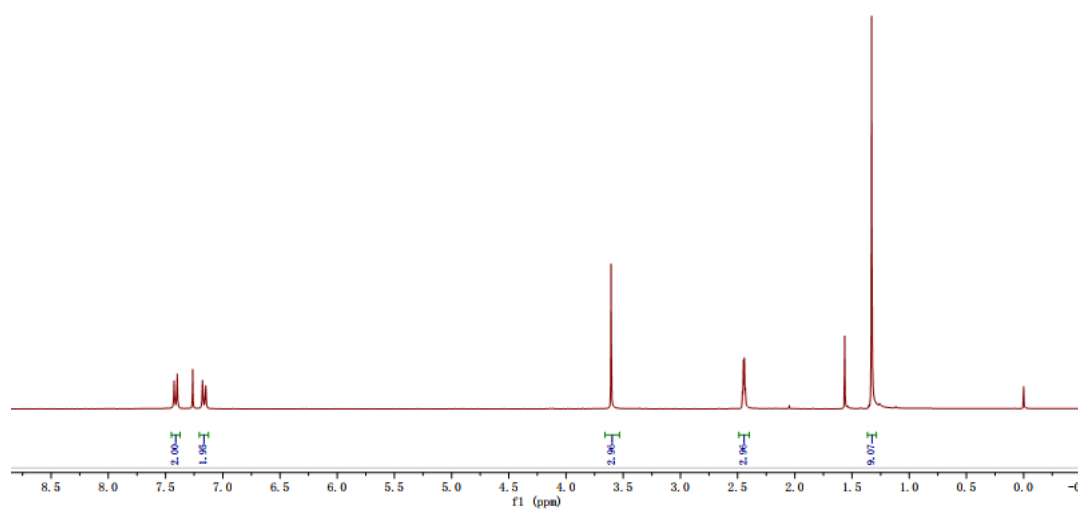

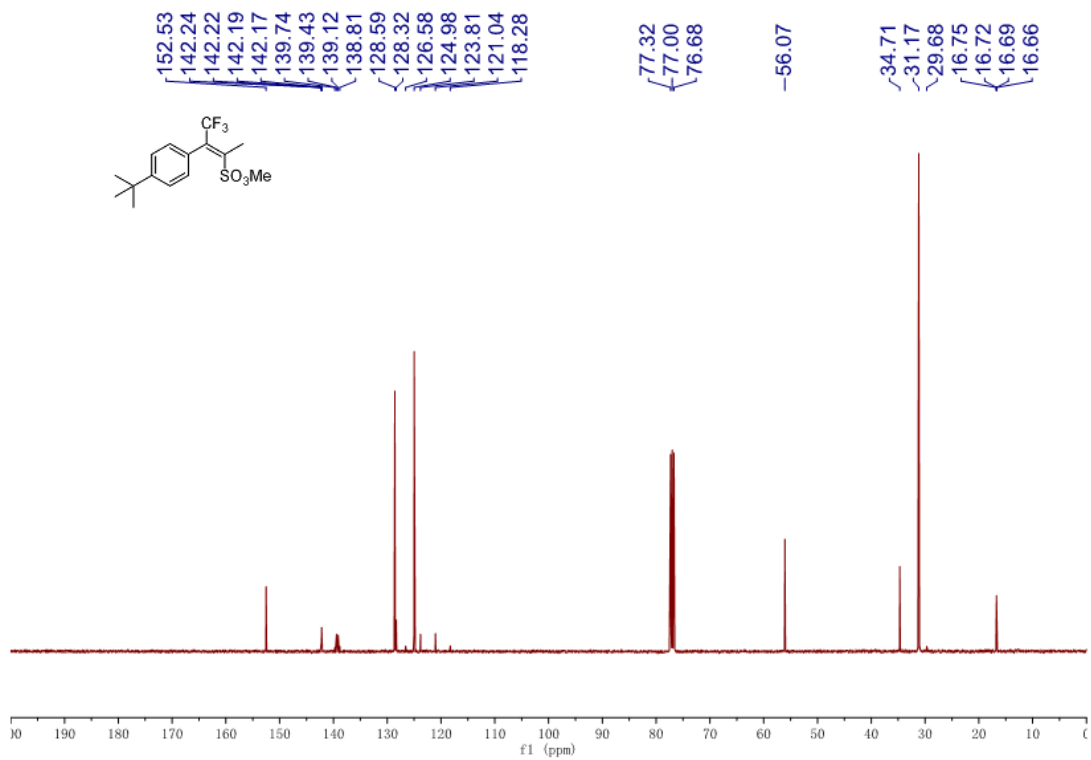

JWH2370501A-1

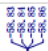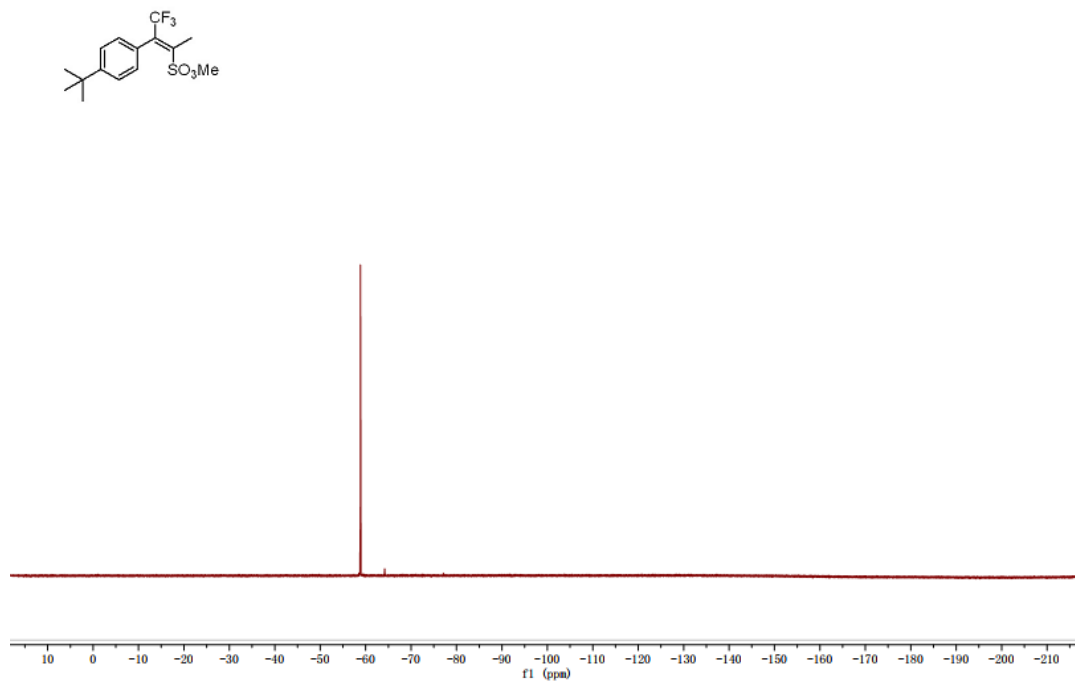

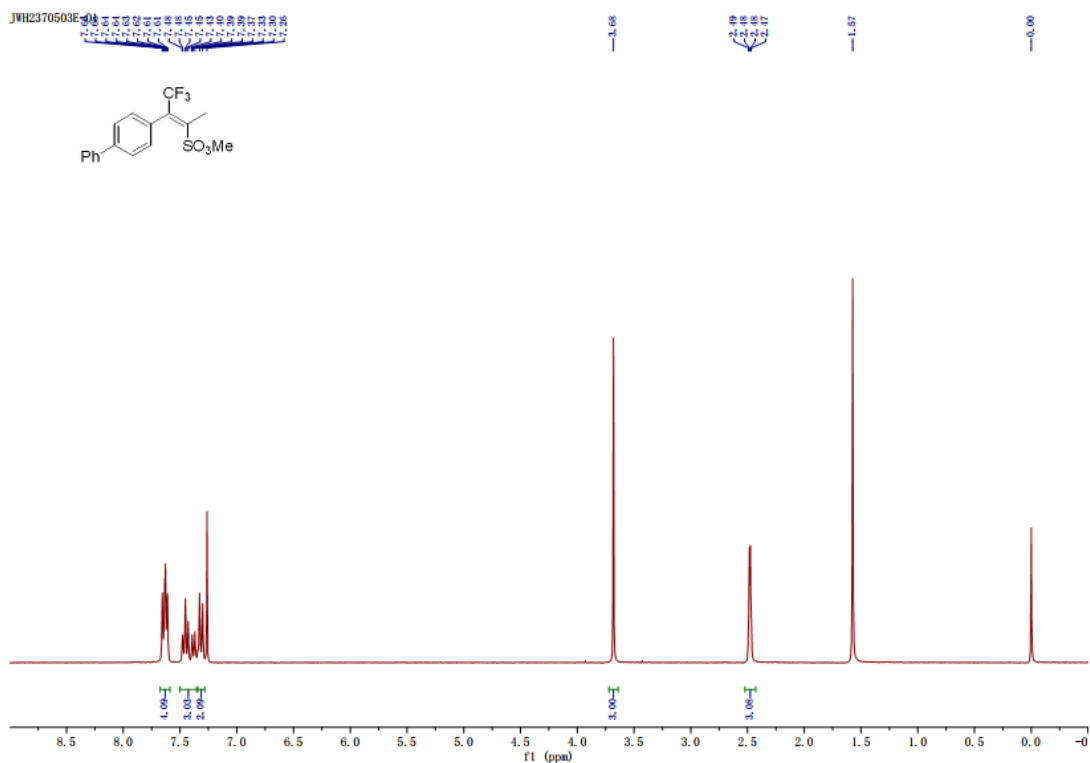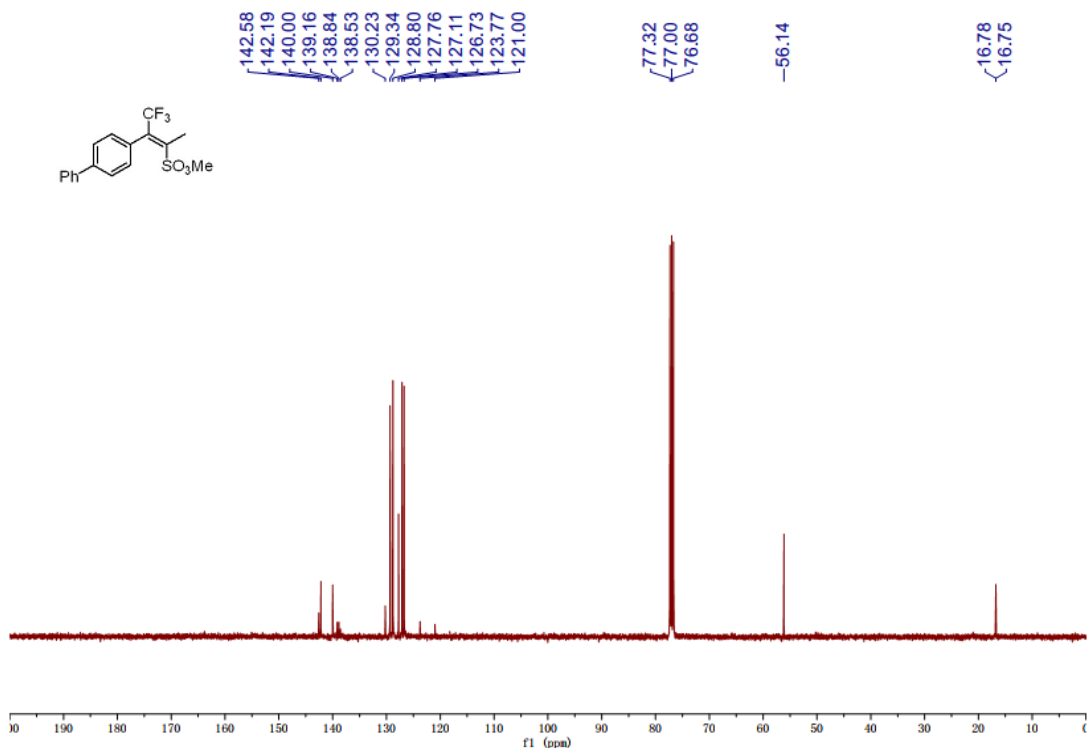



JWH2370503E-01

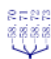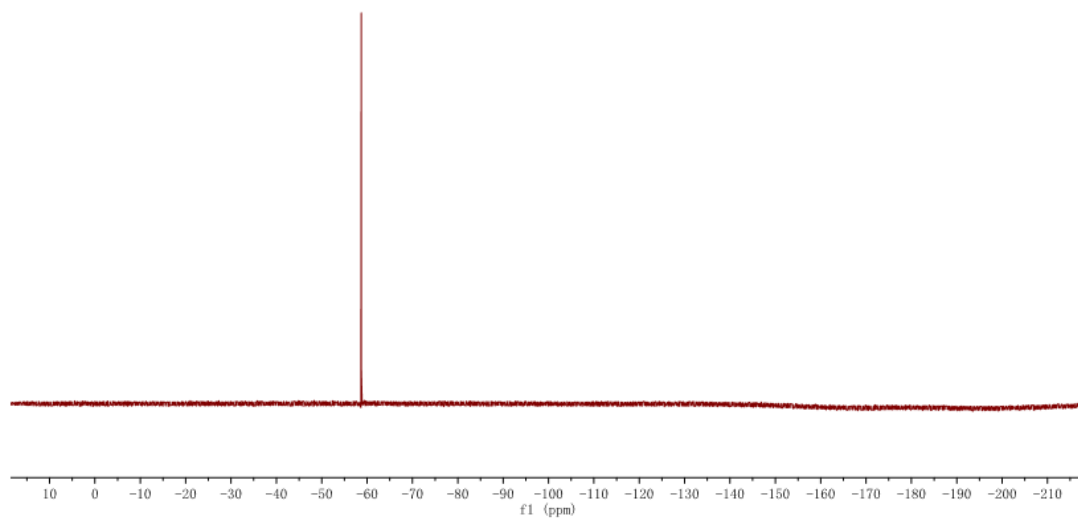

JWH2370501H-01

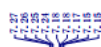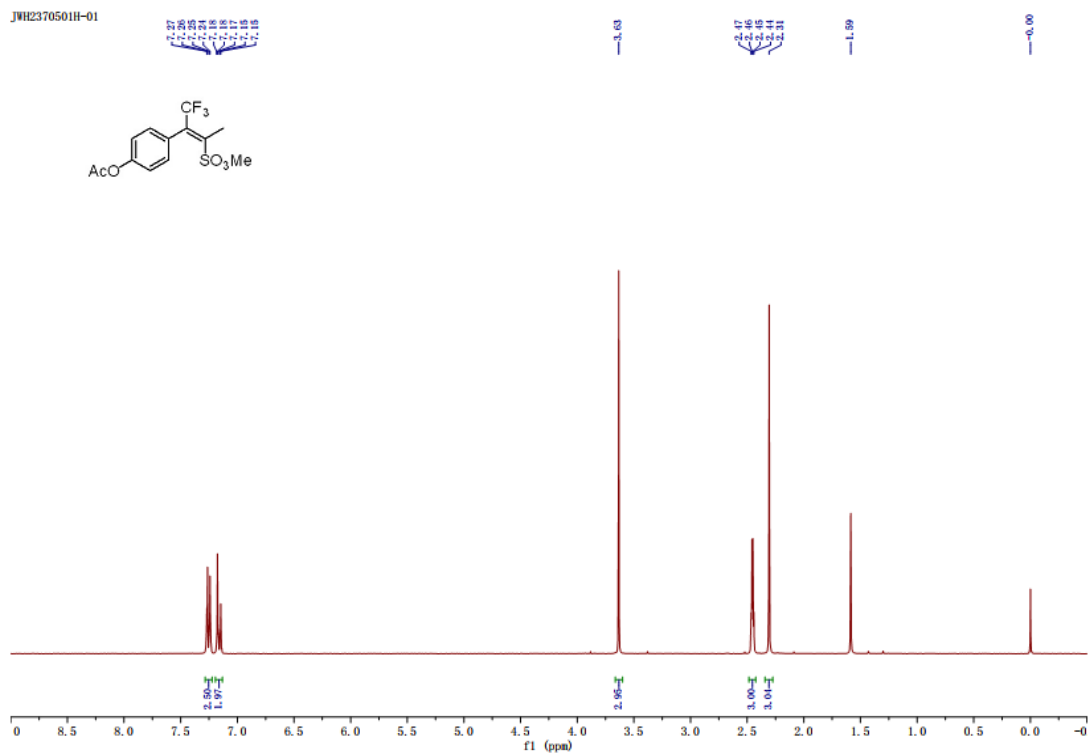

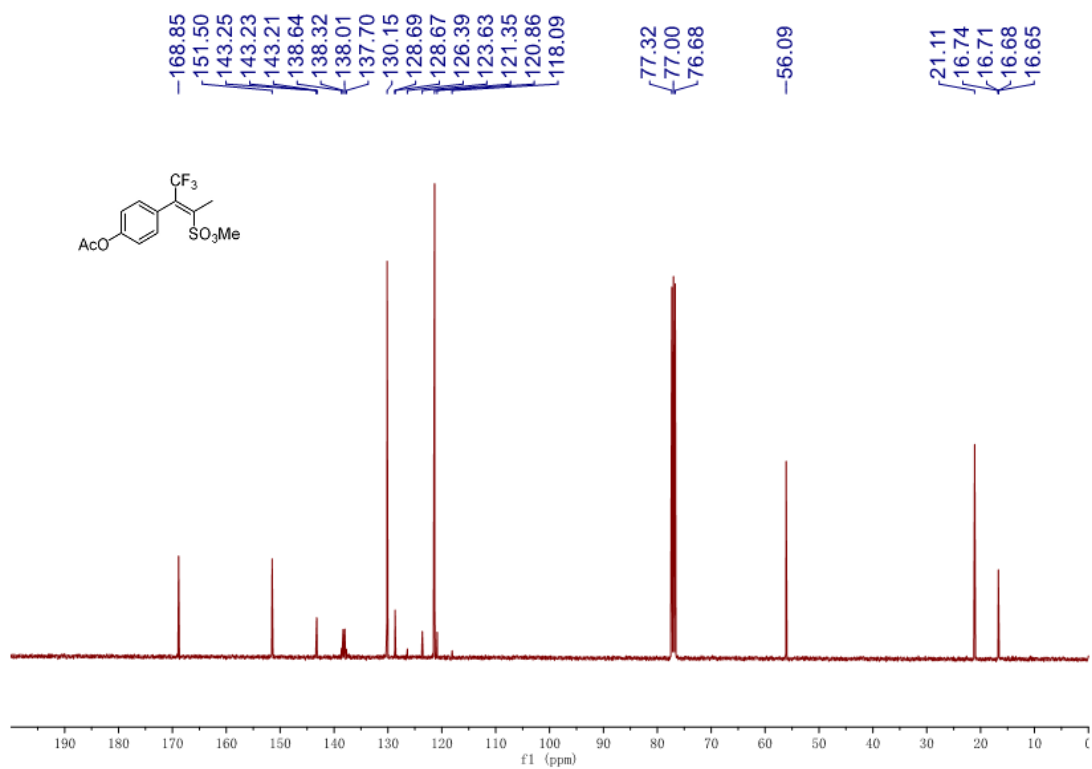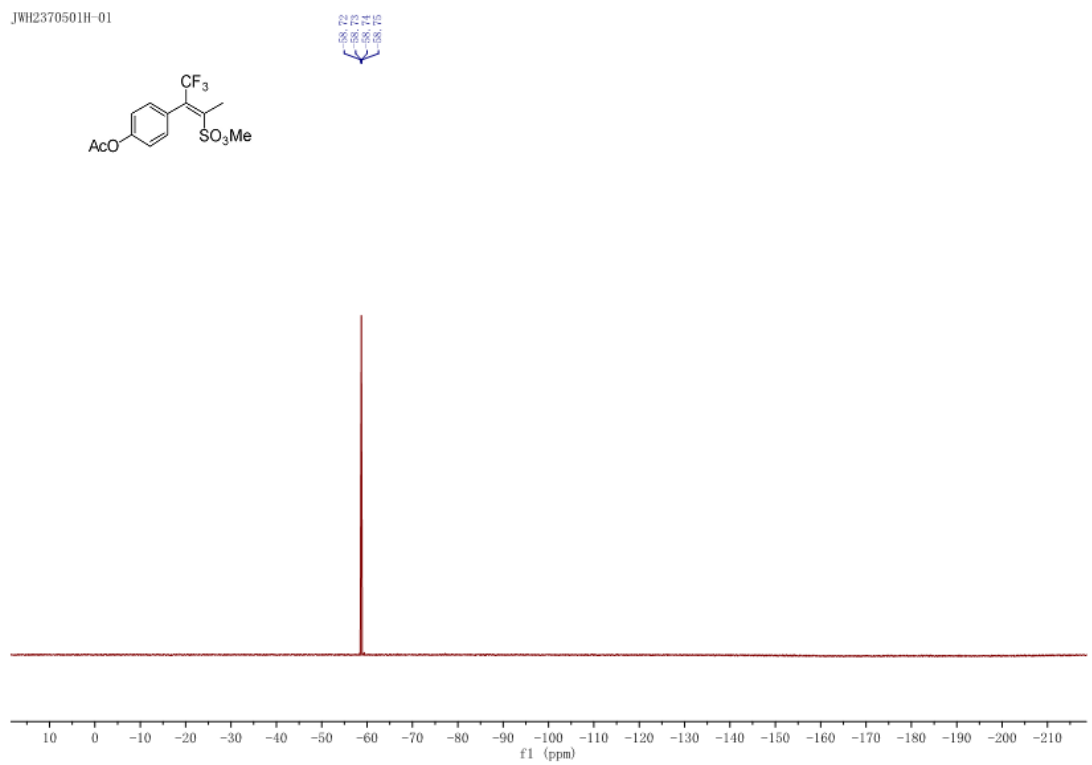

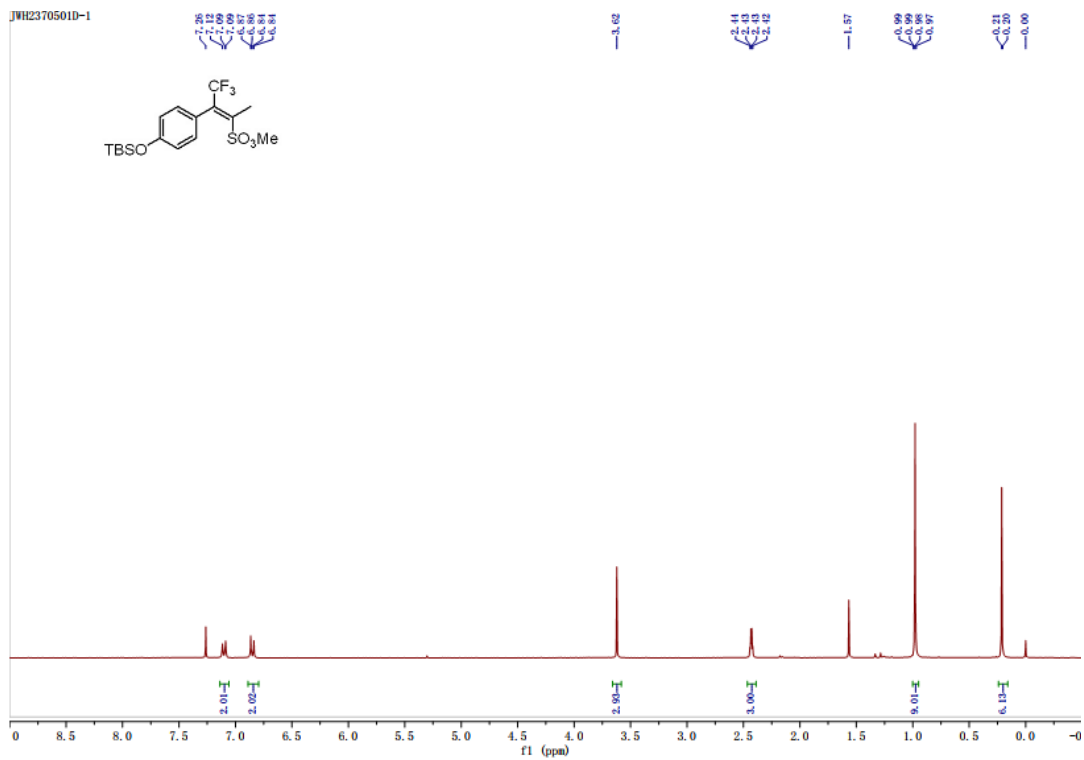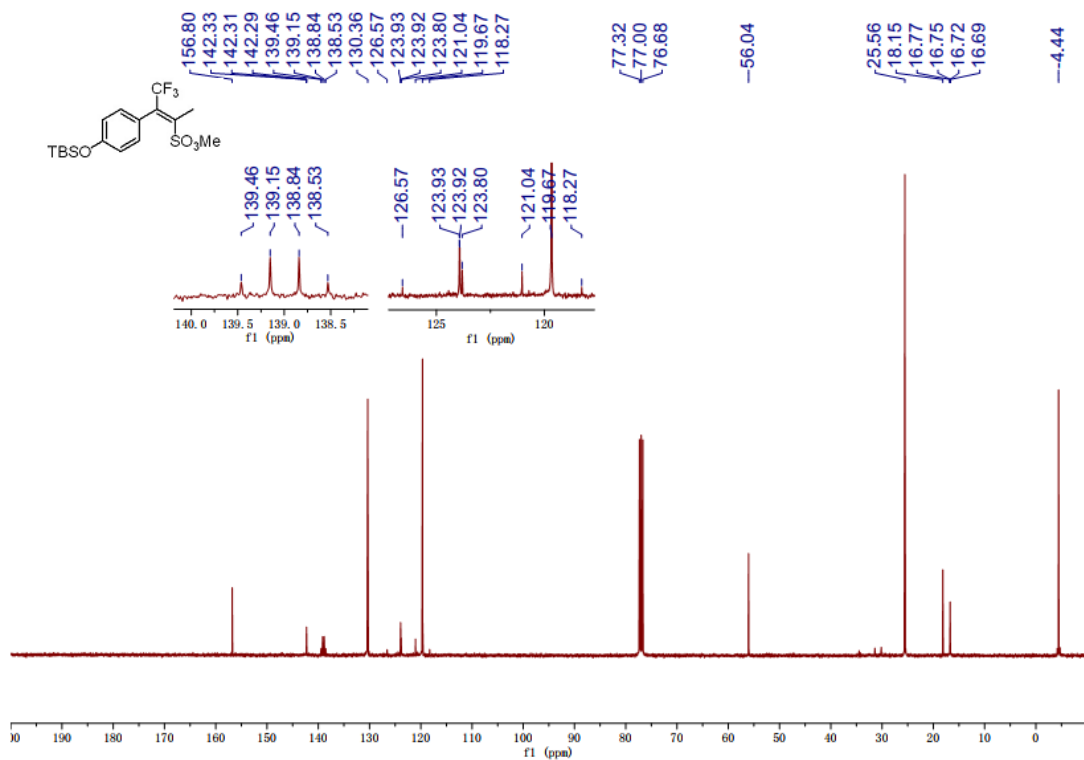

JWH2370501D-1

1.00  
0.99  
0.98  
0.97  
0.96  
0.95

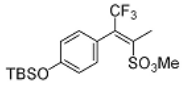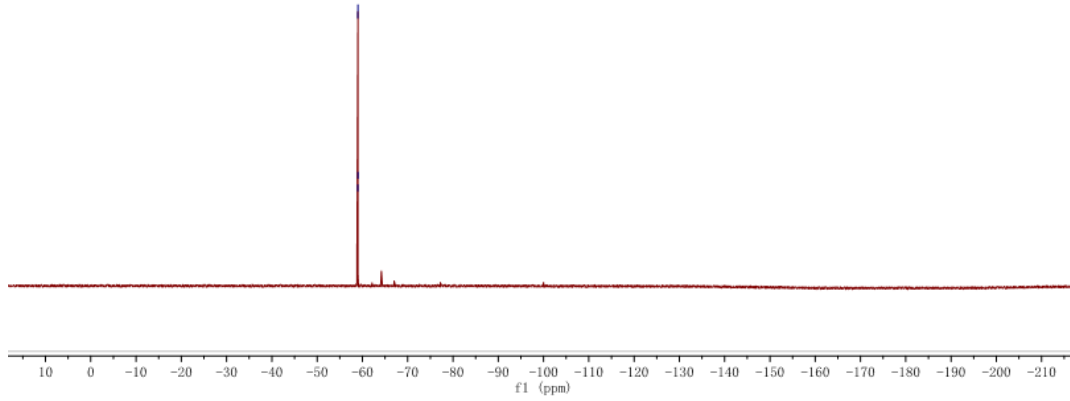

JWH2370501F-01

0.98  
0.97  
0.96  
0.95  
0.94  
0.93  
0.92  
0.91  
0.90  
0.89  
0.88  
0.87  
0.86  
0.85  
0.84  
0.83  
0.82  
0.81  
0.80  
0.79  
0.78  
0.77  
0.76  
0.75  
0.74  
0.73  
0.72  
0.71  
0.70  
0.69  
0.68  
0.67  
0.66  
0.65  
0.64  
0.63  
0.62  
0.61  
0.60  
0.59  
0.58  
0.57  
0.56  
0.55  
0.54  
0.53  
0.52  
0.51  
0.50  
0.49  
0.48  
0.47  
0.46  
0.45  
0.44  
0.43  
0.42  
0.41  
0.40  
0.39  
0.38  
0.37  
0.36  
0.35  
0.34  
0.33  
0.32  
0.31  
0.30  
0.29  
0.28  
0.27  
0.26  
0.25  
0.24  
0.23  
0.22  
0.21  
0.20  
0.19  
0.18  
0.17  
0.16  
0.15  
0.14  
0.13  
0.12  
0.11  
0.10  
0.09  
0.08  
0.07  
0.06  
0.05  
0.04  
0.03  
0.02  
0.01  
0.00

1.00

0.99

0.98

0.97

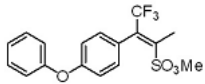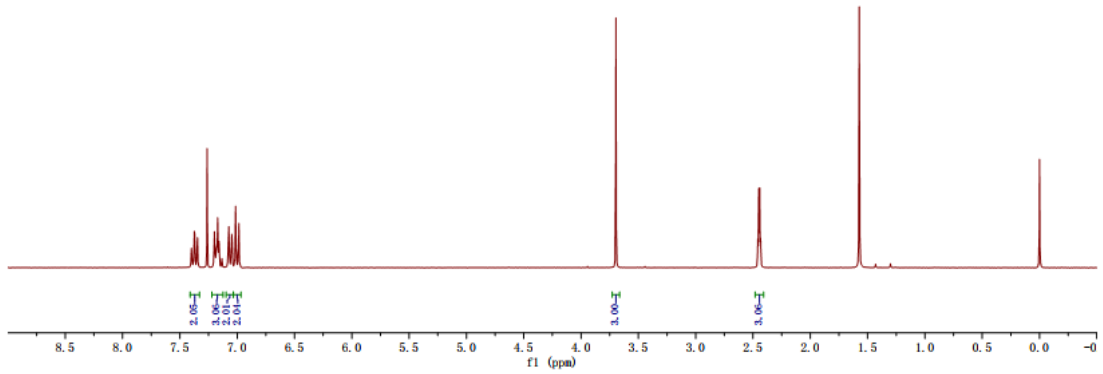

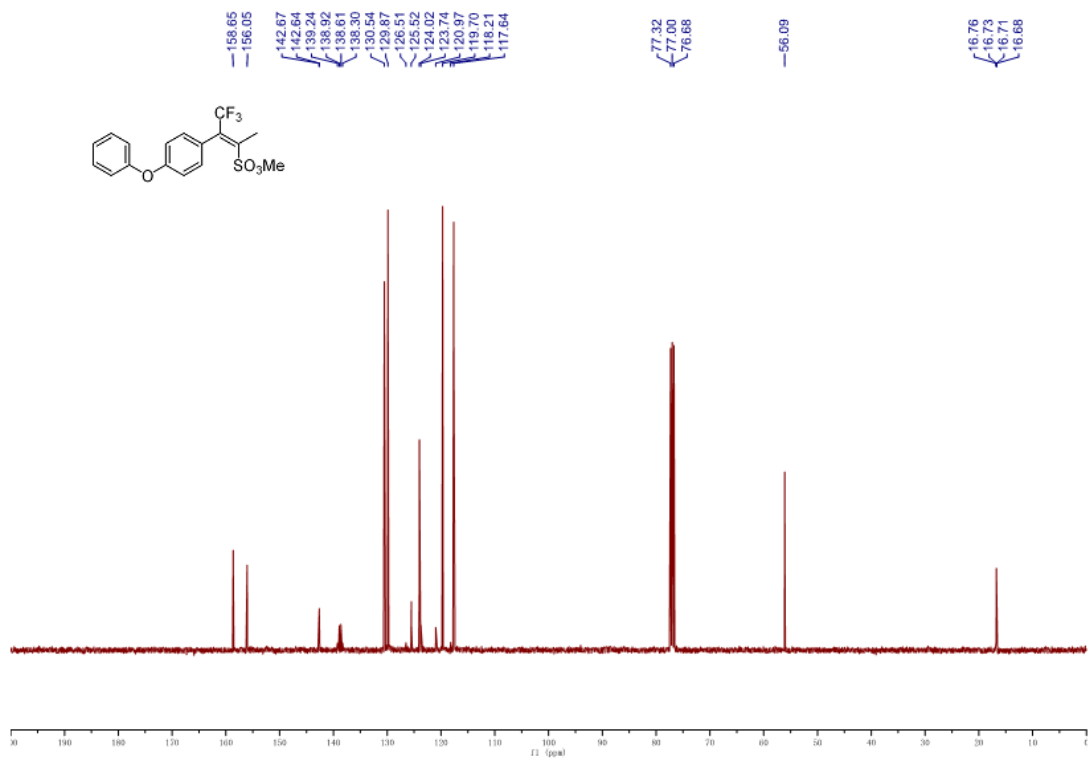

JWH2370501F-01

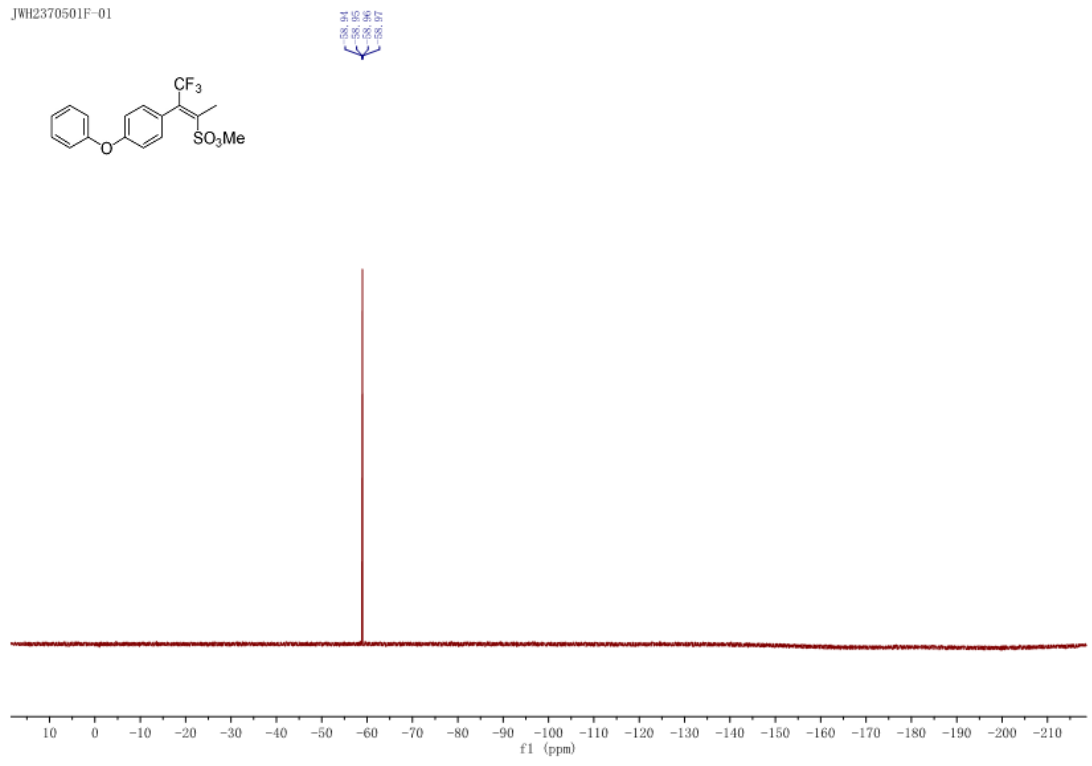

JWH2370505A-01

7.21  
7.13  
6.88  
6.83

5.20

3.67

2.43  
2.43  
2.42

1.62

0.00

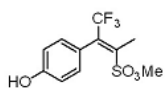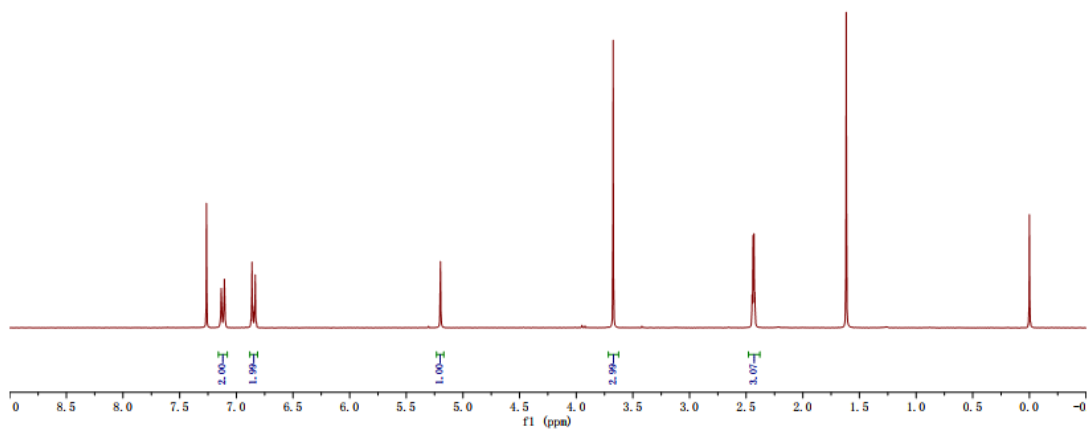

JWH2370505A-02, 2, 119

159.77

143.63

140.59

140.28

131.65

125.44

123.46

122.69

115.90

57.38

49.64

49.43

49.21

49.00

48.79

48.57

48.36

17.04

17.01

16.98

16.95

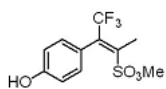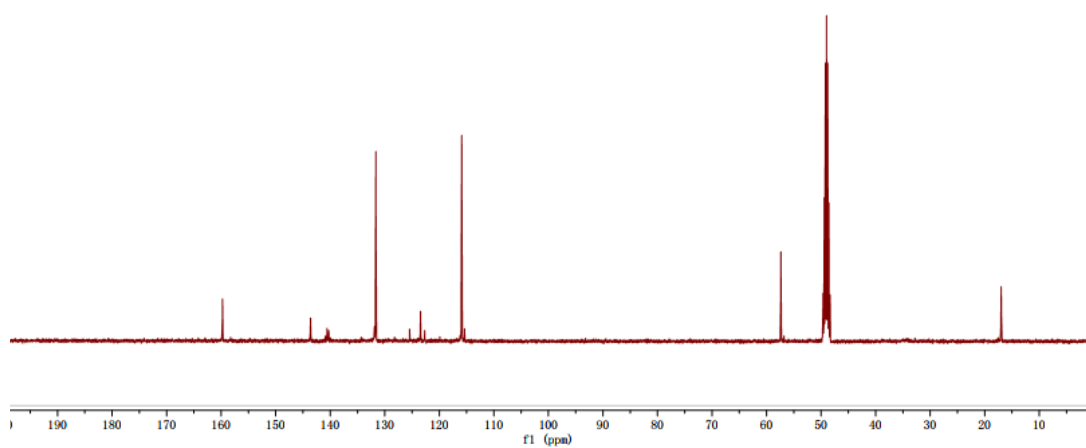

JWH2370505A-01

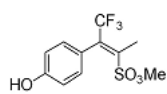

59.08  
59.09  
59.10  
59.11

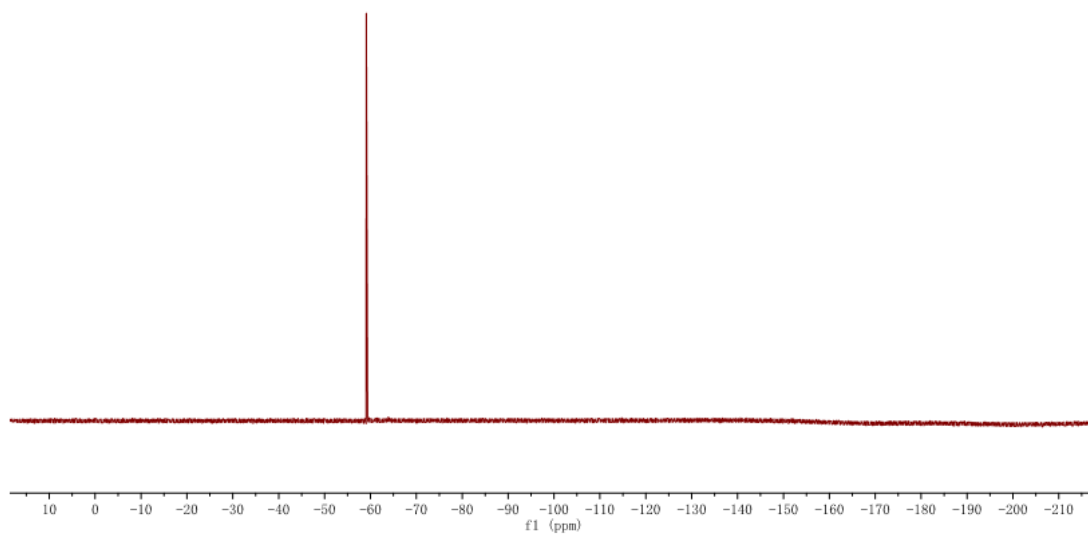

JWH2370517B-1

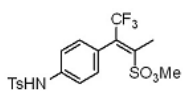

7.63  
7.60  
7.58  
7.21  
7.10  
6.96

3.61

2.43  
2.42  
2.41  
2.40

1.57

0.00

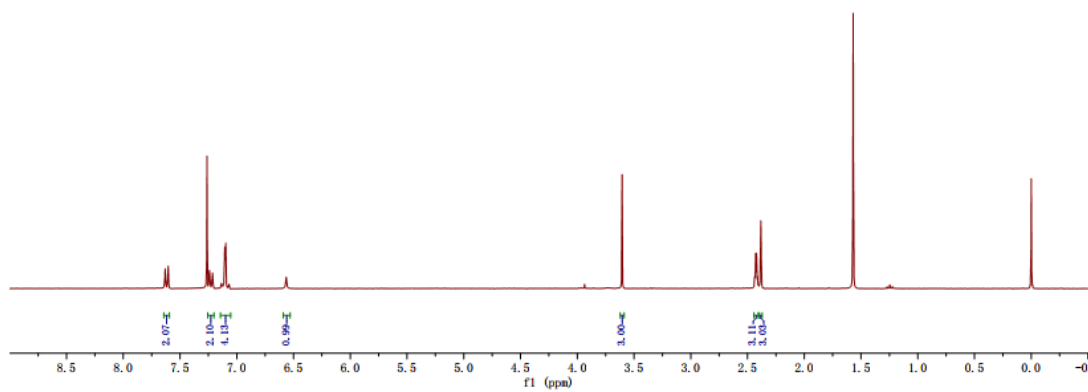

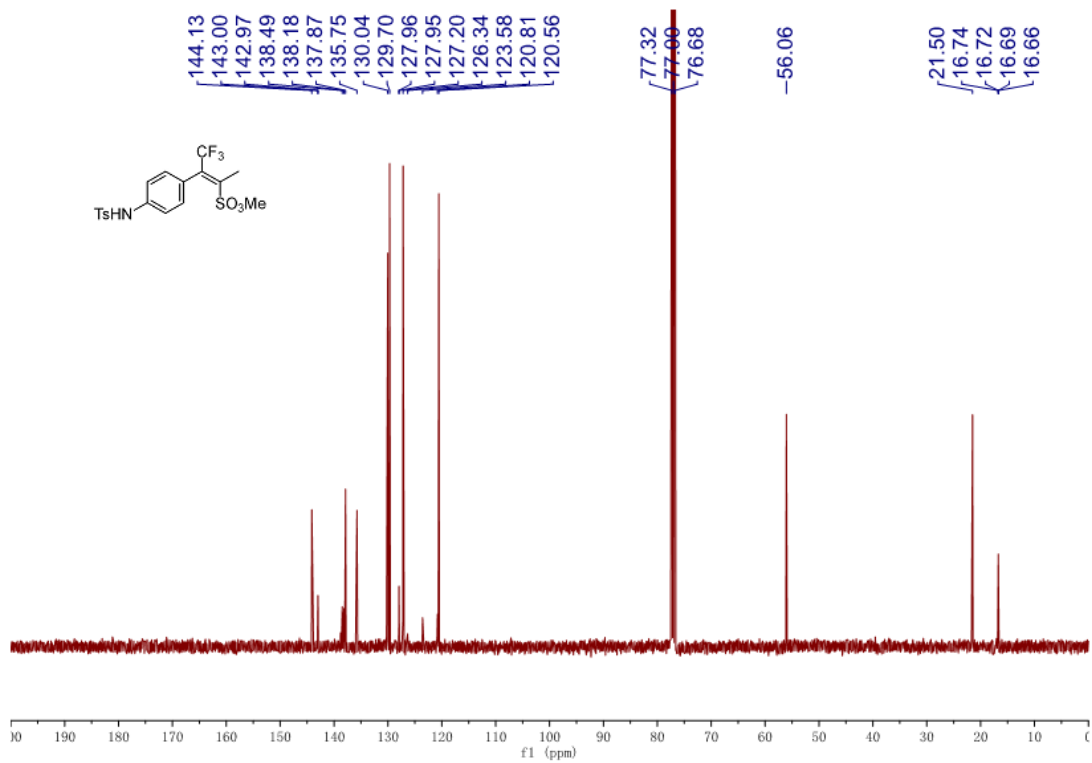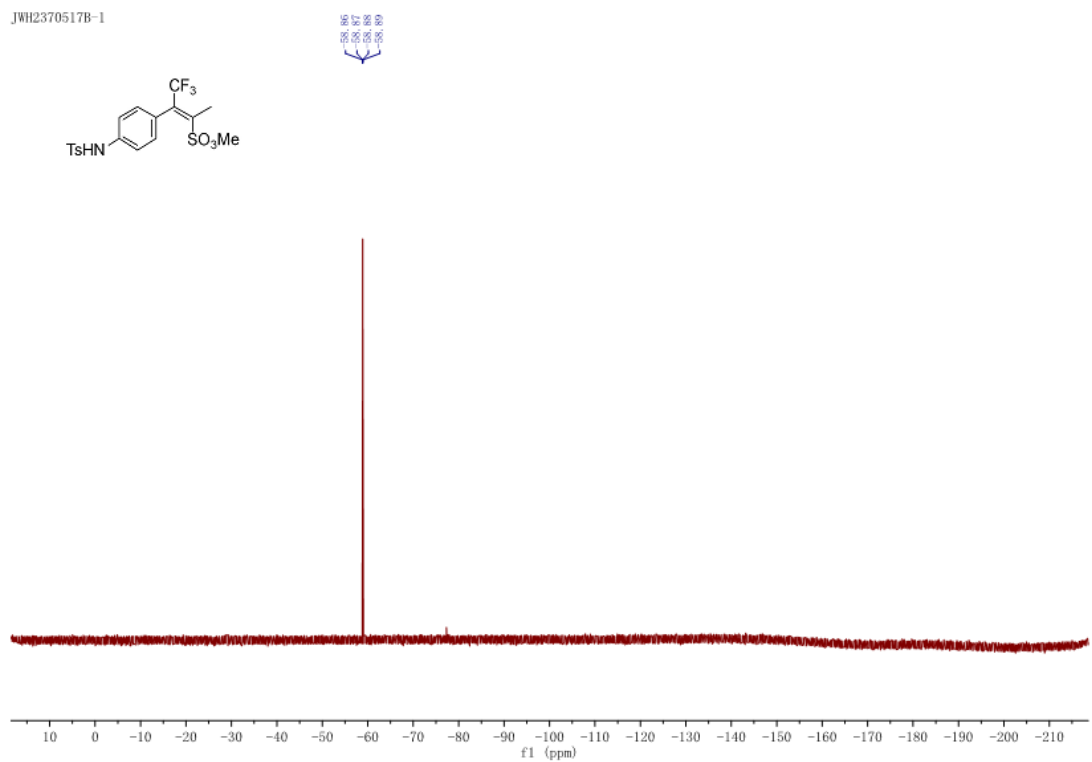



JWH2370503C-1

7.56  
7.54  
7.52  
7.50  
7.48  
7.46  
7.44  
7.42  
7.40  
7.38  
7.36  
7.34  
7.32  
7.30  
7.28  
7.26  
7.24  
7.22  
7.20  
7.18  
7.16  
7.14  
7.12  
7.10  
7.08  
7.06  
7.04  
7.02  
7.00  
6.98  
6.96  
6.94  
6.92  
6.90  
6.88  
6.86  
6.84  
6.82  
6.80  
6.78  
6.76  
6.74  
6.72  
6.70  
6.68  
6.66  
6.64  
6.62  
6.60  
6.58  
6.56  
6.54  
6.52  
6.50  
6.48  
6.46  
6.44  
6.42  
6.40  
6.38  
6.36  
6.34  
6.32  
6.30  
6.28  
6.26  
6.24  
6.22  
6.20  
6.18  
6.16  
6.14  
6.12  
6.10  
6.08  
6.06  
6.04  
6.02  
6.00  
5.98  
5.96  
5.94  
5.92  
5.90  
5.88  
5.86  
5.84  
5.82  
5.80  
5.78  
5.76  
5.74  
5.72  
5.70  
5.68  
5.66  
5.64  
5.62  
5.60  
5.58  
5.56  
5.54  
5.52  
5.50  
5.48  
5.46  
5.44  
5.42  
5.40  
5.38  
5.36  
5.34  
5.32  
5.30  
5.28  
5.26  
5.24  
5.22  
5.20  
5.18  
5.16  
5.14  
5.12  
5.10  
5.08  
5.06  
5.04  
5.02  
5.00  
4.98  
4.96  
4.94  
4.92  
4.90  
4.88  
4.86  
4.84  
4.82  
4.80  
4.78  
4.76  
4.74  
4.72  
4.70  
4.68  
4.66  
4.64  
4.62  
4.60  
4.58  
4.56  
4.54  
4.52  
4.50  
4.48  
4.46  
4.44  
4.42  
4.40  
4.38  
4.36  
4.34  
4.32  
4.30  
4.28  
4.26  
4.24  
4.22  
4.20  
4.18  
4.16  
4.14  
4.12  
4.10  
4.08  
4.06  
4.04  
4.02  
4.00  
3.98  
3.96  
3.94  
3.92  
3.90  
3.88  
3.86  
3.84  
3.82  
3.80  
3.78  
3.76  
3.74  
3.72  
3.70  
3.68  
3.66  
3.64  
3.62  
3.60  
3.58  
3.56  
3.54  
3.52  
3.50  
3.48  
3.46  
3.44  
3.42  
3.40  
3.38  
3.36  
3.34  
3.32  
3.30  
3.28  
3.26  
3.24  
3.22  
3.20  
3.18  
3.16  
3.14  
3.12  
3.10  
3.08  
3.06  
3.04  
3.02  
3.00  
2.98  
2.96  
2.94  
2.92  
2.90  
2.88  
2.86  
2.84  
2.82  
2.80  
2.78  
2.76  
2.74  
2.72  
2.70  
2.68  
2.66  
2.64  
2.62  
2.60  
2.58  
2.56  
2.54  
2.52  
2.50  
2.48  
2.46  
2.44  
2.42  
2.40  
2.38  
2.36  
2.34  
2.32  
2.30  
2.28  
2.26  
2.24  
2.22  
2.20  
2.18  
2.16  
2.14  
2.12  
2.10  
2.08  
2.06  
2.04  
2.02  
2.00  
1.98  
1.96  
1.94  
1.92  
1.90  
1.88  
1.86  
1.84  
1.82  
1.80  
1.78  
1.76  
1.74  
1.72  
1.70  
1.68  
1.66  
1.64  
1.62  
1.60  
1.58  
1.56  
1.54  
1.52  
1.50  
1.48  
1.46  
1.44  
1.42  
1.40  
1.38  
1.36  
1.34  
1.32  
1.30  
1.28  
1.26  
1.24  
1.22  
1.20  
1.18  
1.16  
1.14  
1.12  
1.10  
1.08  
1.06  
1.04  
1.02  
1.00  
0.98  
0.96  
0.94  
0.92  
0.90  
0.88  
0.86  
0.84  
0.82  
0.80  
0.78  
0.76  
0.74  
0.72  
0.70  
0.68  
0.66  
0.64  
0.62  
0.60  
0.58  
0.56  
0.54  
0.52  
0.50  
0.48  
0.46  
0.44  
0.42  
0.40  
0.38  
0.36  
0.34  
0.32  
0.30  
0.28  
0.26  
0.24  
0.22  
0.20  
0.18  
0.16  
0.14  
0.12  
0.10  
0.08  
0.06  
0.04  
0.02  
0.00

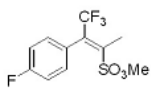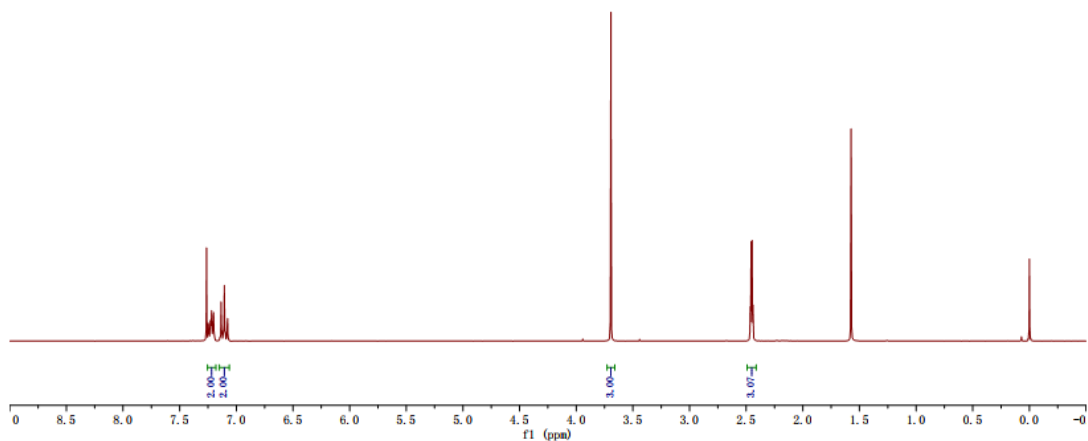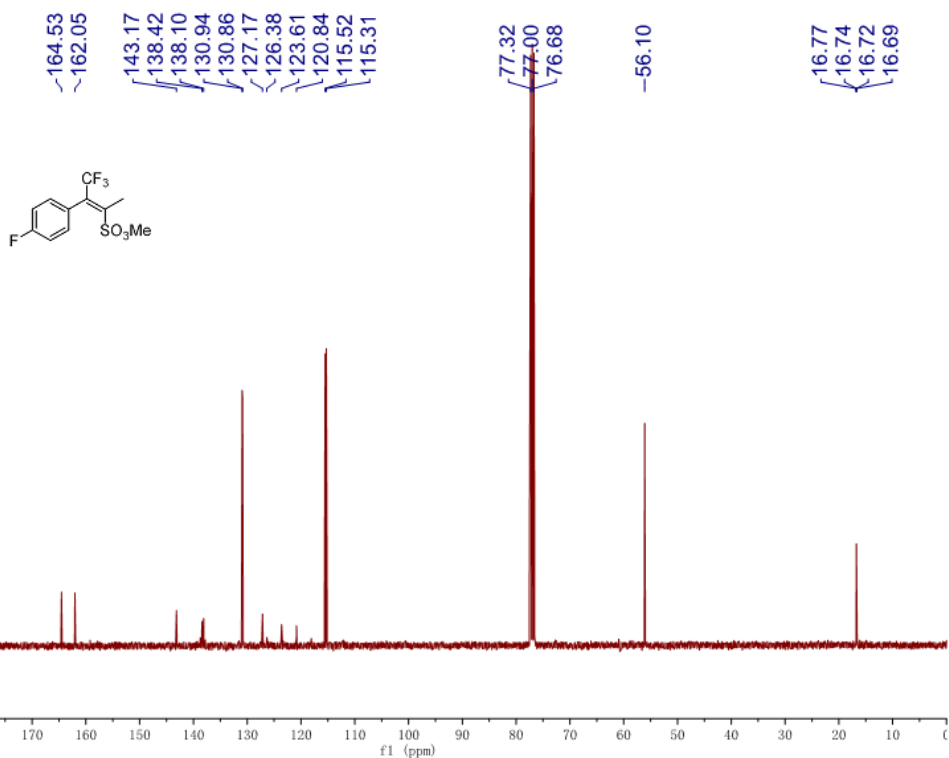

JWH2370503C-1

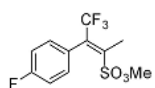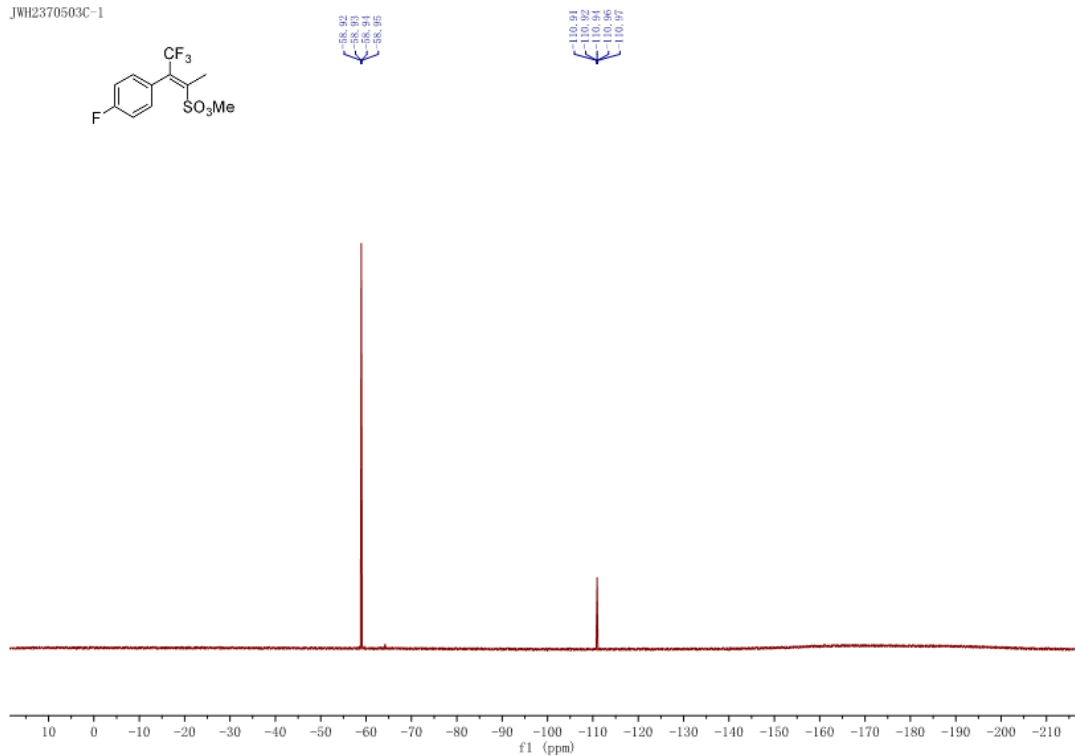

JWH2370503B-01

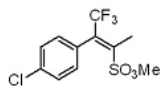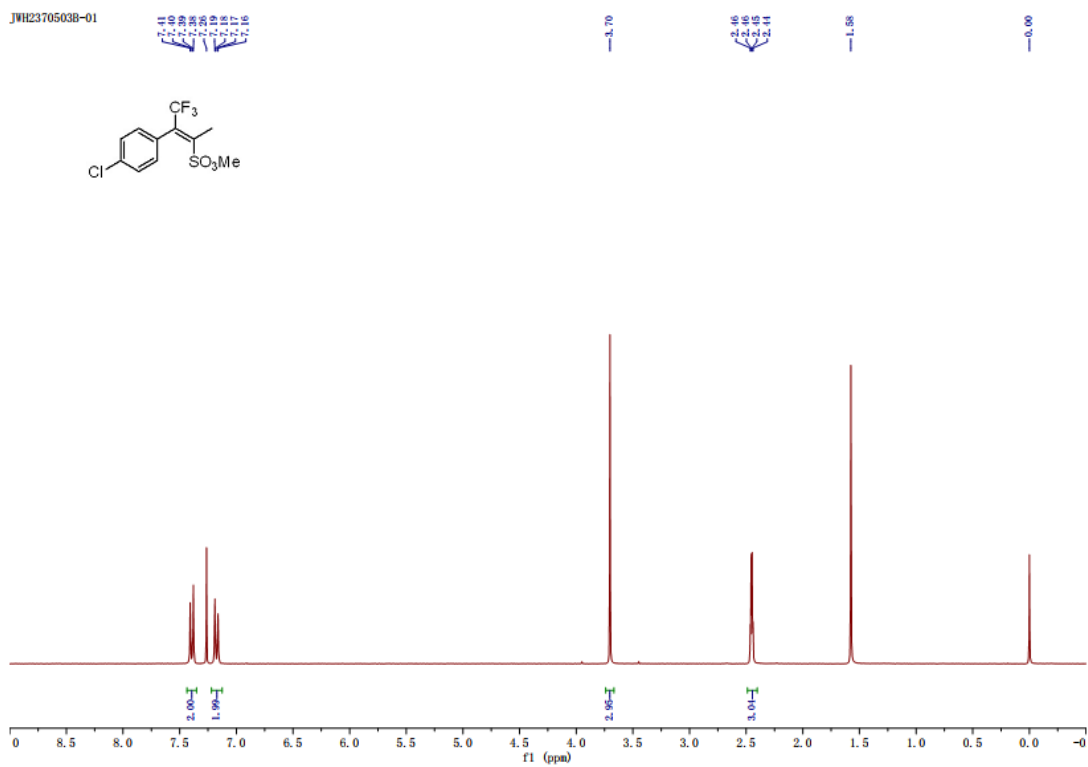

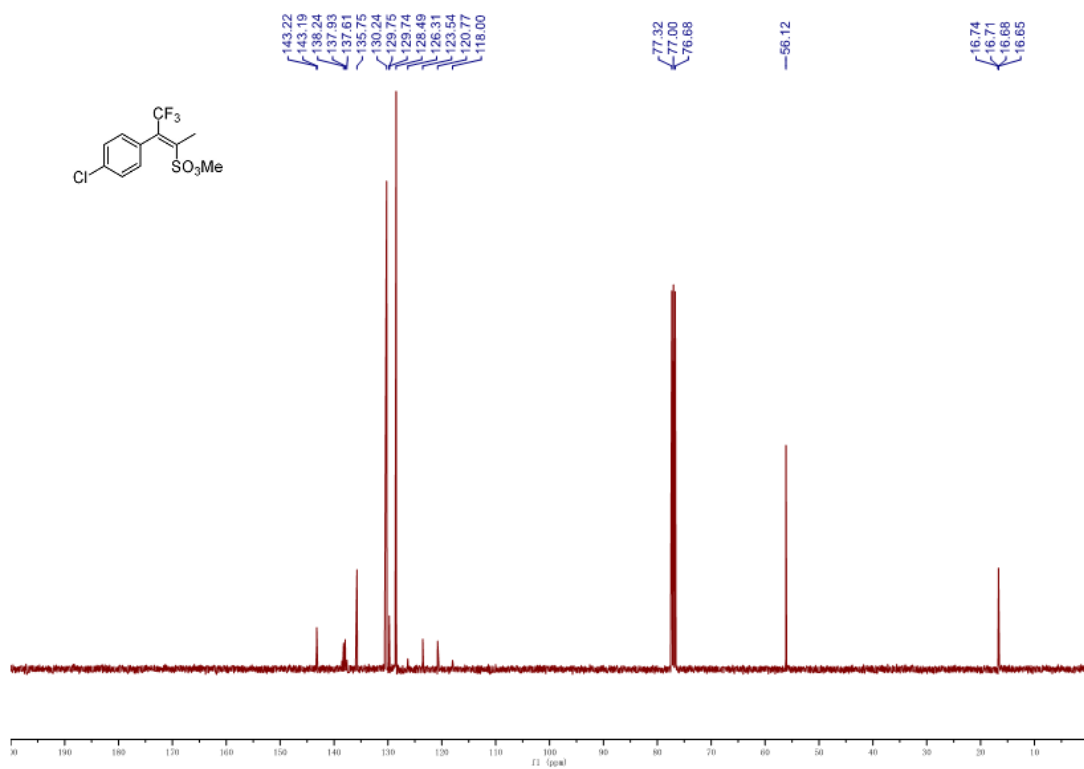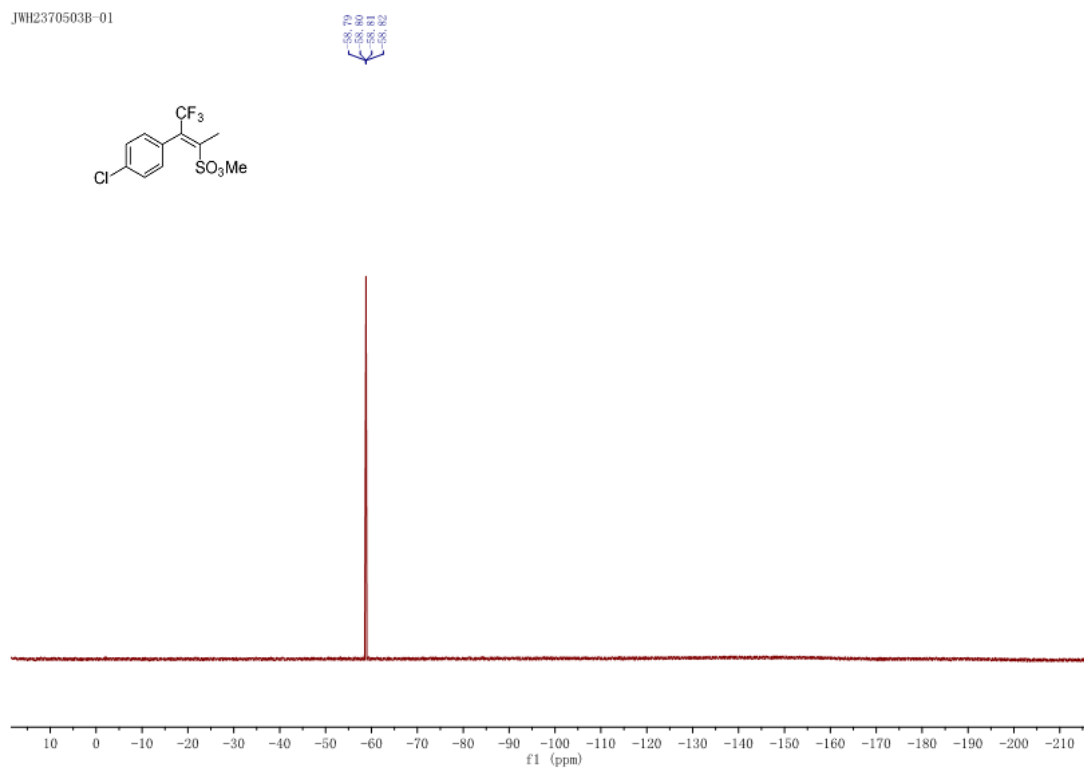

JWH2370503A-01

7.52 7.48 7.44 7.40 7.36 7.32 7.28 7.24 7.20 7.16 7.12 7.08 7.04 7.00 6.96 6.92 6.88 6.84 6.80 6.76 6.72 6.68 6.64 6.60 6.56 6.52 6.48 6.44 6.40 6.36 6.32 6.28 6.24 6.20 6.16 6.12 6.08 6.04 6.00 5.96 5.92 5.88 5.84 5.80 5.76 5.72 5.68 5.64 5.60 5.56 5.52 5.48 5.44 5.40 5.36 5.32 5.28 5.24 5.20 5.16 5.12 5.08 5.04 5.00 4.96 4.92 4.88 4.84 4.80 4.76 4.72 4.68 4.64 4.60 4.56 4.52 4.48 4.44 4.40 4.36 4.32 4.28 4.24 4.20 4.16 4.12 4.08 4.04 4.00 3.96 3.92 3.88 3.84 3.80 3.76 3.72 3.68 3.64 3.60 3.56 3.52 3.48 3.44 3.40 3.36 3.32 3.28 3.24 3.20 3.16 3.12 3.08 3.04 3.00 2.96 2.92 2.88 2.84 2.80 2.76 2.72 2.68 2.64 2.60 2.56 2.52 2.48 2.44 2.40 2.36 2.32 2.28 2.24 2.20 2.16 2.12 2.08 2.04 2.00 1.96 1.92 1.88 1.84 1.80 1.76 1.72 1.68 1.64 1.60 1.56 1.52 1.48 1.44 1.40 1.36 1.32 1.28 1.24 1.20 1.16 1.12 1.08 1.04 1.00 0.96 0.92 0.88 0.84 0.80 0.76 0.72 0.68 0.64 0.60 0.56 0.52 0.48 0.44 0.40 0.36 0.32 0.28 0.24 0.20 0.16 0.12 0.08 0.04 0.00

-3.70

1.18  
1.14  
1.10

-1.88

-0.00

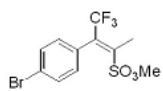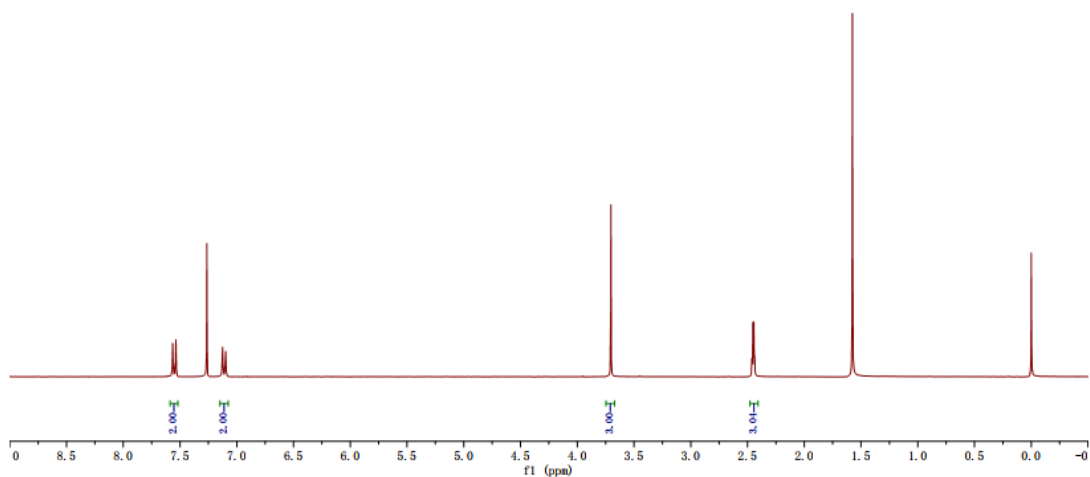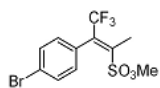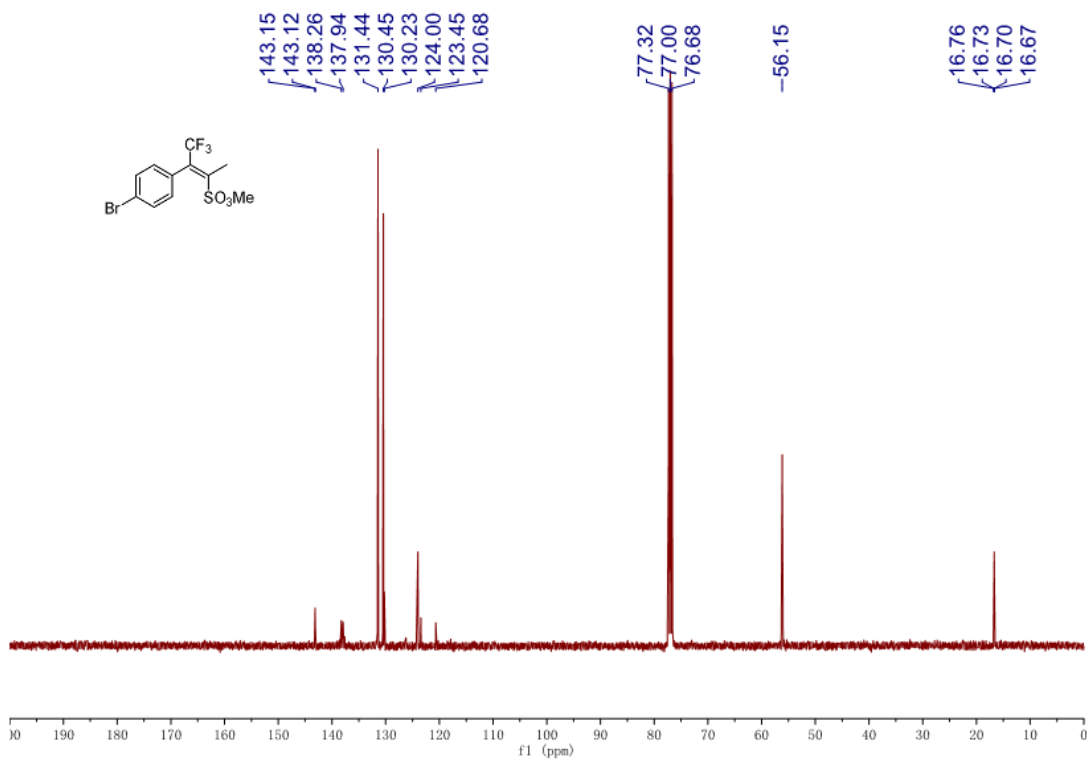

JWH2370503A-01

1.77  
1.75  
1.73  
1.71

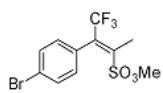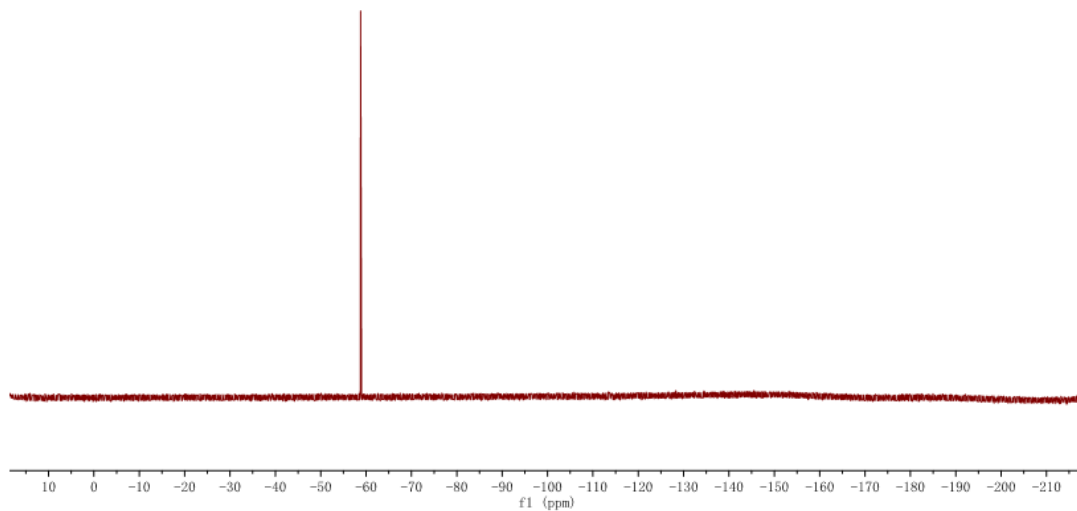

JWH2370502C-01

7.77  
7.75  
7.73  
7.71

7.26  
7.24  
7.22

3.70

2.54  
2.52  
2.50  
2.48

1.88

0.00

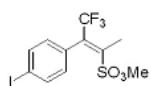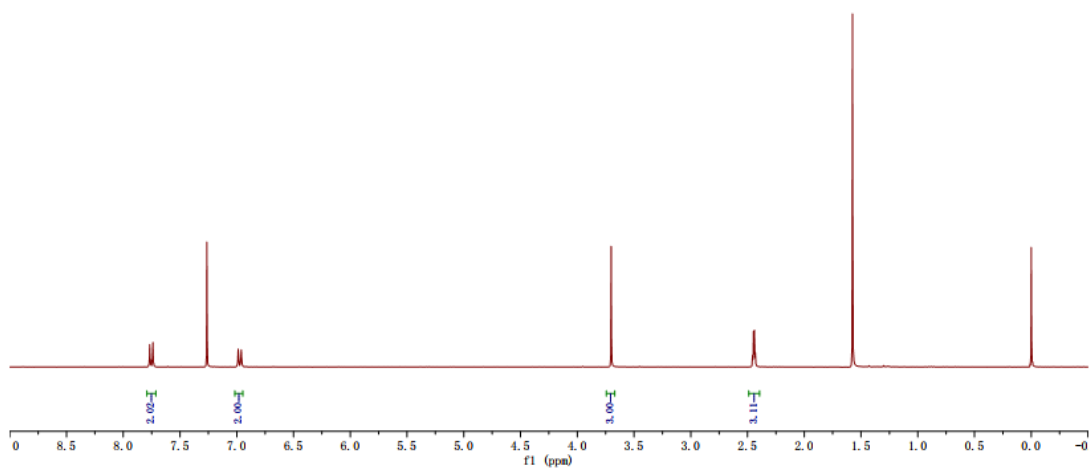

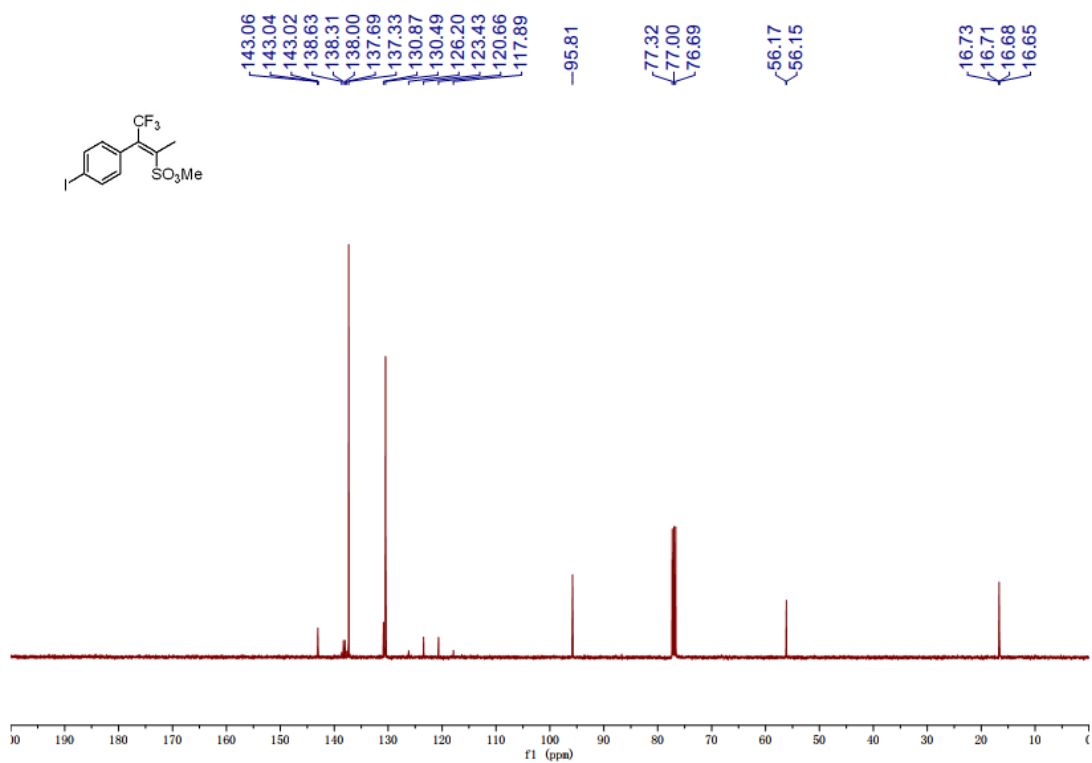

JWH2370502C-01

13C NMR

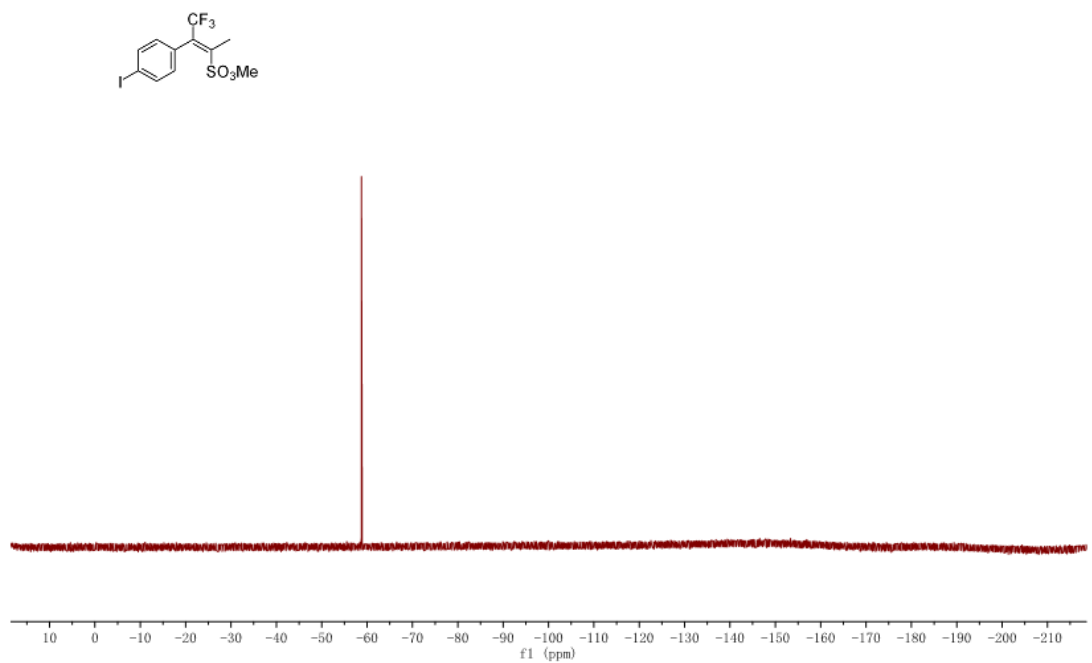

JWH2370503D-1

7.69  
7.67  
7.67  
7.67  
7.67  
7.67  
7.67  
7.67  
7.67  
7.67

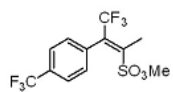

3.72

2.18  
2.18  
2.17

1.88

0.00  
0.00

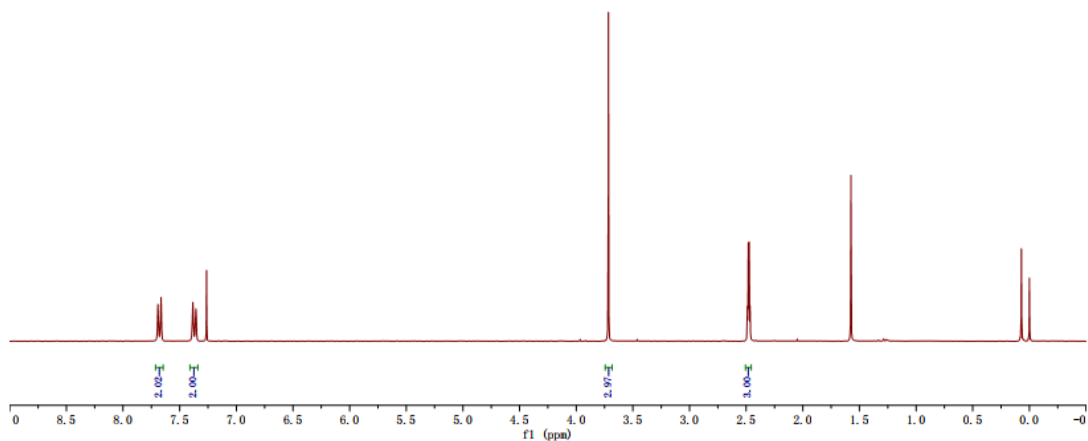

143.54  
143.52  
138.04  
137.72  
135.11  
131.69  
131.36  
131.03  
129.36  
125.21  
125.17  
125.14  
125.10  
125.06  
123.45  
122.35  
120.69

77.32  
77.00  
76.68

56.18

16.73  
16.71  
16.68  
16.65

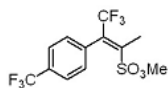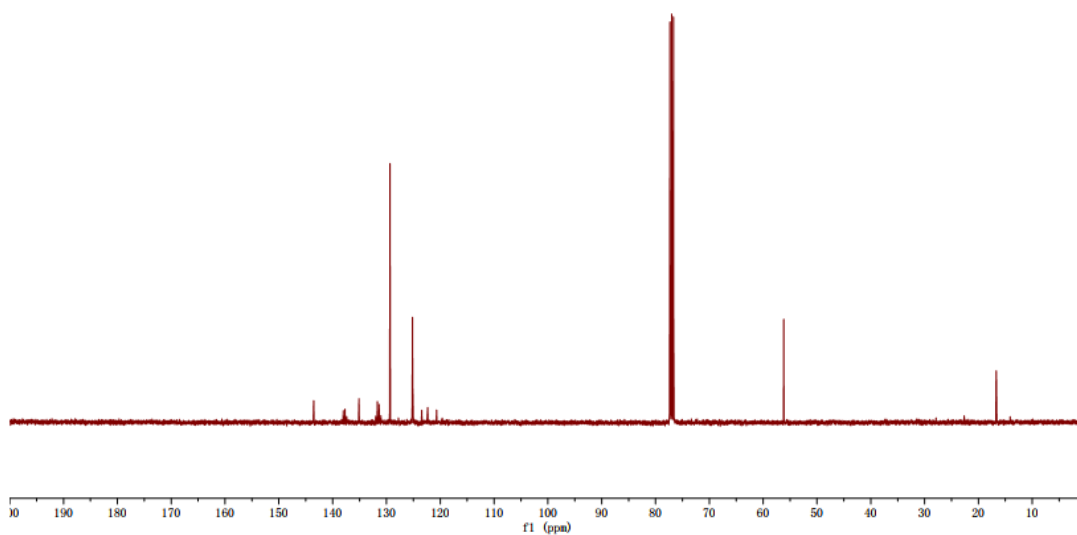

JWH2370503D-1

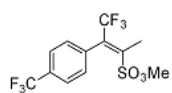

158.456  
158.457  
158.458  
158.459  
152.966

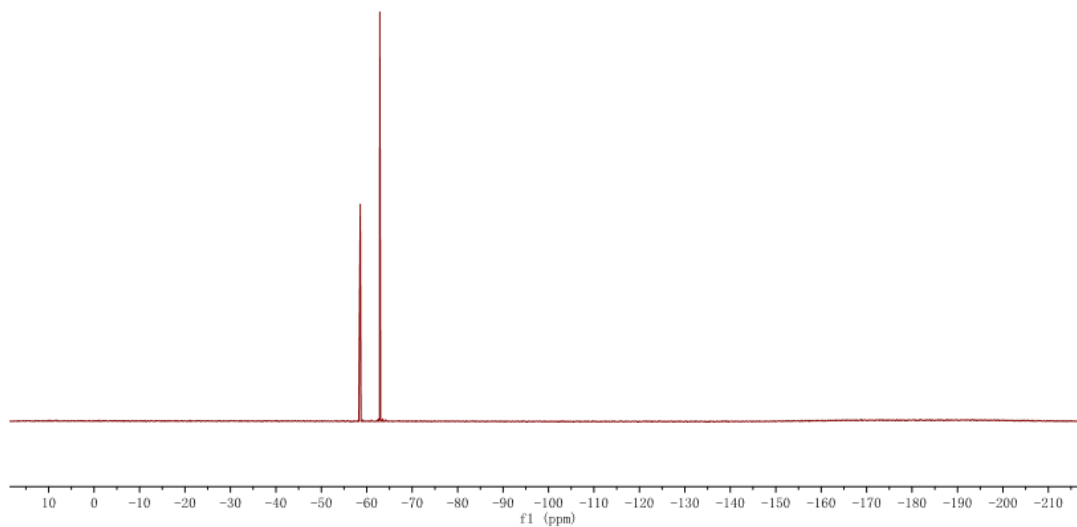

JWH2370504F-01

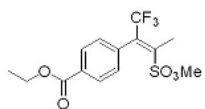

158.456  
158.457  
158.458  
158.459  
152.966

158.456  
158.457  
158.458  
158.459  
152.966

158.456  
158.457  
158.458  
158.459  
152.966

158.456  
158.457  
158.458  
158.459  
152.966

158.456  
158.457  
158.458  
158.459  
152.966

158.456  
158.457  
158.458  
158.459  
152.966

158.456  
158.457  
158.458  
158.459  
152.966

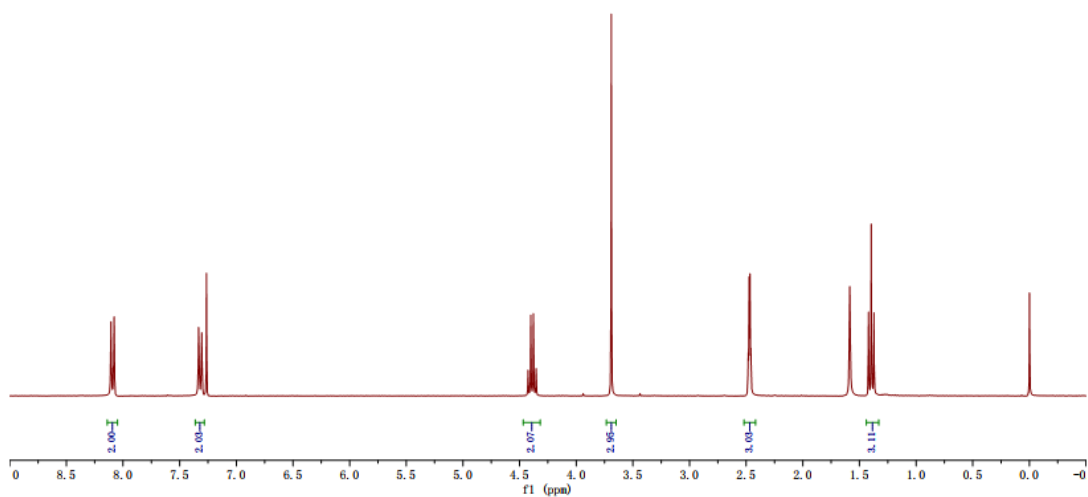



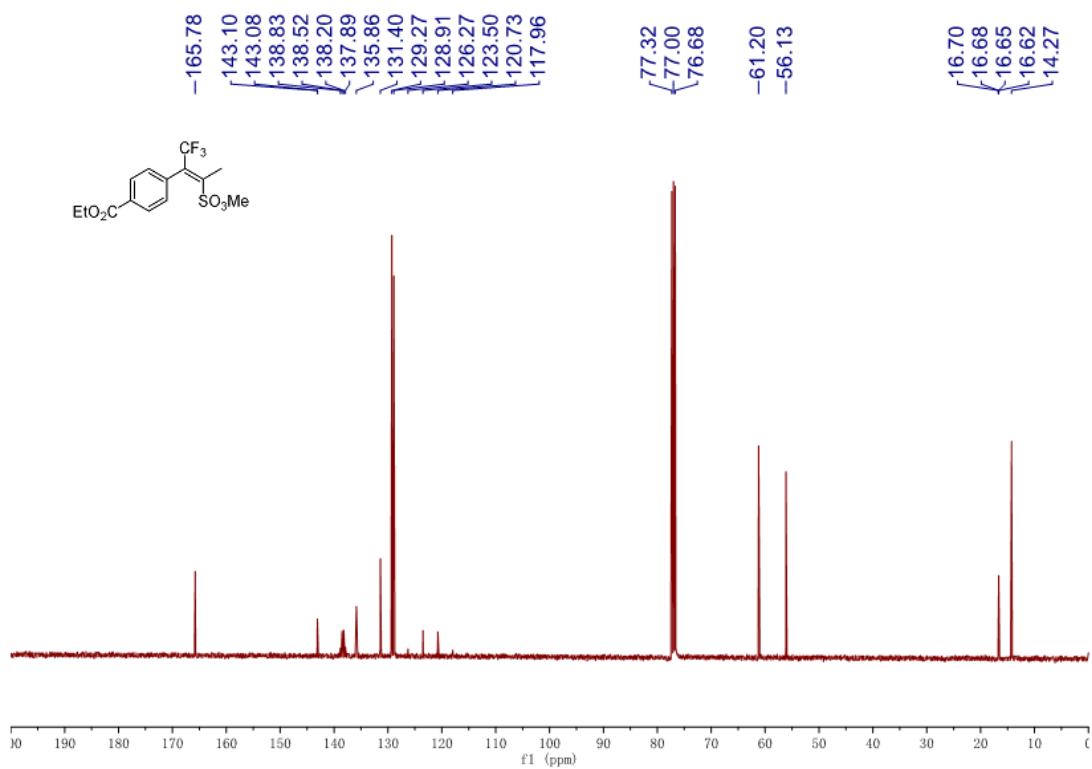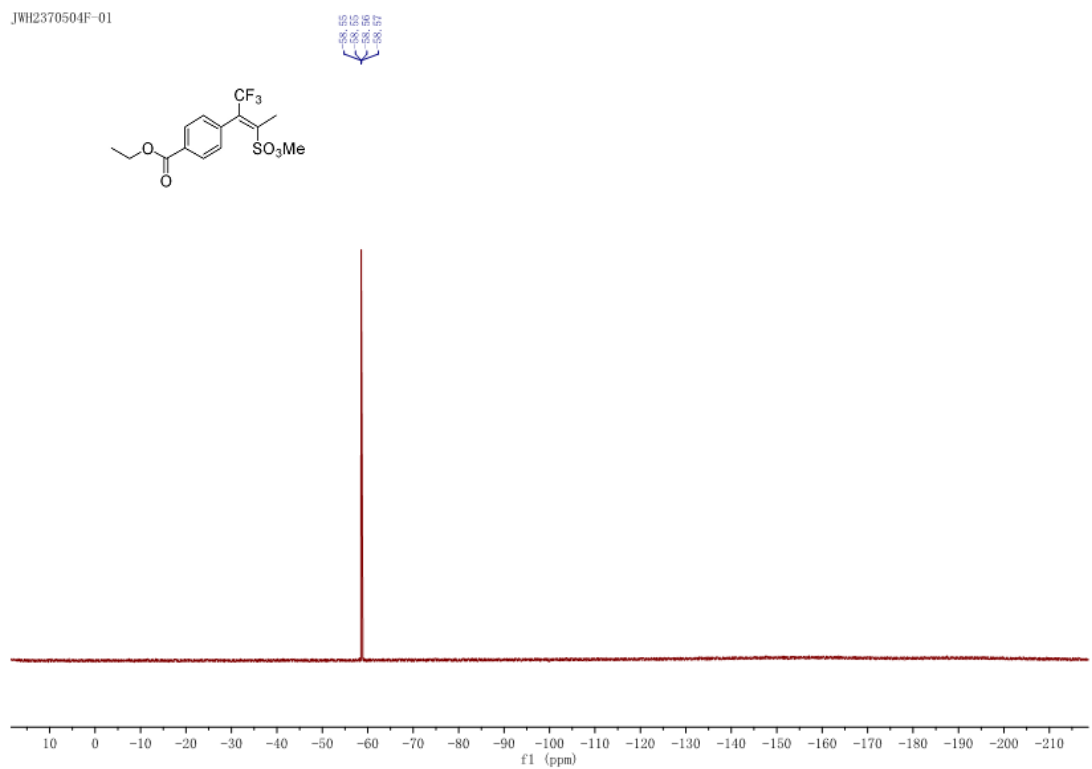

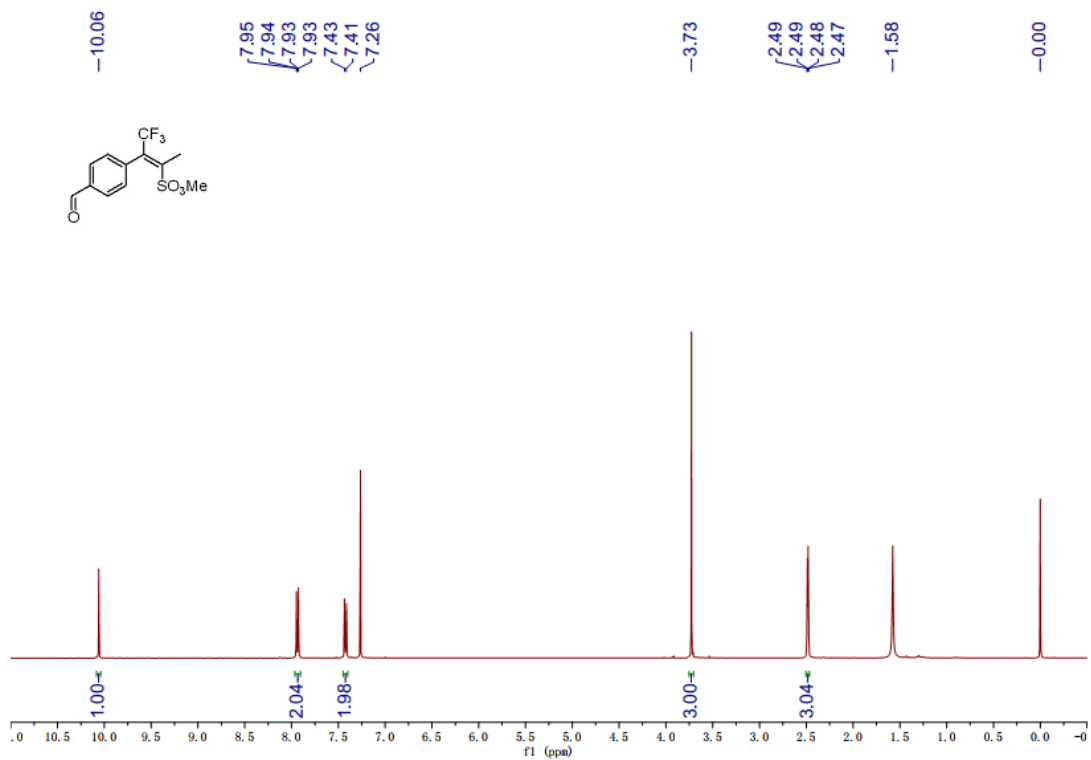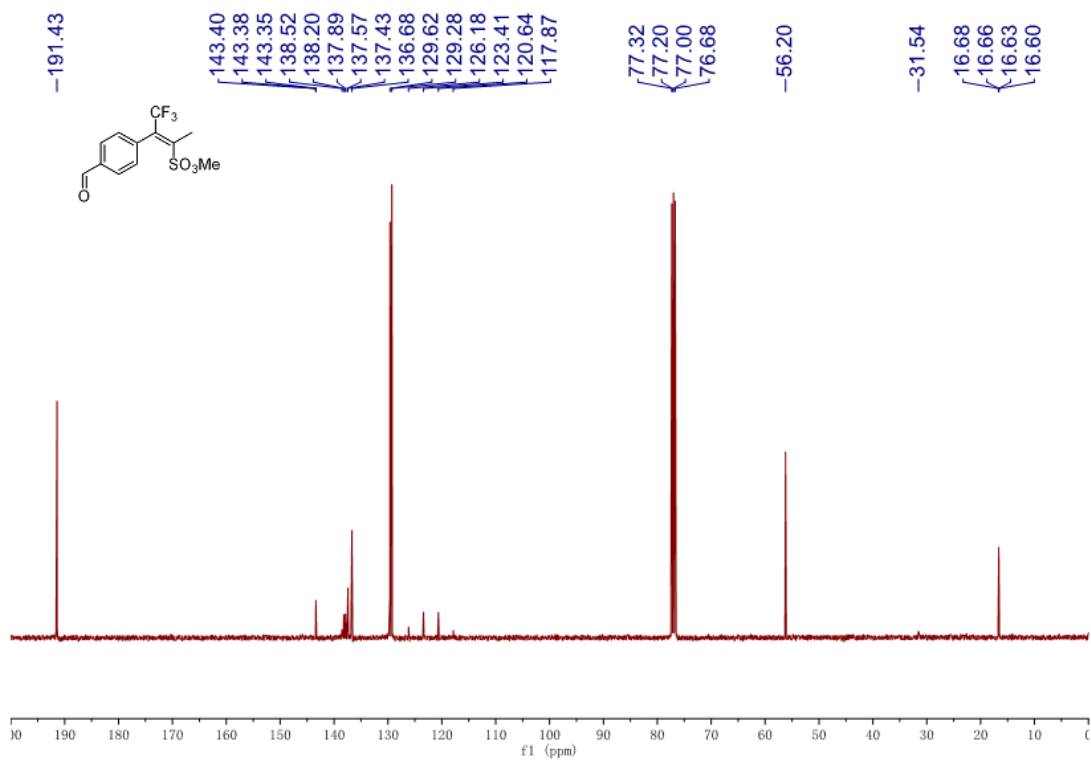

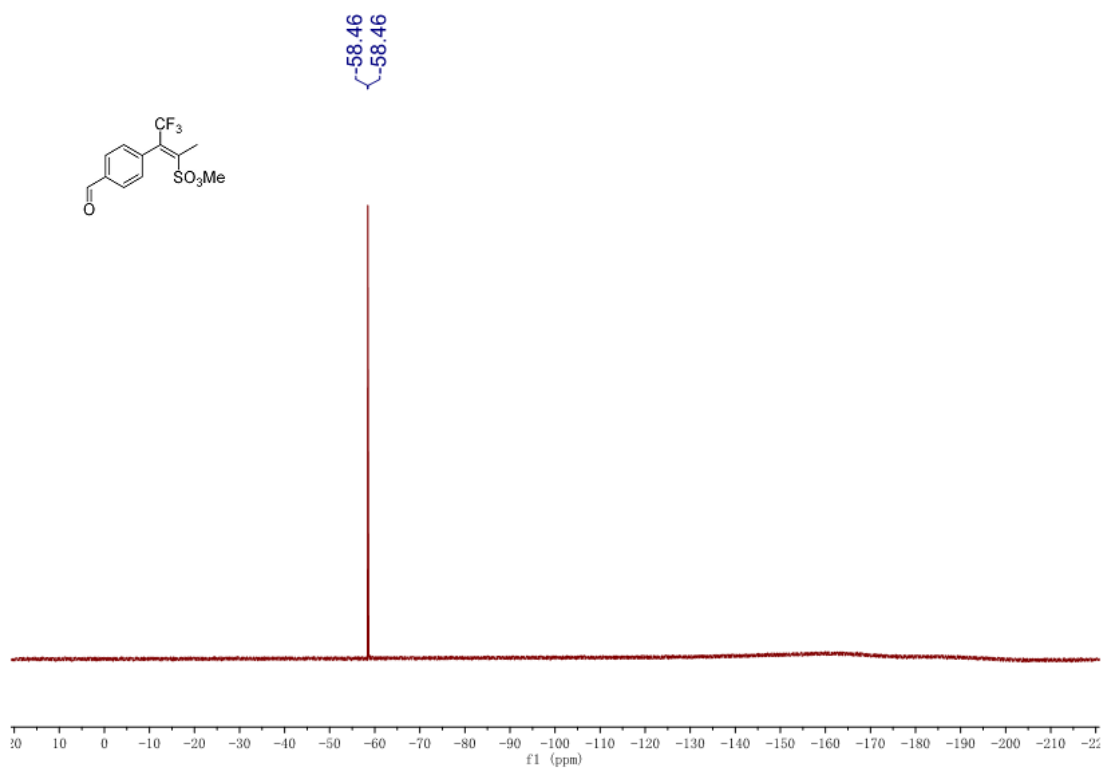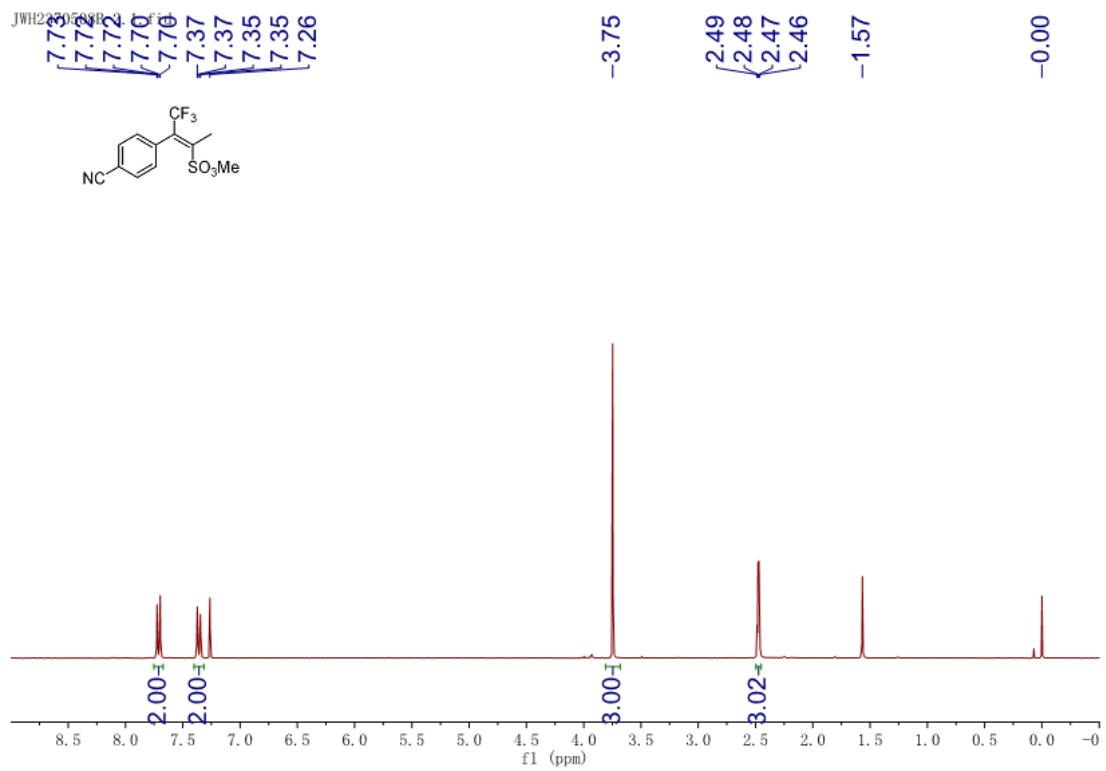

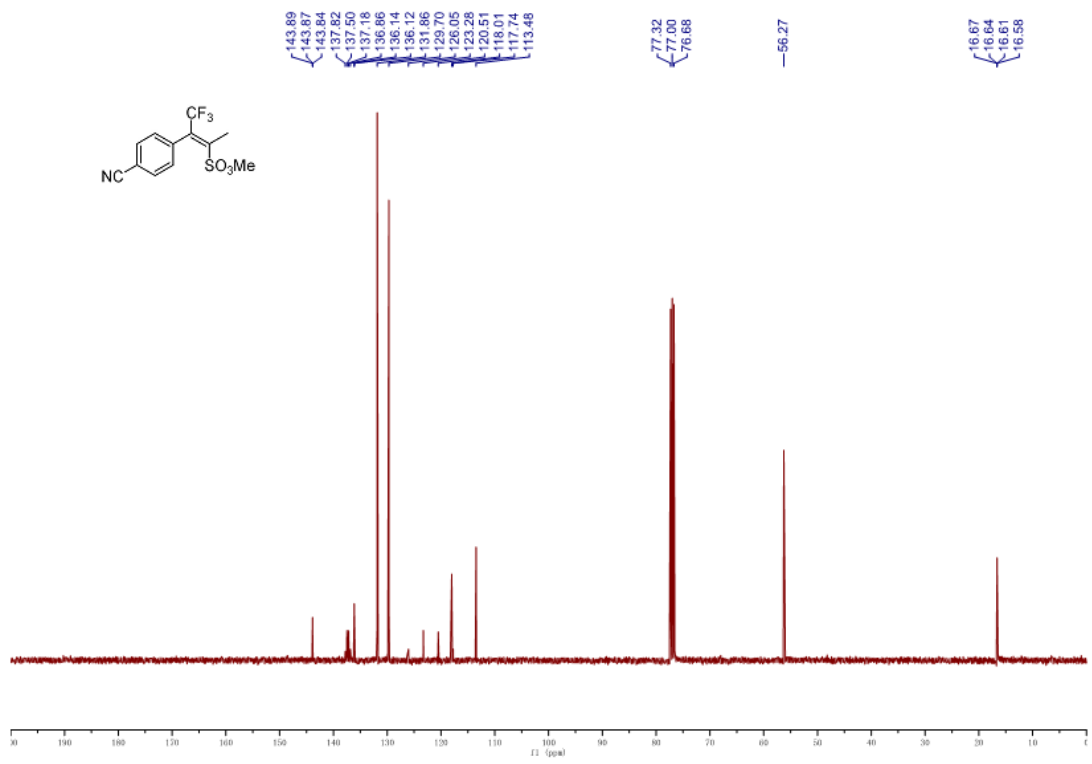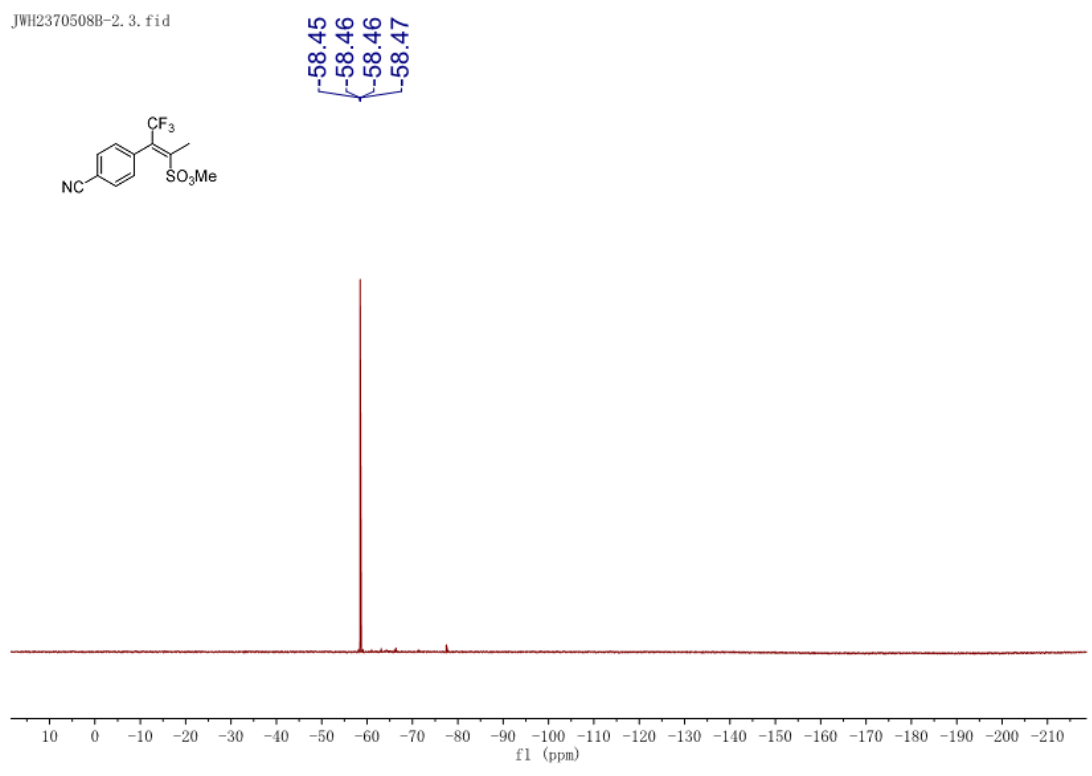

JWH2370507B-1

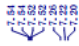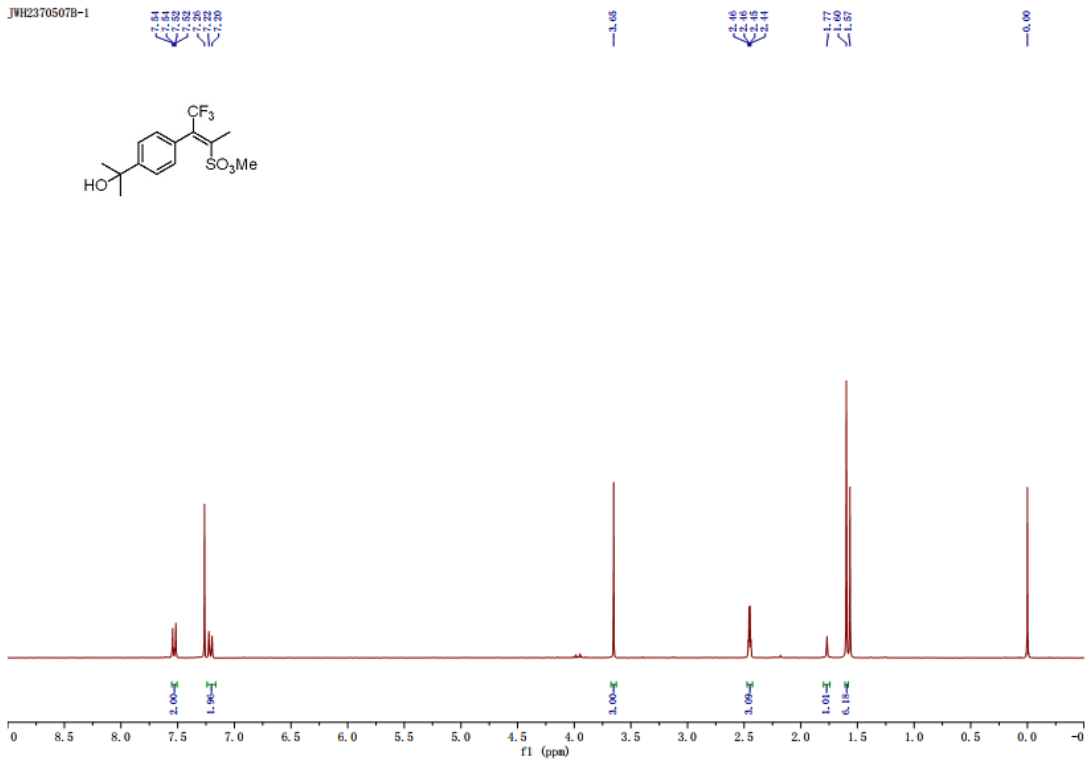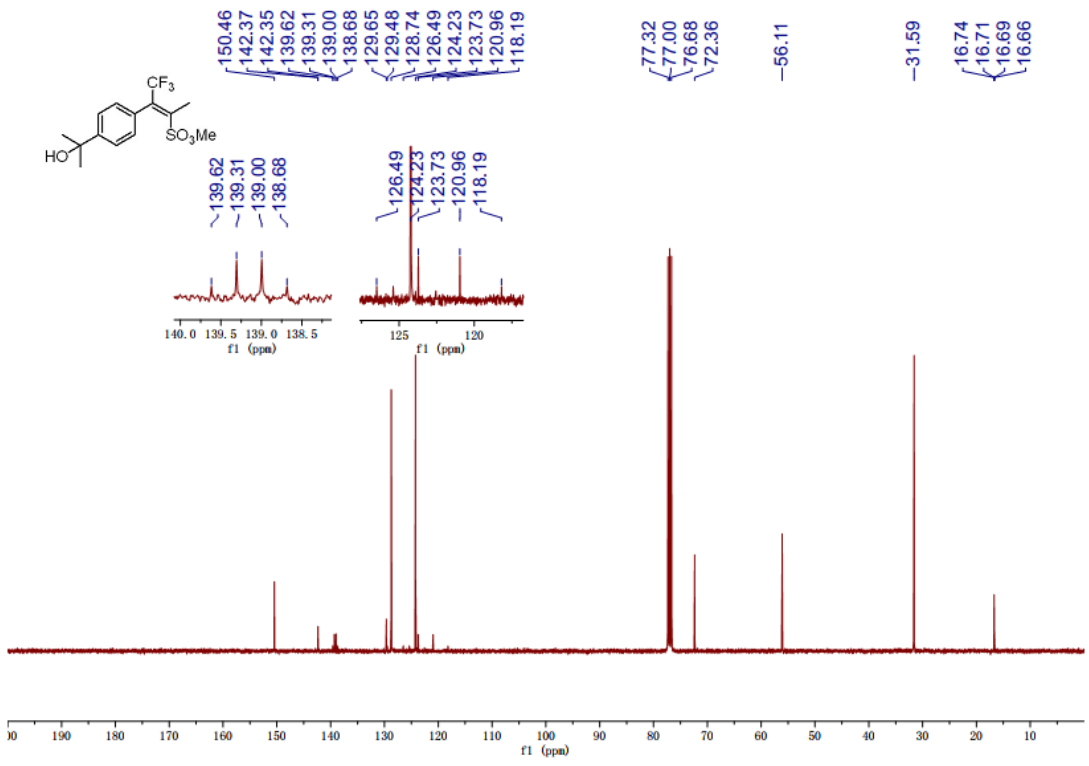

JWH2370507B-1

136.80  
136.72  
136.63  
136.54

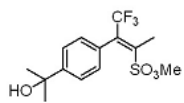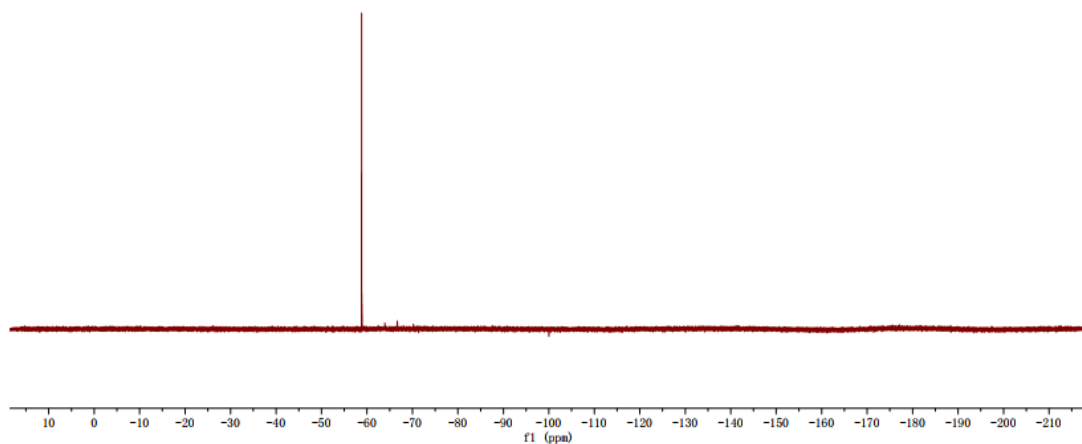

JWH2370504BB-0001

7.56  
7.55  
7.55  
7.28  
7.28  
7.27  
7.26

3.68  
3.66  
3.65  
3.63  
3.44  
3.43  
3.41

2.47  
2.46  
2.45  
2.45  
1.99  
1.98  
1.97  
1.95  
1.95  
1.90  
1.88  
1.87  
1.86

-0.00

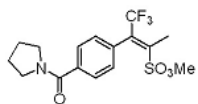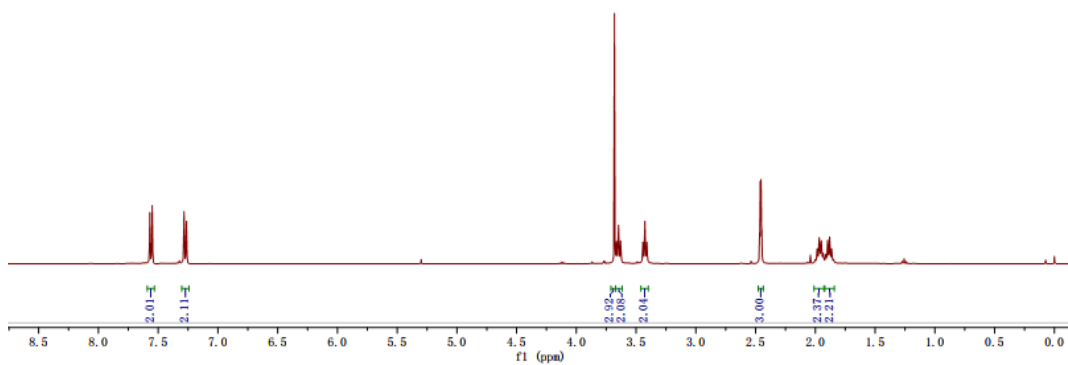

WH2370504BB-0001.2.f1d

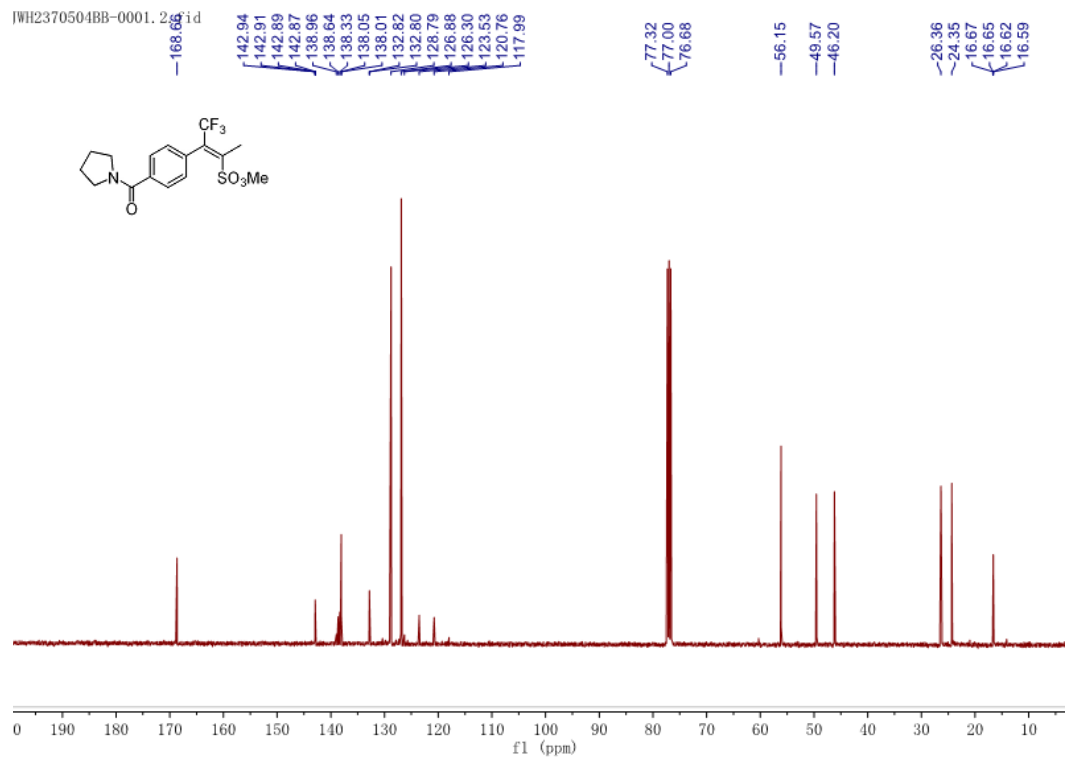

WH2370520A-02.3.f1d

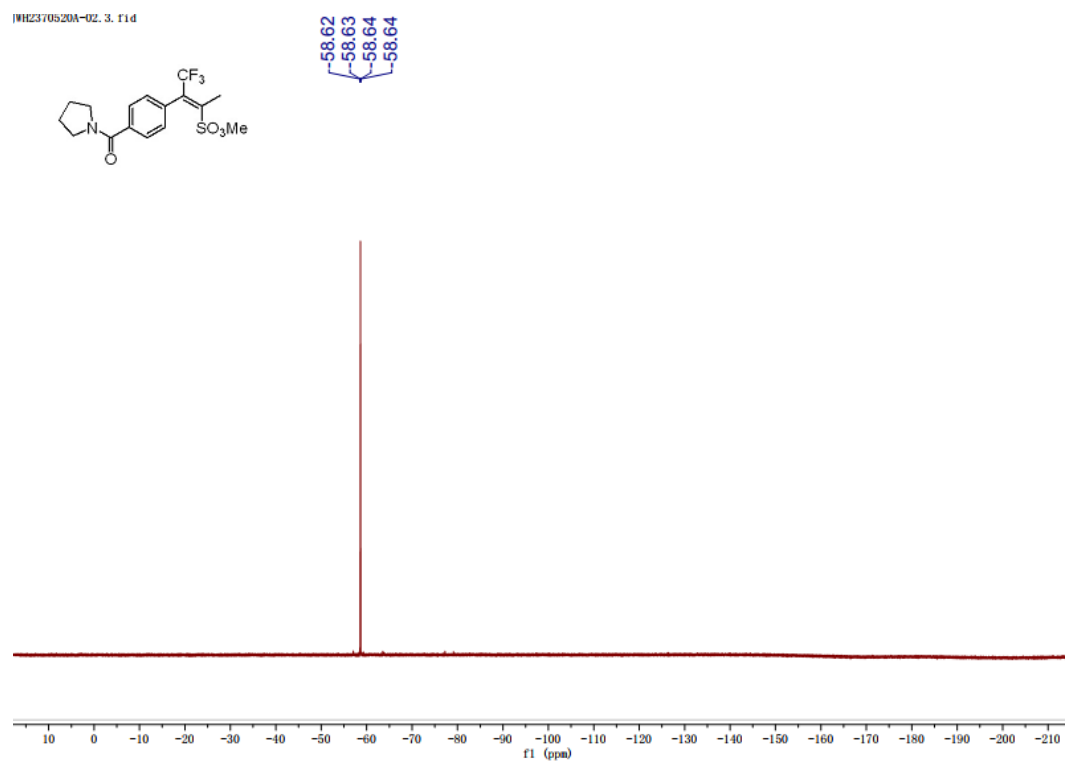

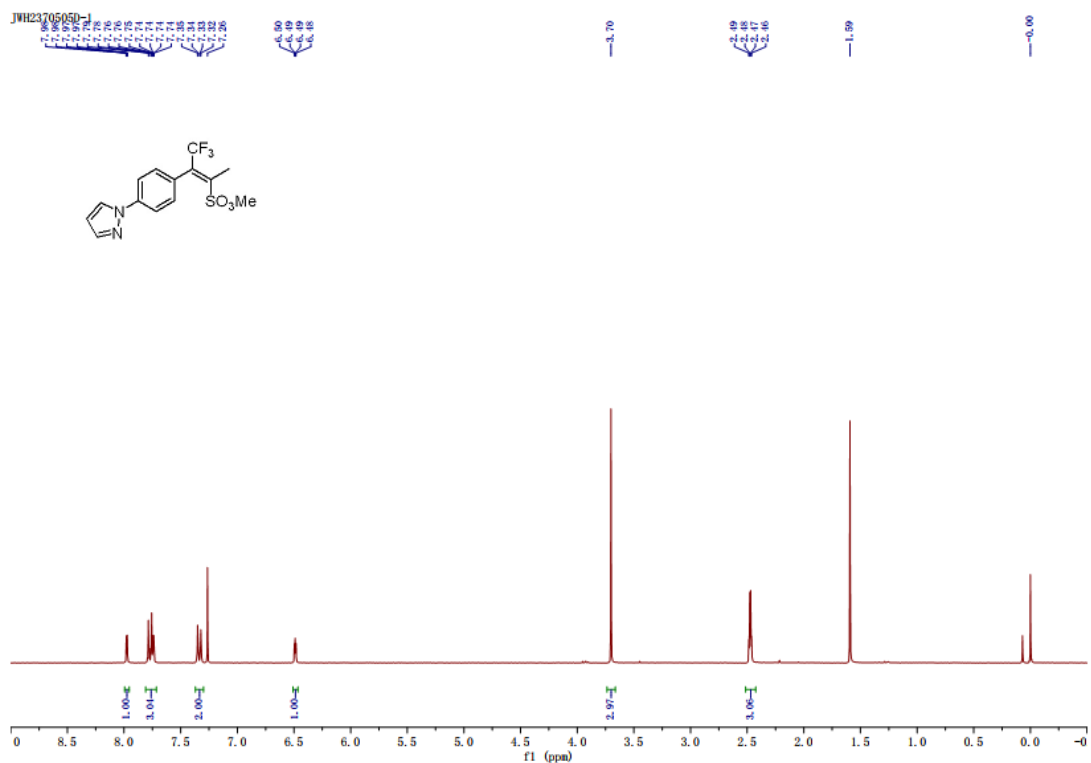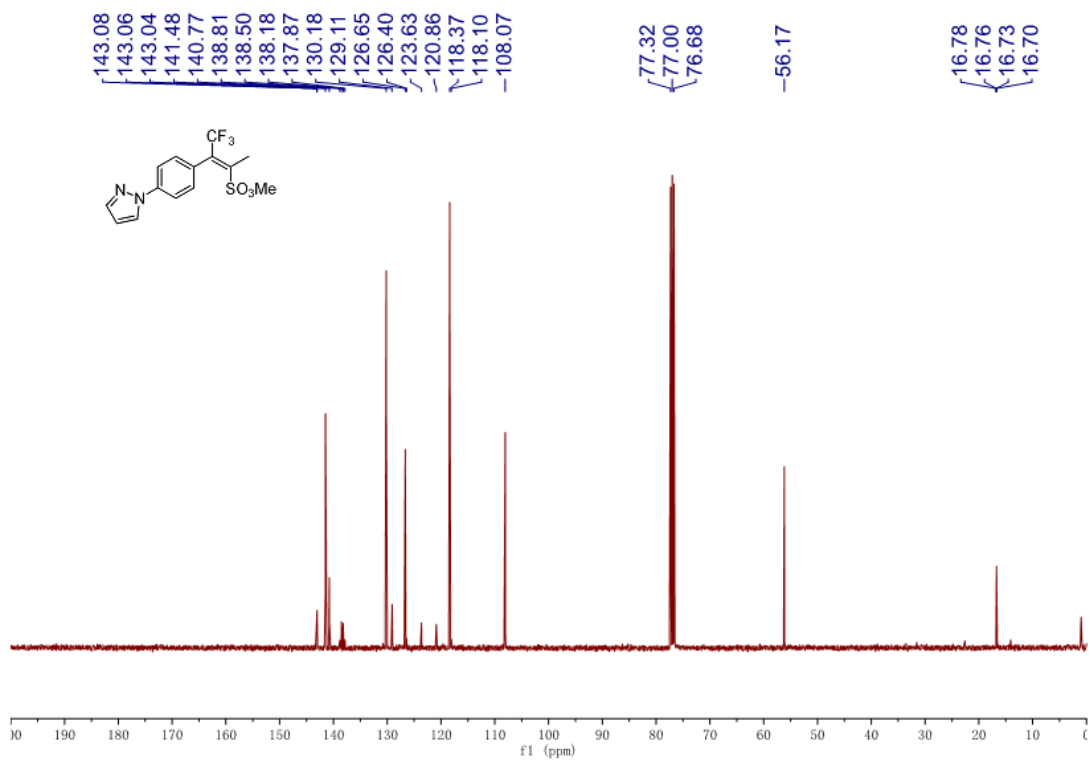



JWH2370505D-1

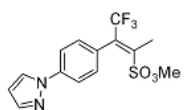

70.128  
70.126  
70.124  
70.122

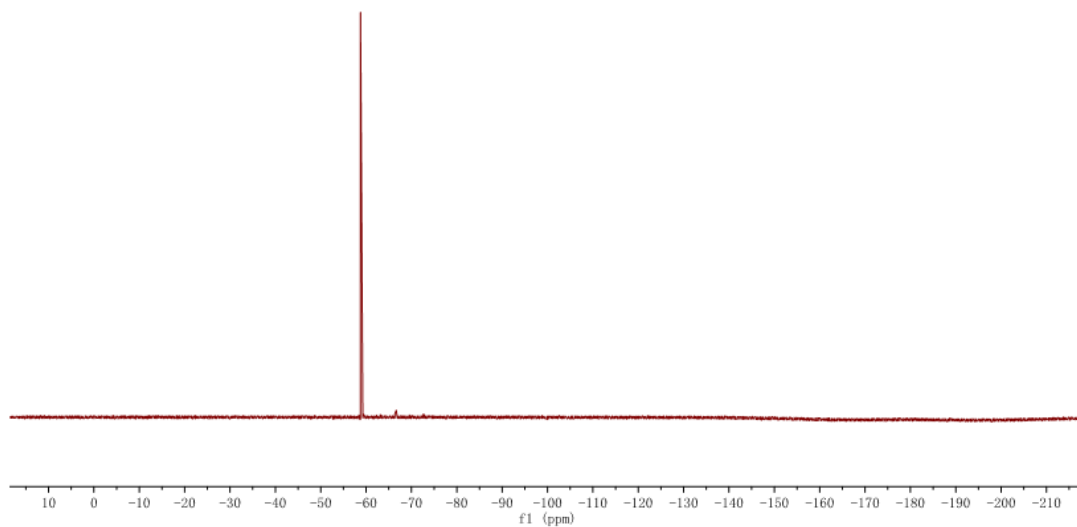

JWH2370514V-2.1.fid

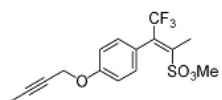

7.26  
7.18  
7.15  
7.00  
6.99  
6.97

4.68  
4.67  
4.66  
4.65

3.85

2.45  
2.44  
2.43

1.88  
1.87  
1.86

0.00

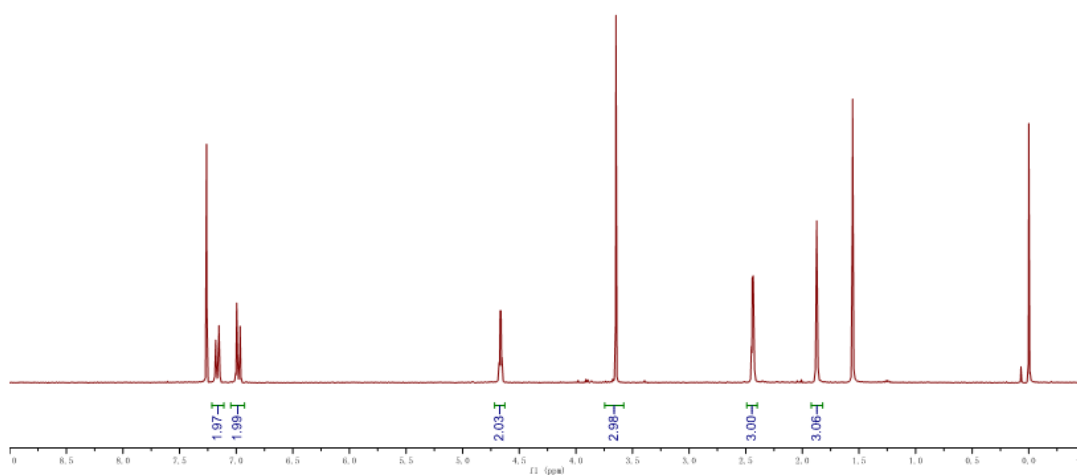

J002705144-2.2.Fid

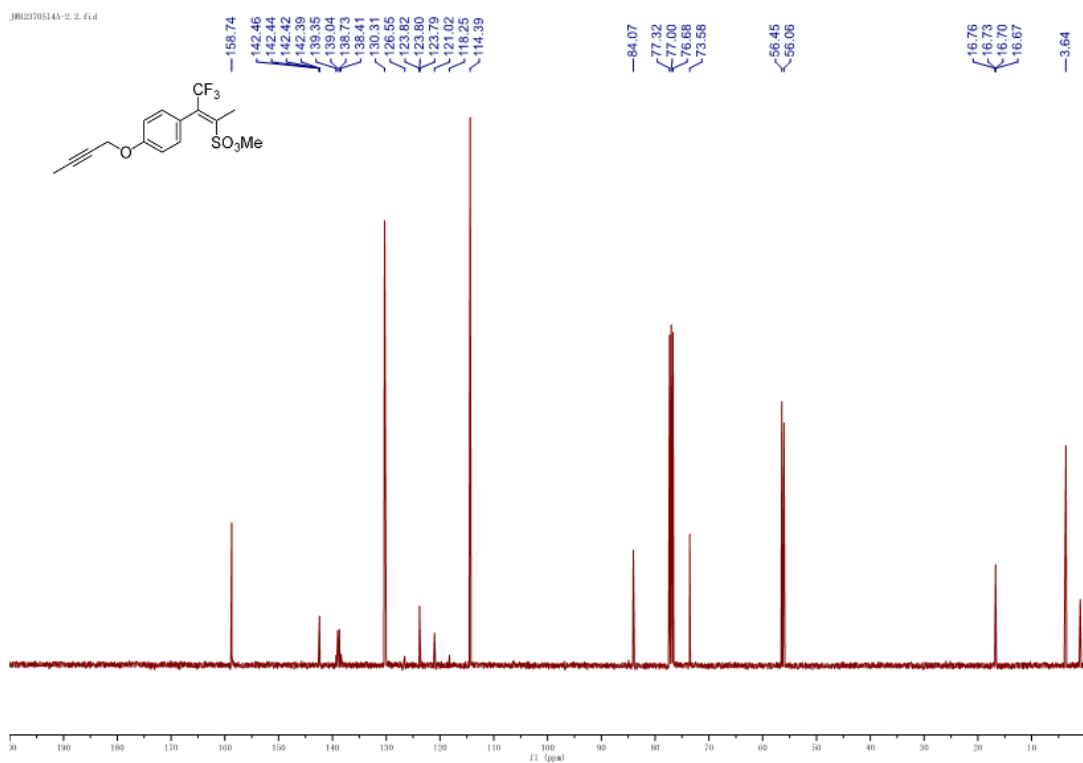

J002705144-2.3.Fid

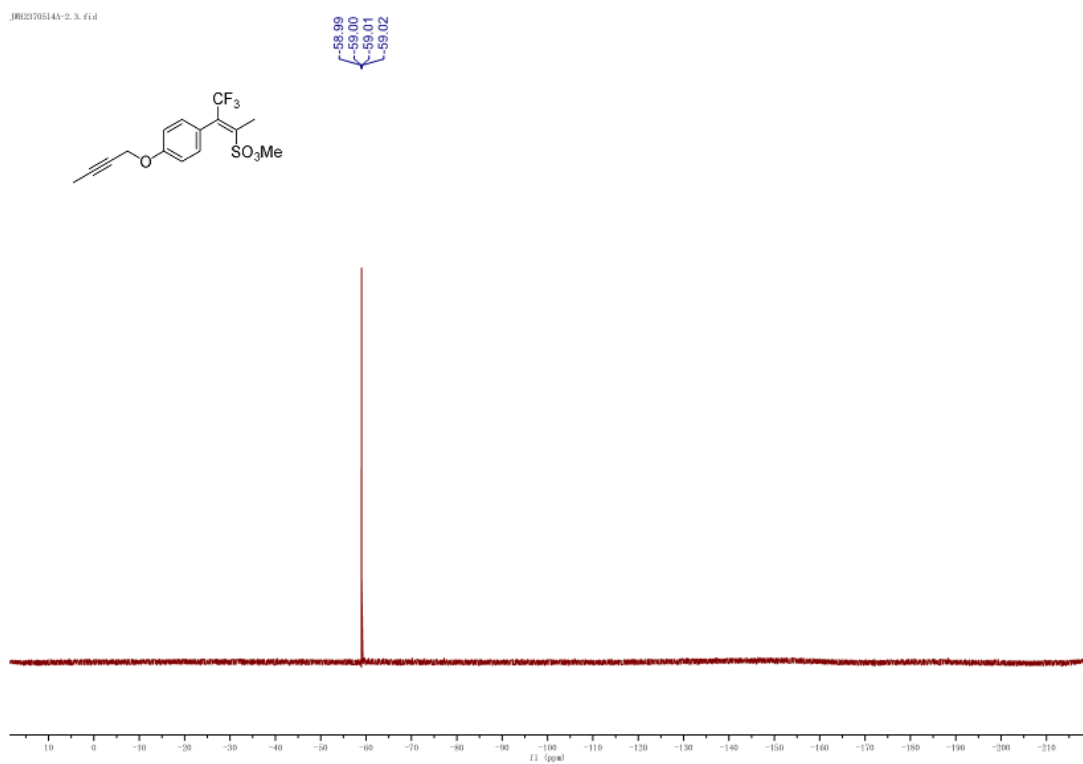

JWH2370503F-01

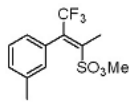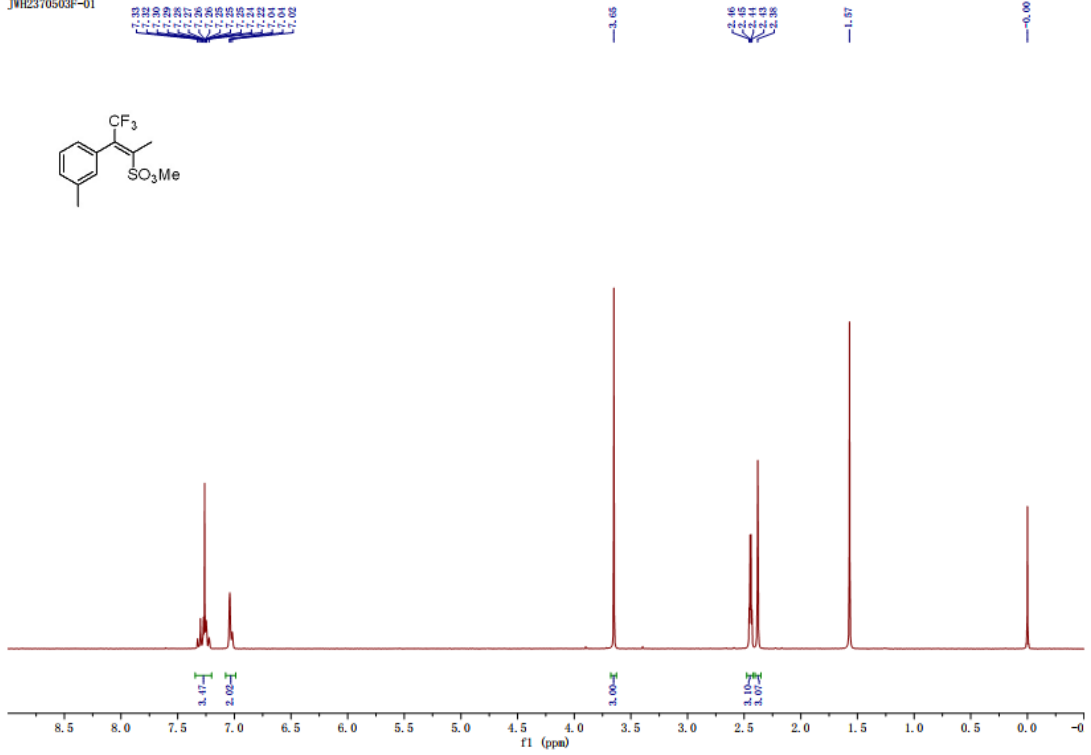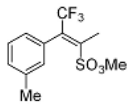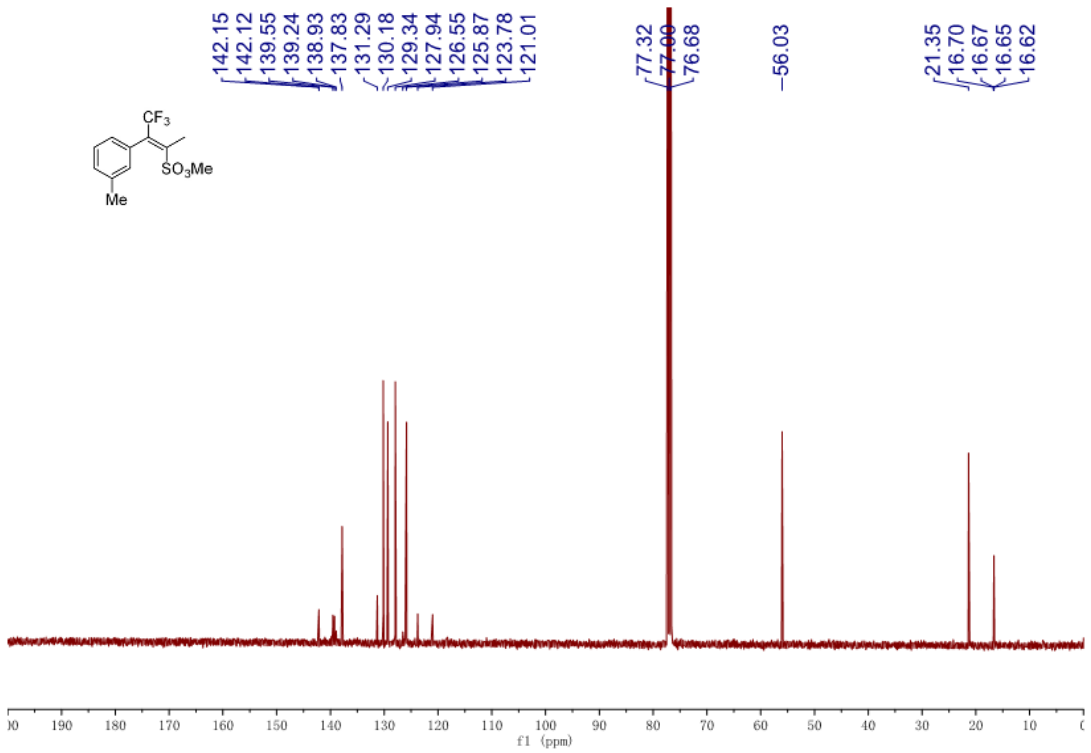

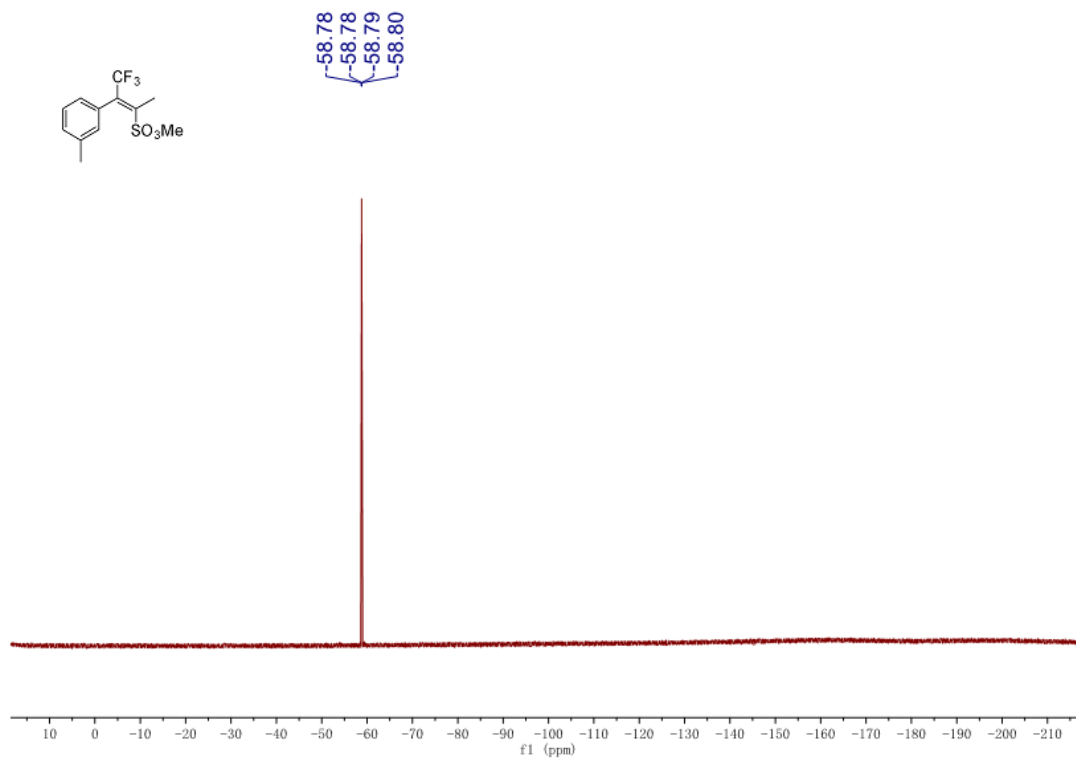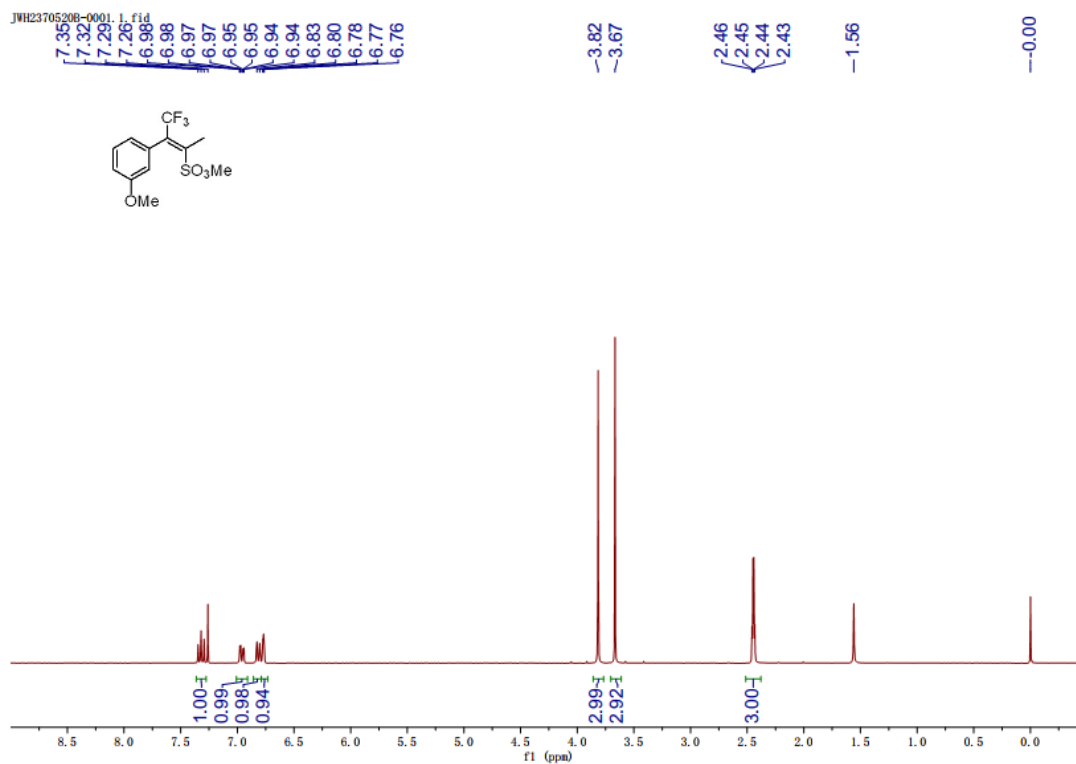

JR023705208-0001.2.Fid

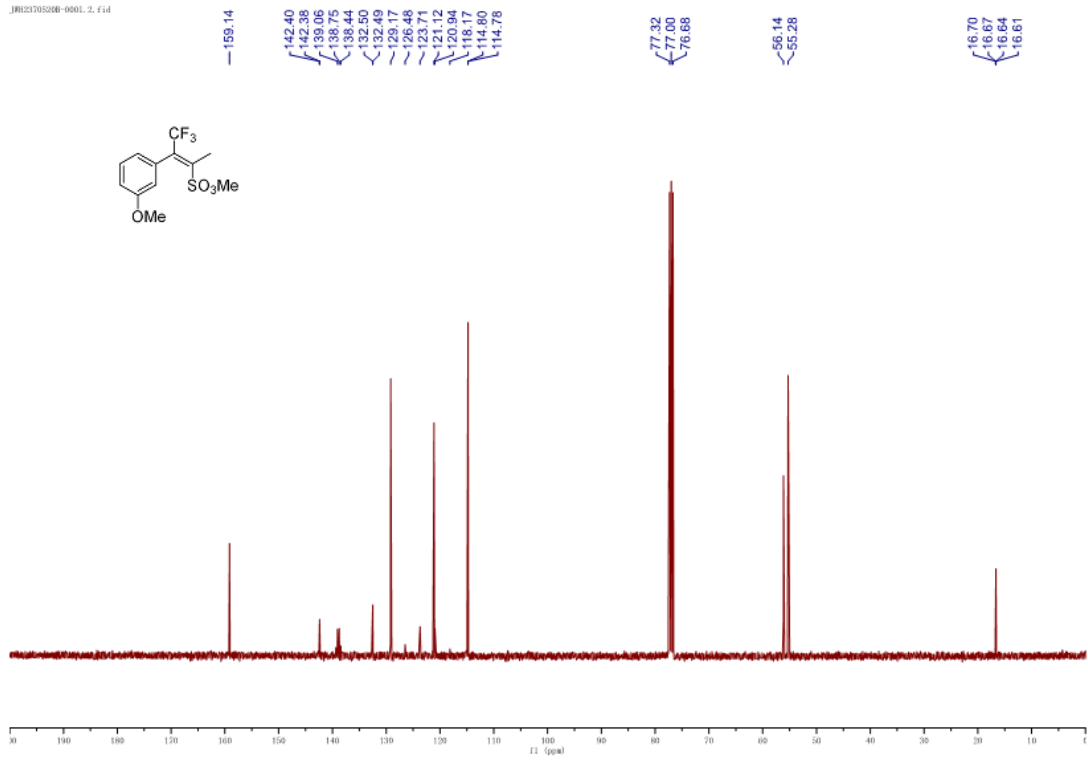

JR023705208-0001.3.Fid

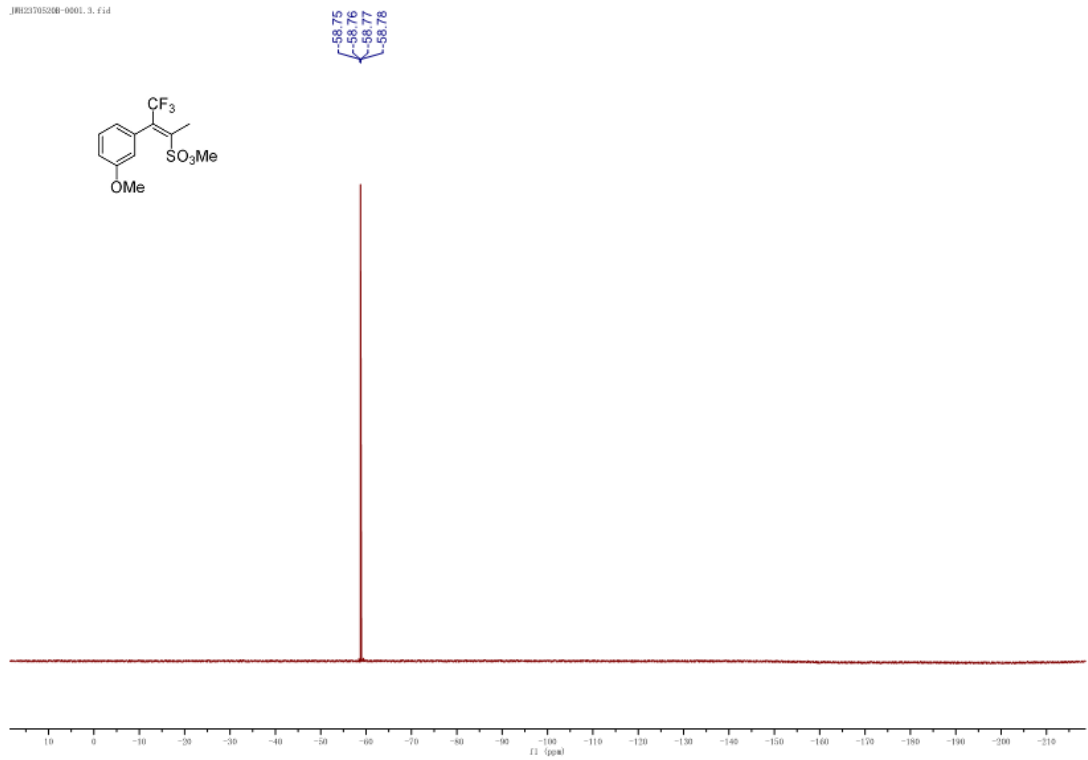

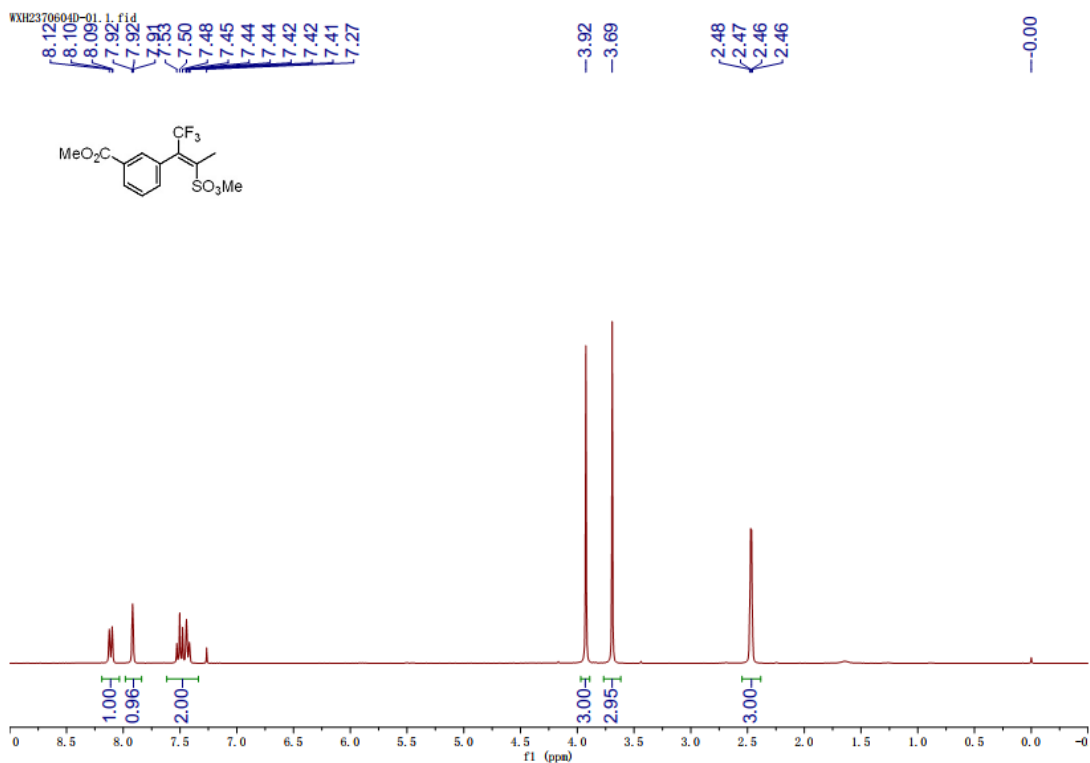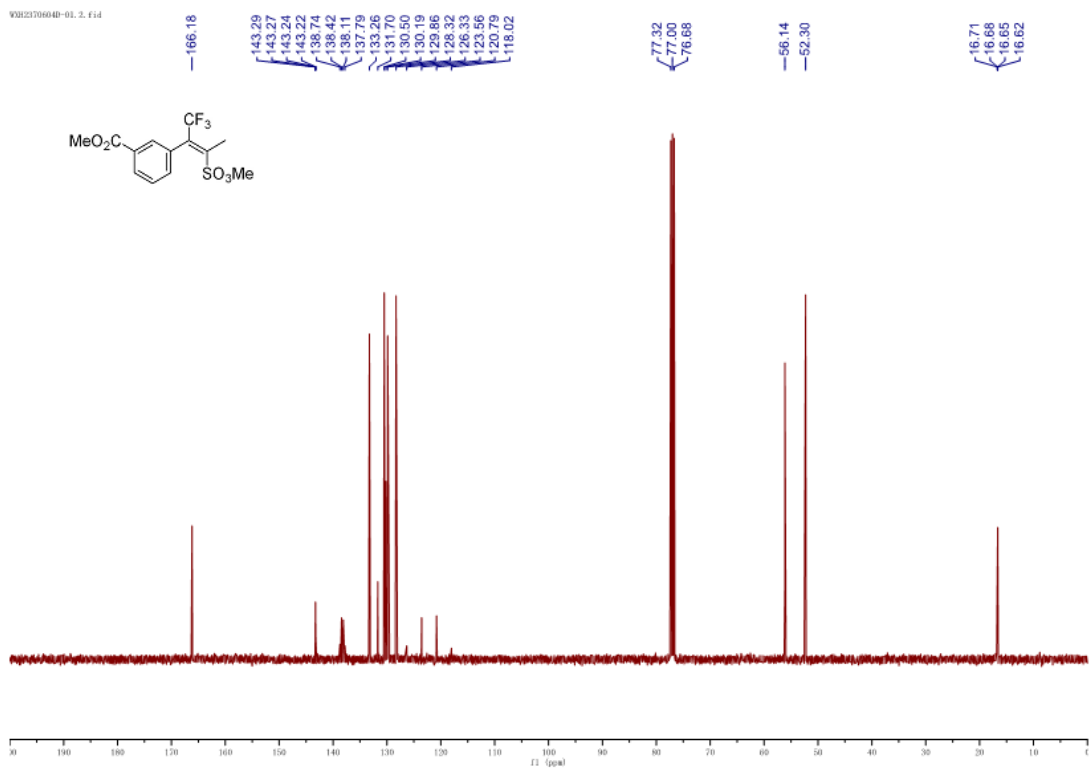

002370640-01.3.fid

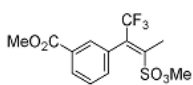

58.65  
58.67  
58.68

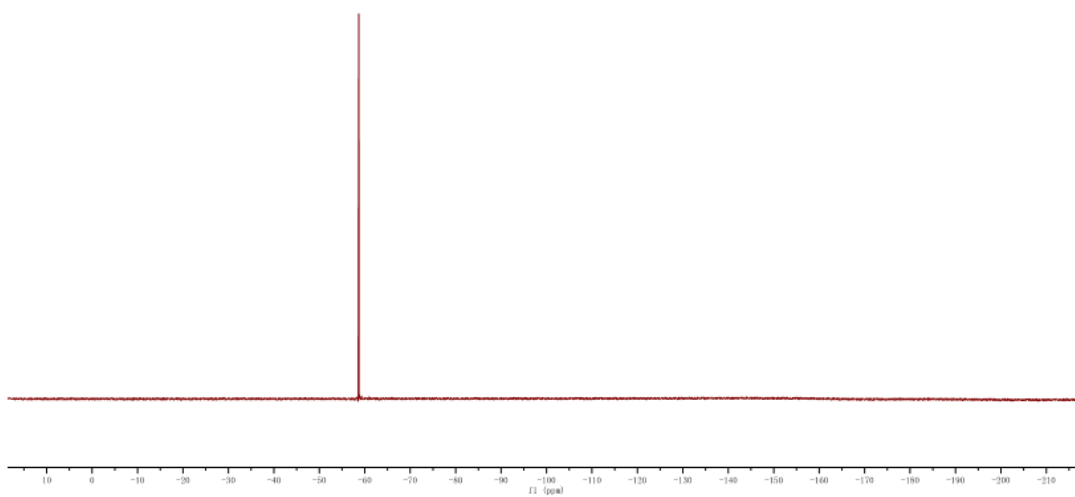

002370510-01.3.fid

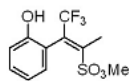

7.33

7.32

7.30

7.30

7.30

7.28

7.27

7.26

7.13

7.12

7.10

7.10

7.01

7.00

6.98

6.98

6.96

6.95

6.83

6.83

6.80

6.80

5.17

-3.73

2.47

2.47

2.46

2.45

-0.00

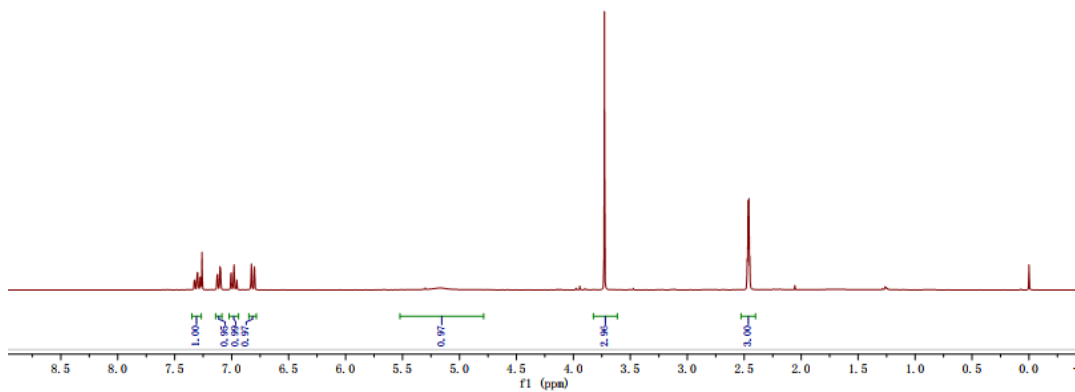

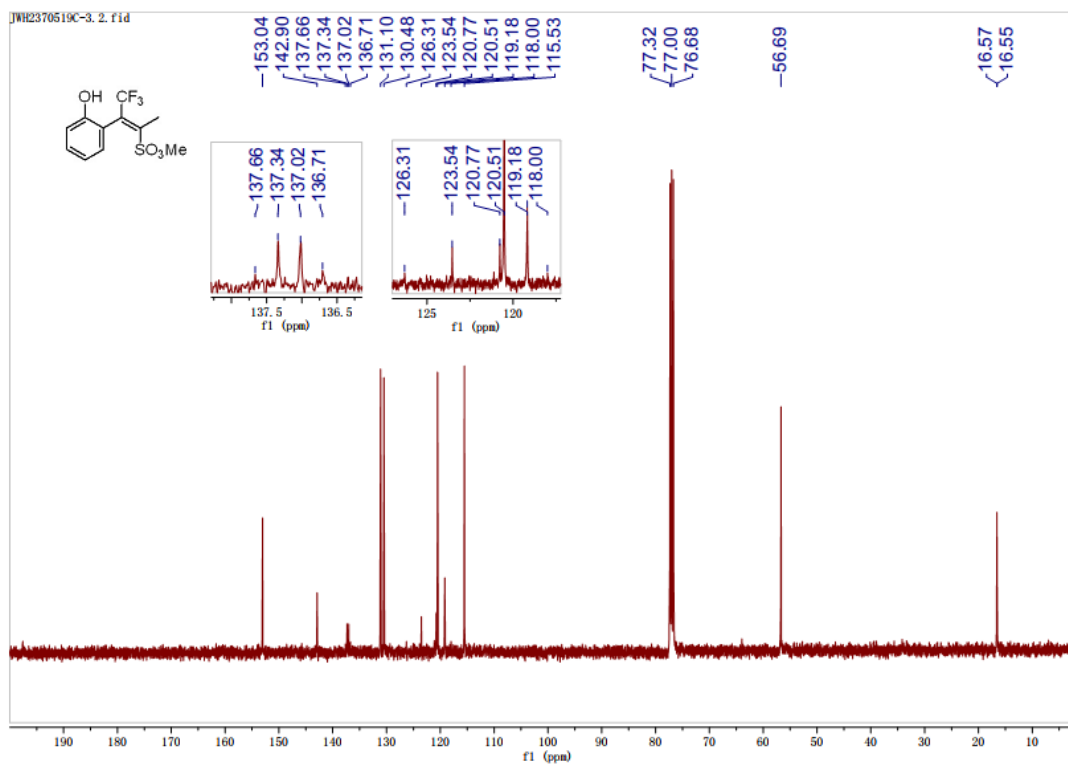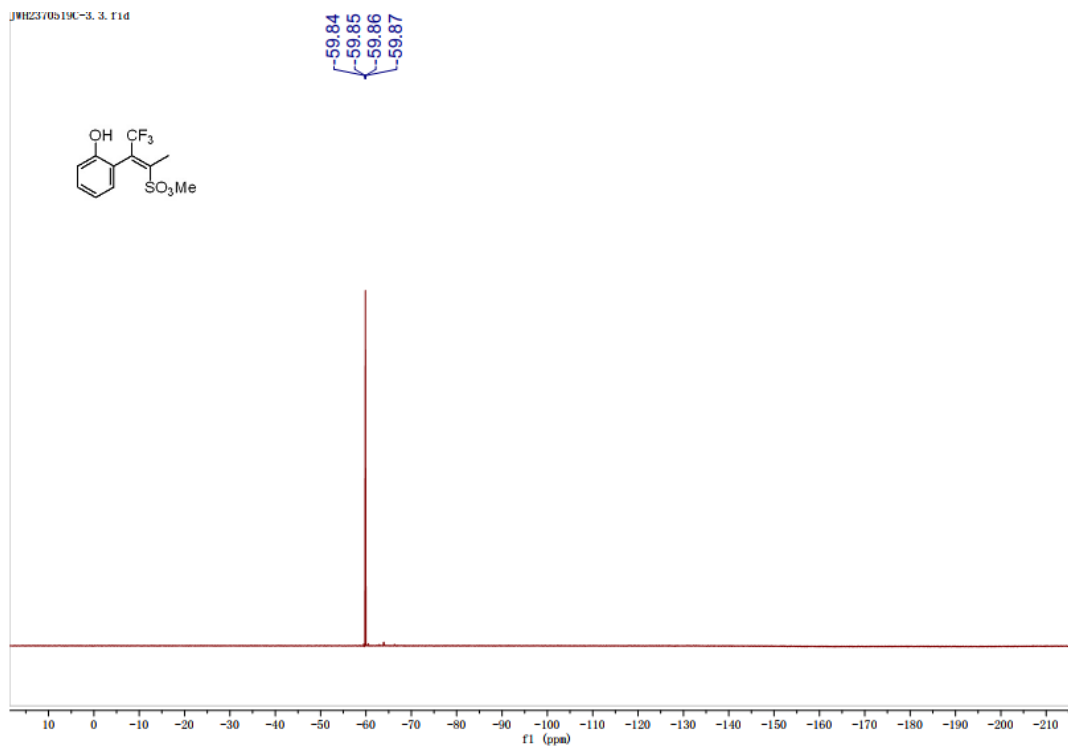



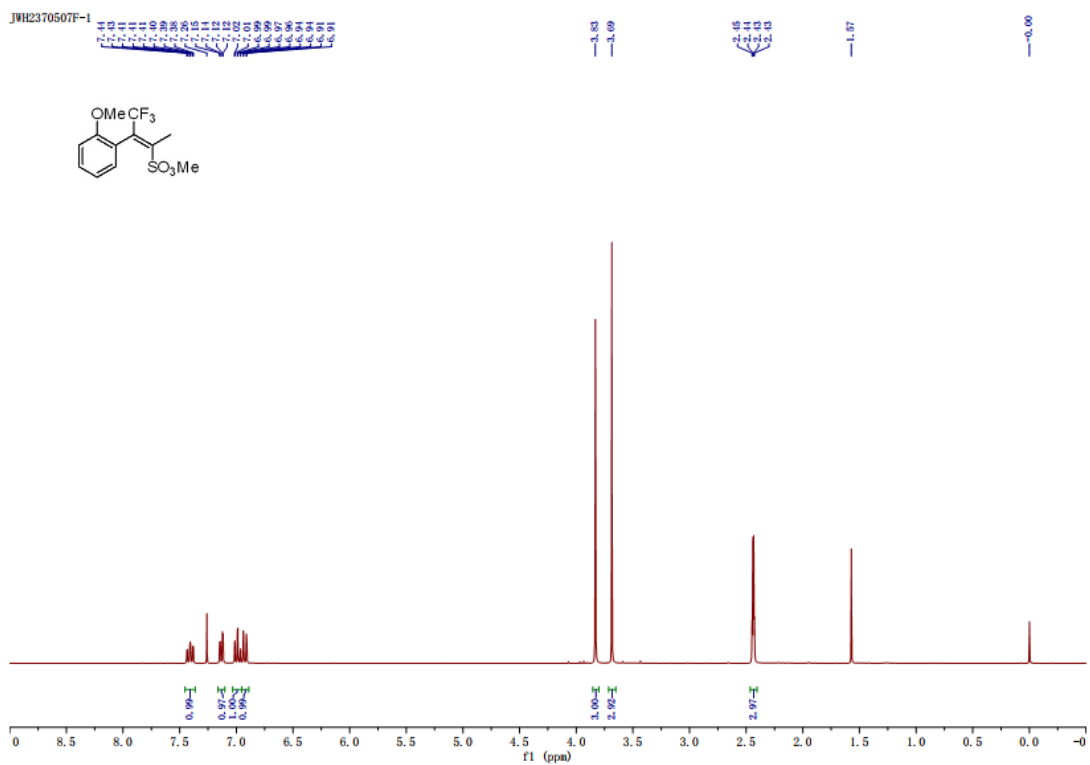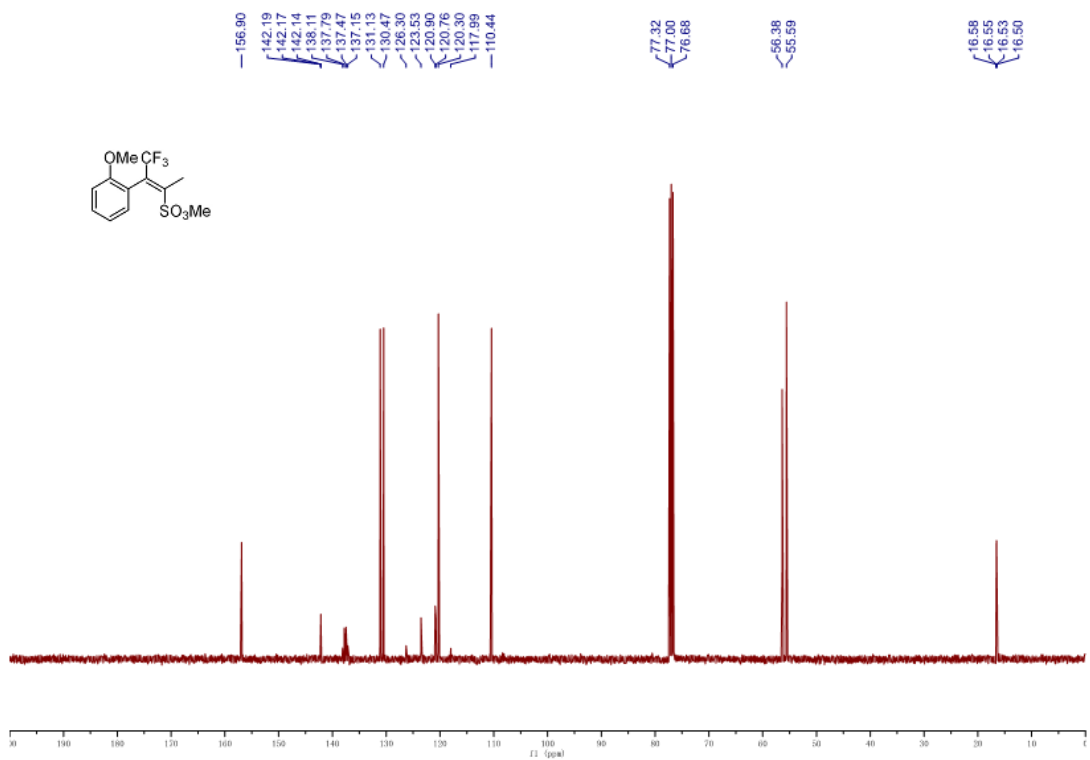

JWH2370507F-1

60.17  
60.18  
60.19

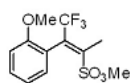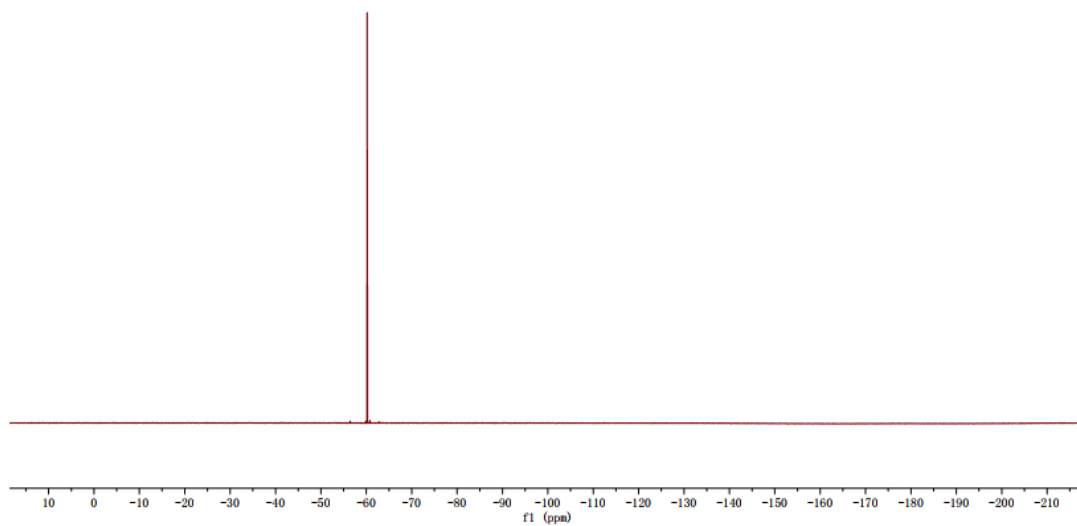

JWH2370507F-1

3.62

2.50  
2.49  
2.48

1.51

0.00

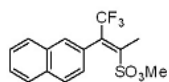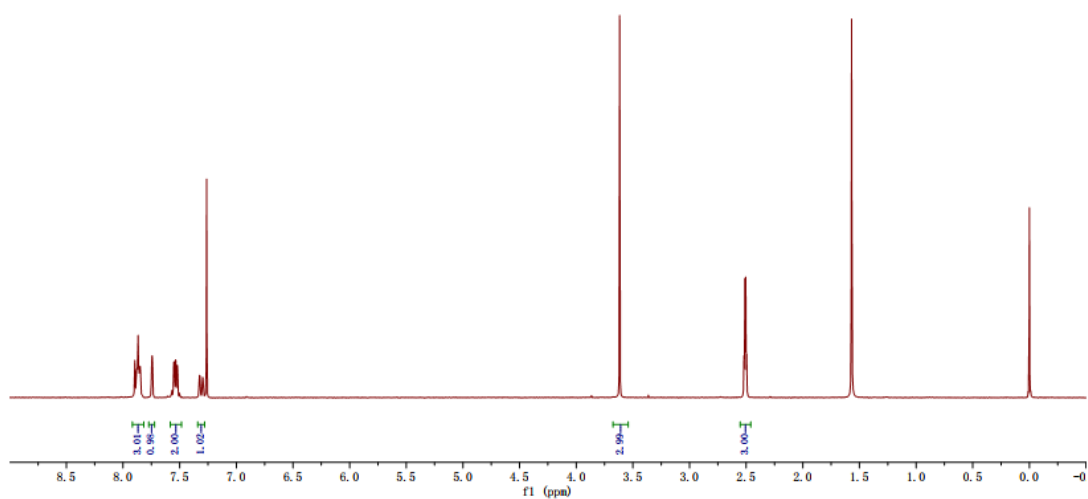

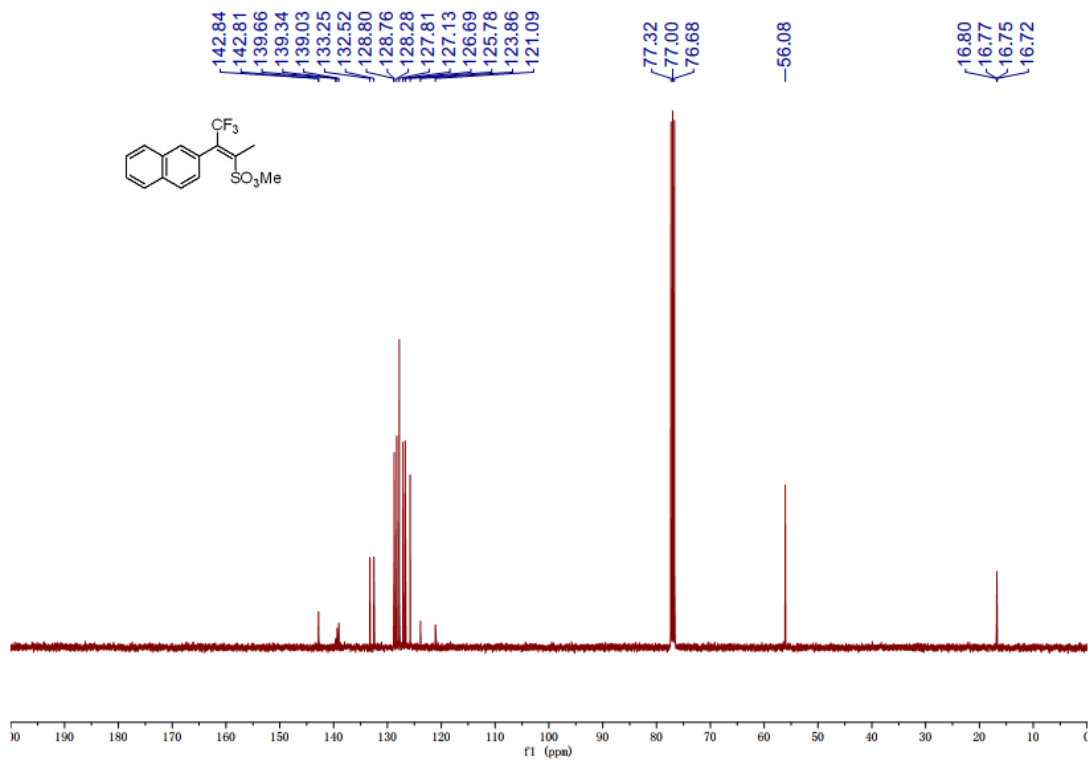

JWH2370504A-01

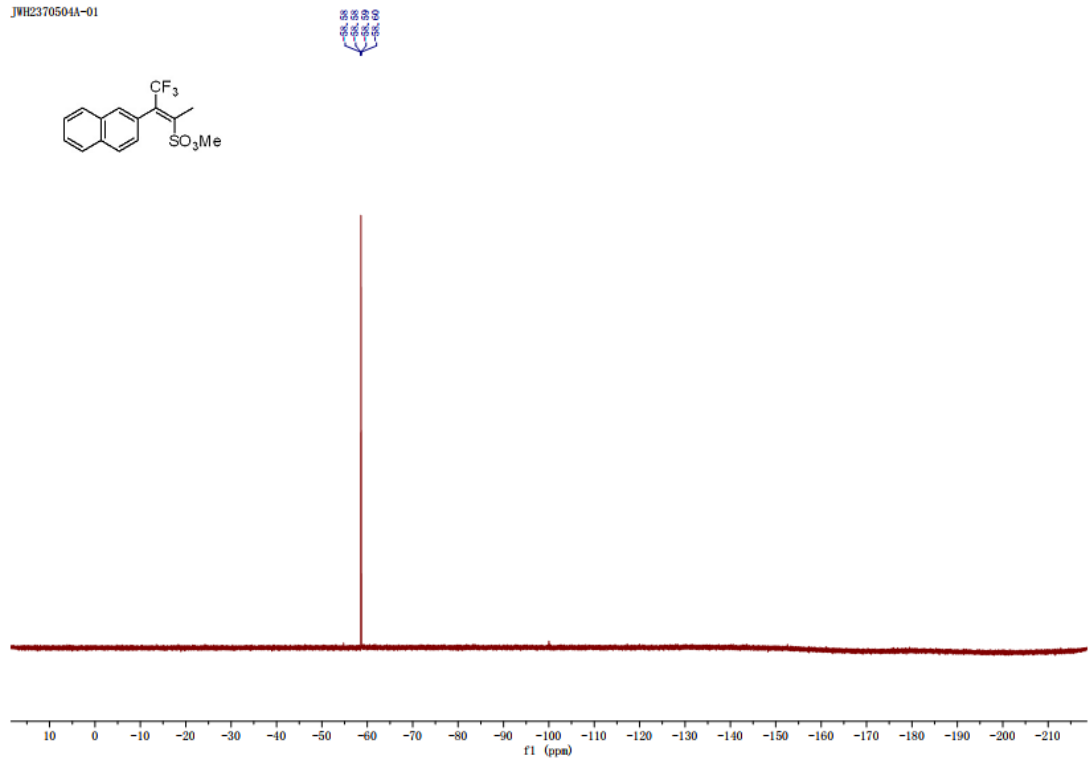

JWH2370505B-01

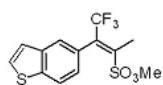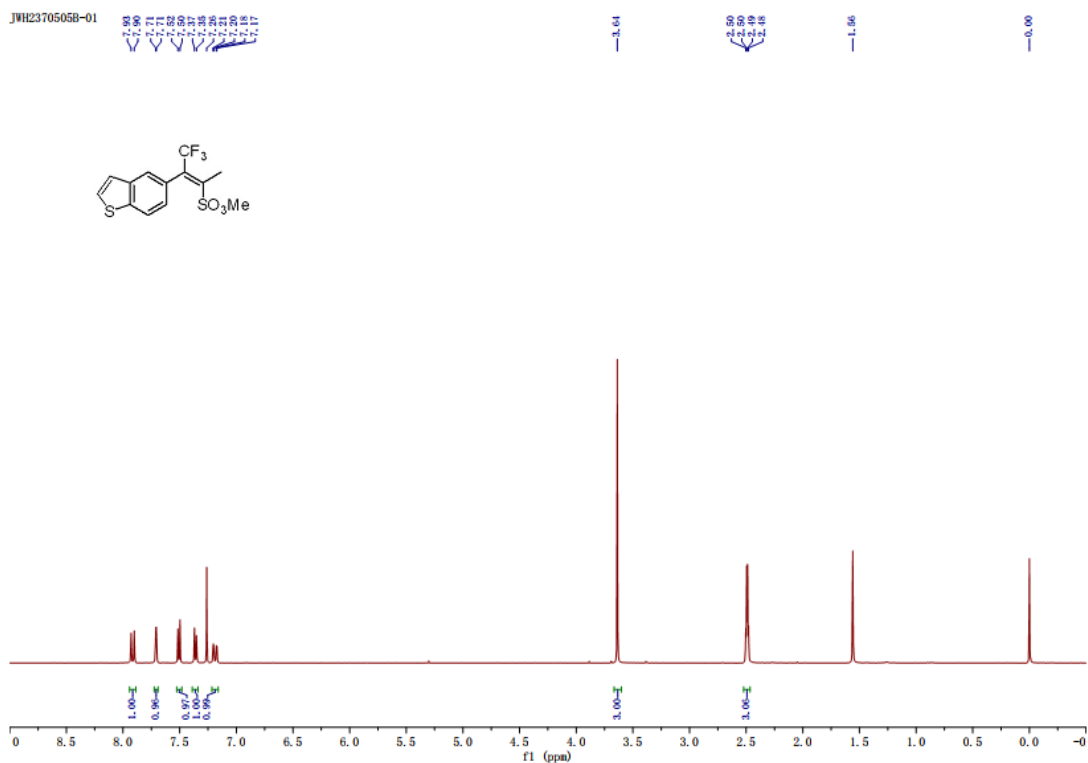

3ac-C.2.fid

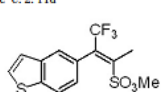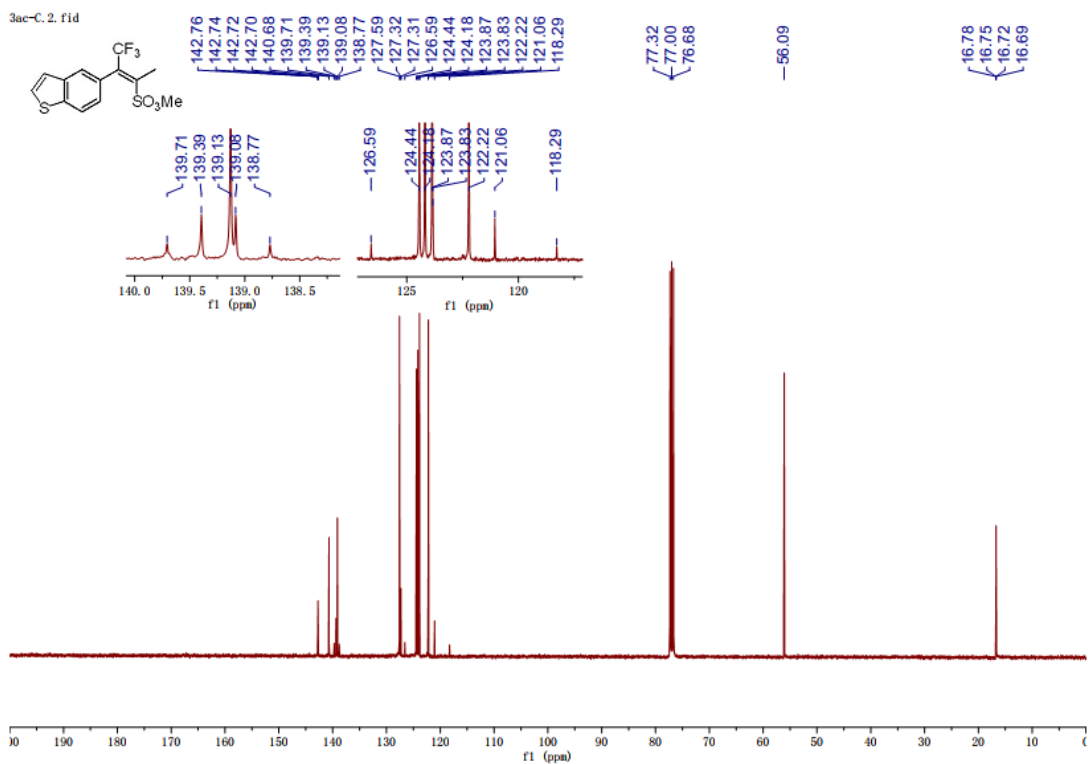

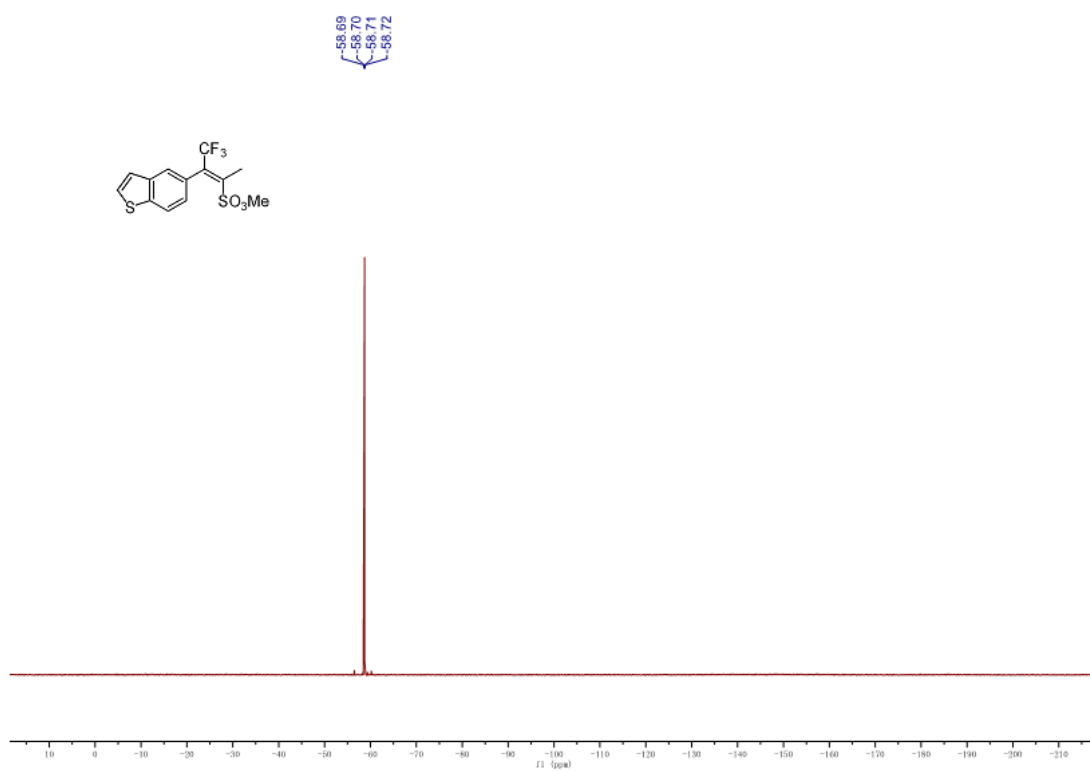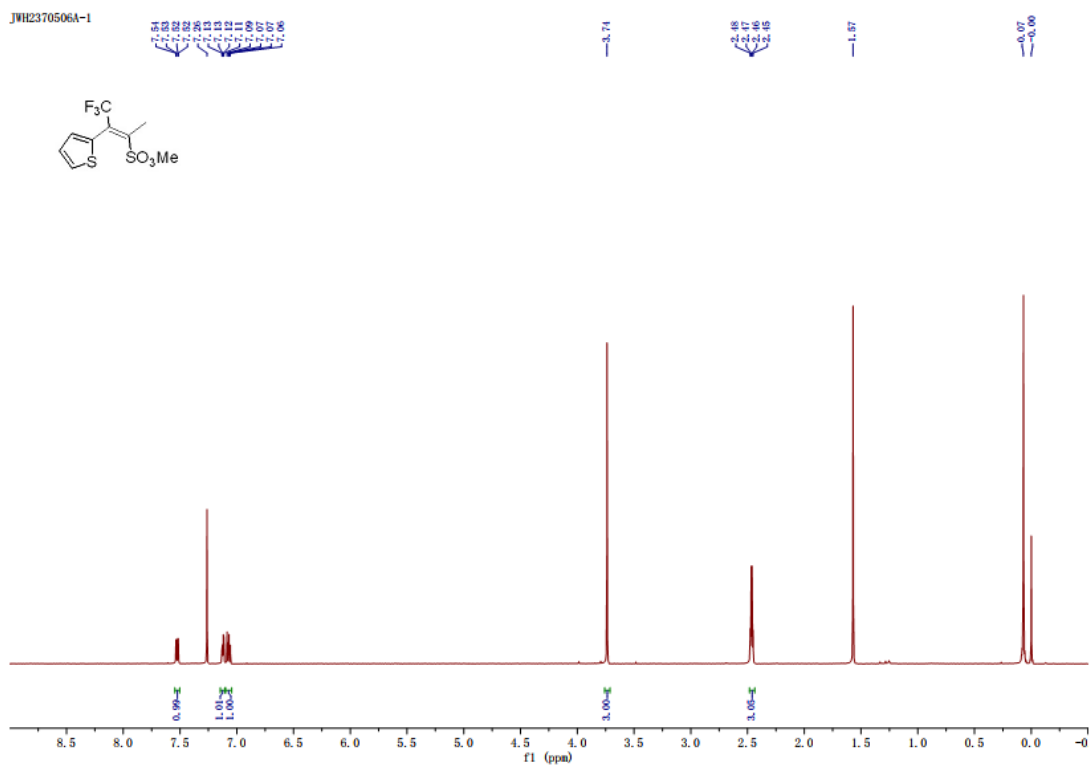

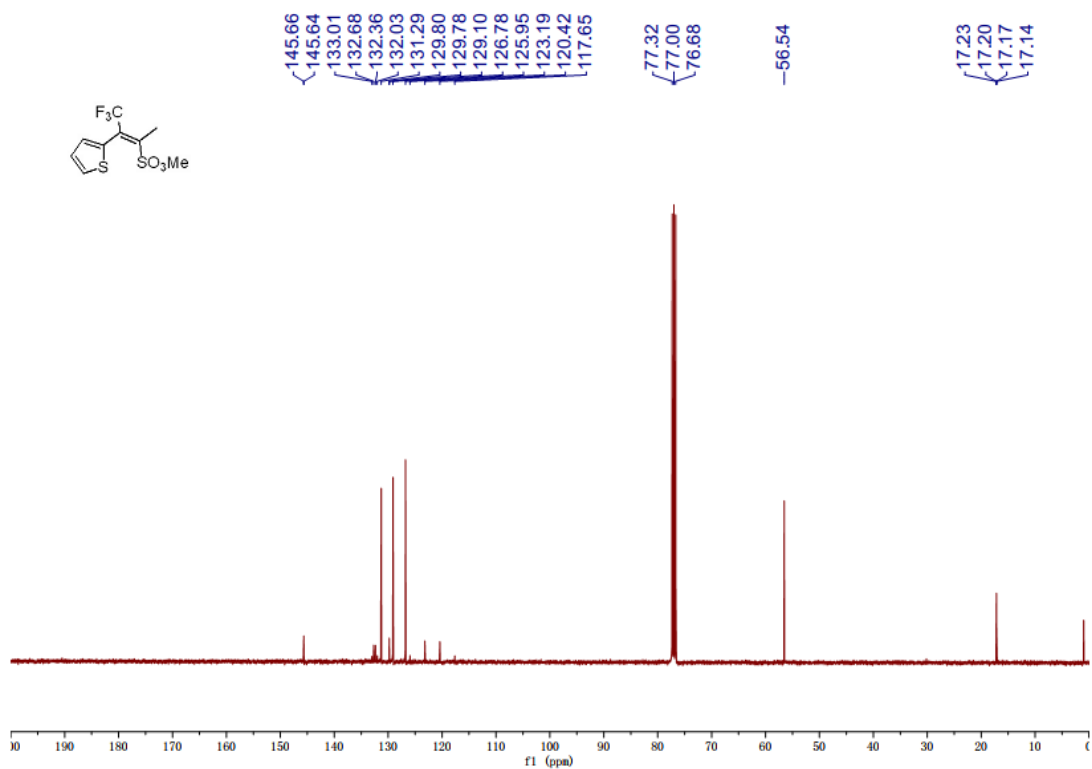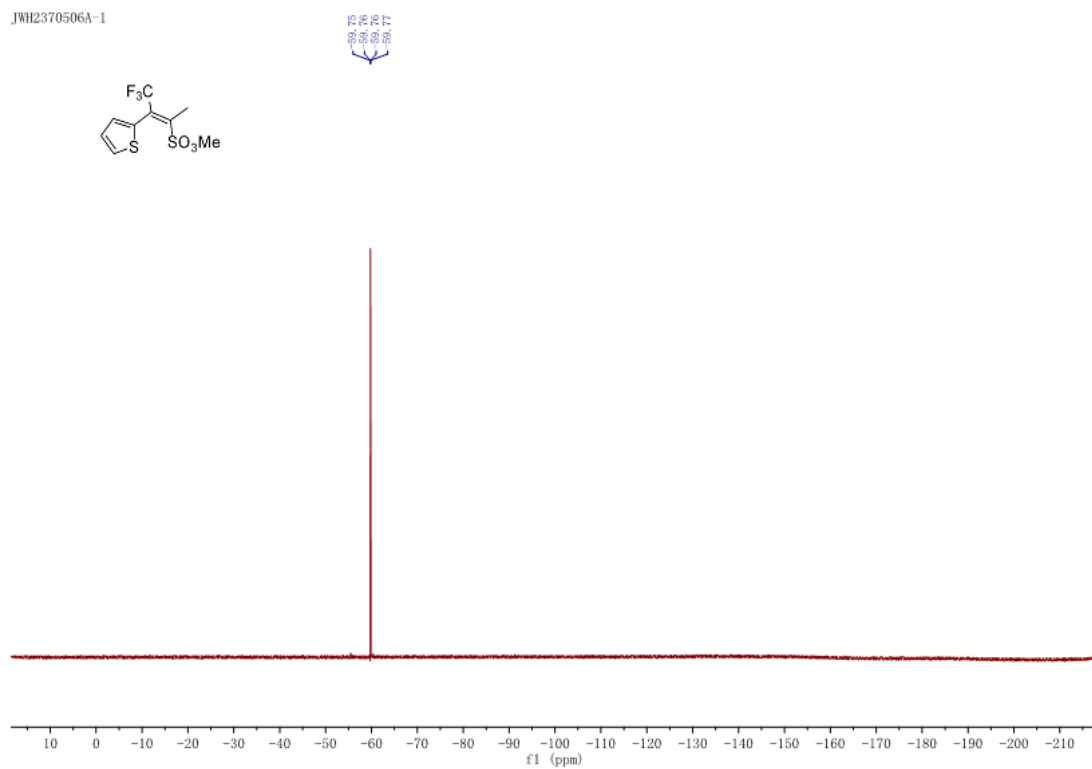

JWH2370506B-01

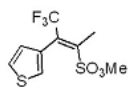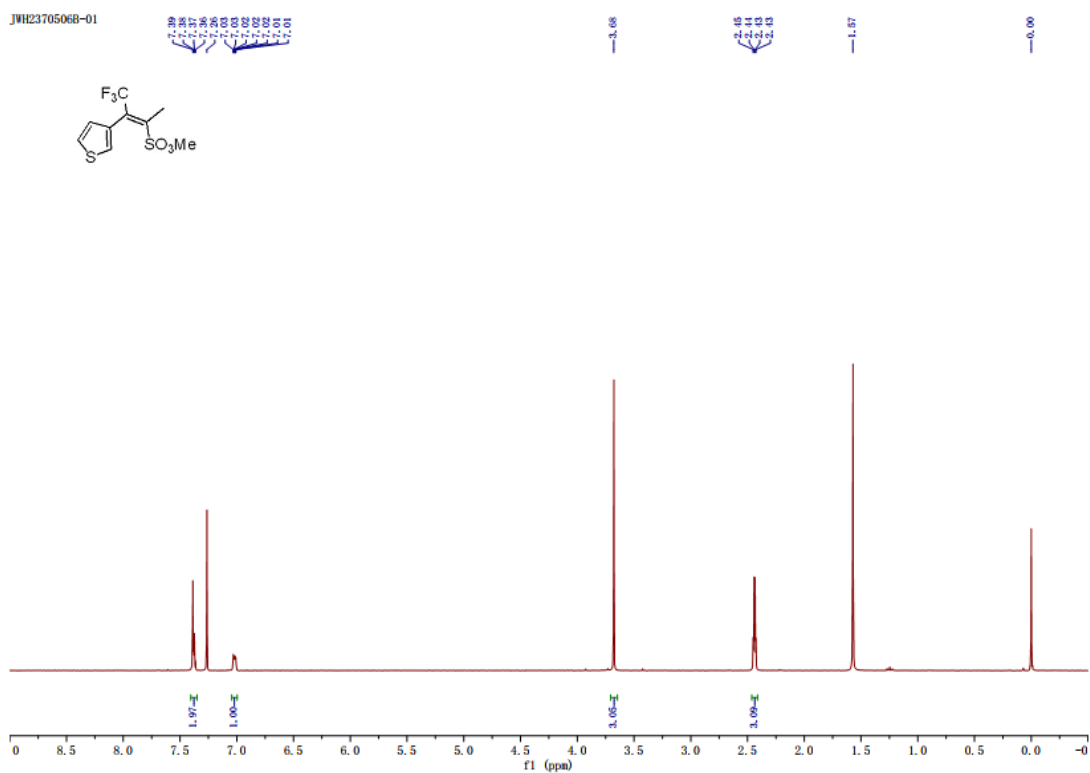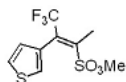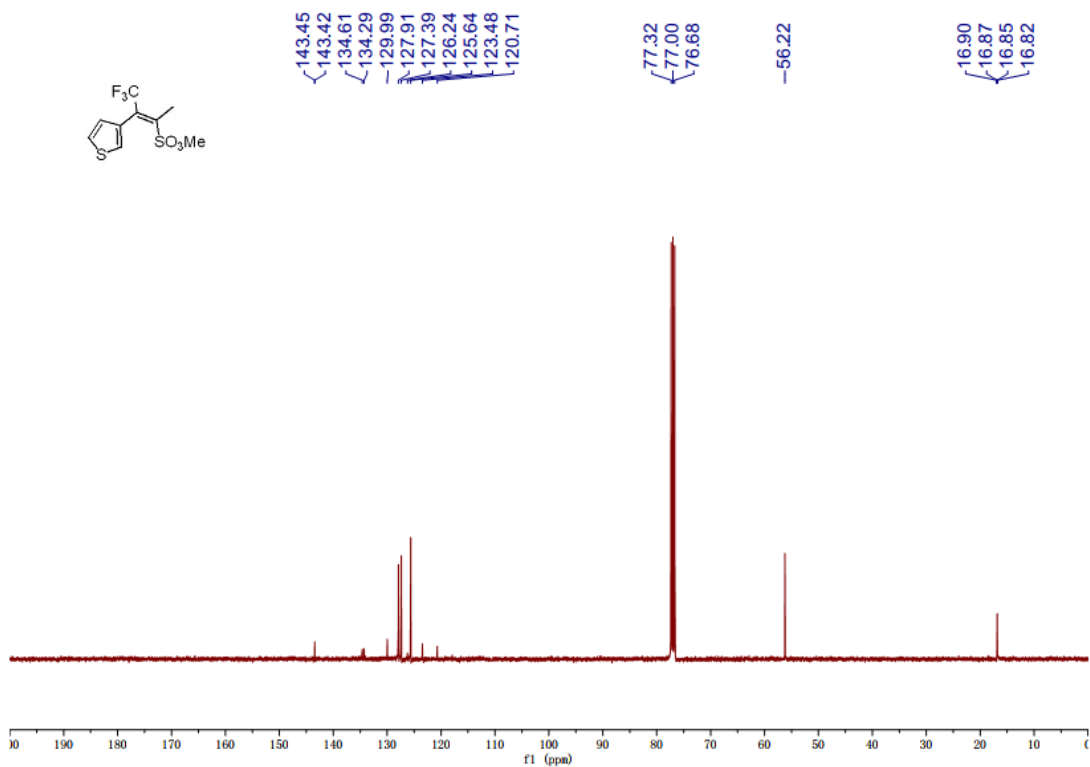

JWH2370506B-01

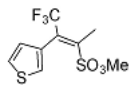

59.57  
59.58  
59.59  
59.60

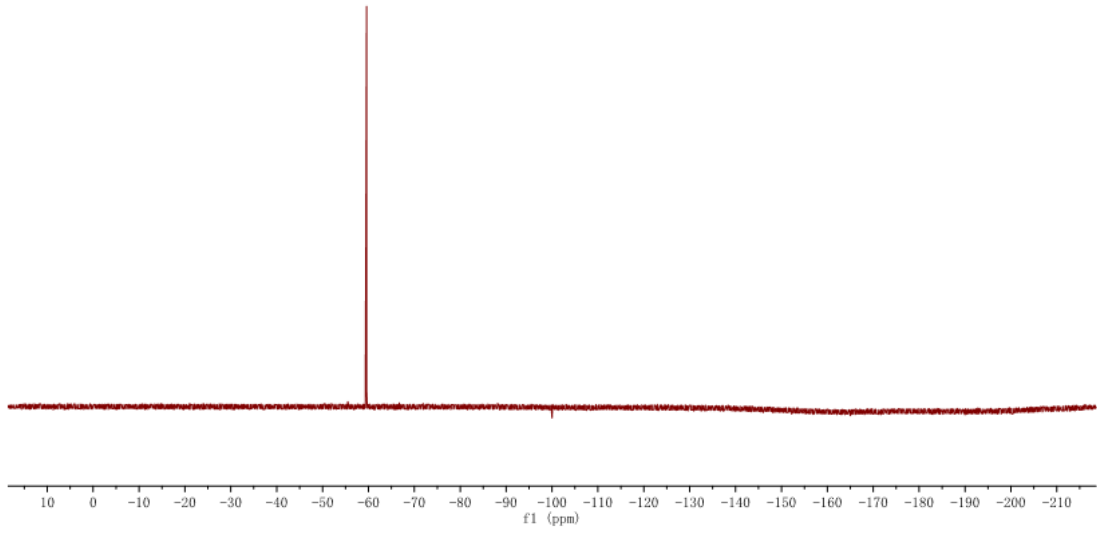

WXH2370605G-01. 1. f1d

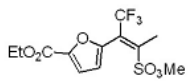

7.26  
7.21  
7.20

6.66  
6.65

4.40

4.38

4.35

4.33

3.91

3.90

2.48

2.47

2.47

2.46

1.60

1.40

1.37

1.35

--0.00

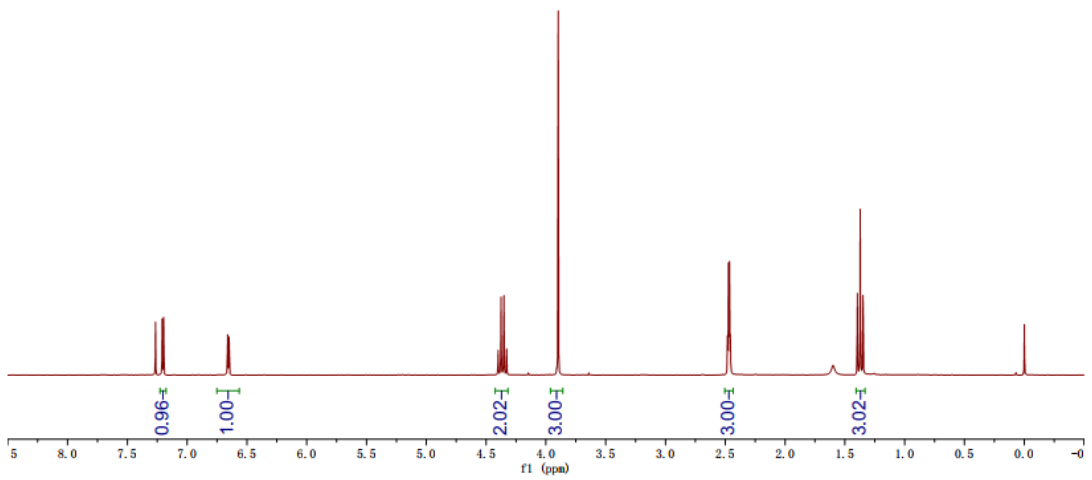



WB2370695-01.2.fid

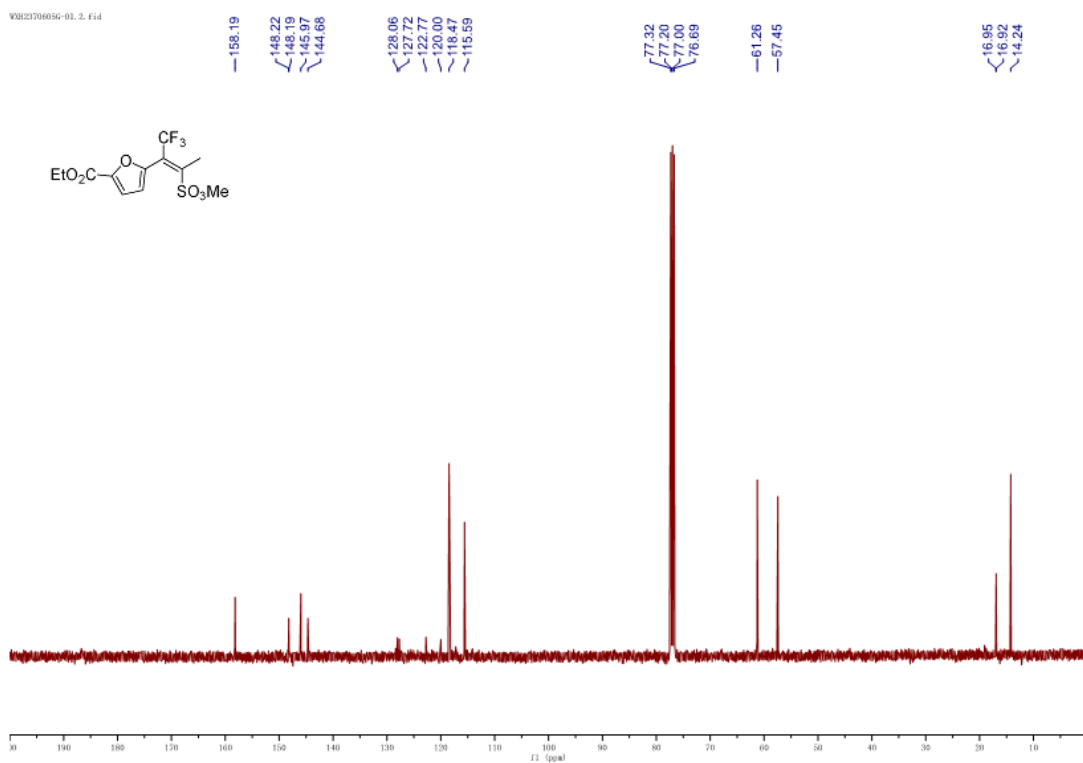

WB2370695C-01.3.fid

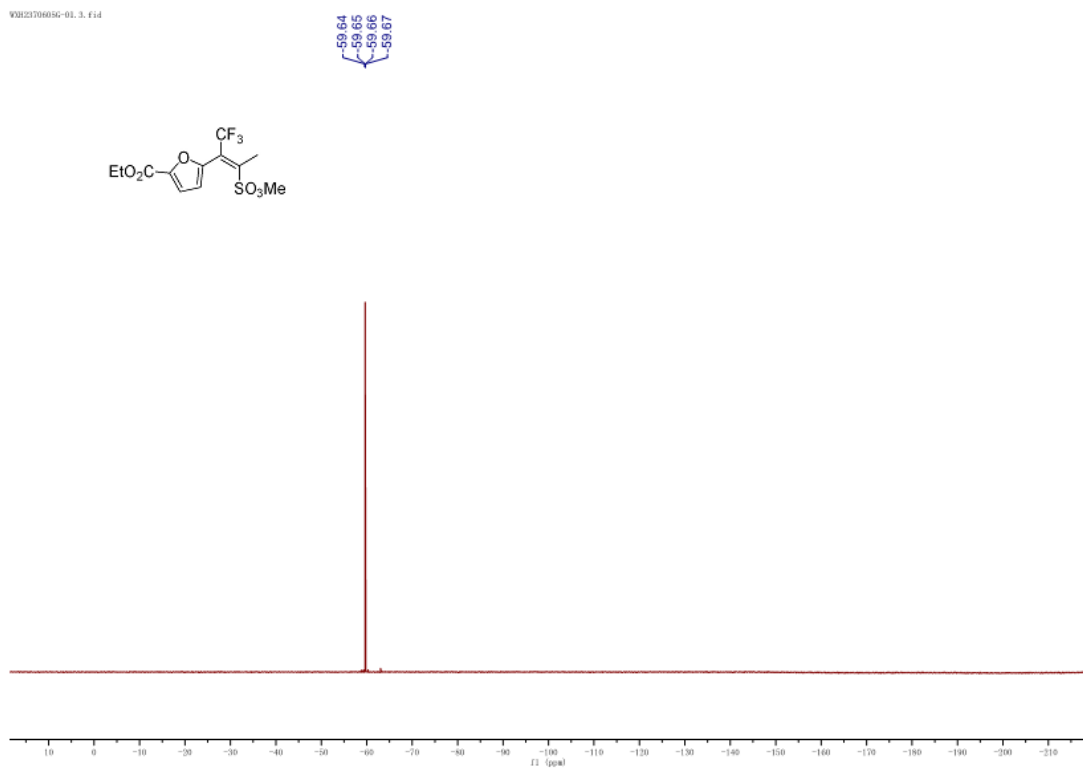

JWH2370514D-1

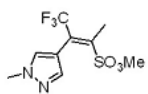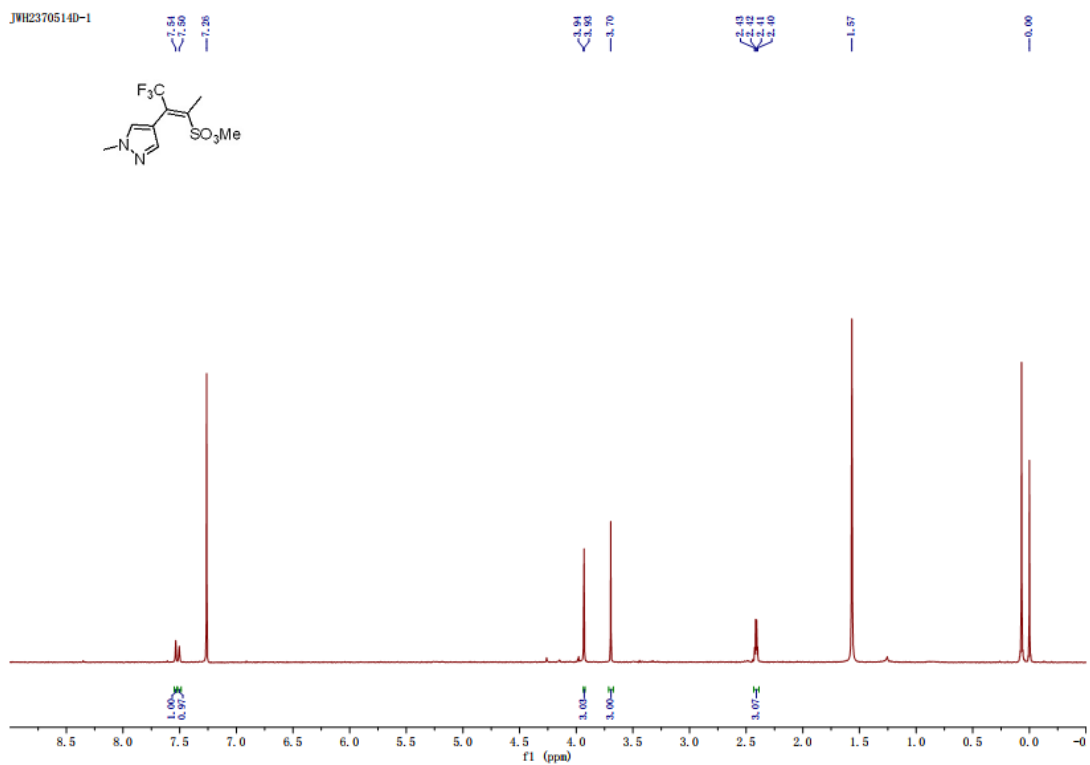

JWH2370506D-1

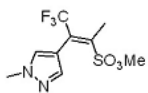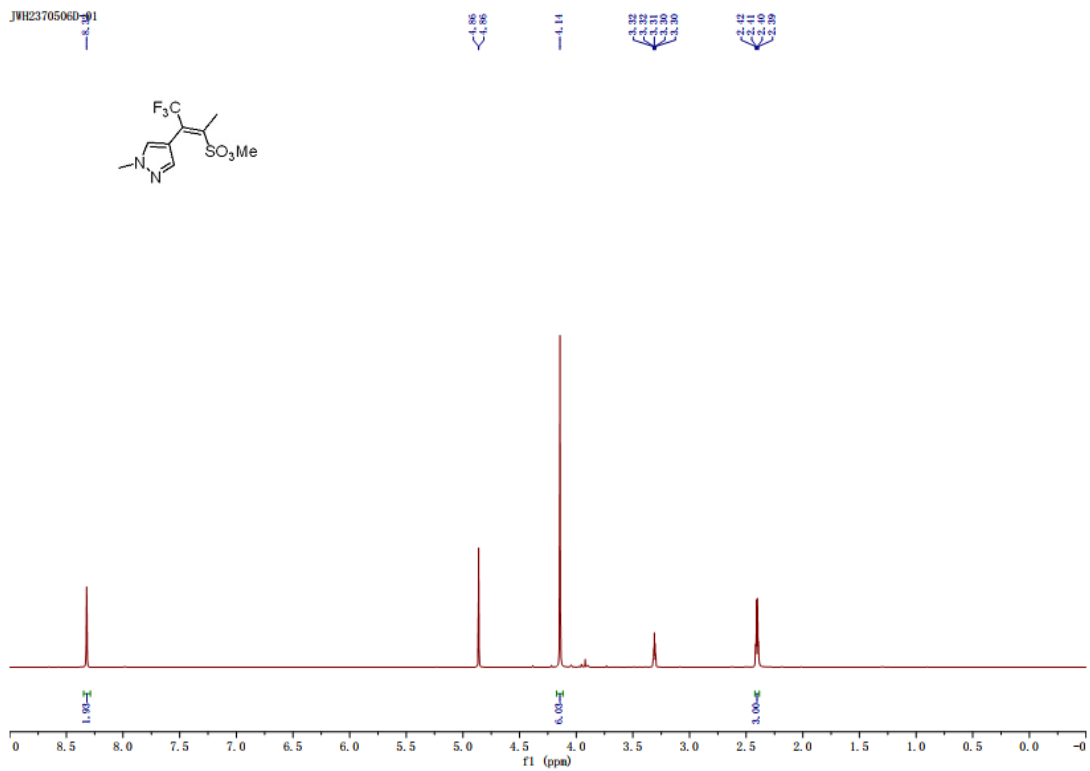

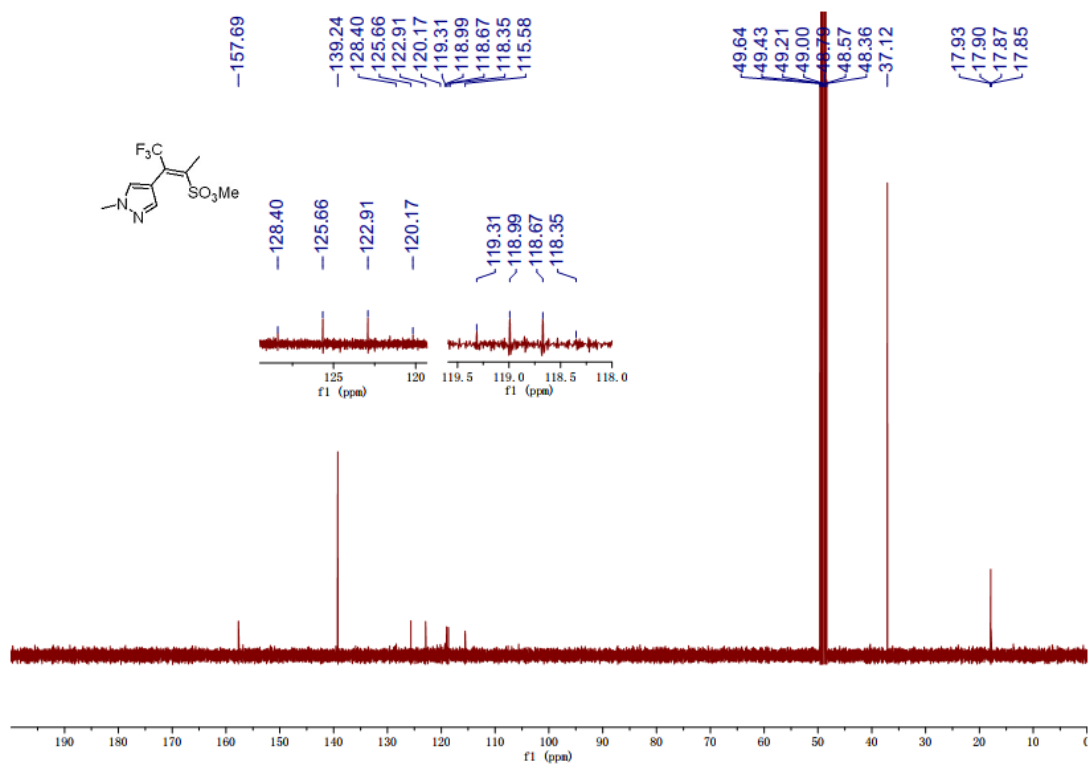

JWH2370514D-1.3.fid

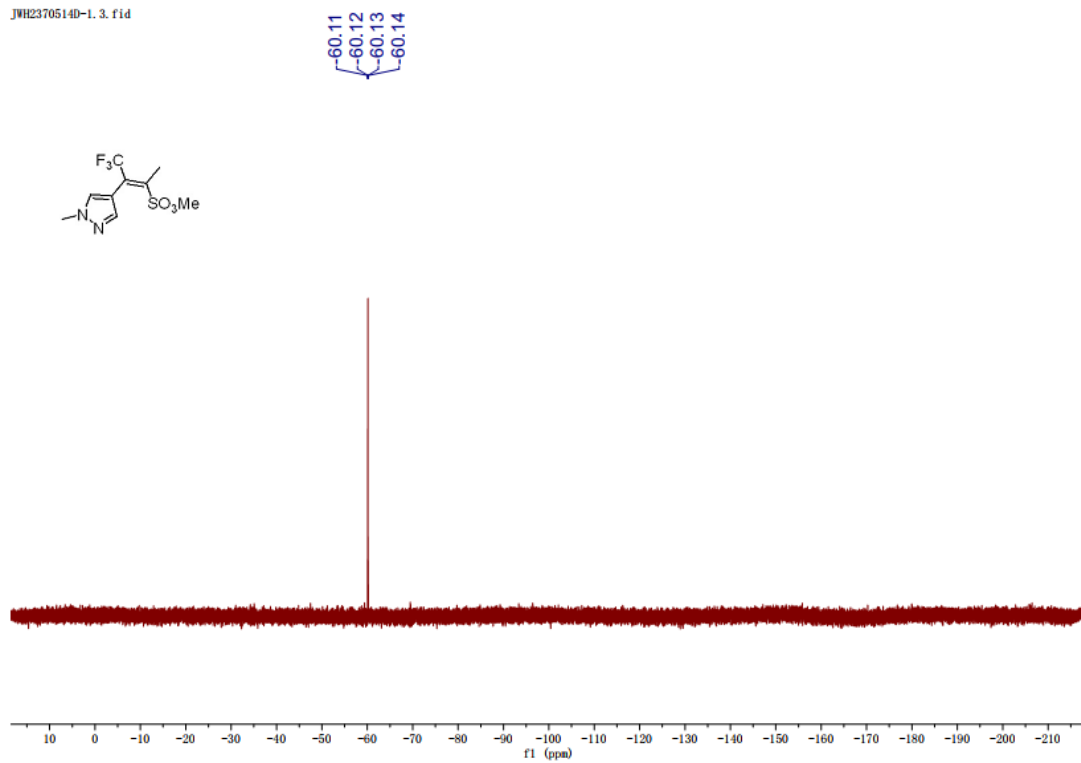

JWH2370505G-01

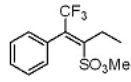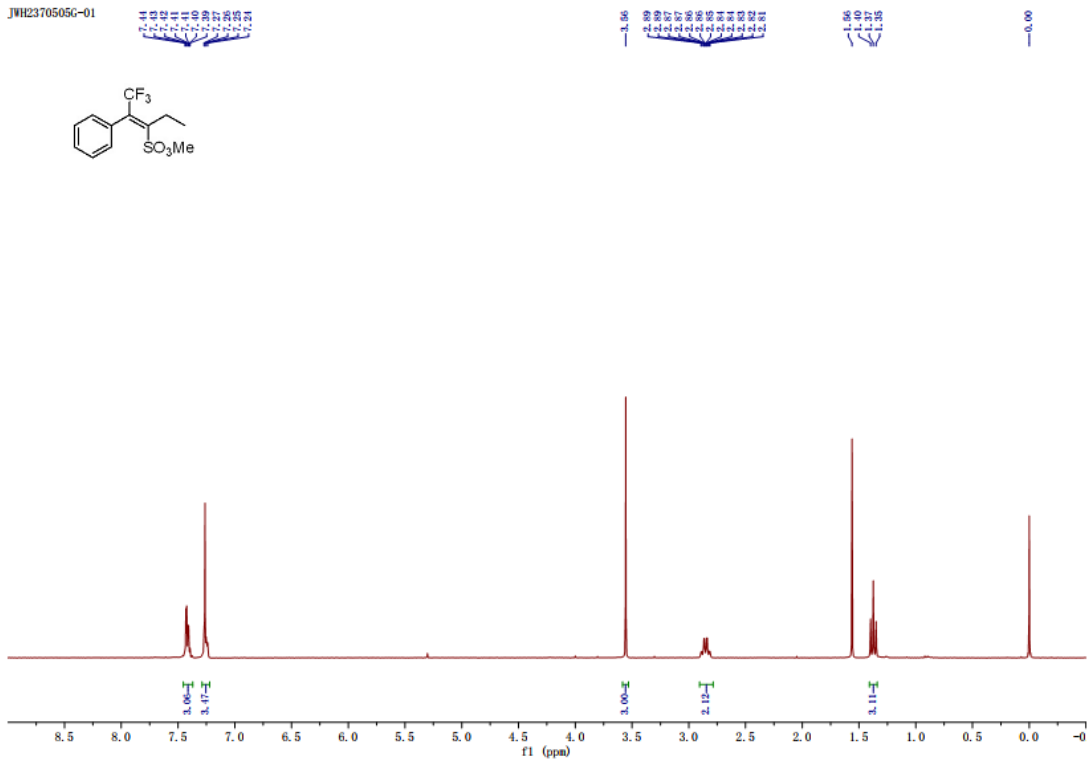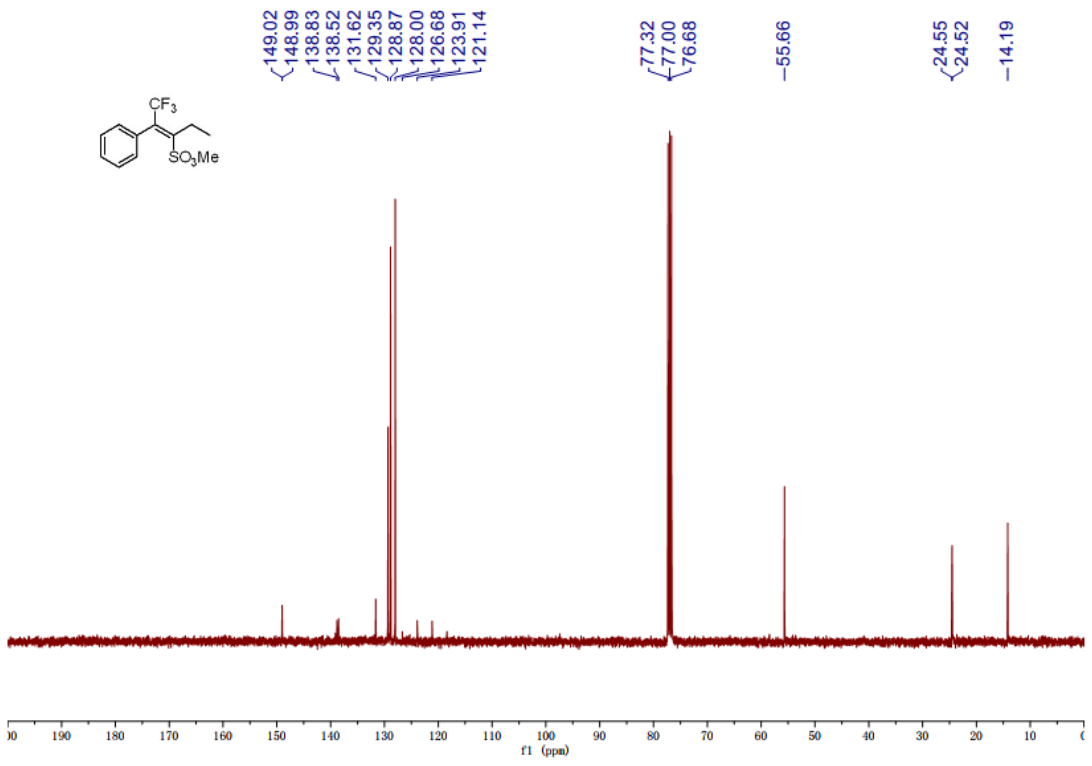

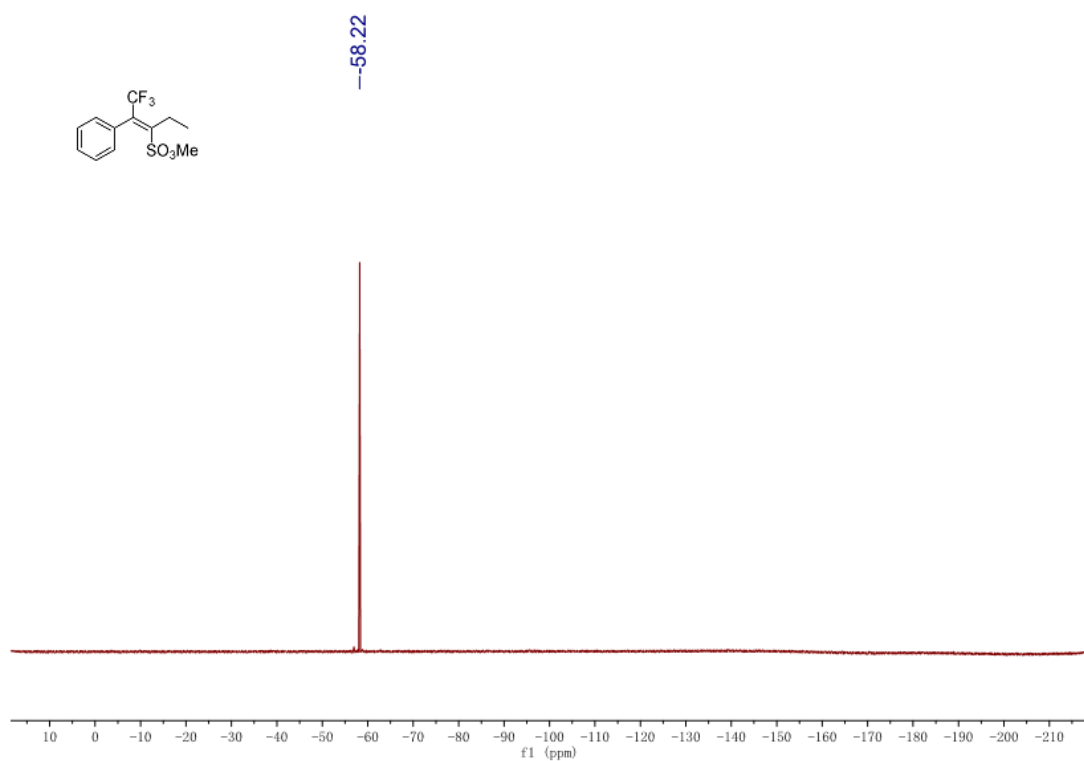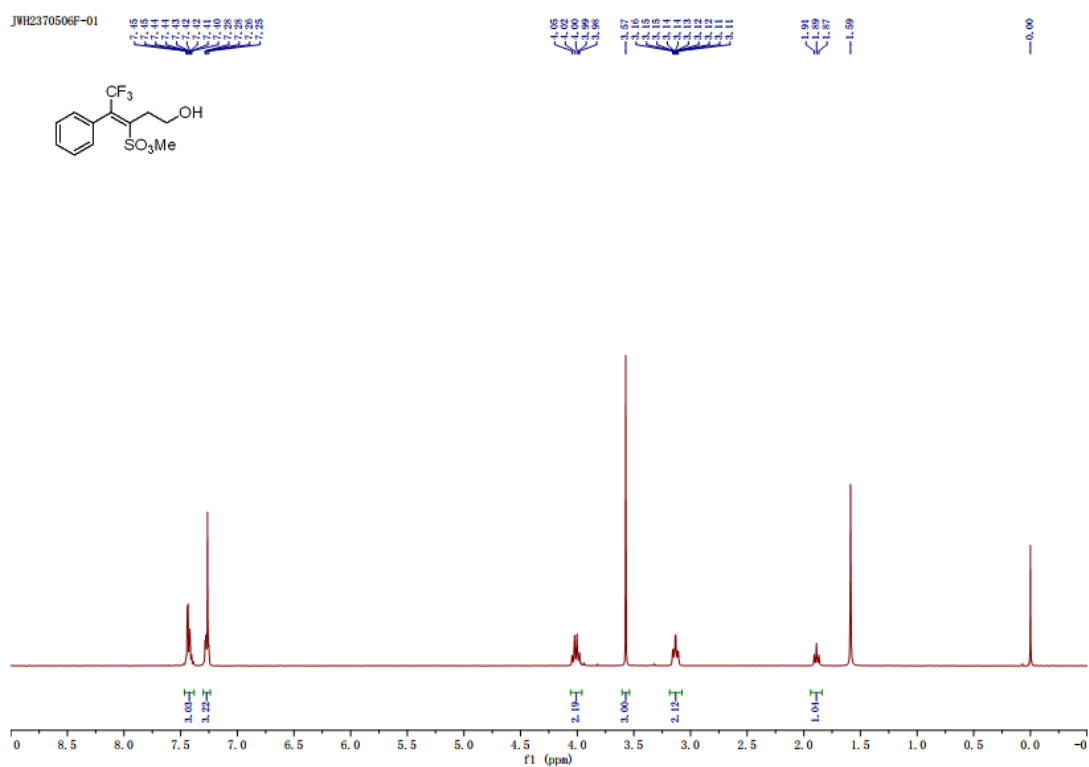

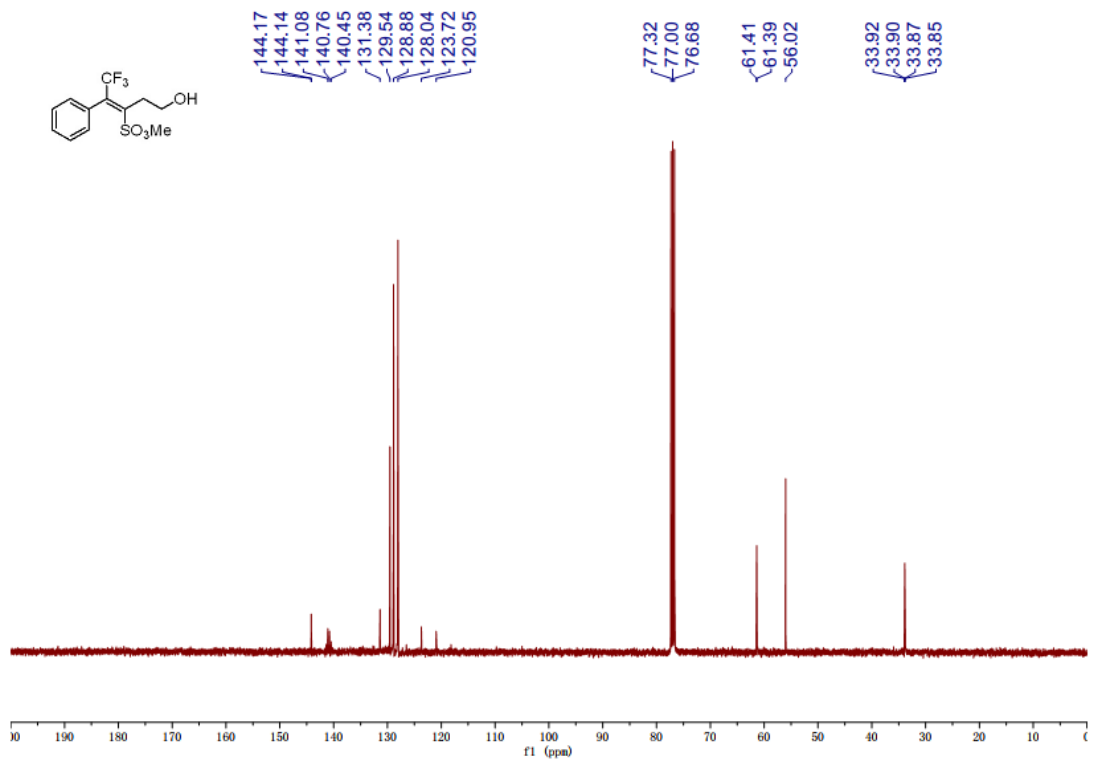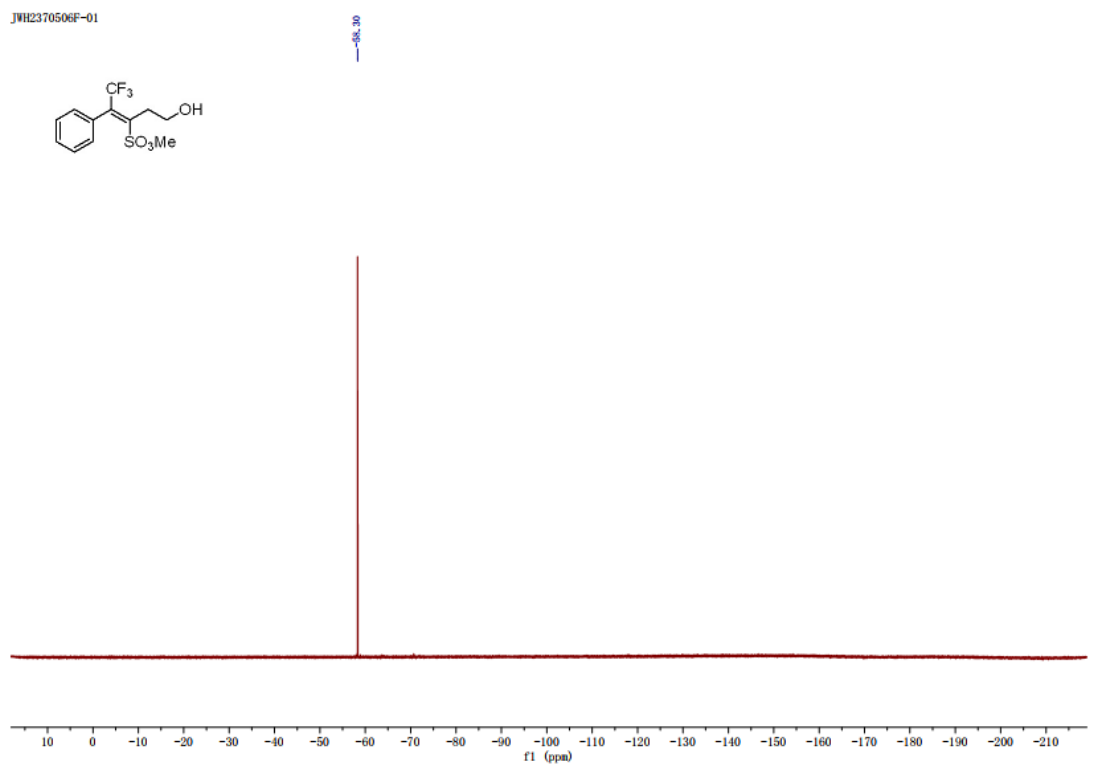

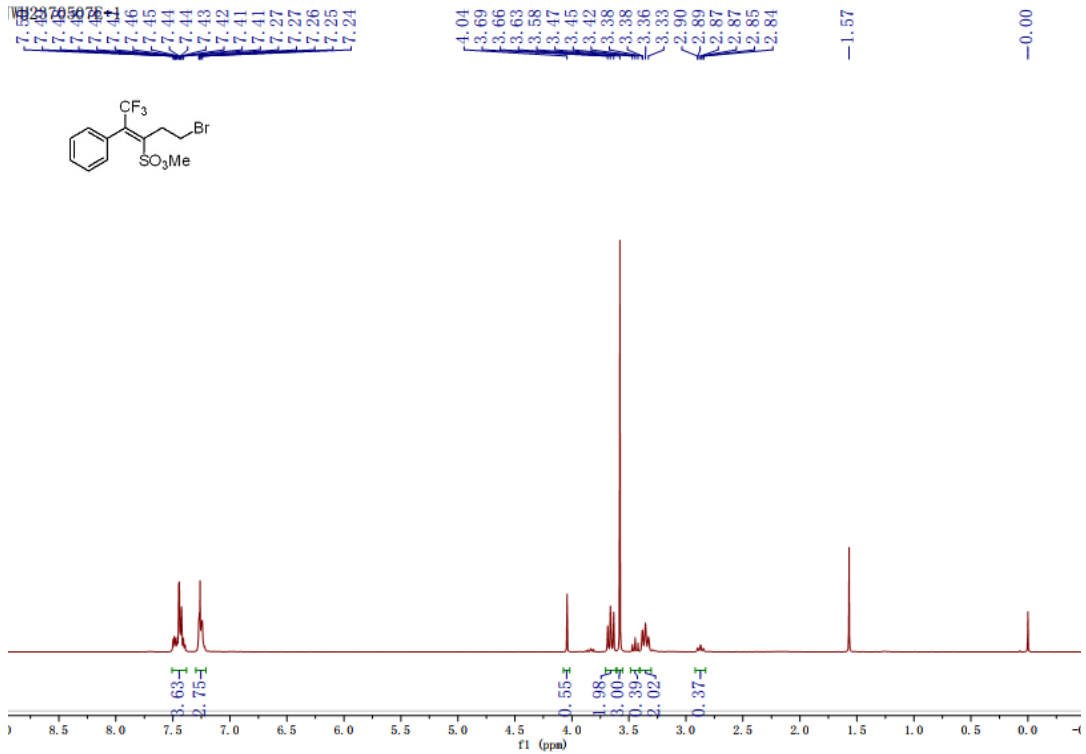

JWH2370507E-1.2.fid

**13C NMR spectrum** (ppm):

- 144.00, 143.98, 141.78, 141.46, 130.98, 129.79, 129.75, 129.07, 128.73, 128.12, 128.02, 123.51, 120.74, 117.97
- 77.32, 77.00, 76.68
- 56.76, 56.05
- 35.91, 33.94, 33.91, 33.88, 33.86, 28.02, 28.00, 27.98

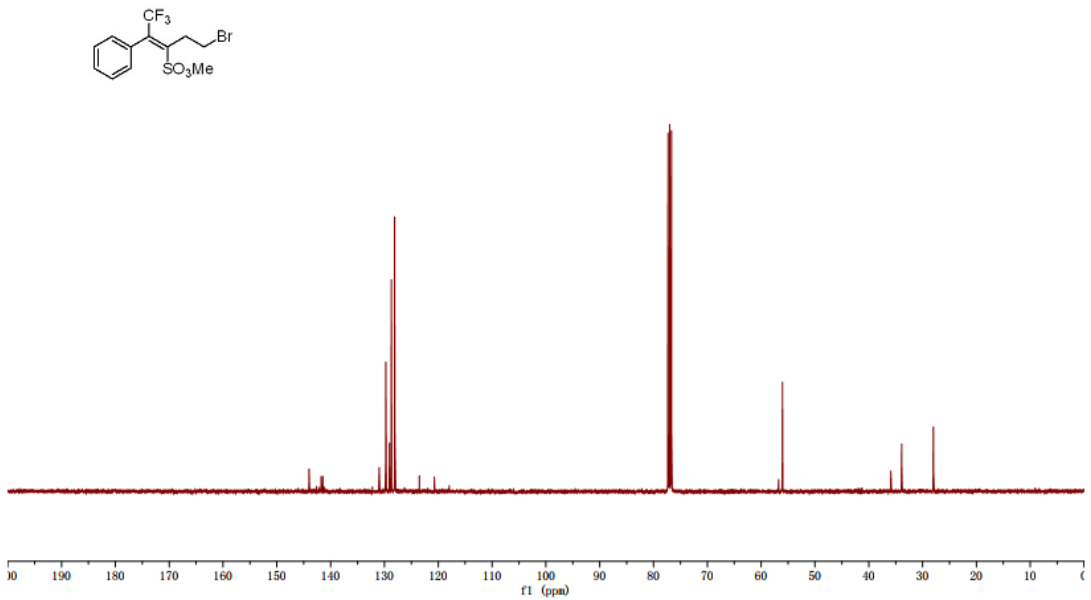

JWH2370507E-1

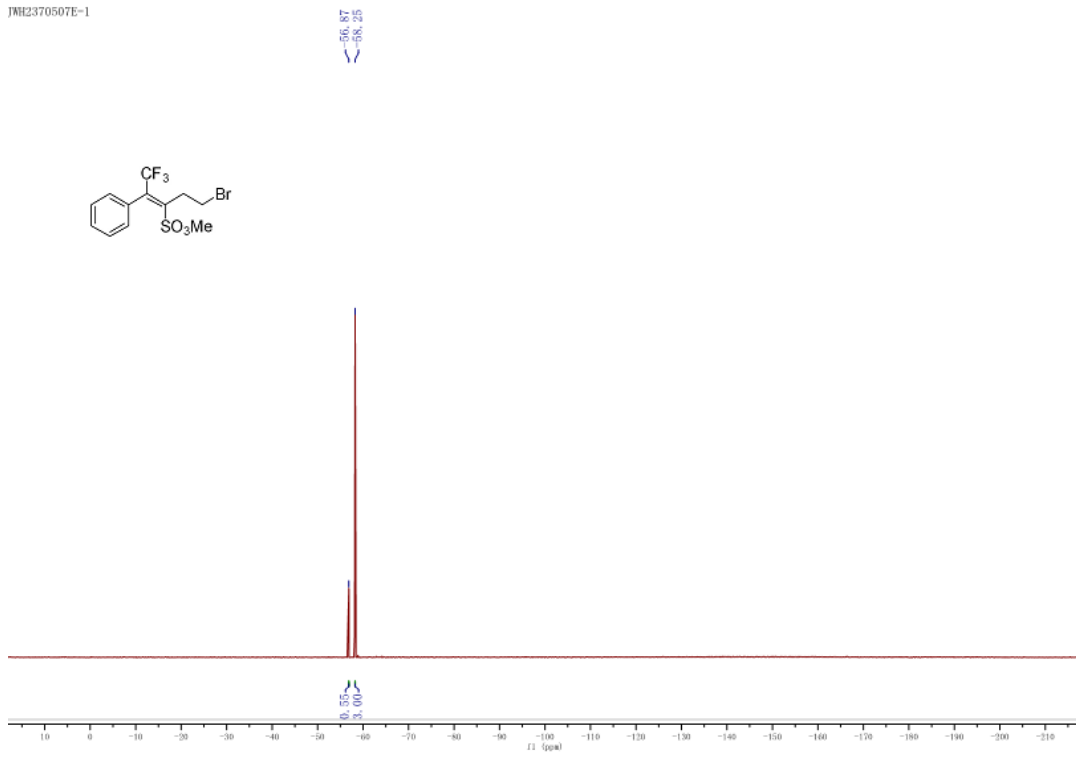

JWH2370505F

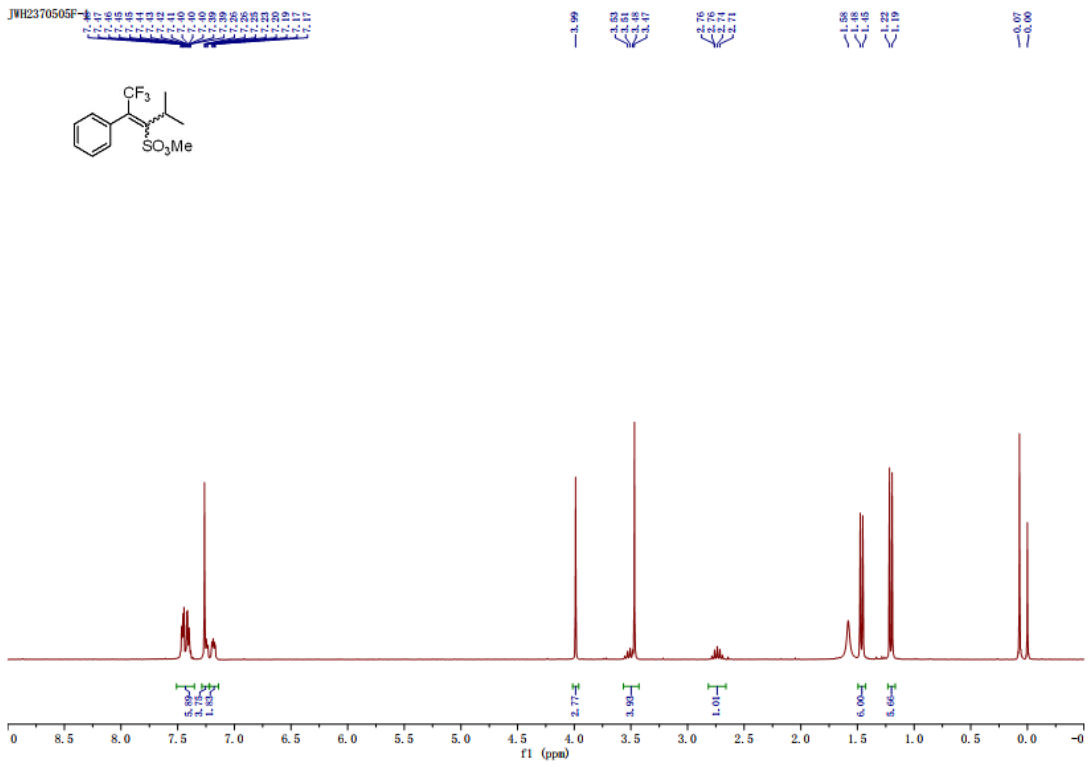



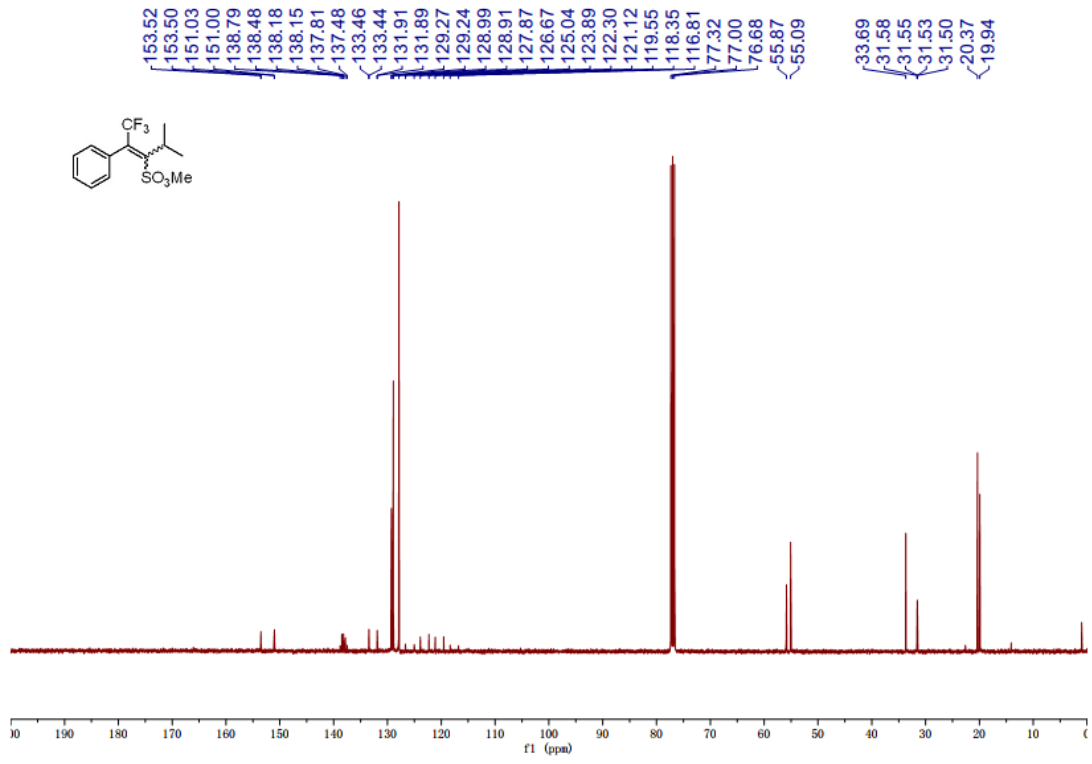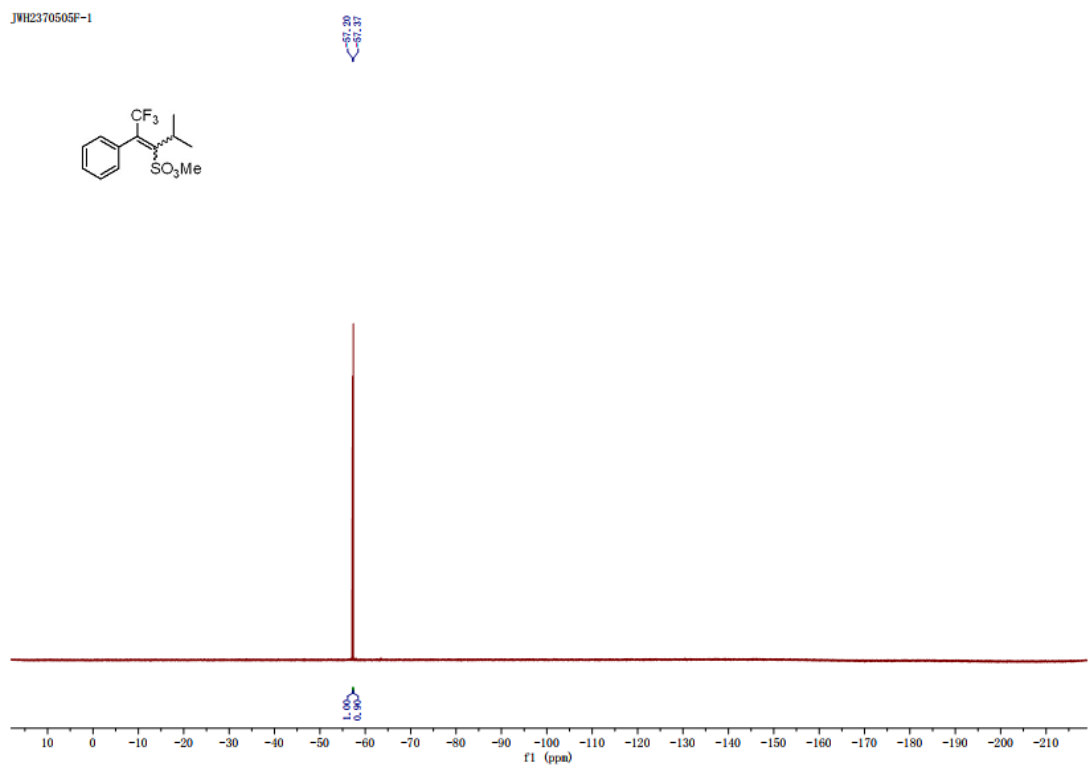

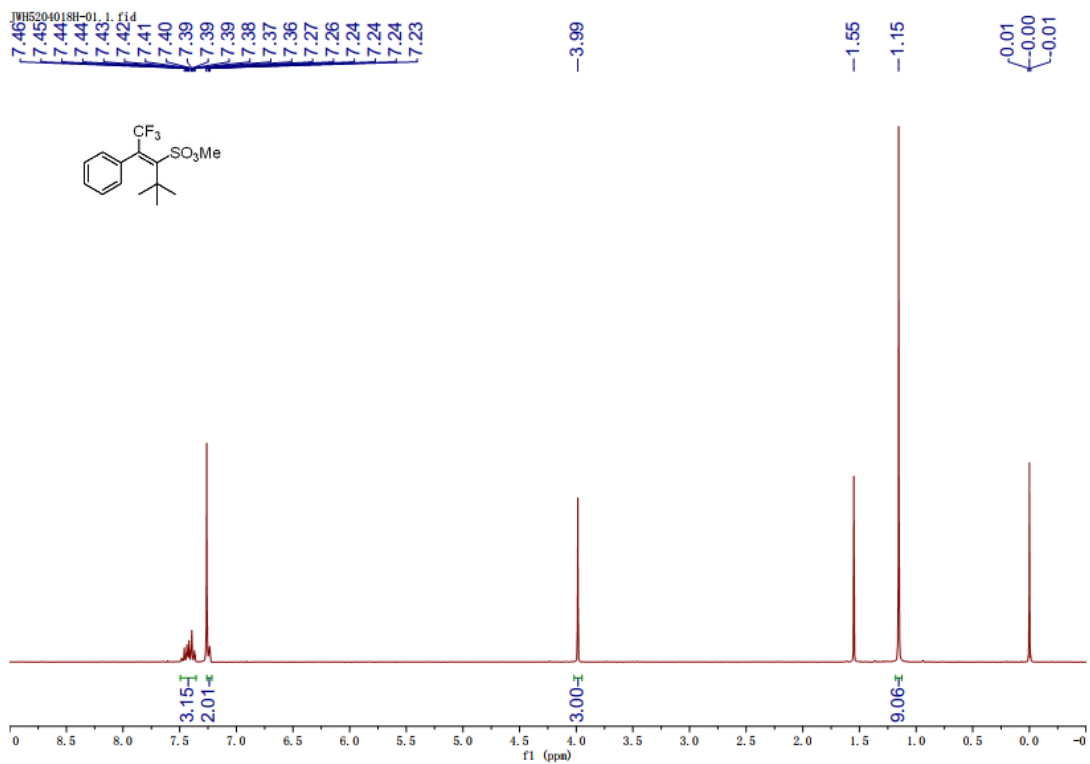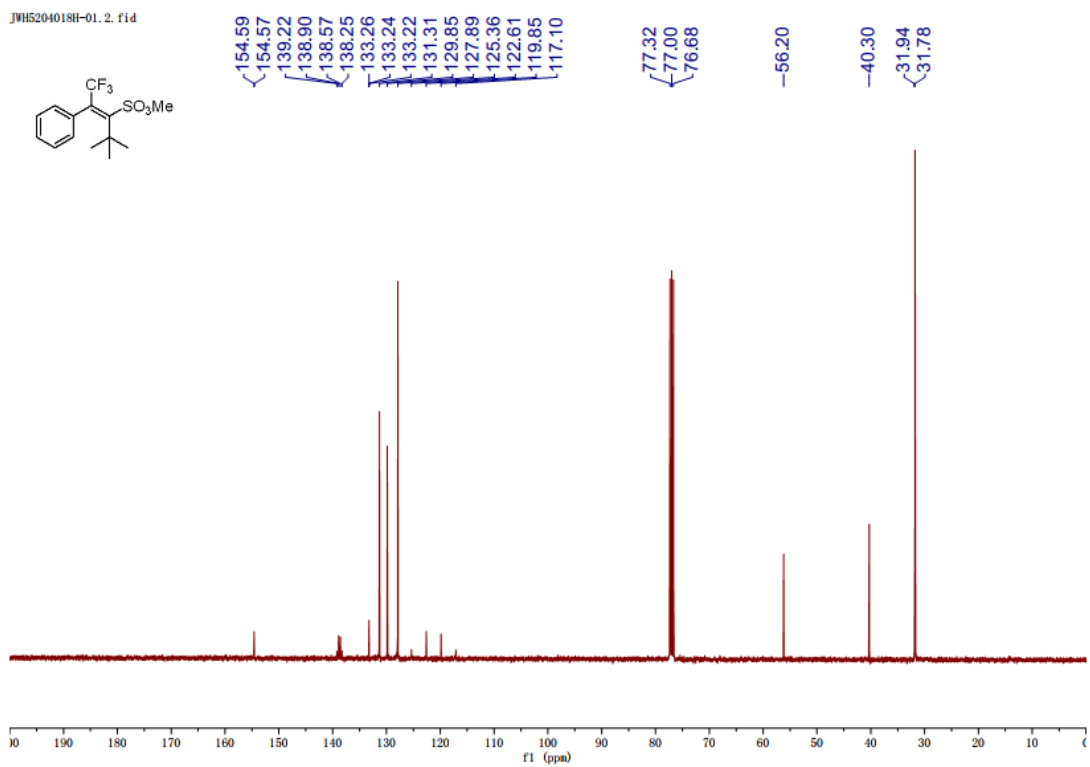

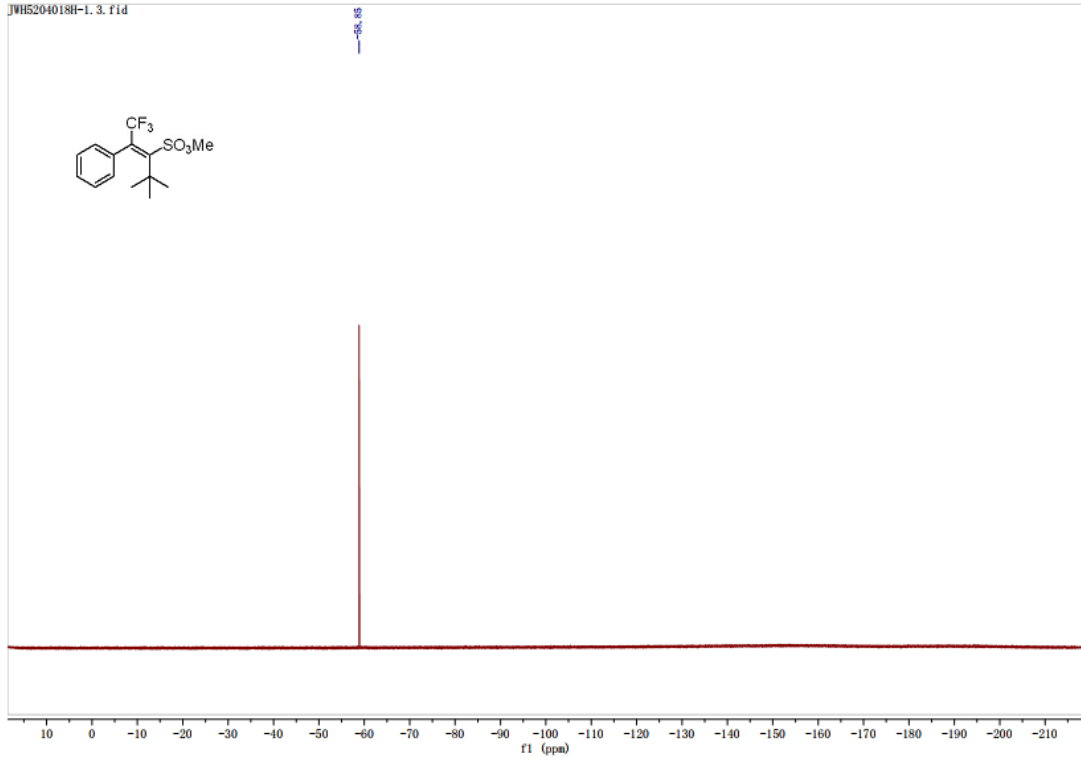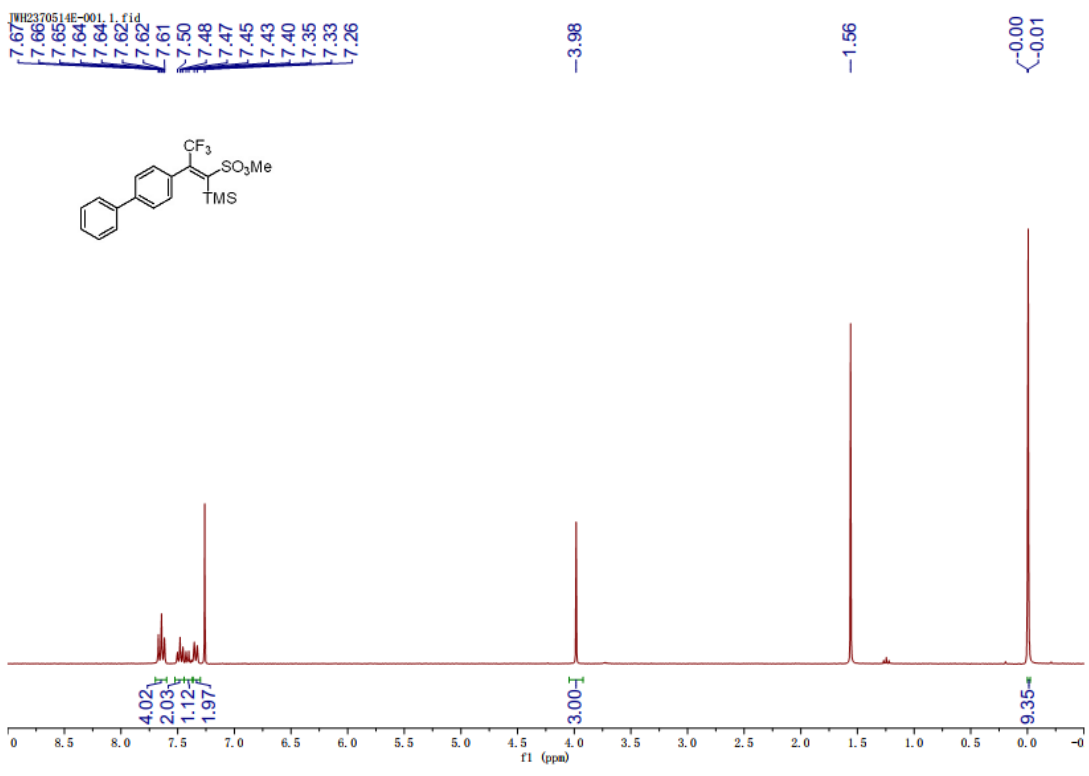

JWH2370514E-01. 2. fid

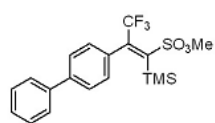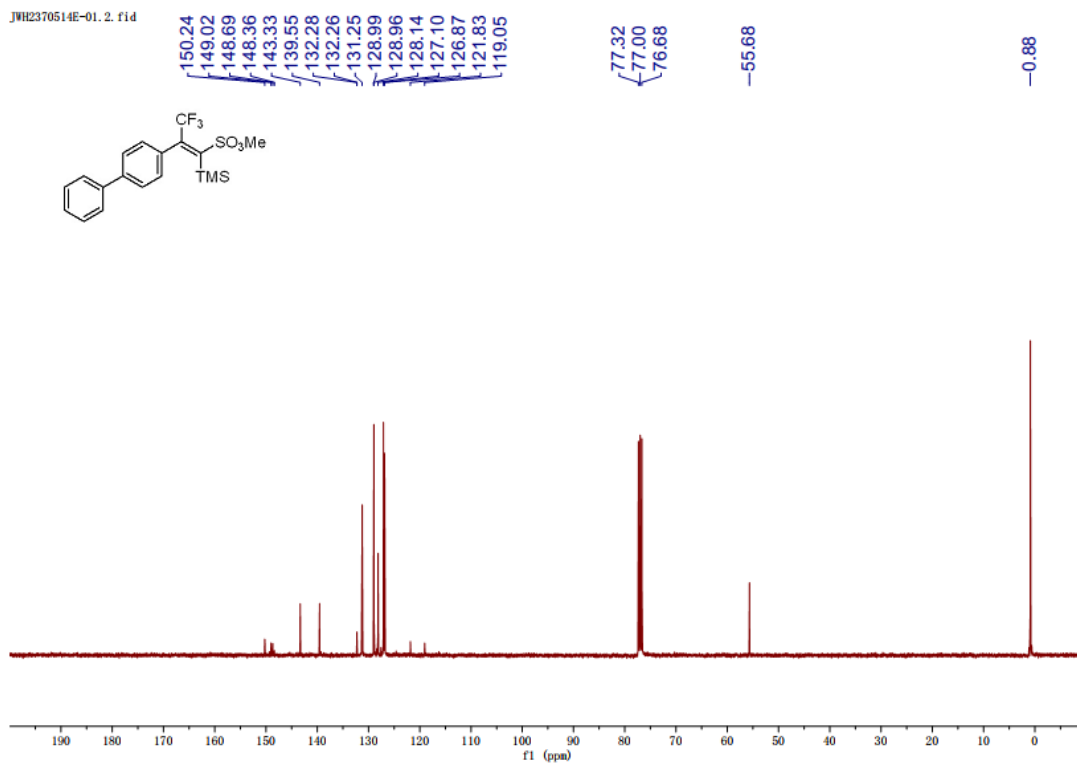

JWH2370514E-001. 3. fid

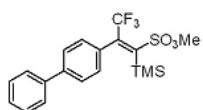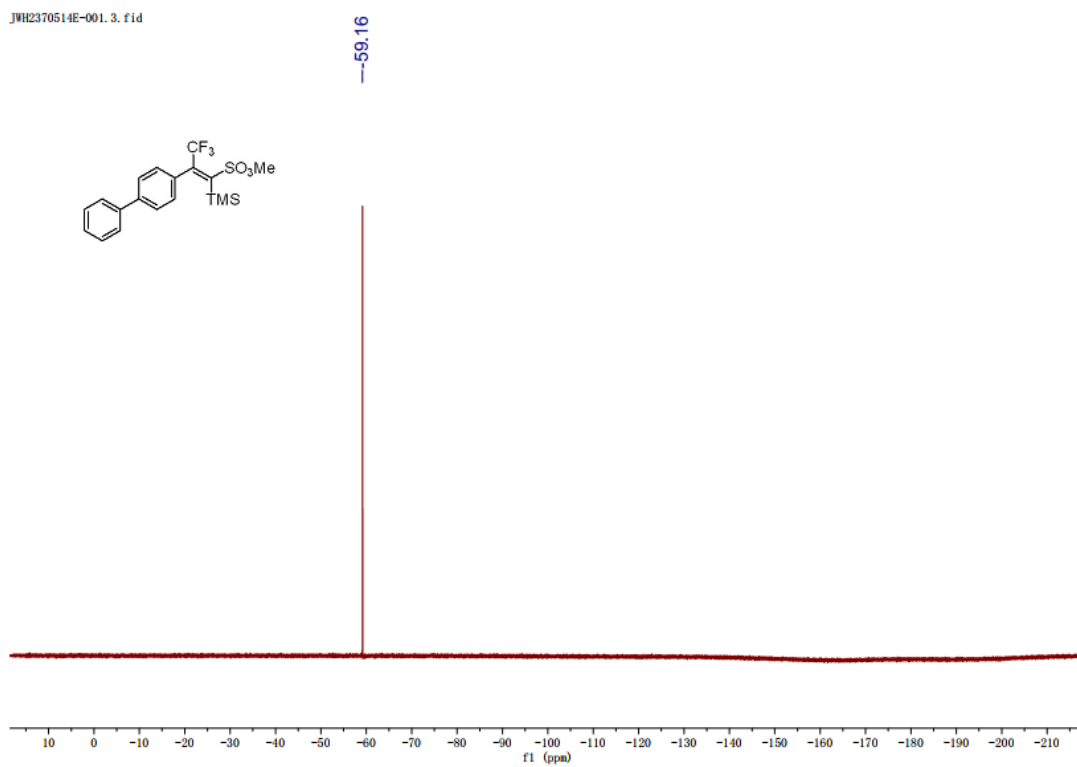

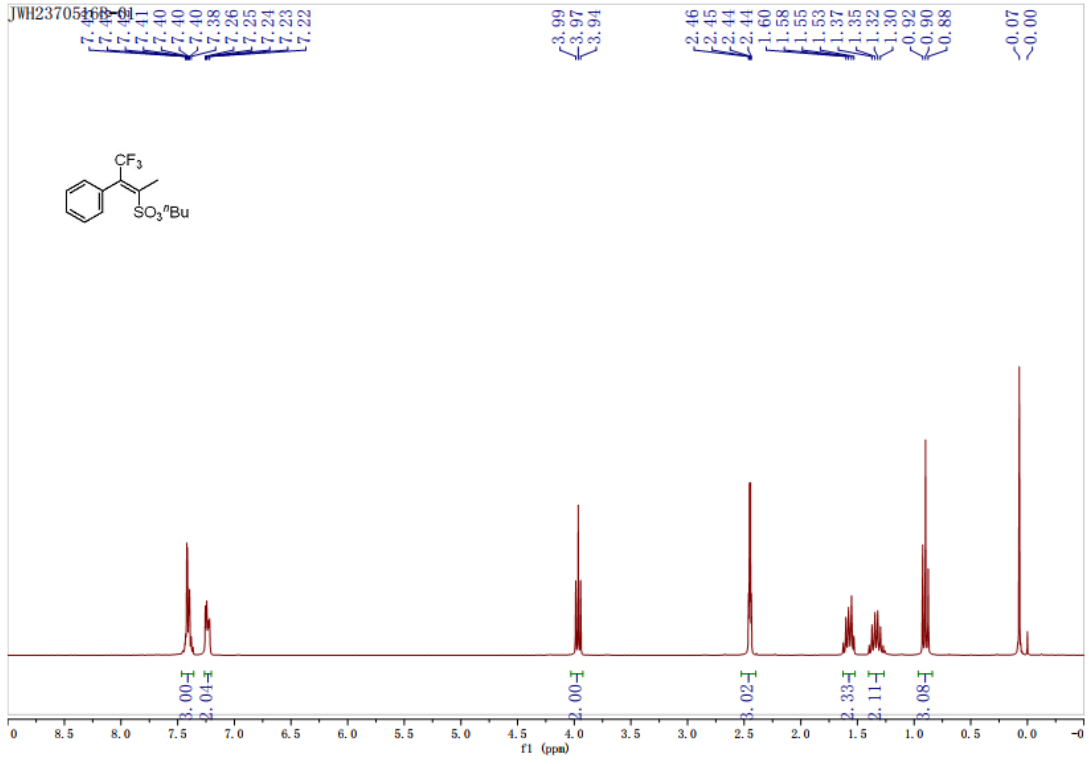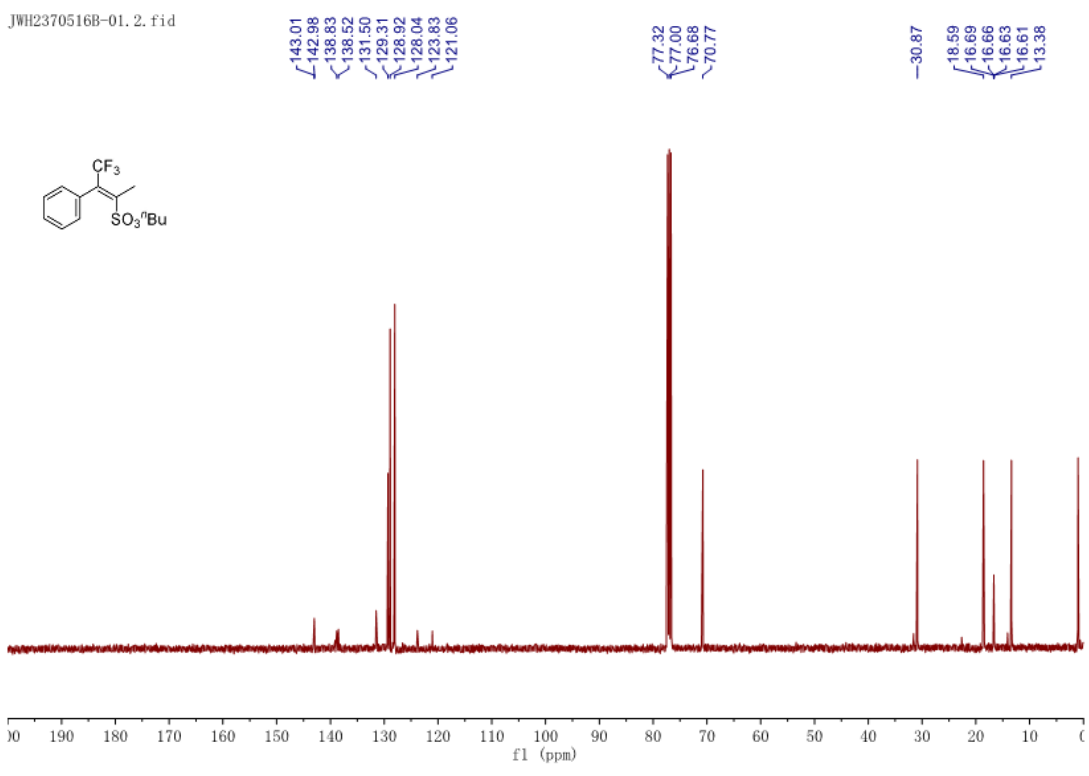

JWH2370516B-1

58.74  
58.75  
58.76  
58.77

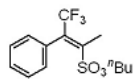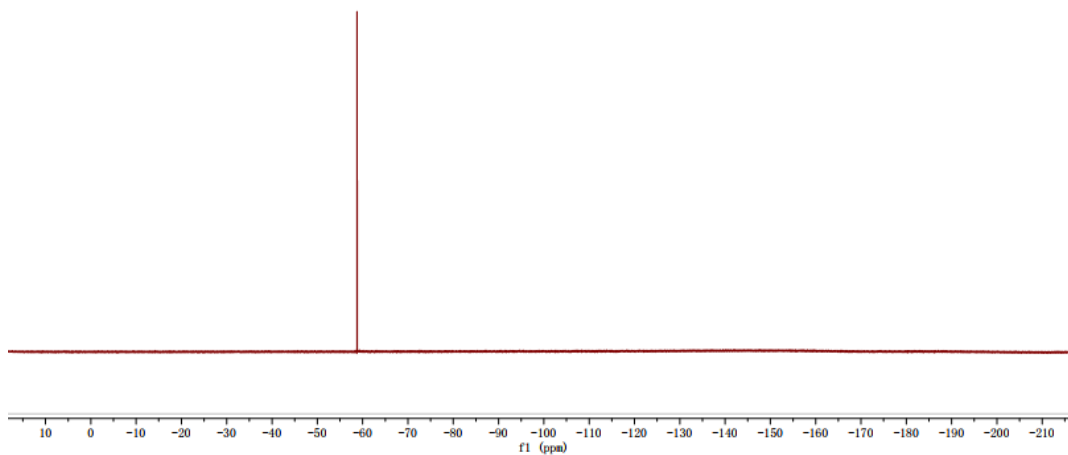

JWH2370521B-1, f1

7.448  
7.433  
7.43  
7.42  
7.41  
7.41  
7.40  
7.40  
7.39  
7.39  
7.38  
7.38  
7.38  
7.26  
7.25  
7.24  
7.22  
7.21

4.80  
4.78  
4.76  
4.74  
4.72

2.46  
2.45  
2.44

1.55  
1.32  
1.30

0.00

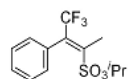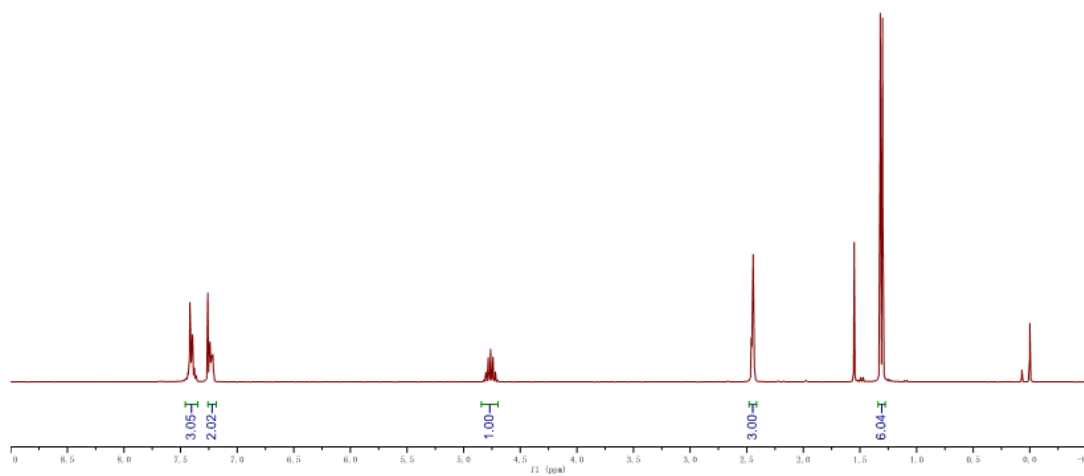

JH2370521D-1.2.fid

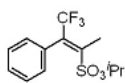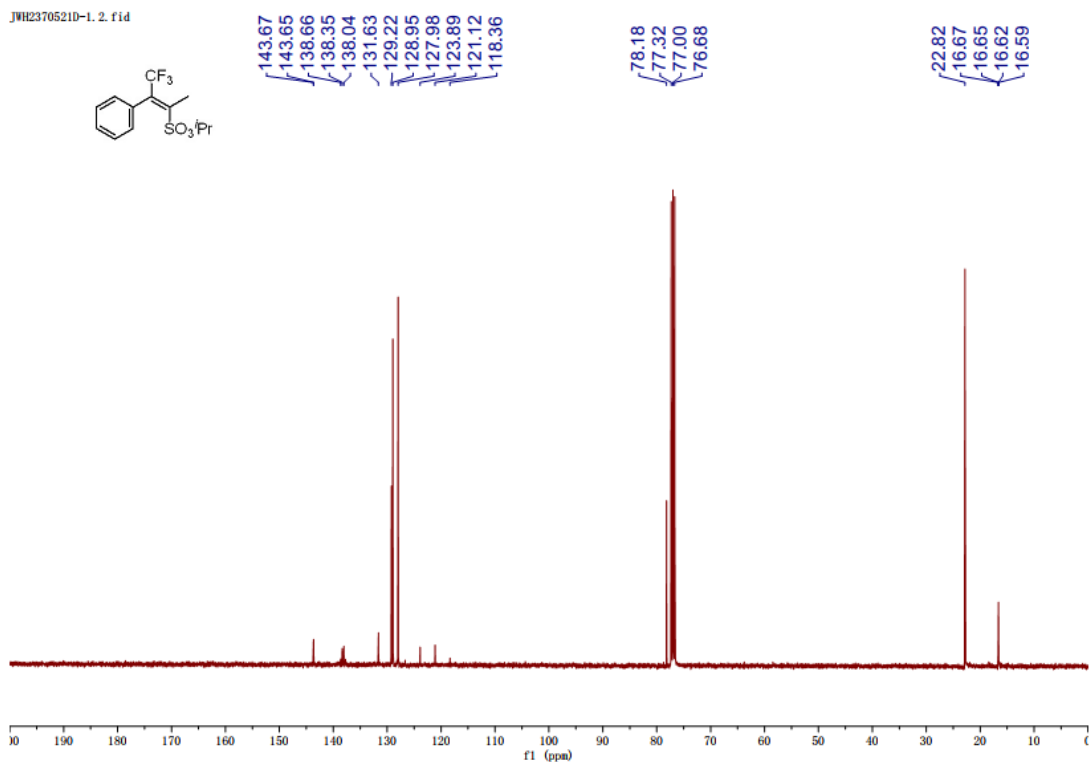

JH2370521D-1.3.fid

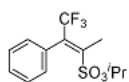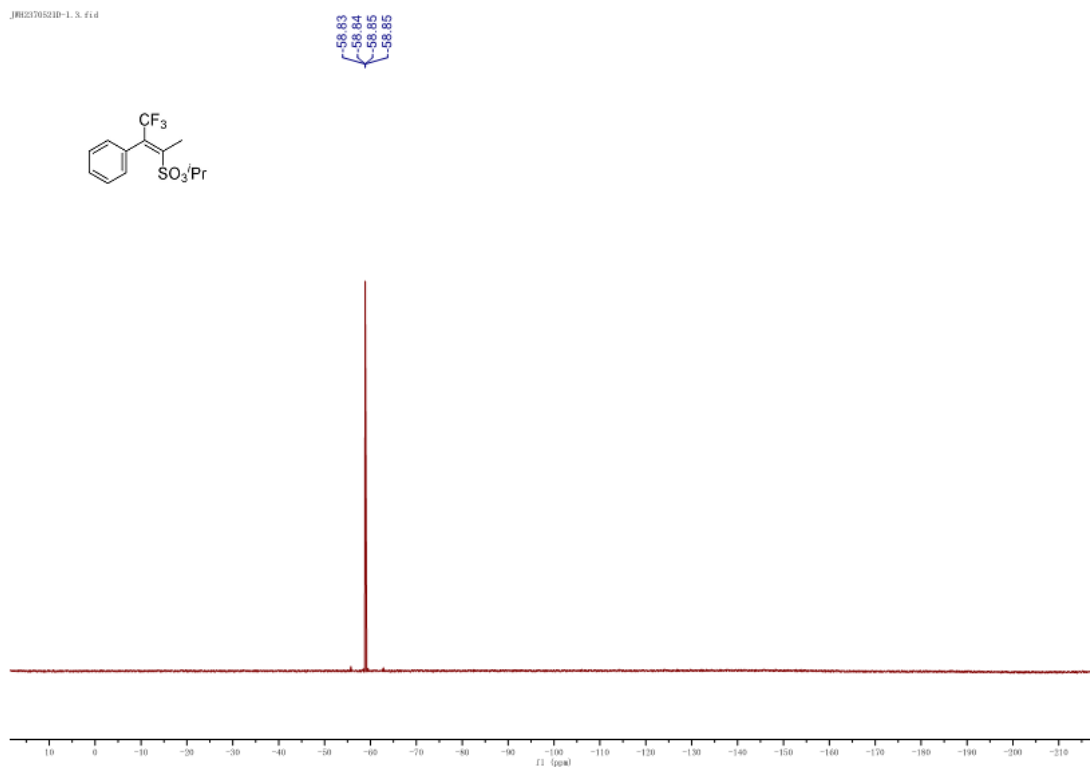

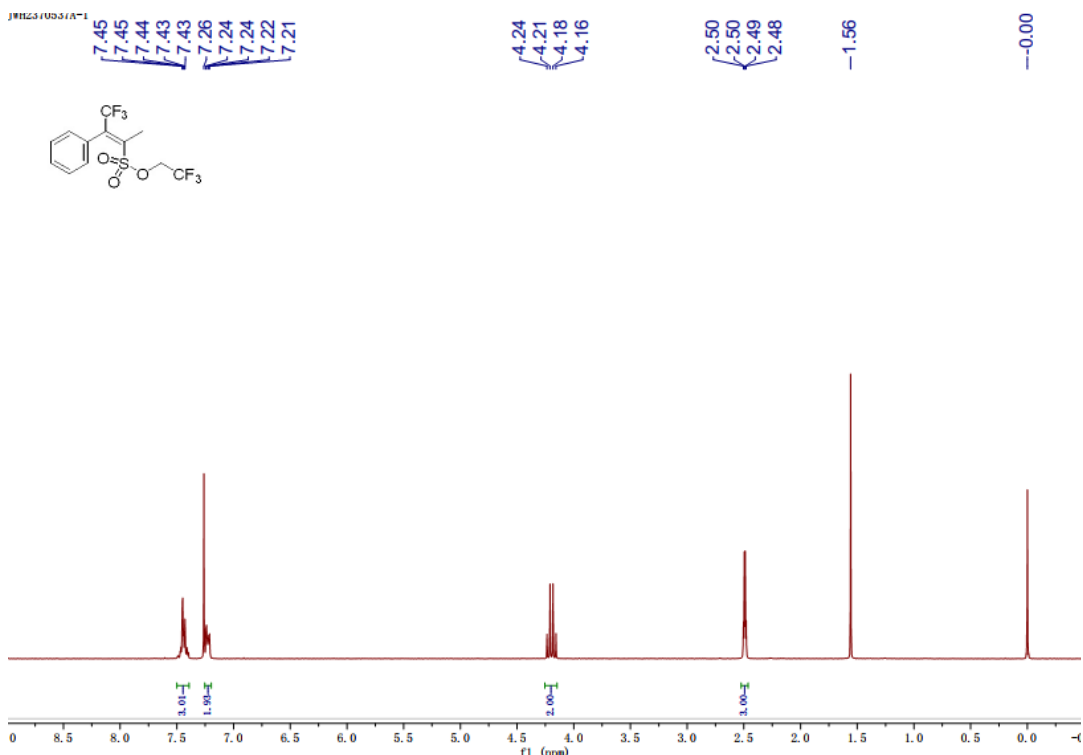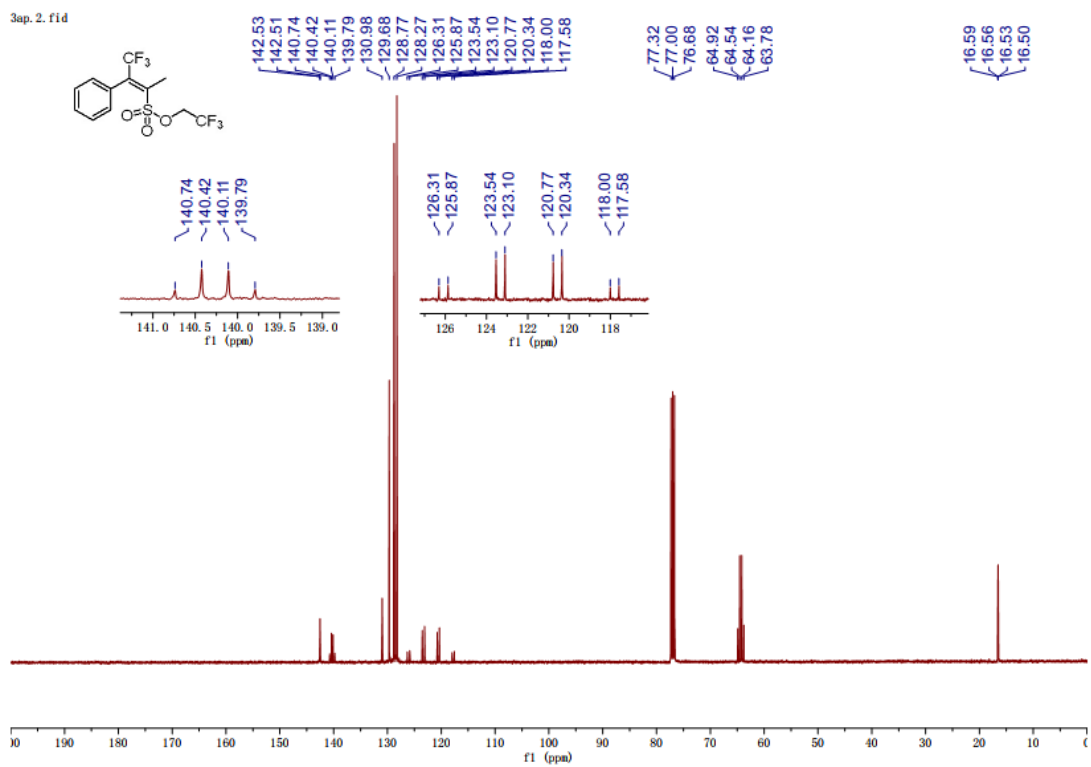



JWH2370537A-1

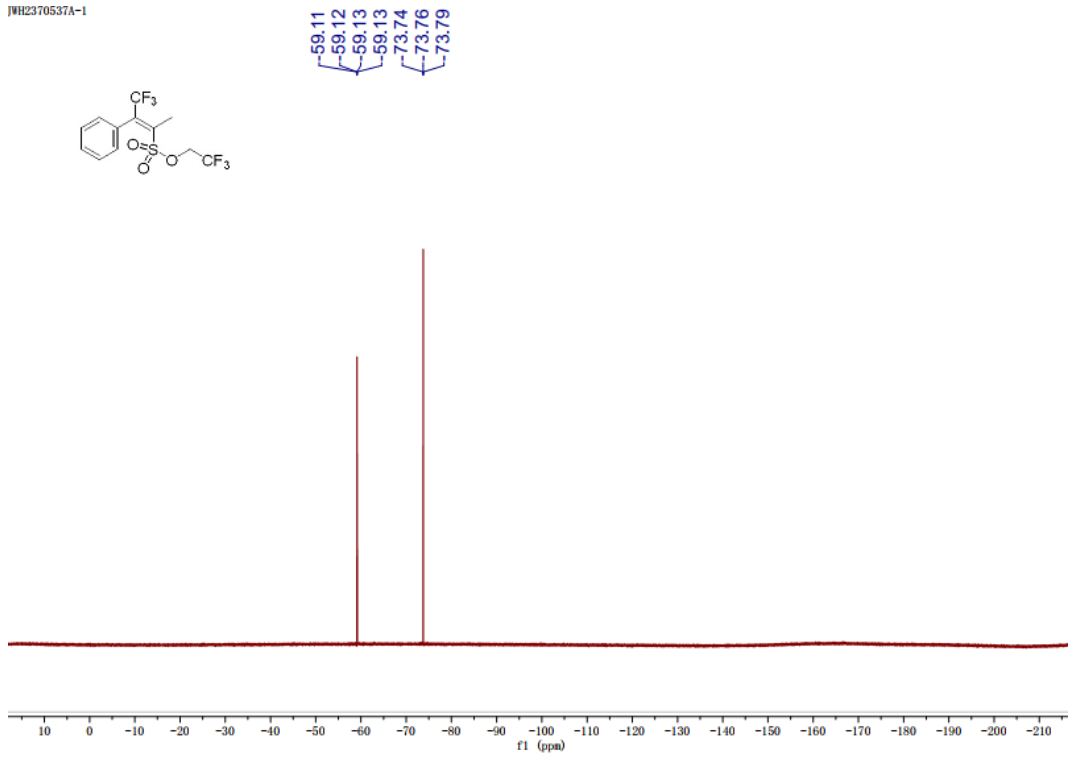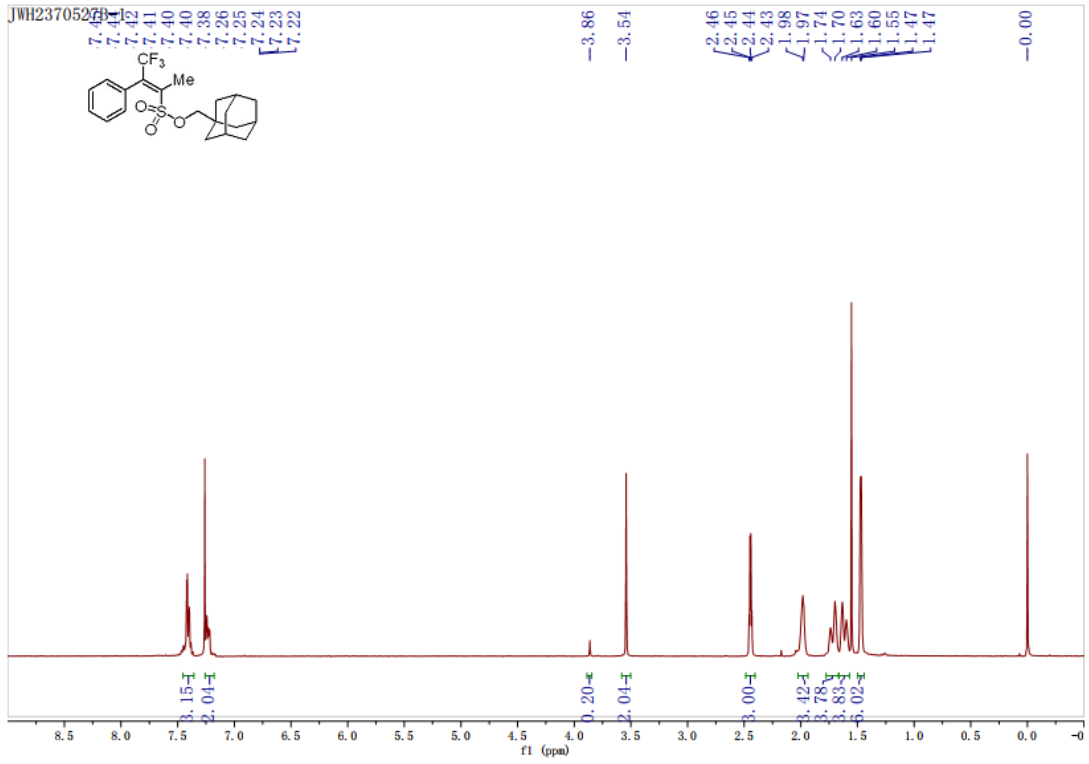

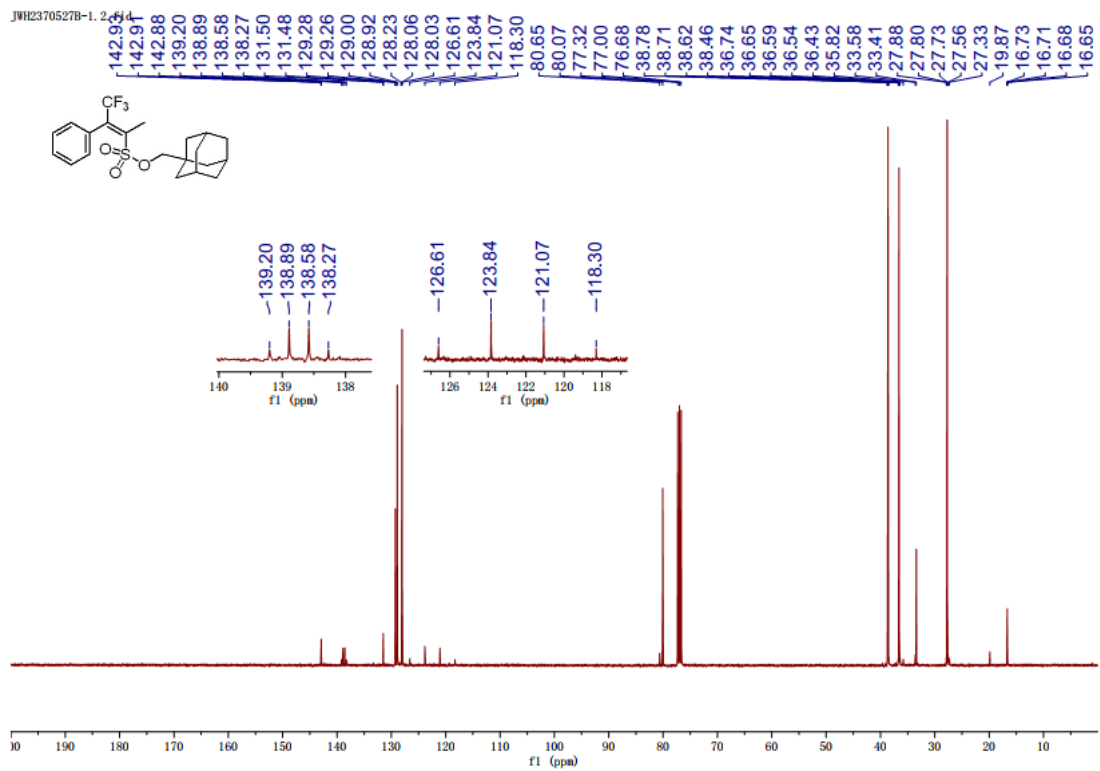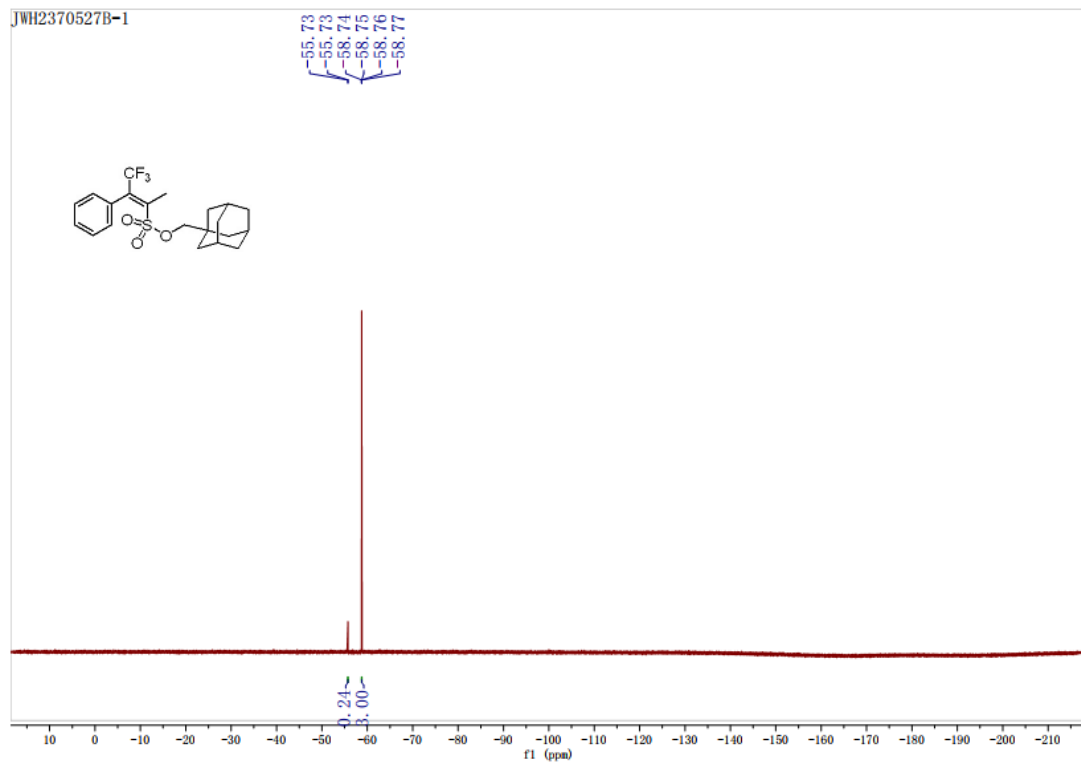

JWZ370507A001

7.54  
7.49  
7.44  
7.39  
7.34  
7.29  
7.24  
7.19  
7.14  
7.09  
7.04  
7.00

3.69

2.94  
2.91  
2.88  
2.85  
2.82  
2.79  
2.76  
2.73  
2.70  
2.67  
2.64  
2.61  
2.58  
2.55  
2.52  
2.49  
2.46  
2.43  
2.40  
2.37  
2.34  
2.31  
2.28  
2.25  
2.22  
2.19  
2.16  
2.13  
2.10  
2.07  
2.04  
2.01  
1.98  
1.95  
1.92  
1.89  
1.86  
1.83  
1.80  
1.77  
1.74  
1.71  
1.68  
1.65  
1.62  
1.59  
1.56  
1.53  
1.50  
1.47  
1.44  
1.41  
1.38  
1.35  
1.32  
1.29  
1.26  
1.23  
1.20  
1.17  
1.14  
1.11  
1.08  
1.05  
1.02  
0.99  
0.96  
0.93  
0.90  
0.87  
0.84  
0.81  
0.78  
0.75  
0.72  
0.69  
0.66  
0.63  
0.60  
0.57  
0.54  
0.51  
0.48  
0.45  
0.42  
0.39  
0.36  
0.33  
0.30  
0.27  
0.24  
0.21  
0.18  
0.15  
0.12  
0.09  
0.06  
0.03  
0.00

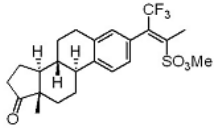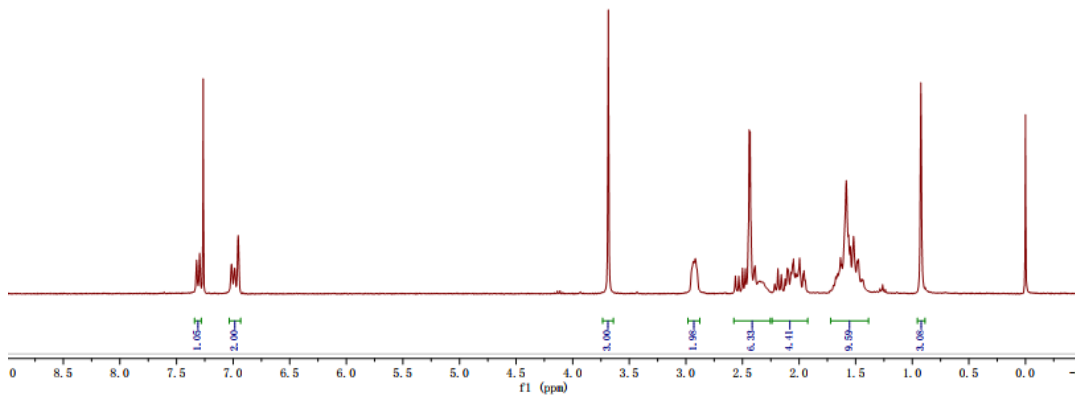

wh2370507a-10.fid

220.63

141.86  
141.08  
139.54  
139.30  
136.29  
129.29  
128.67  
126.05  
125.70  
124.92  
123.48  
121.27  
119.05

77.26  
77.00  
76.75  
56.07  
50.48  
47.87  
44.35  
44.19  
44.19  
37.73  
35.76  
31.49  
29.08  
26.28  
25.39  
21.51  
16.70  
16.68  
16.65  
16.63  
13.80

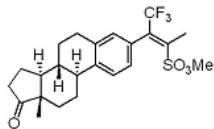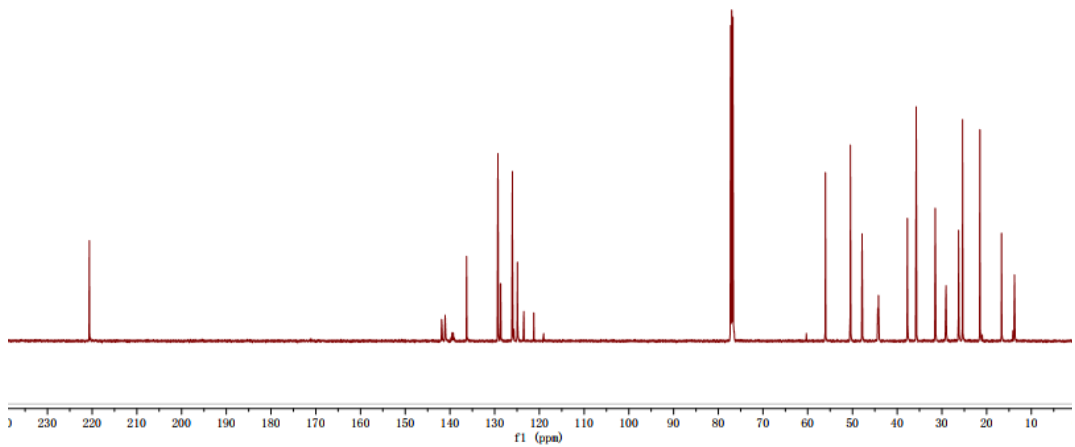

JWH2370507A001

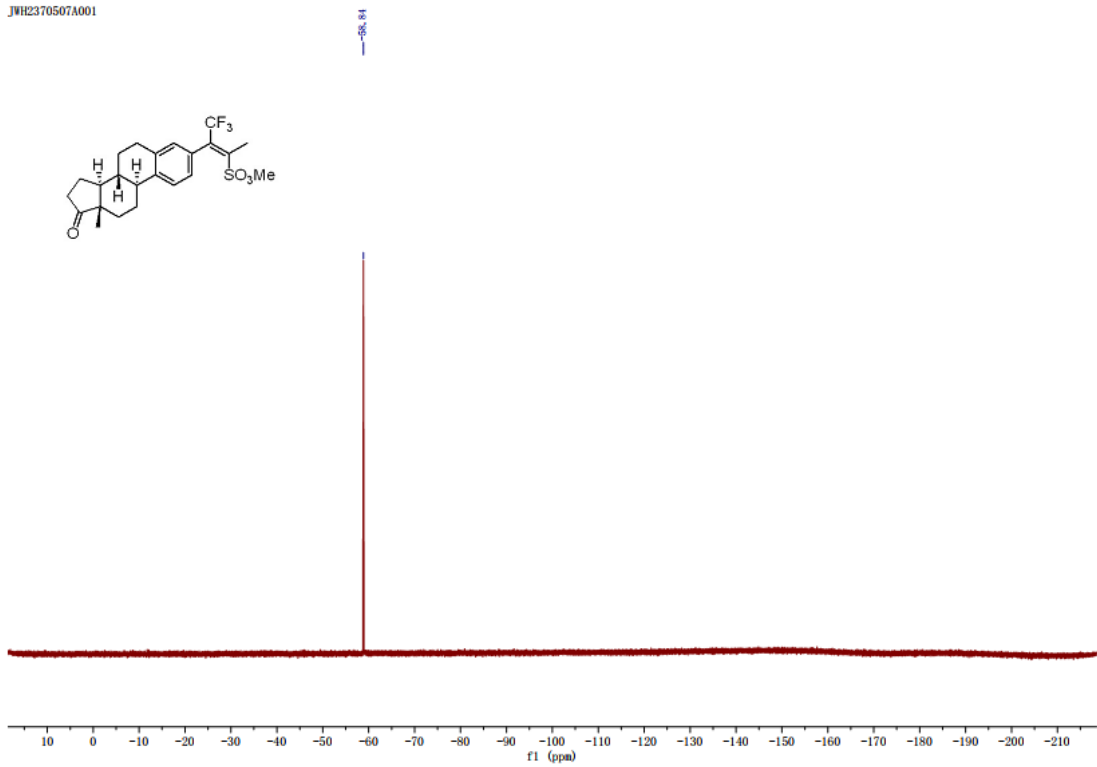

JWH2370546B-2

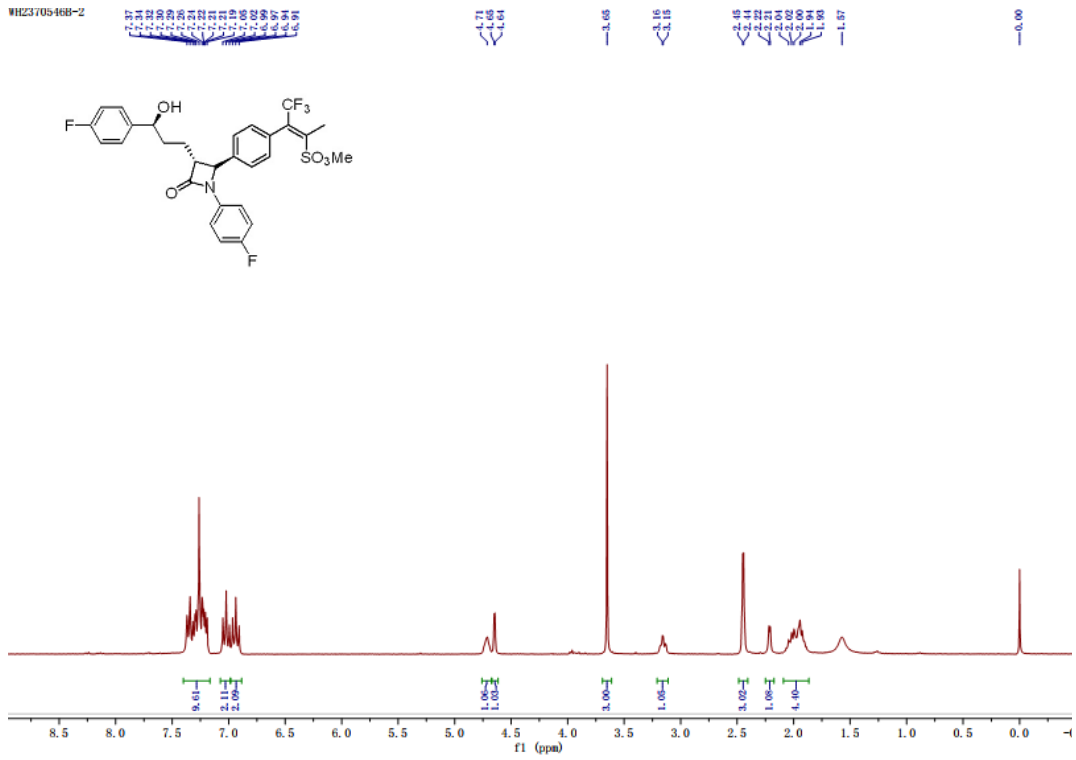

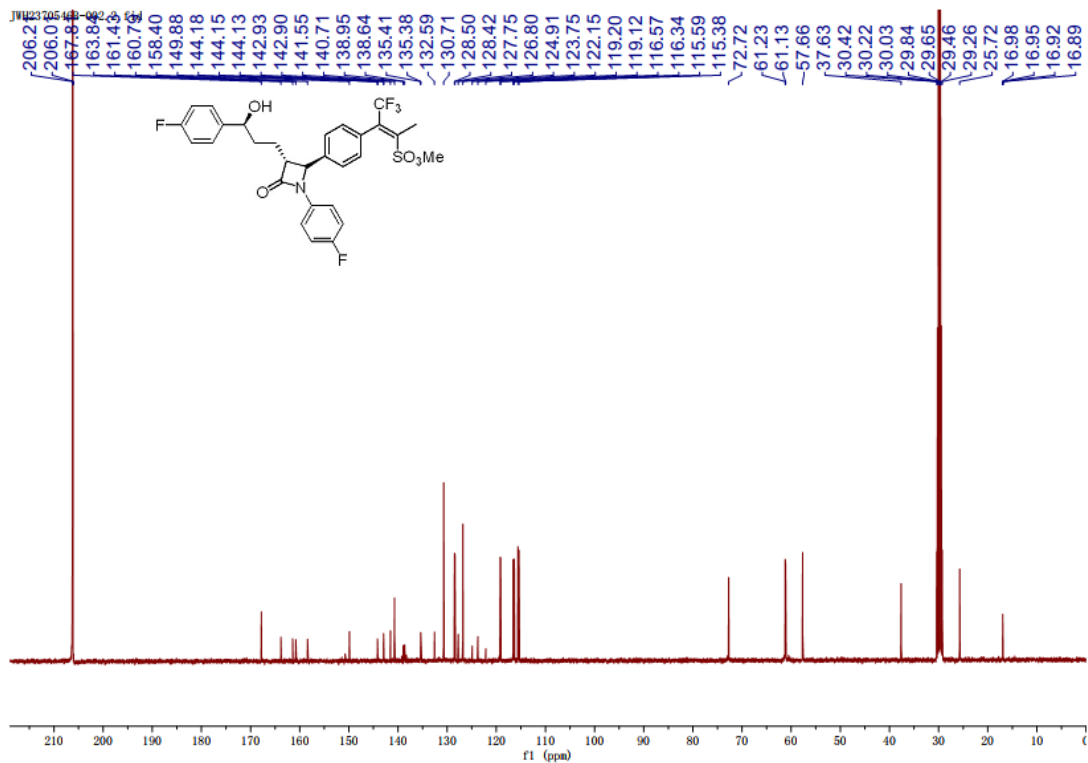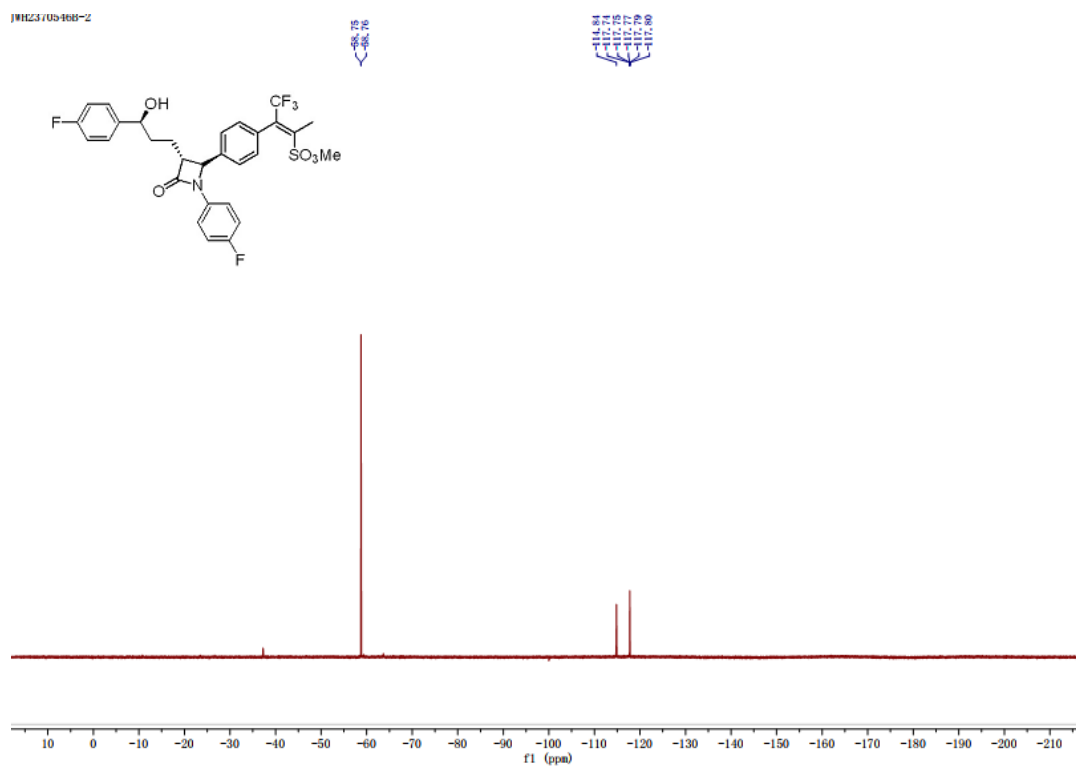

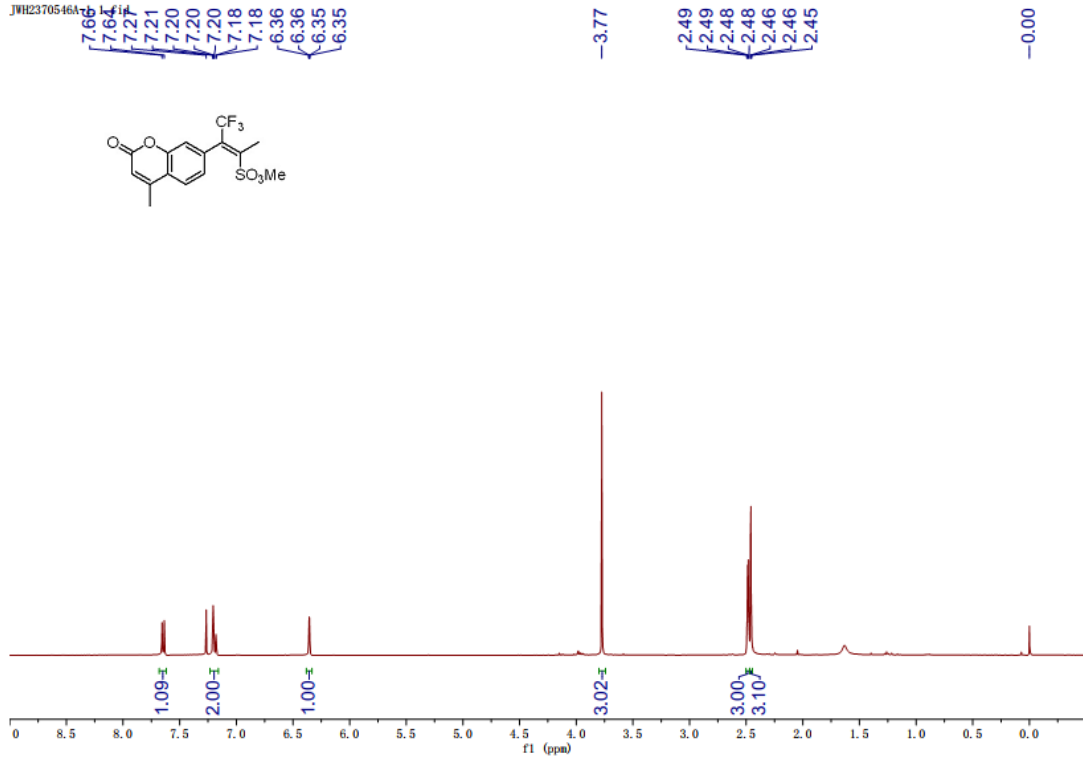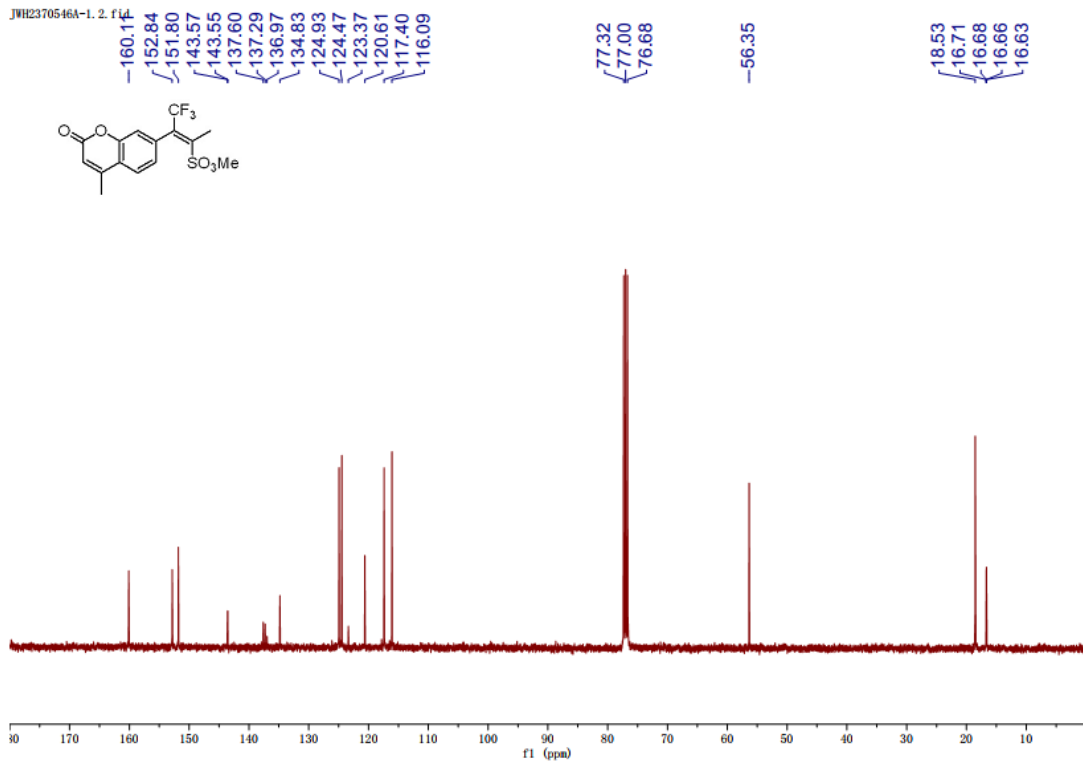

JWH2370546A-1.3.fid

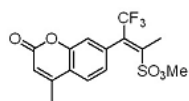

58.55  
58.55  
58.56  
58.57

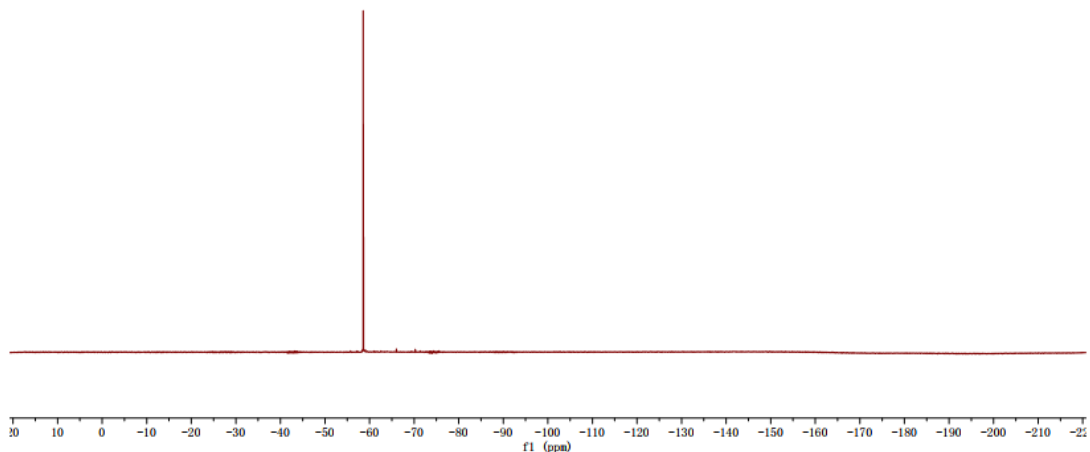

JWH2370546C-1.1.fid

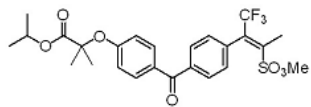

7.80  
7.78  
7.78  
7.77  
7.76  
7.35  
7.34  
7.34  
7.27  
6.88  
6.87  
6.86  
5.11  
5.09  
5.07  
-3.72  
2.49  
2.49  
2.48  
2.47  
1.67  
1.61  
1.21  
1.20  
-0.00

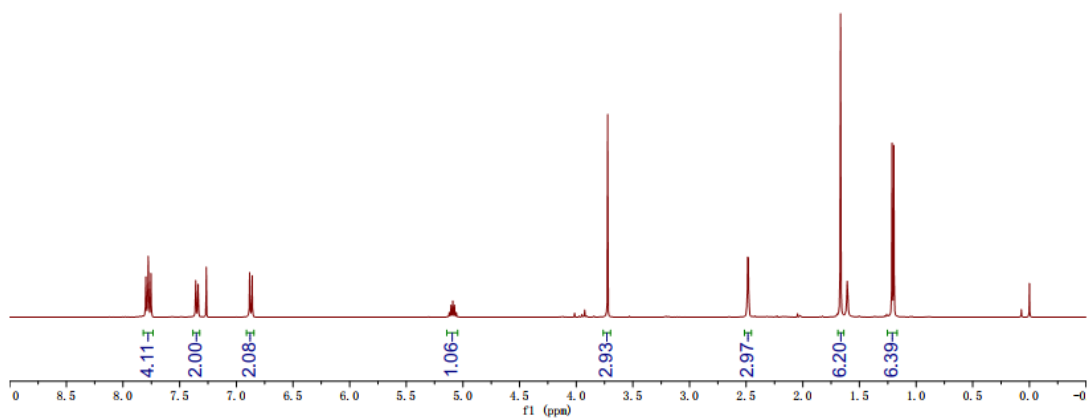

JWH2370546C-2.fid

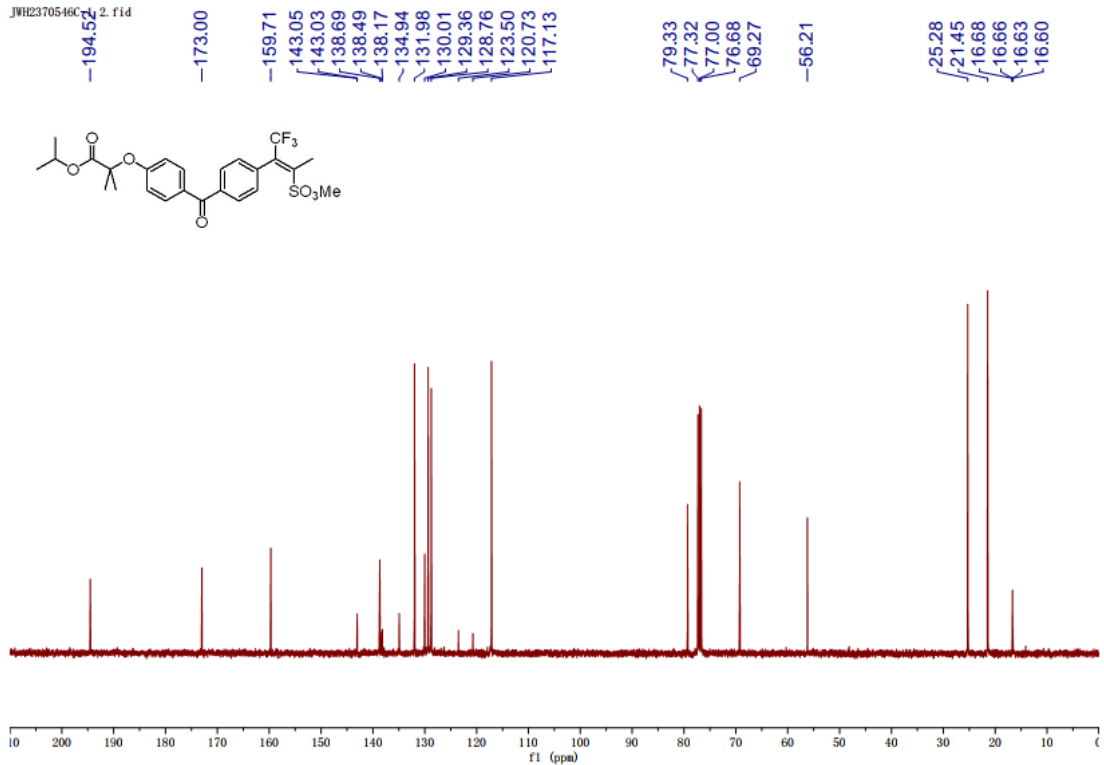

JWH2370546C-1.3.fid

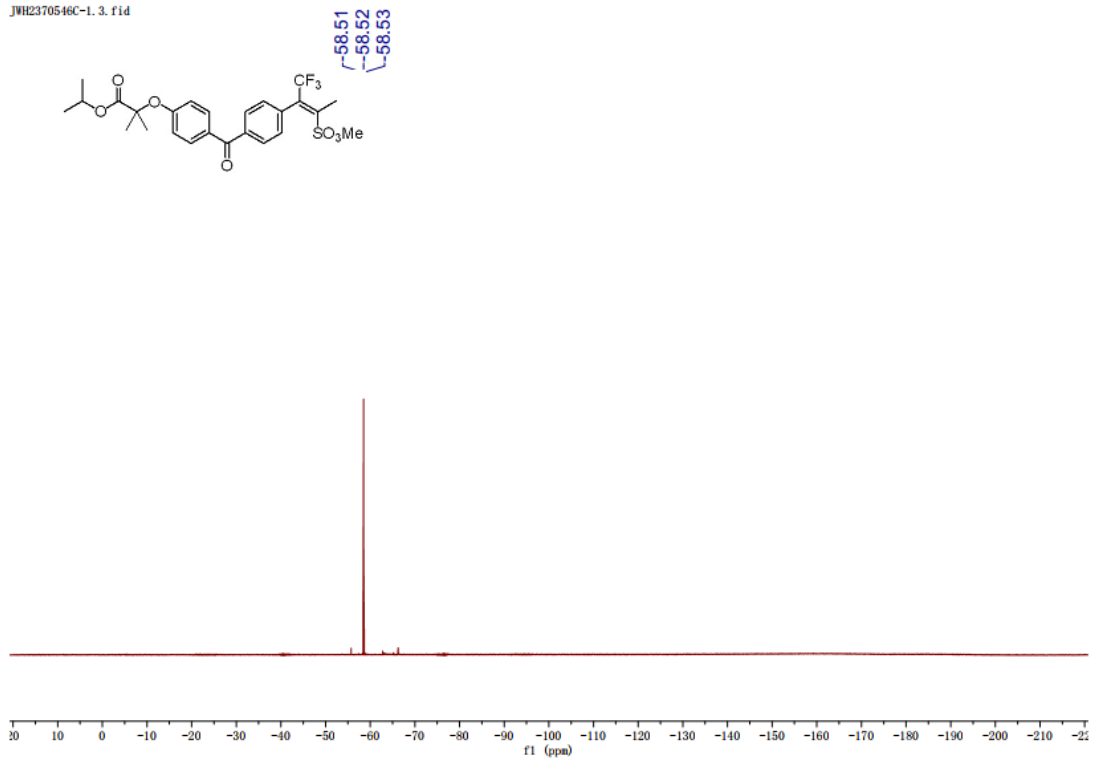



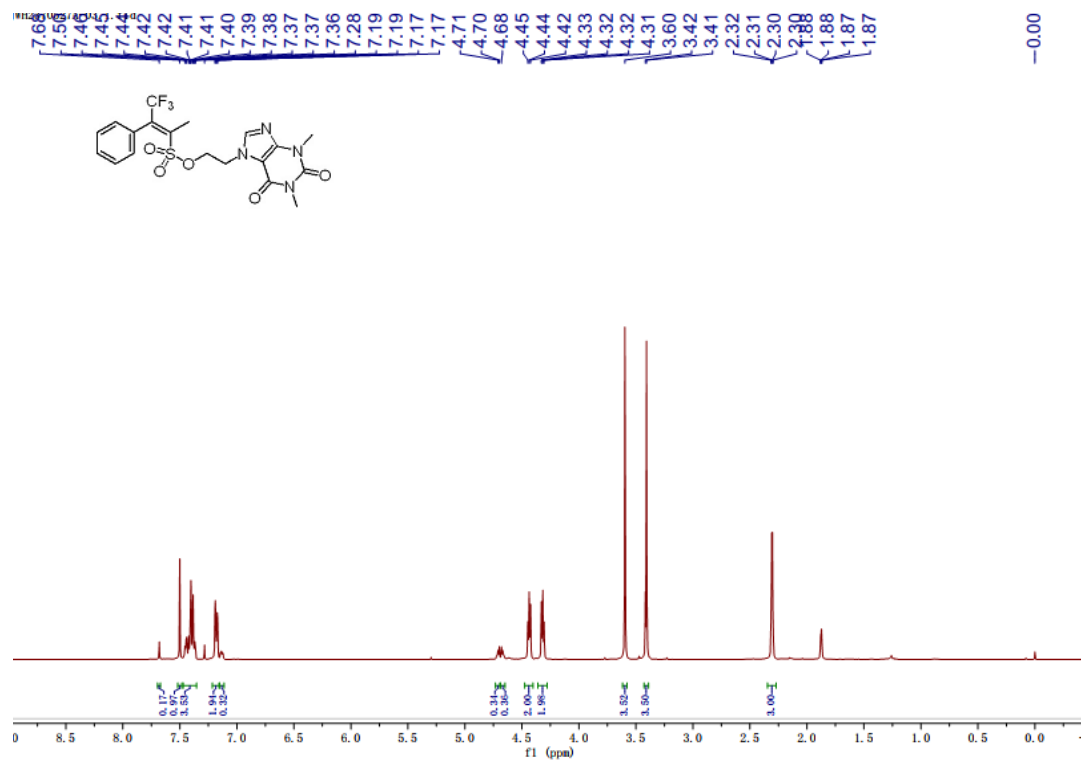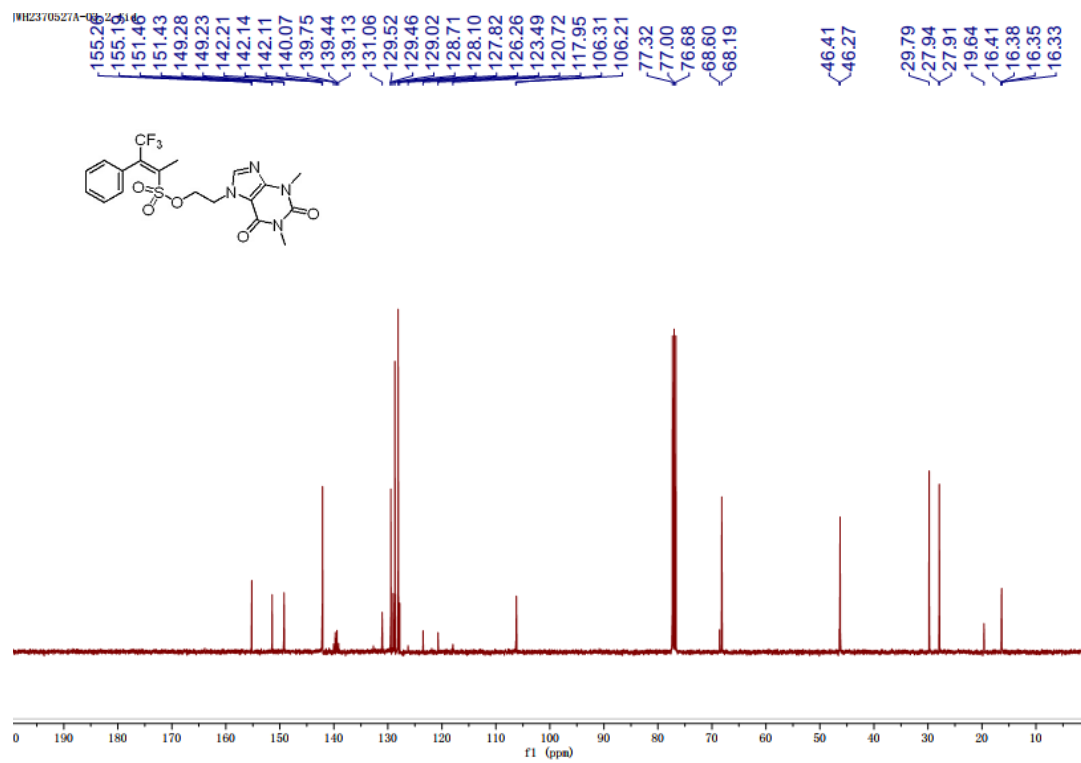

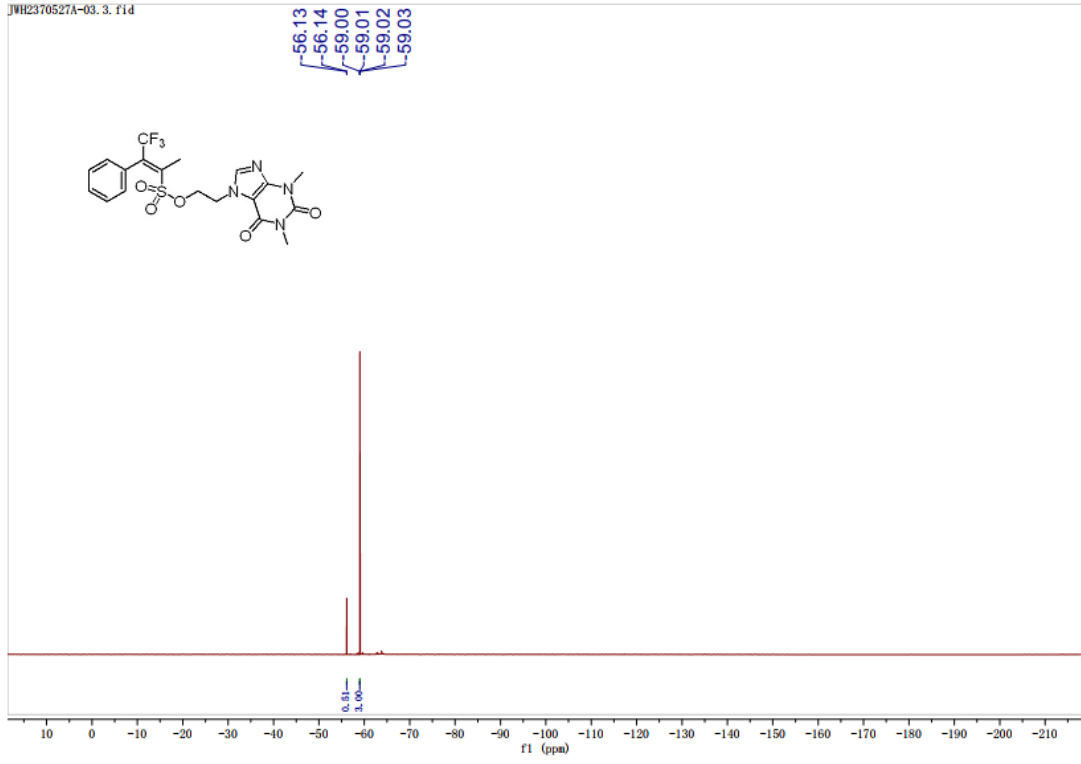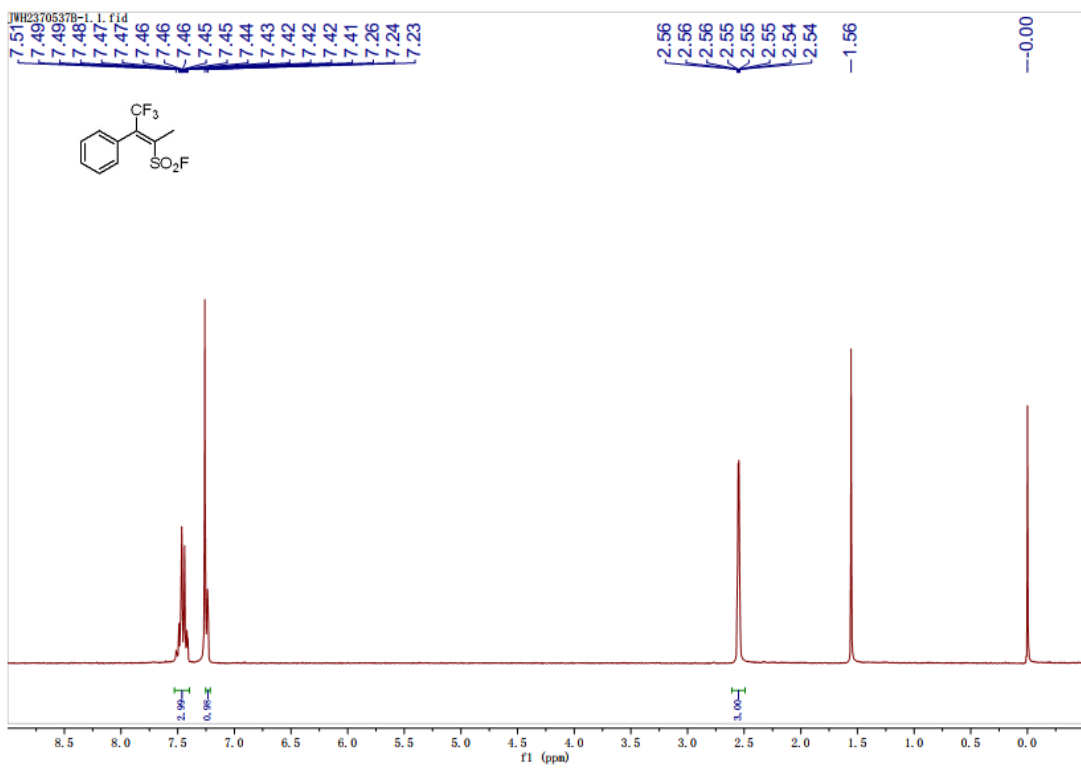

DXR2370986C.2.fid

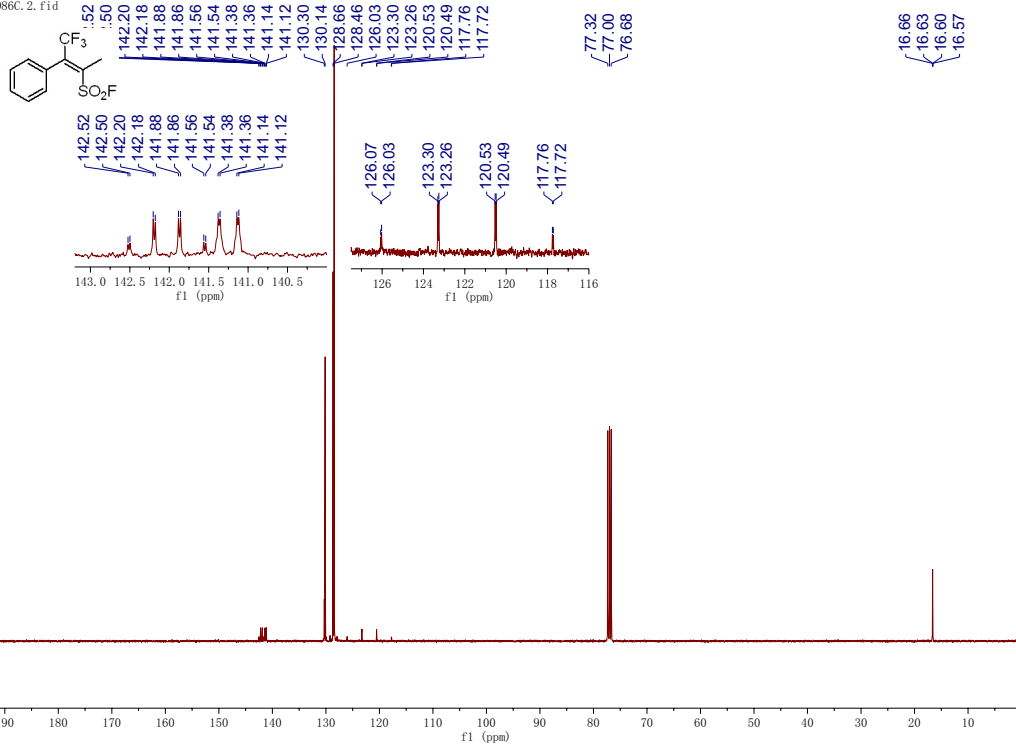

JWH2370537B-1.3.fid

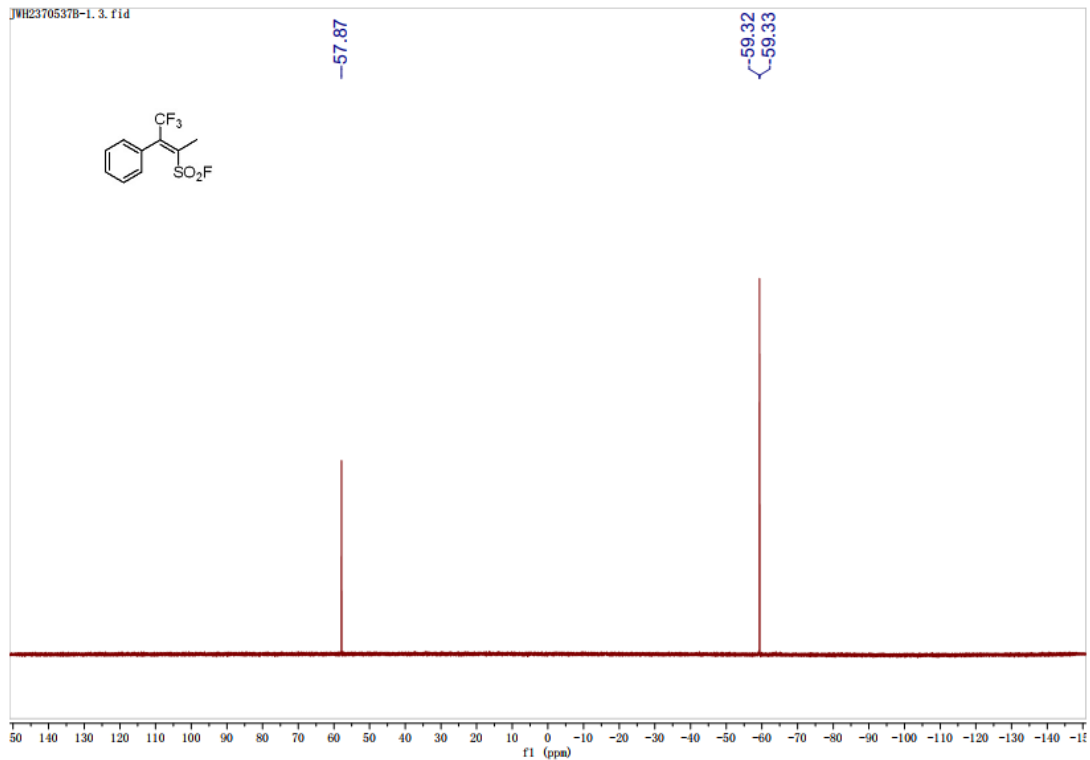

DIR2370984D-2.1.fid

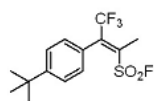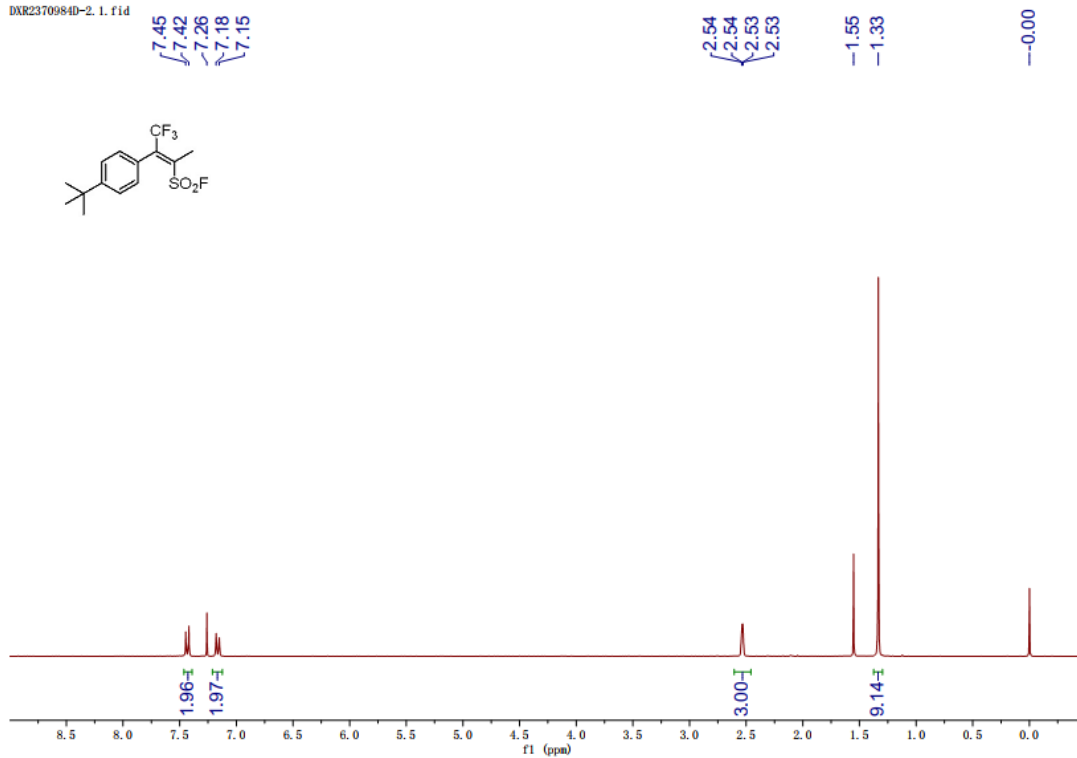

DIR2370984D-16.2.fid

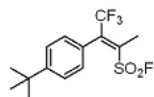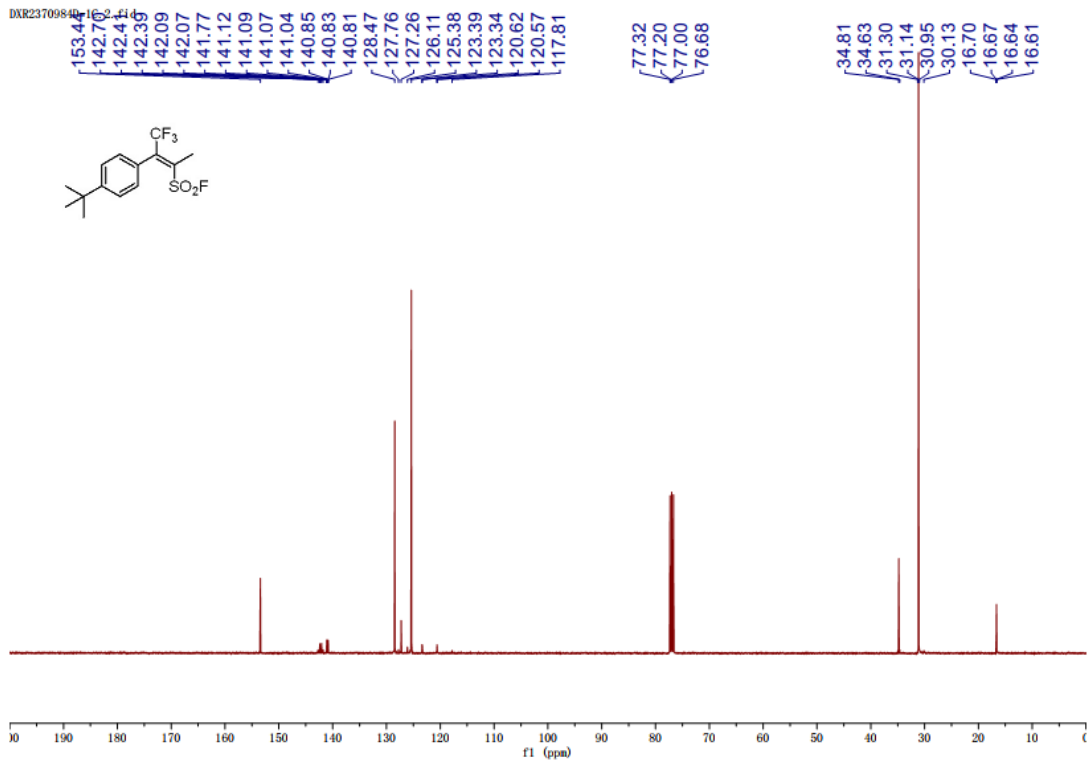

DIR2370987B-1.3.fid

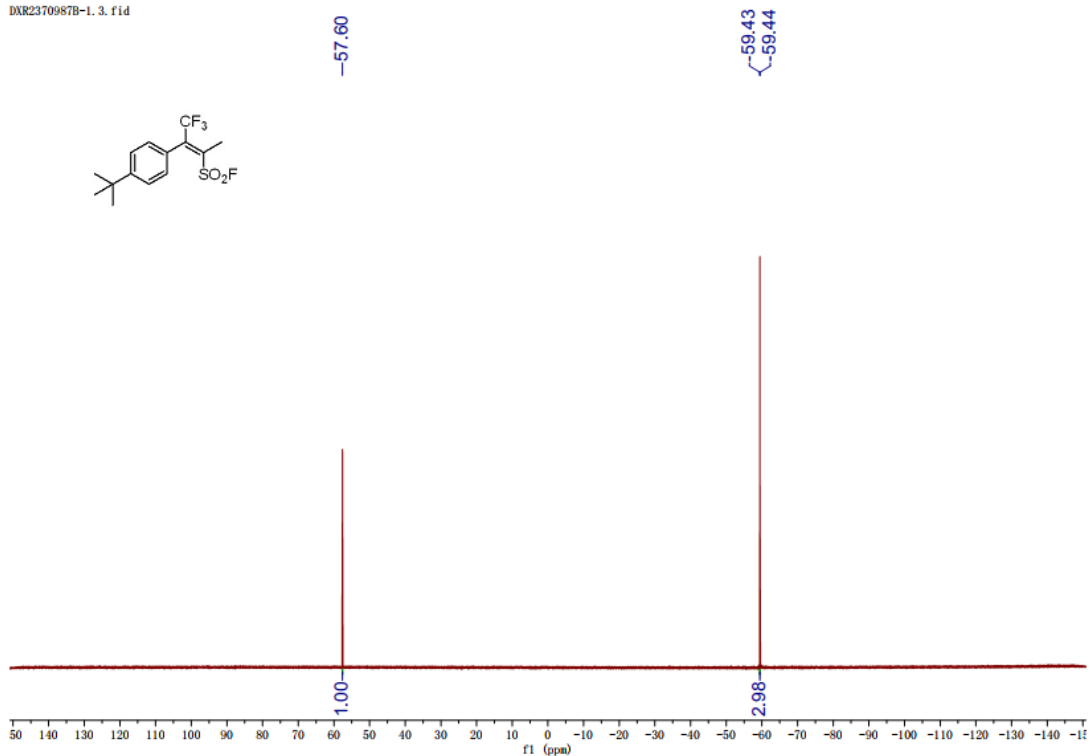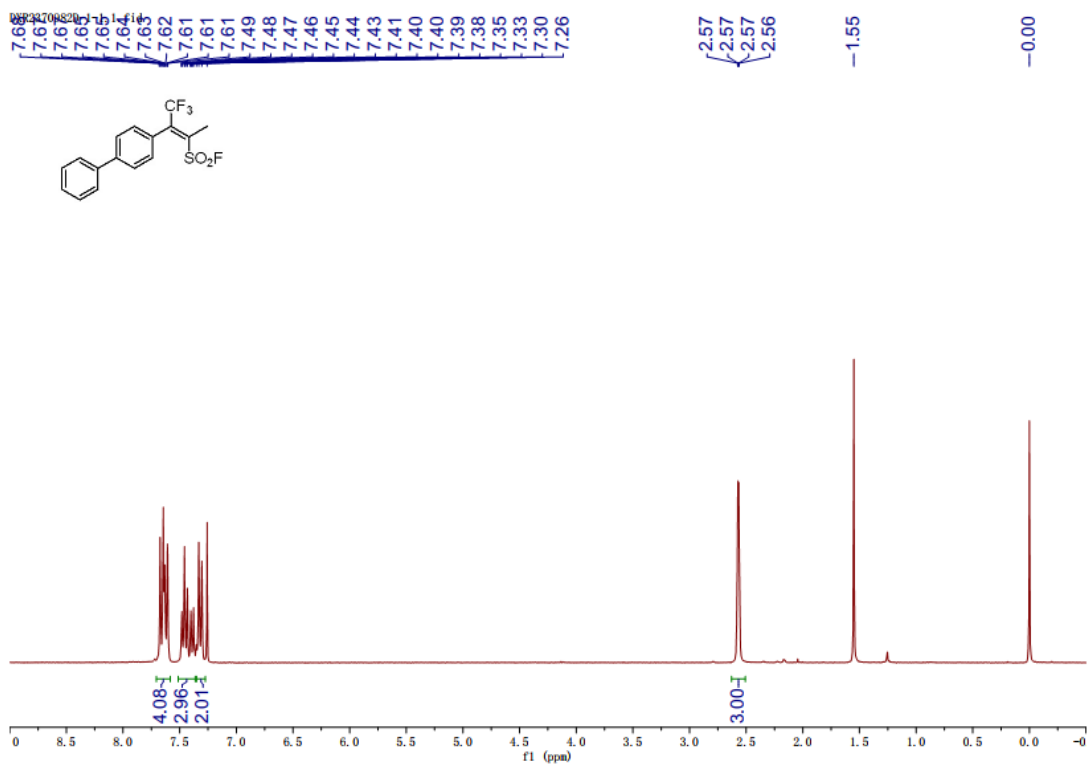

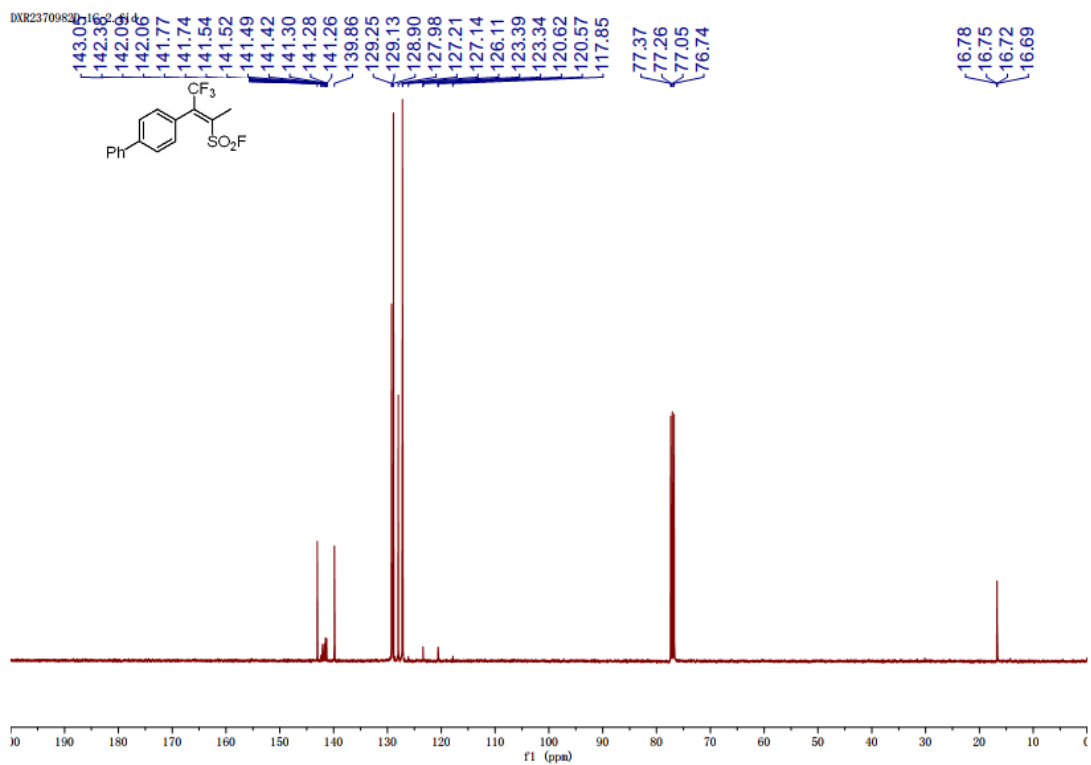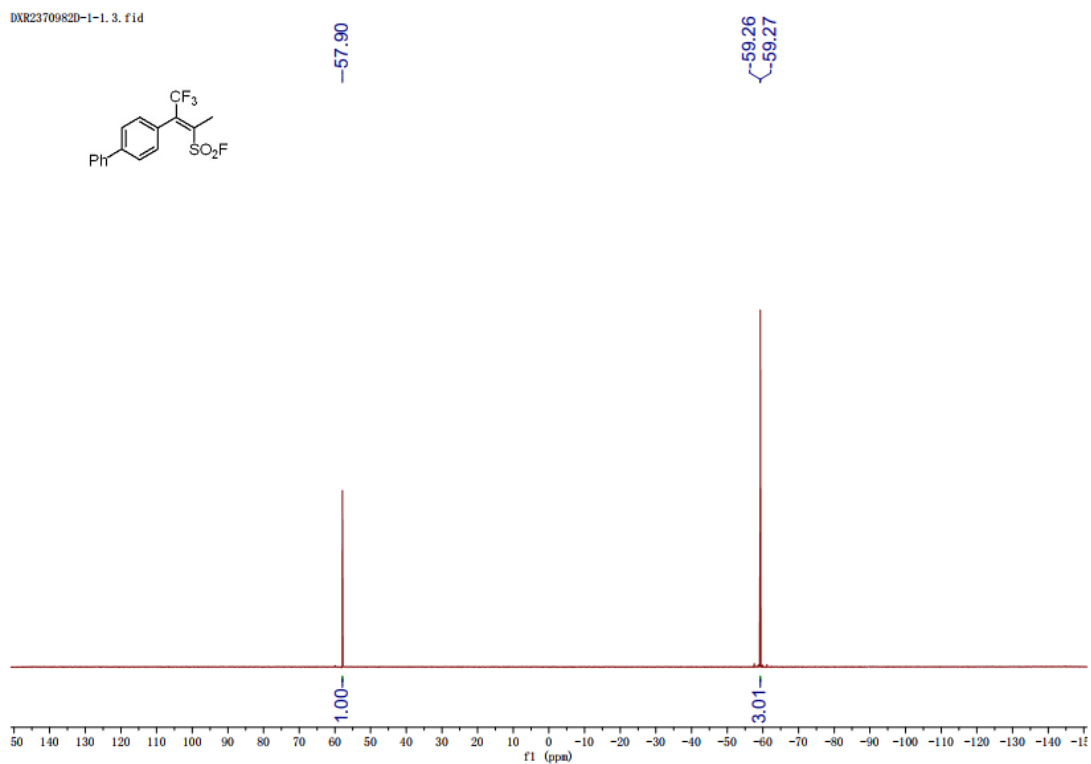

DIR2370981A\_4.fid

7.28  
7.26  
7.25  
7.22  
7.21  
7.20  
7.18

2.56  
2.55  
2.55  
2.54  
2.54  
2.53  
2.31  
-1.57

--0.00

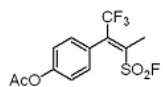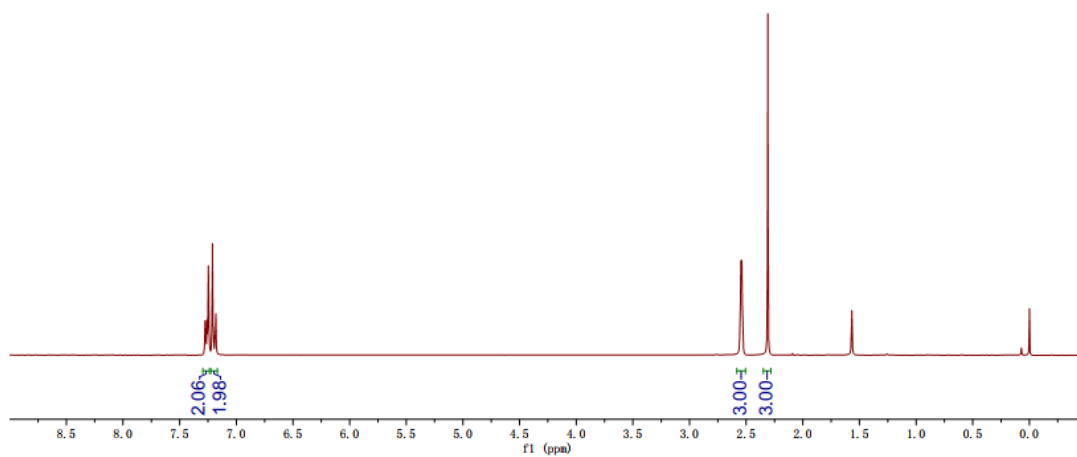

DIR2370981A-1-1.2.fid

152.08  
141.92  
141.90  
141.68  
141.37  
141.35  
141.05  
130.05  
127.49  
123.17  
123.13  
121.74  
120.40  
120.36

21.14  
16.70  
16.67

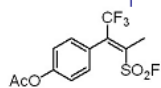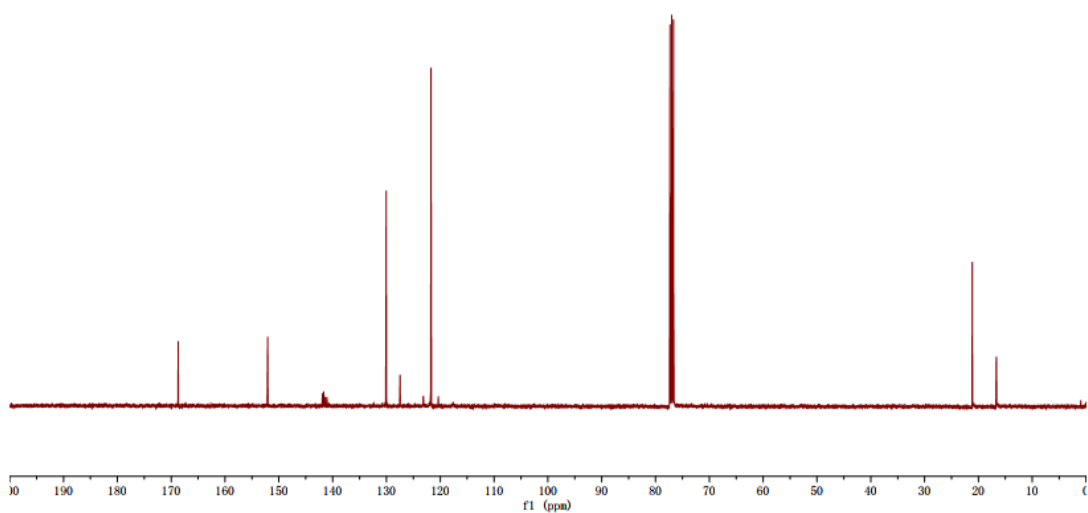

DIR2370981A-1-1.3.fid

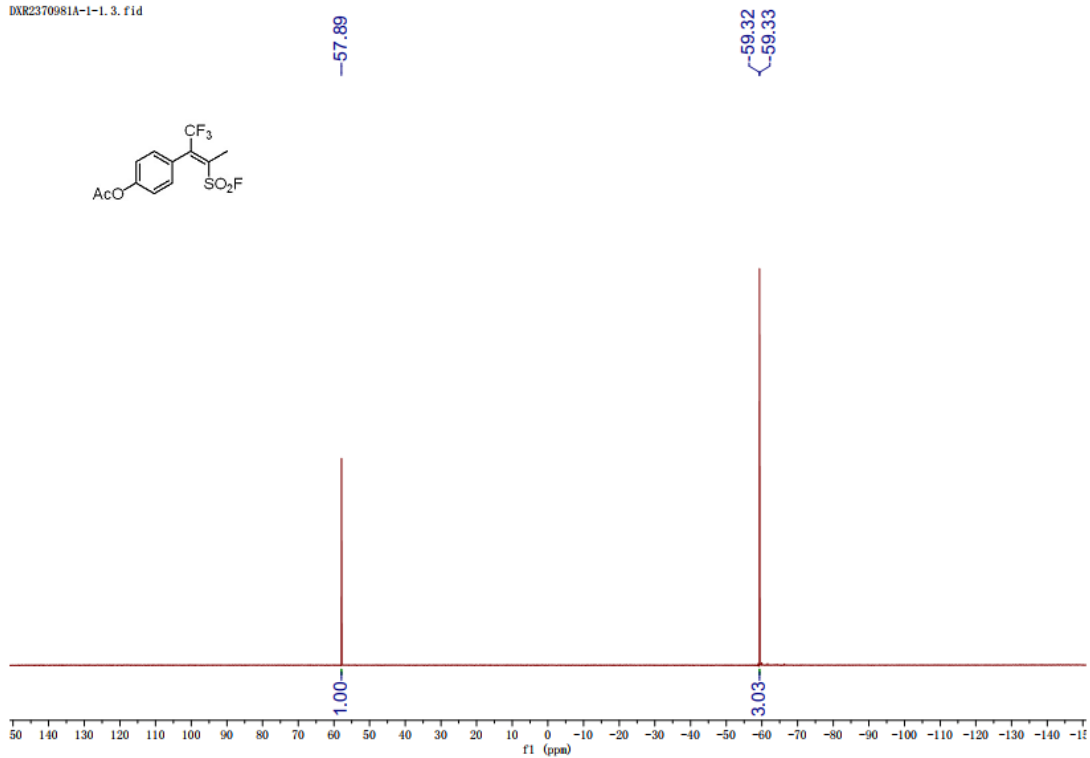

DIR2370975-1-1.1.fid

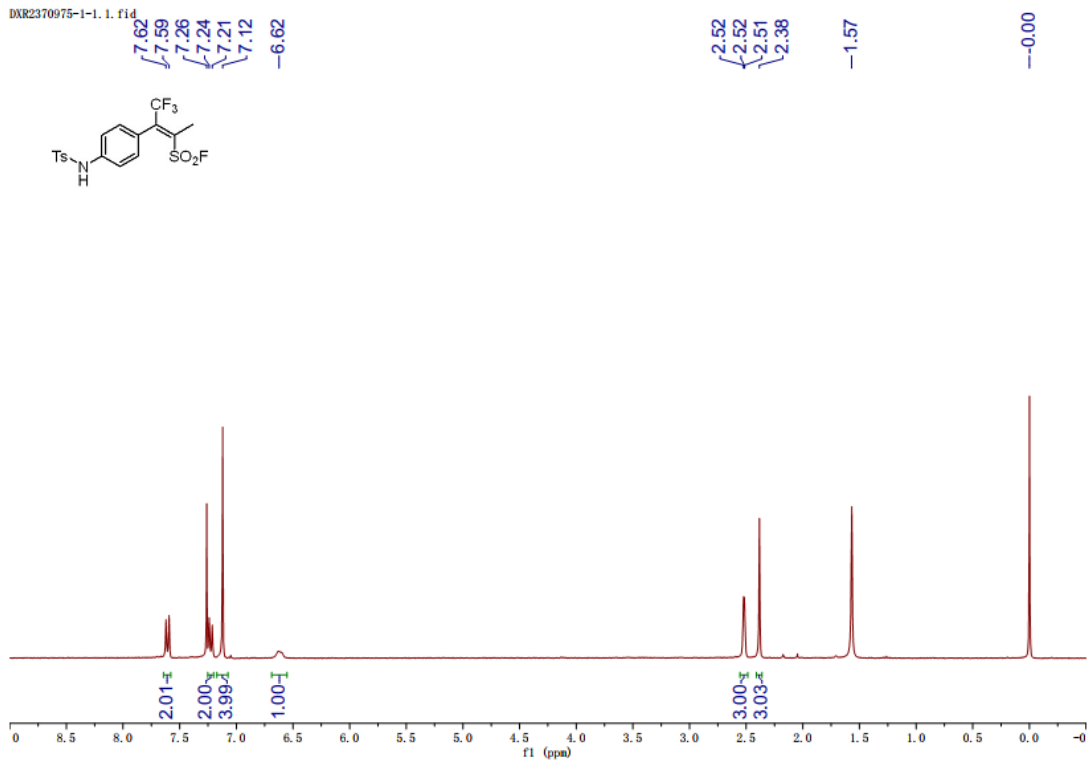



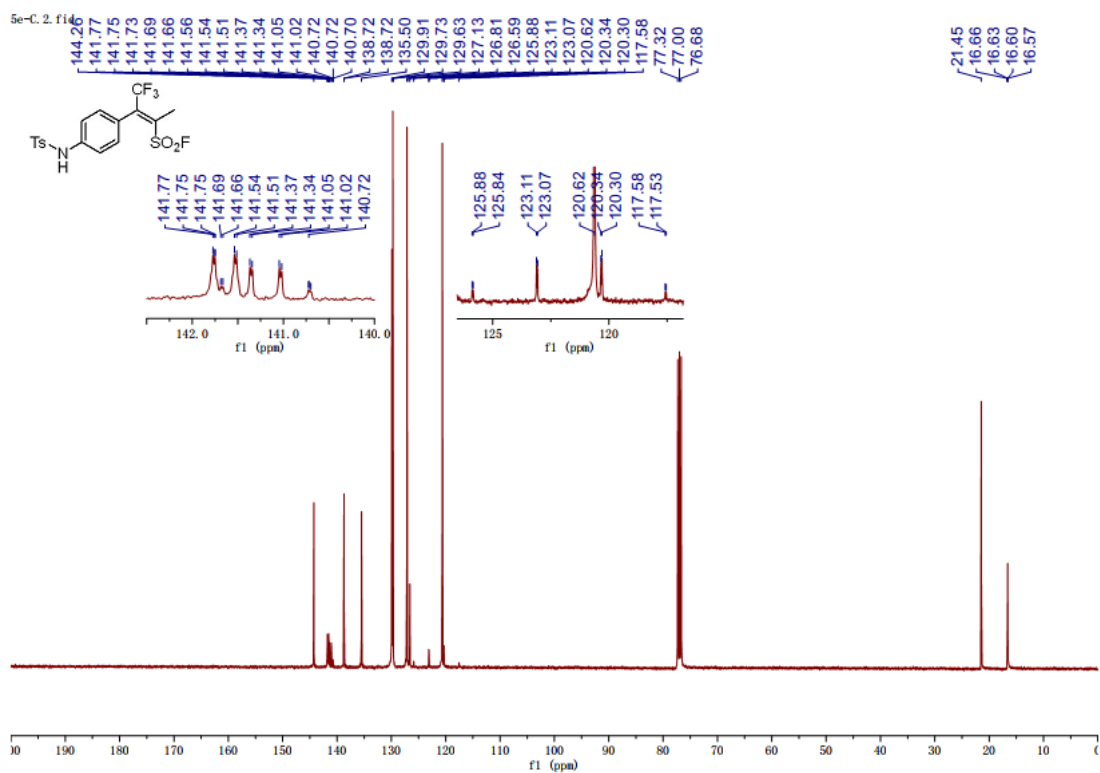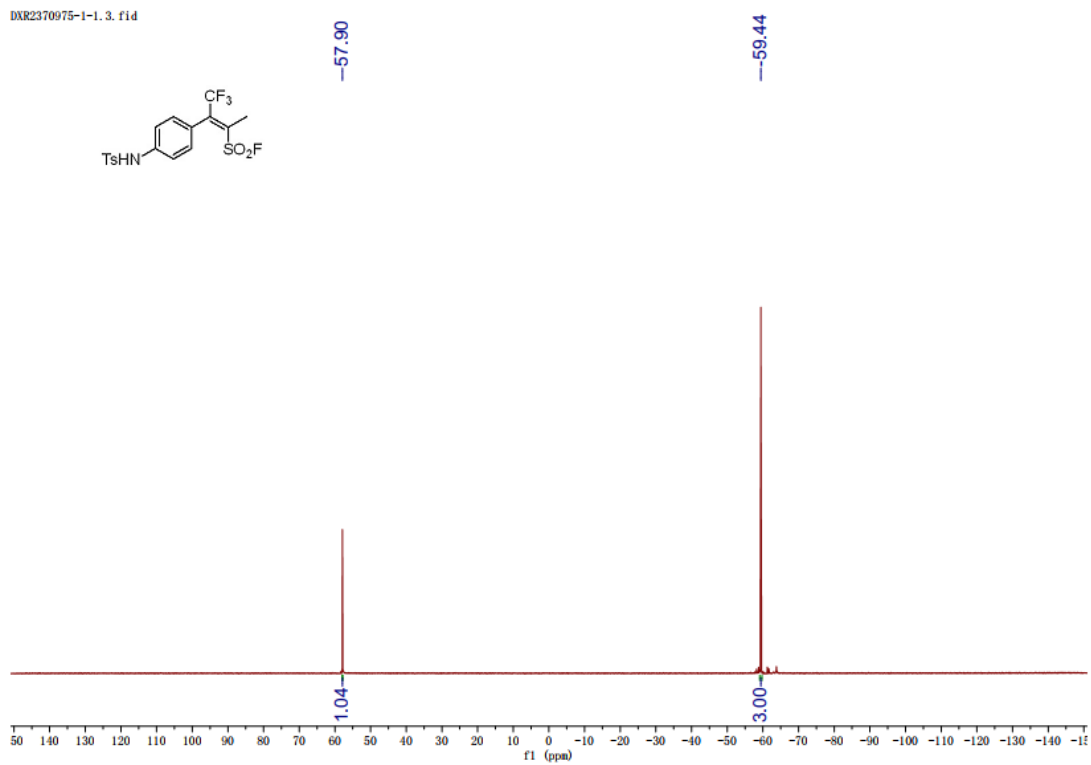

DXR2370978B-1.1.fid

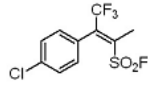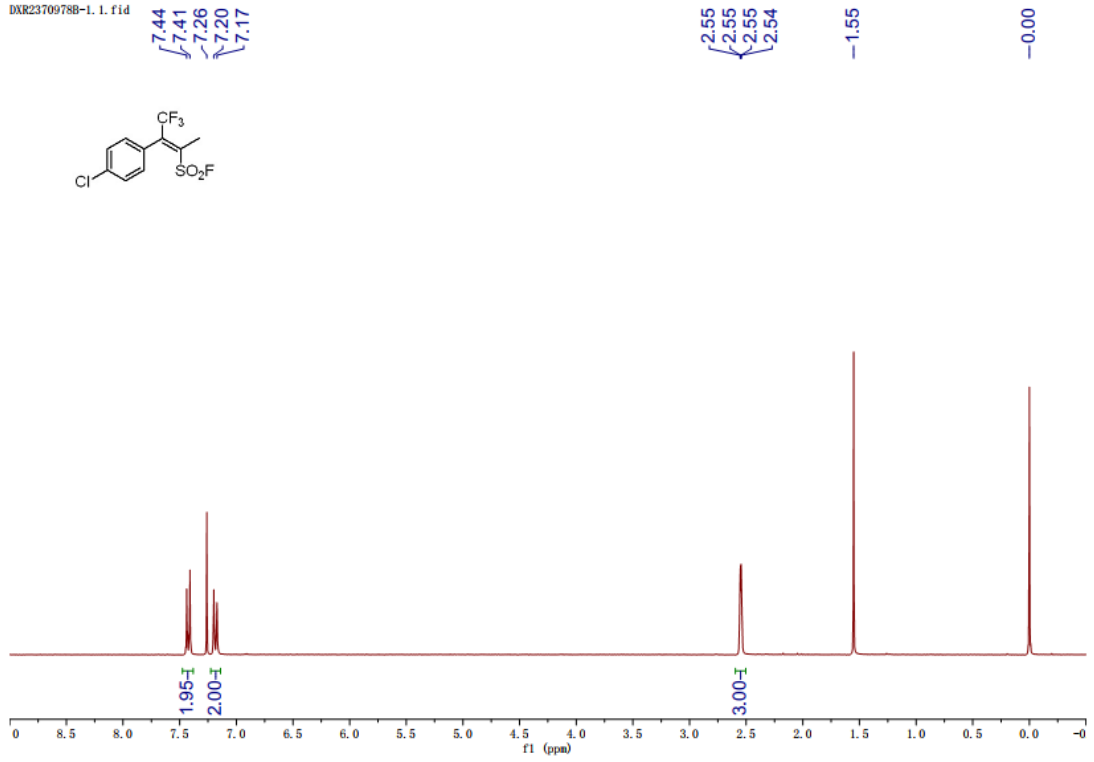

5f.2.fid

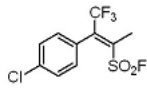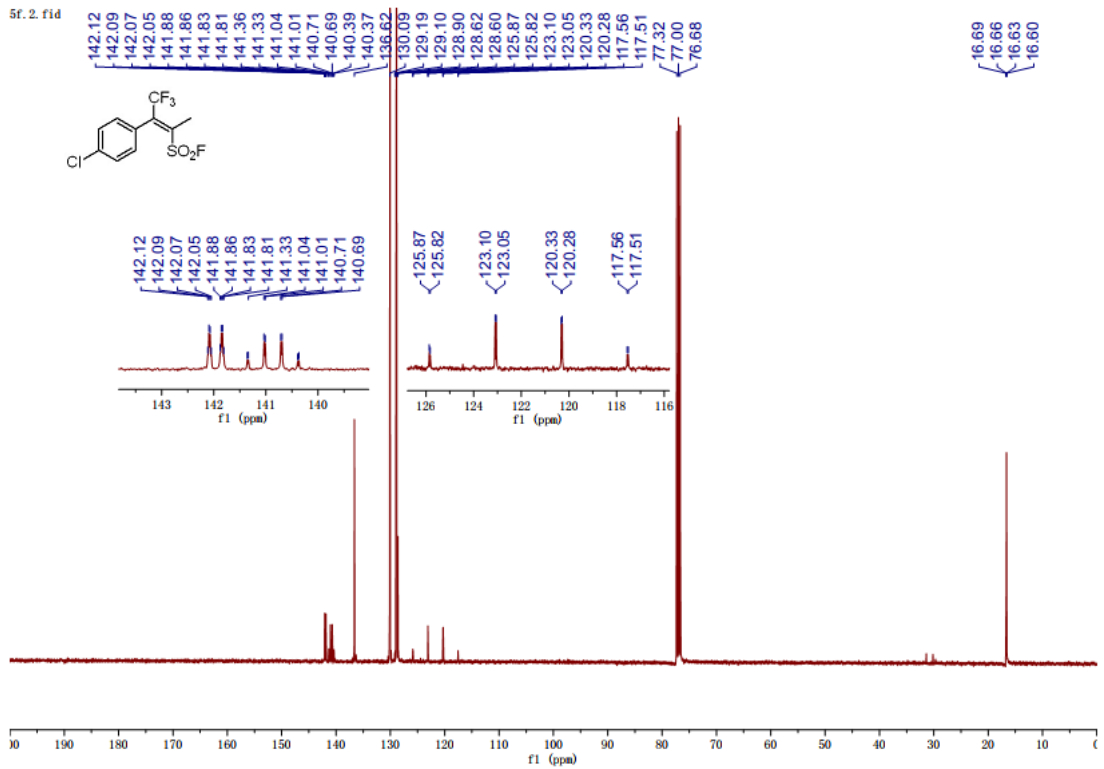

DIR2370978B-1.3.fid

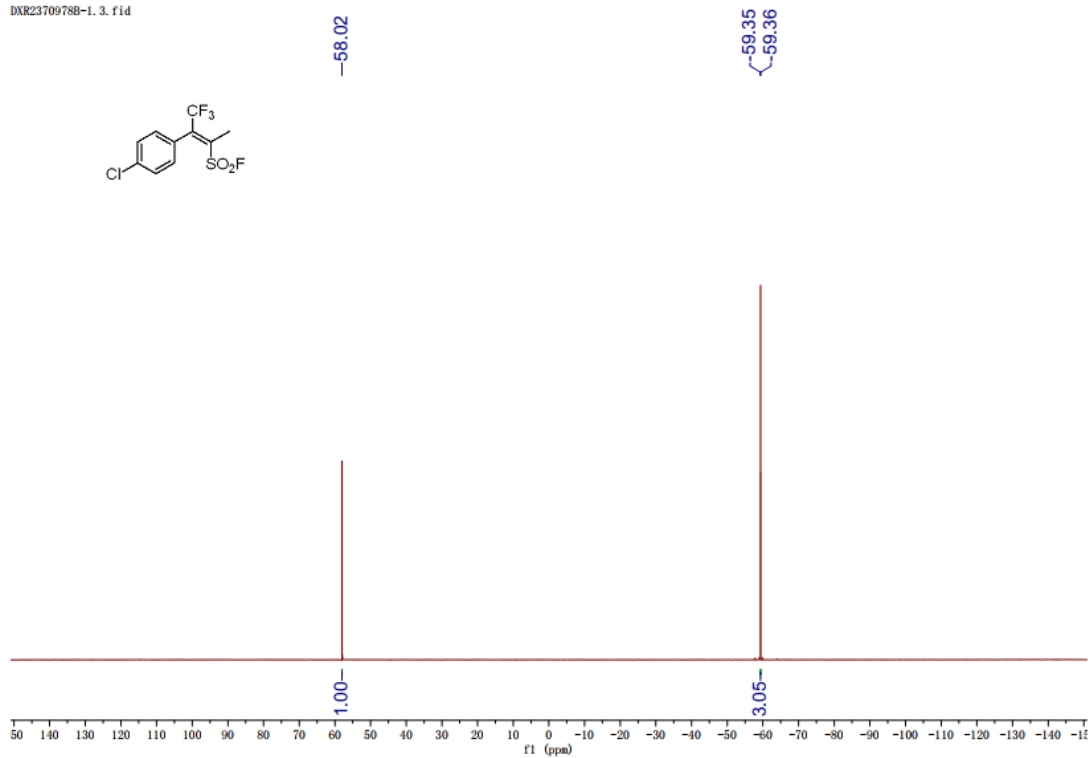

DIR2370976B-1.1.fid

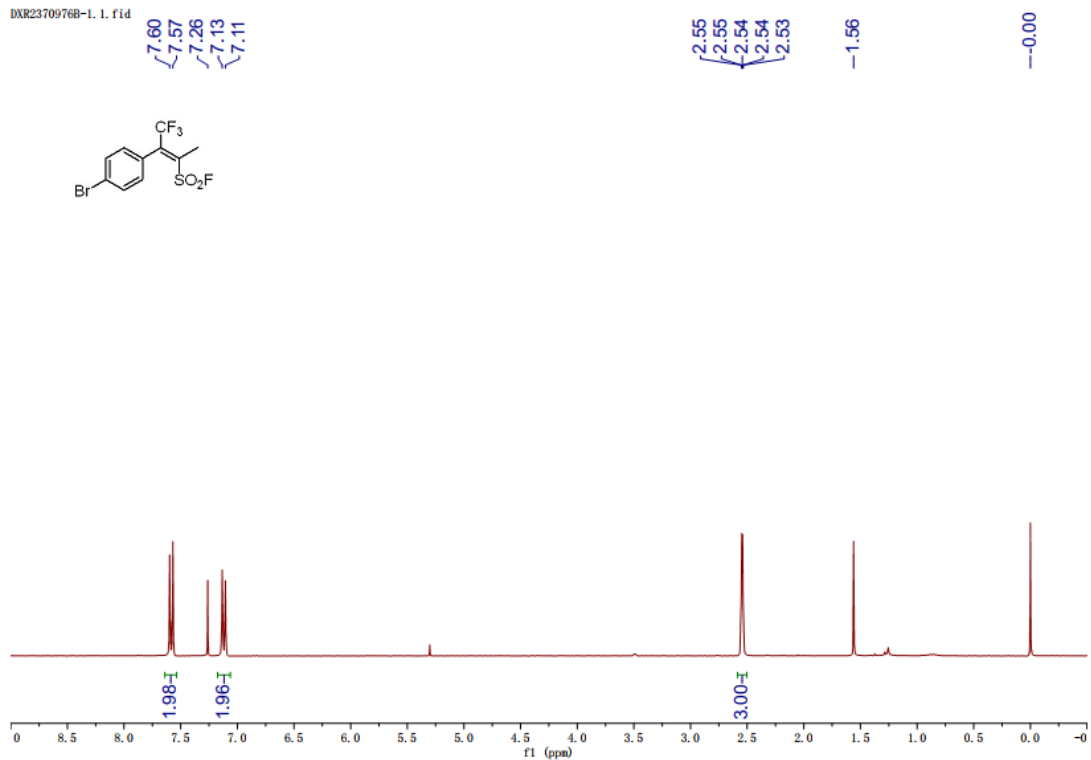

DIR2370977B-1C. 2. fid

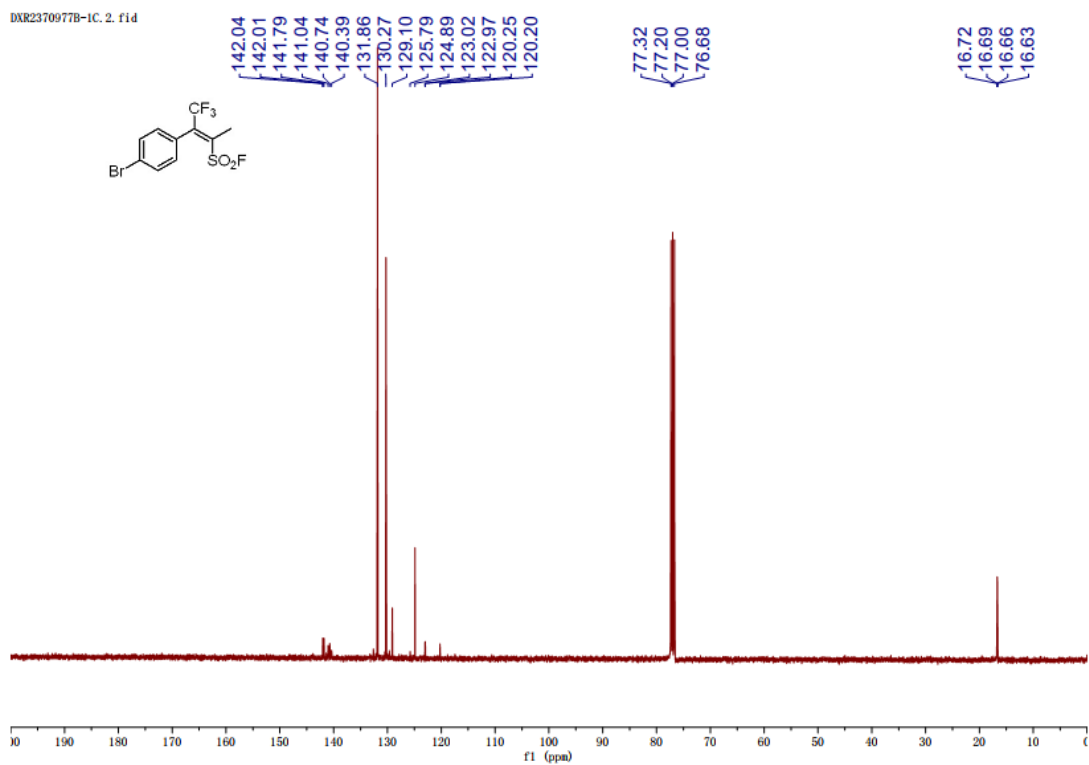

DIR2370976B-1. 3. fid

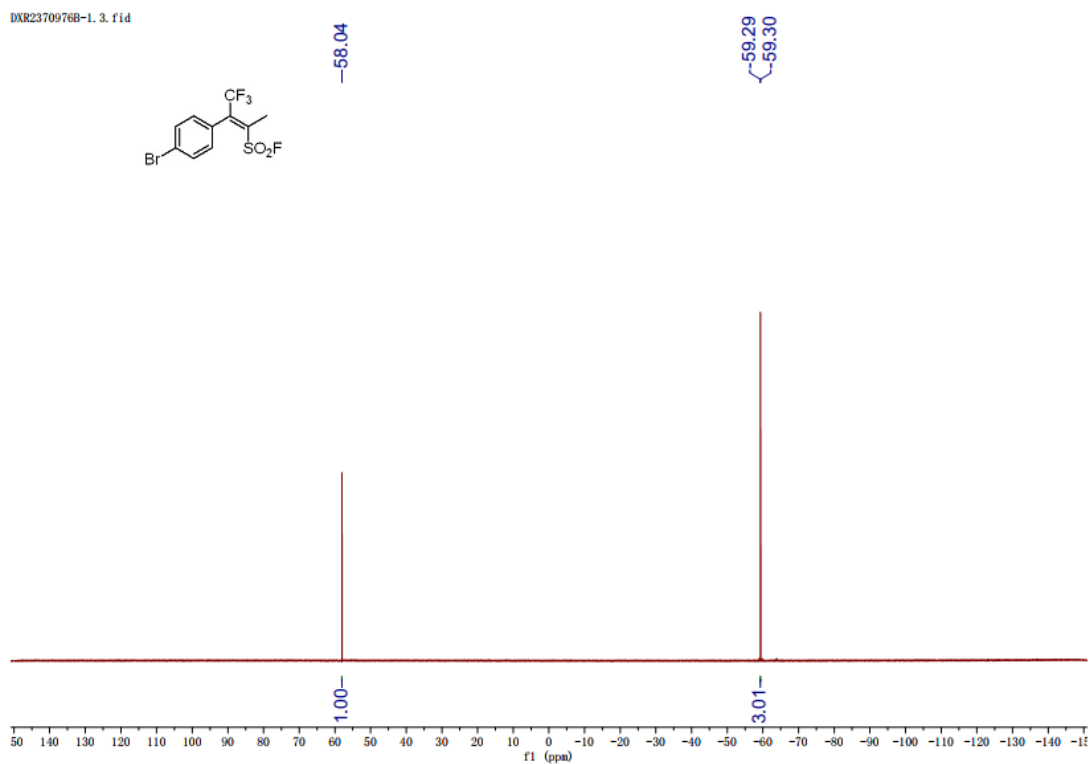

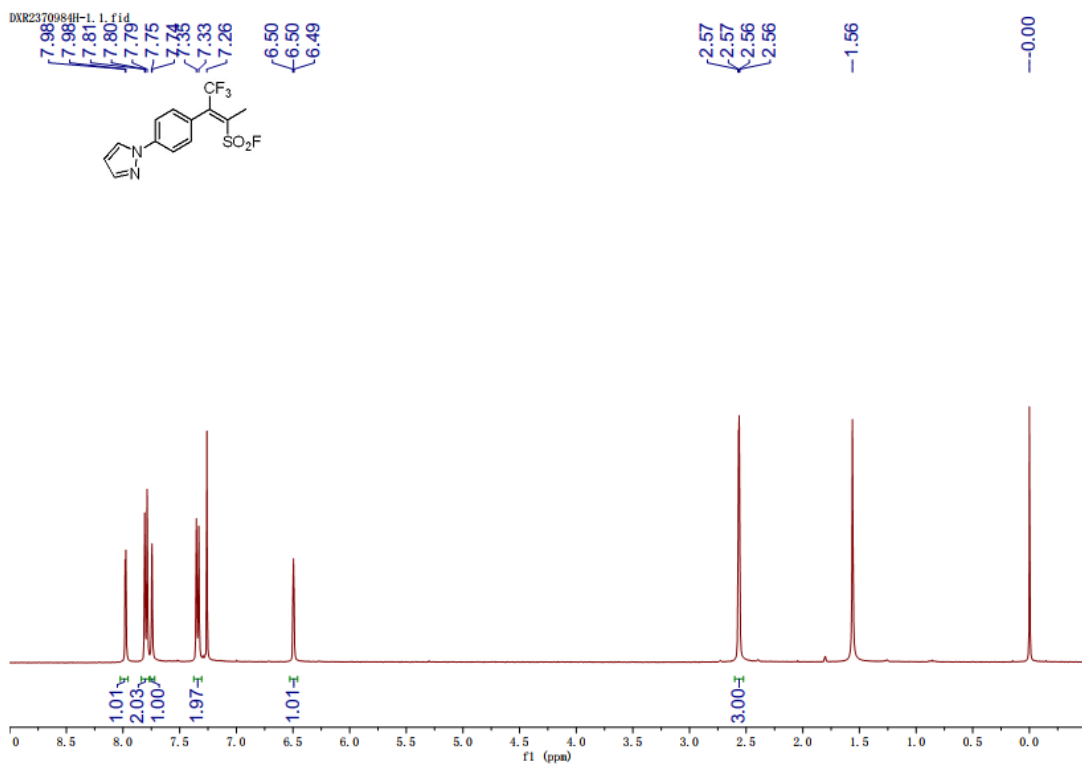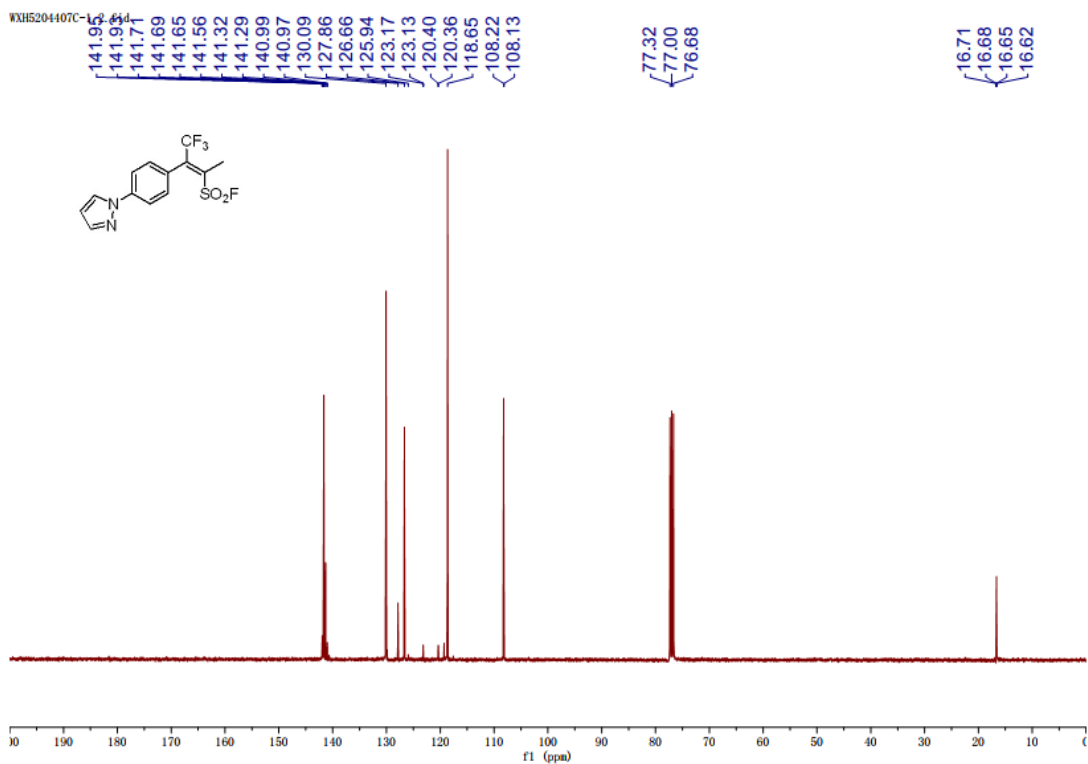

DIR2370984H-1.3.fid

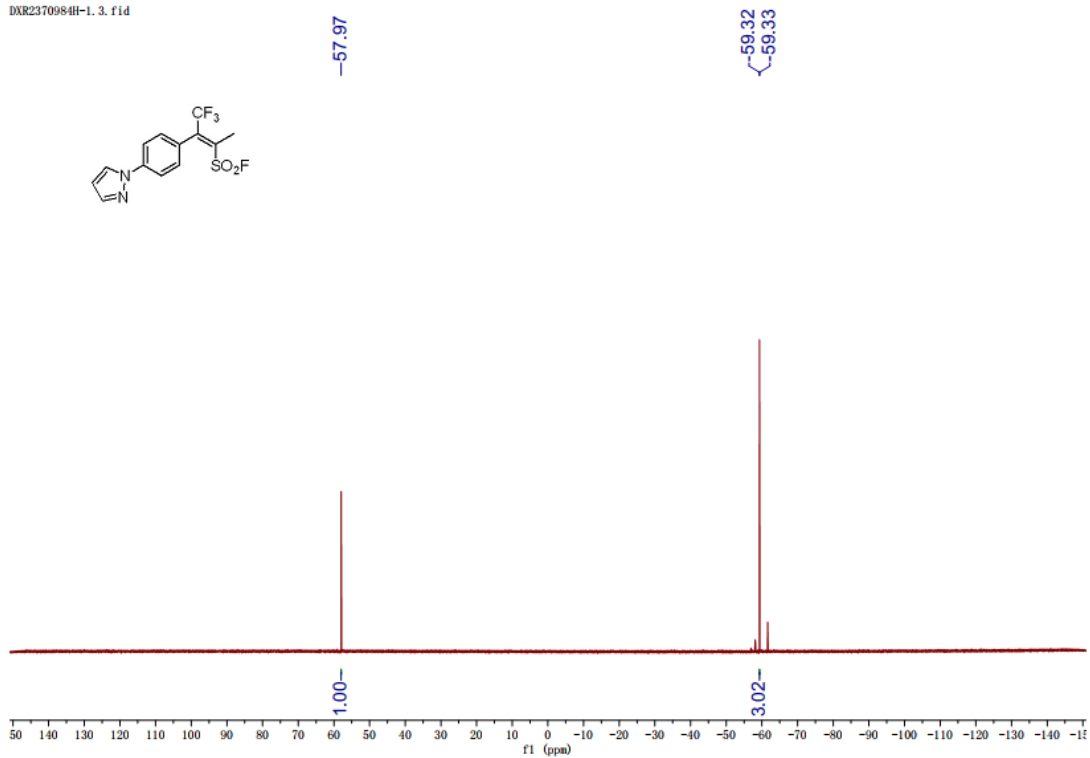

J.1.fid

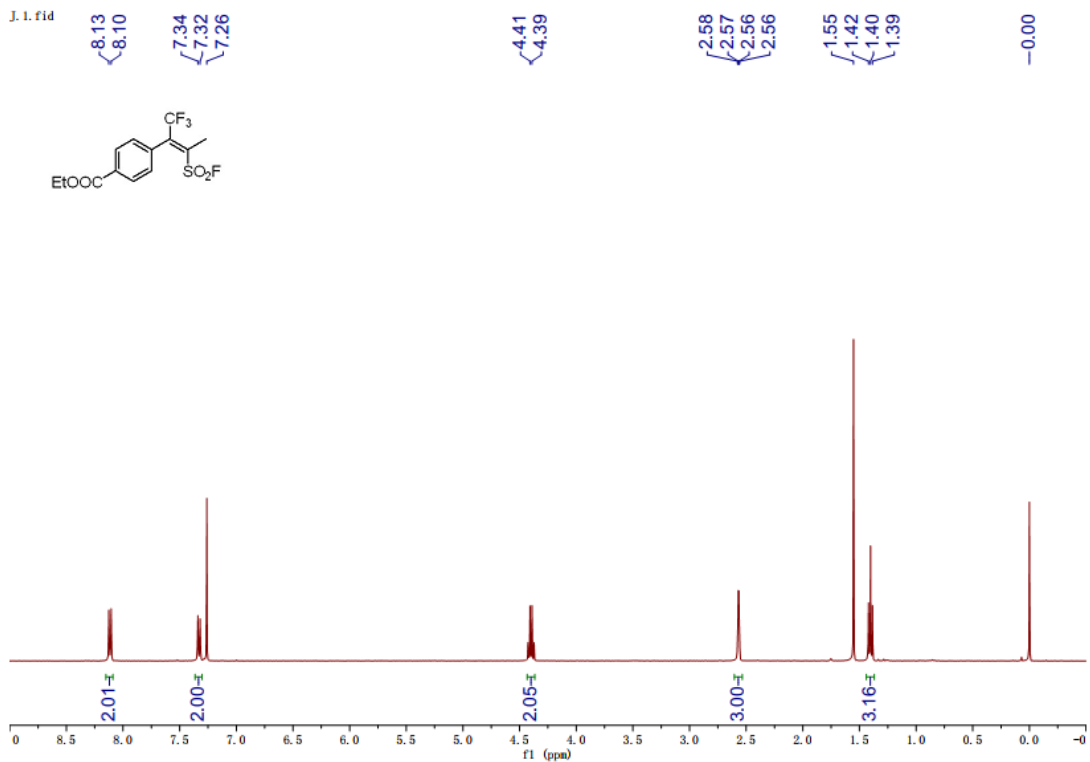

DIR23709841-1. 2. fid

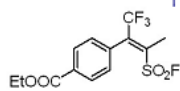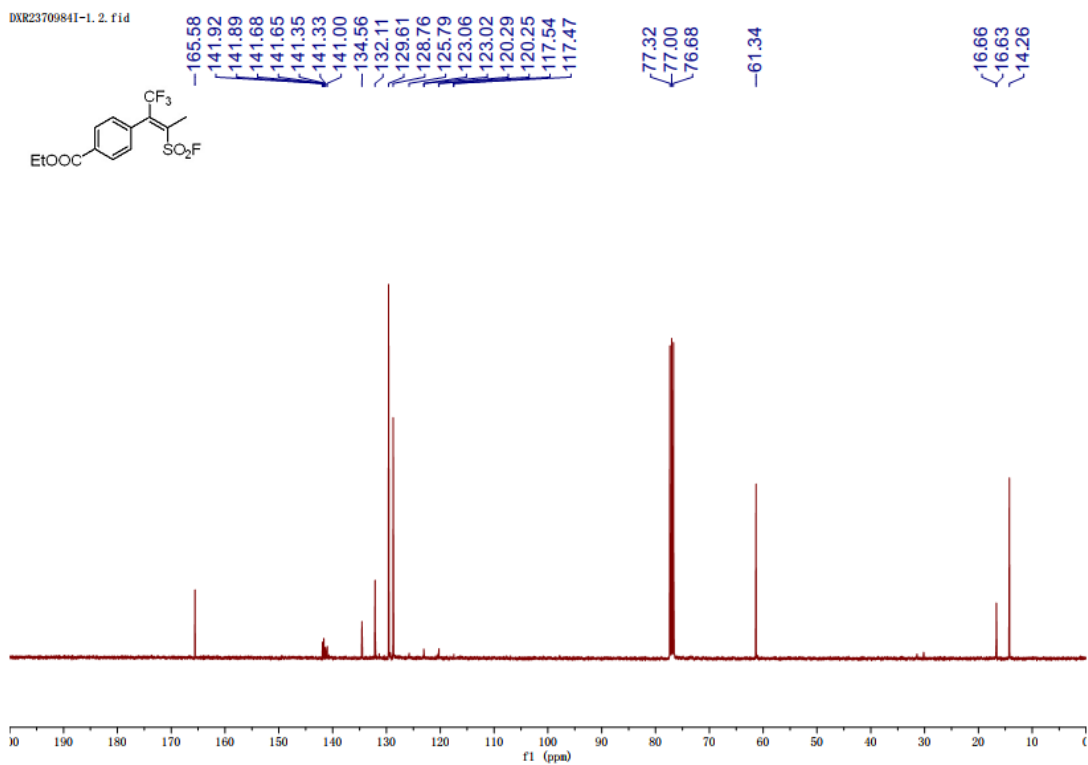

DIR23709841-1. 3. fid

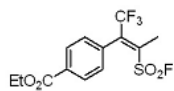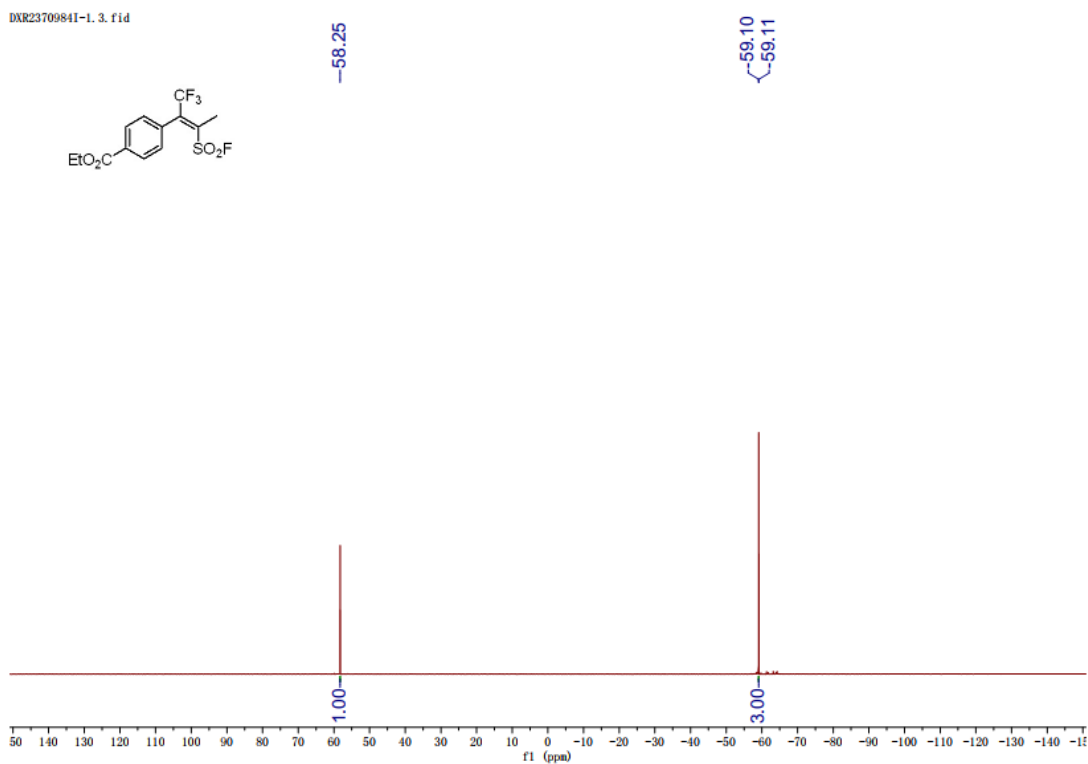

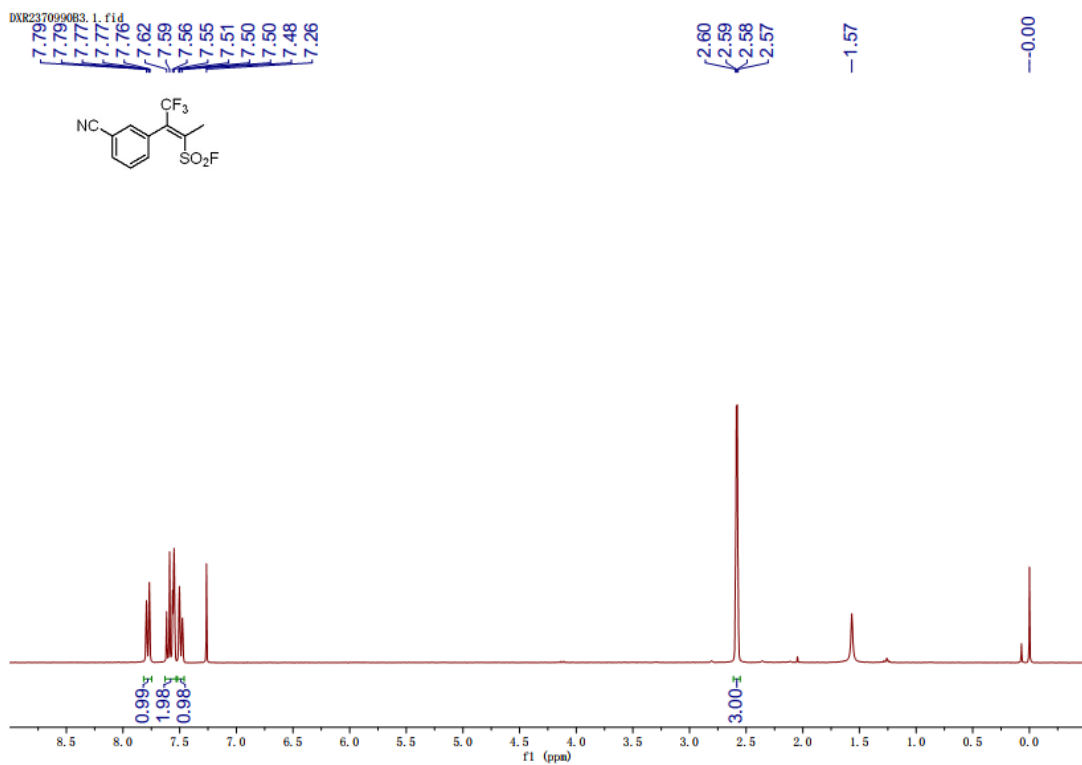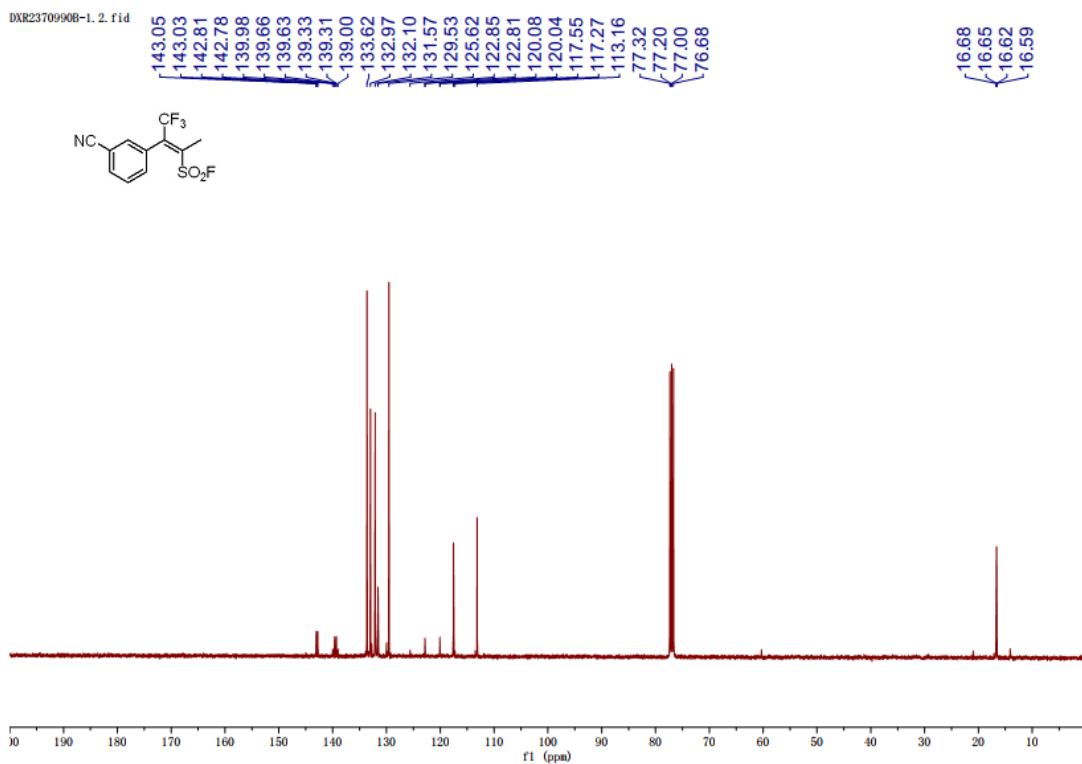



DIR2370990B-1.3.fid

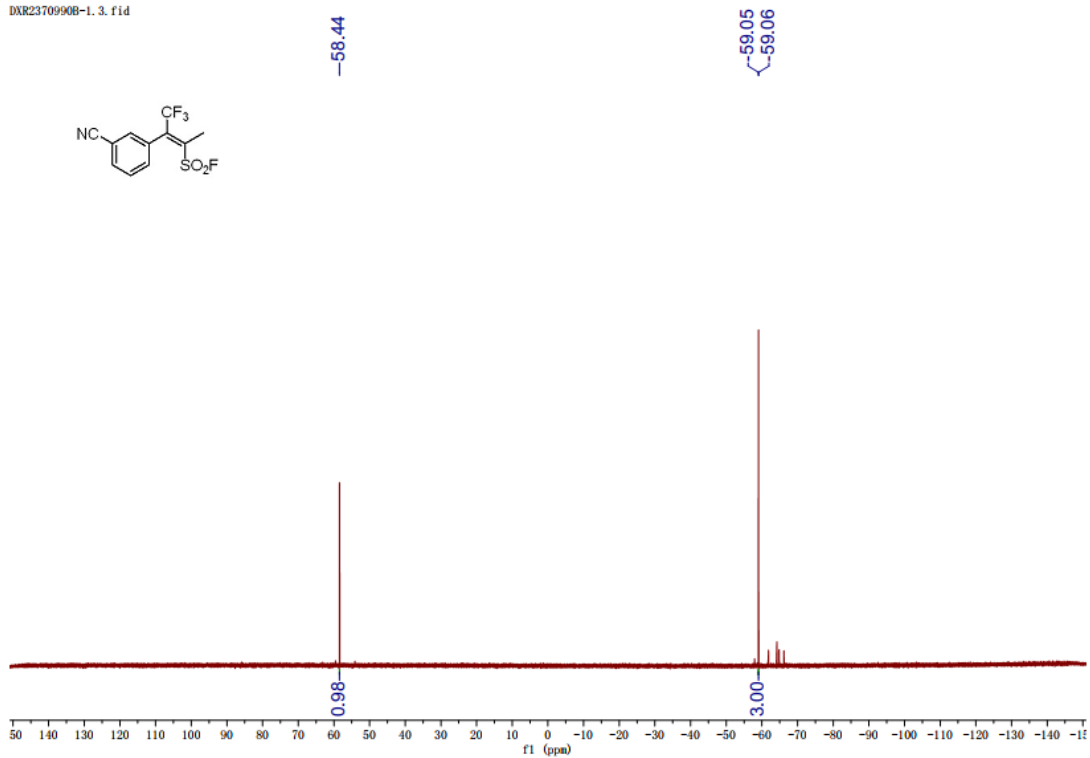

DIR2370990A-1-1.fid

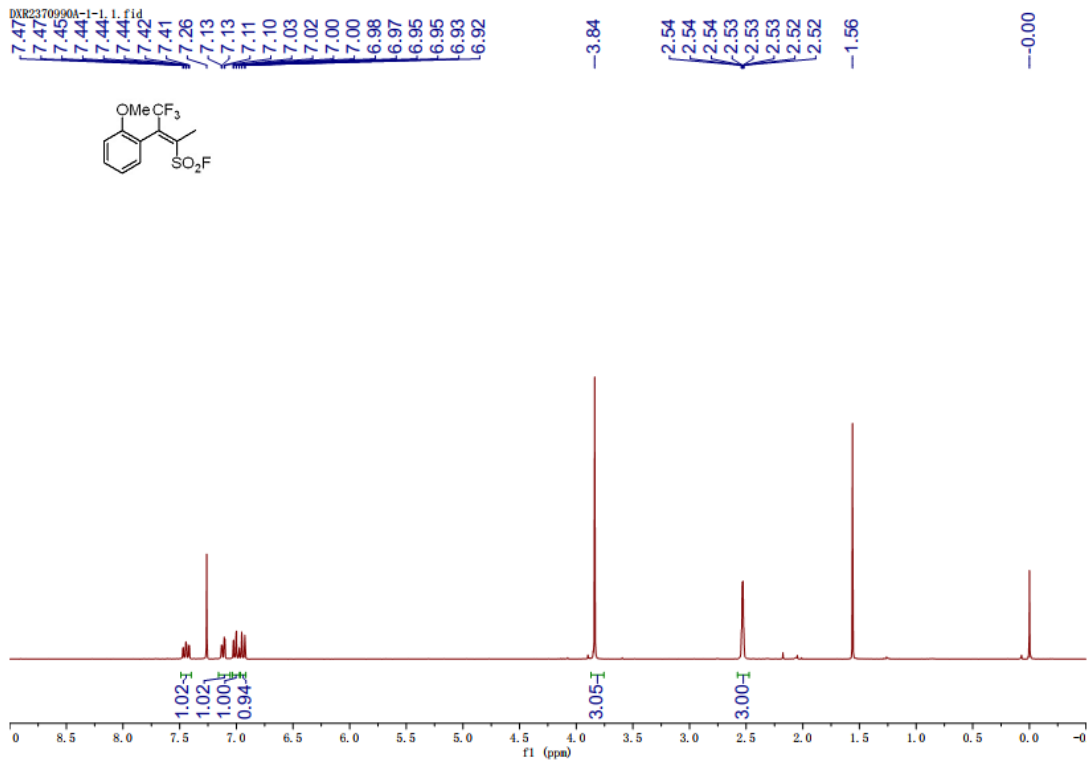

WXHS204416D-1.2.fid

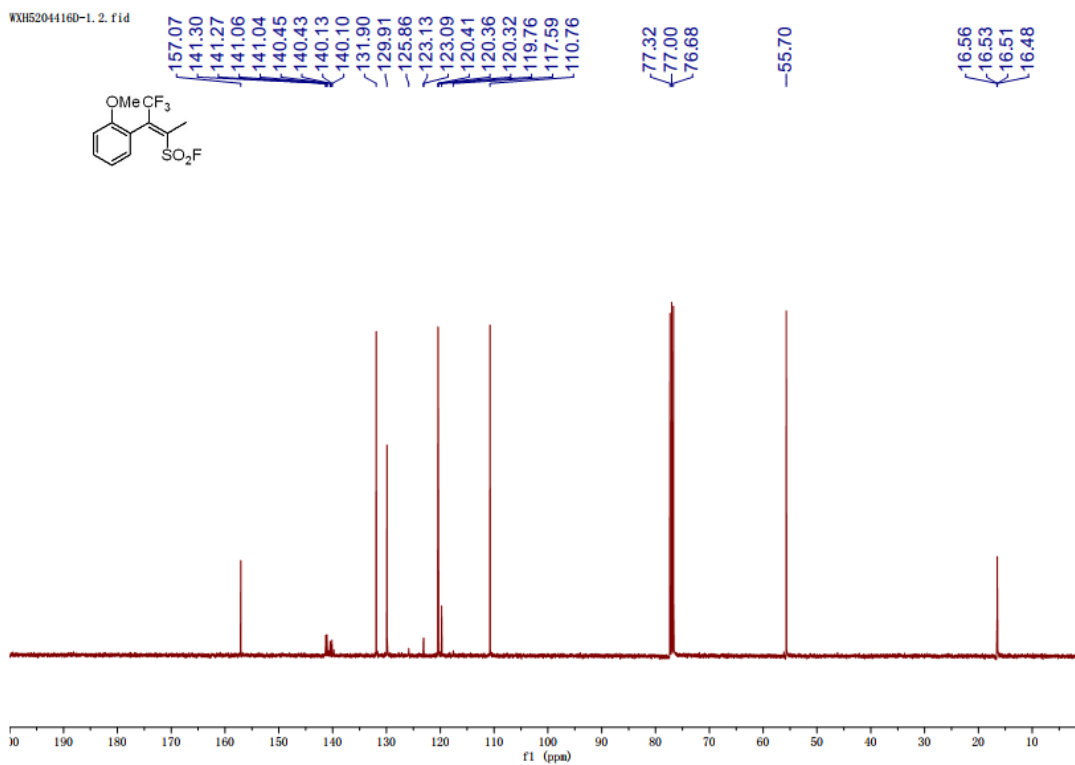

DXR2370990A-1-1.3.fid

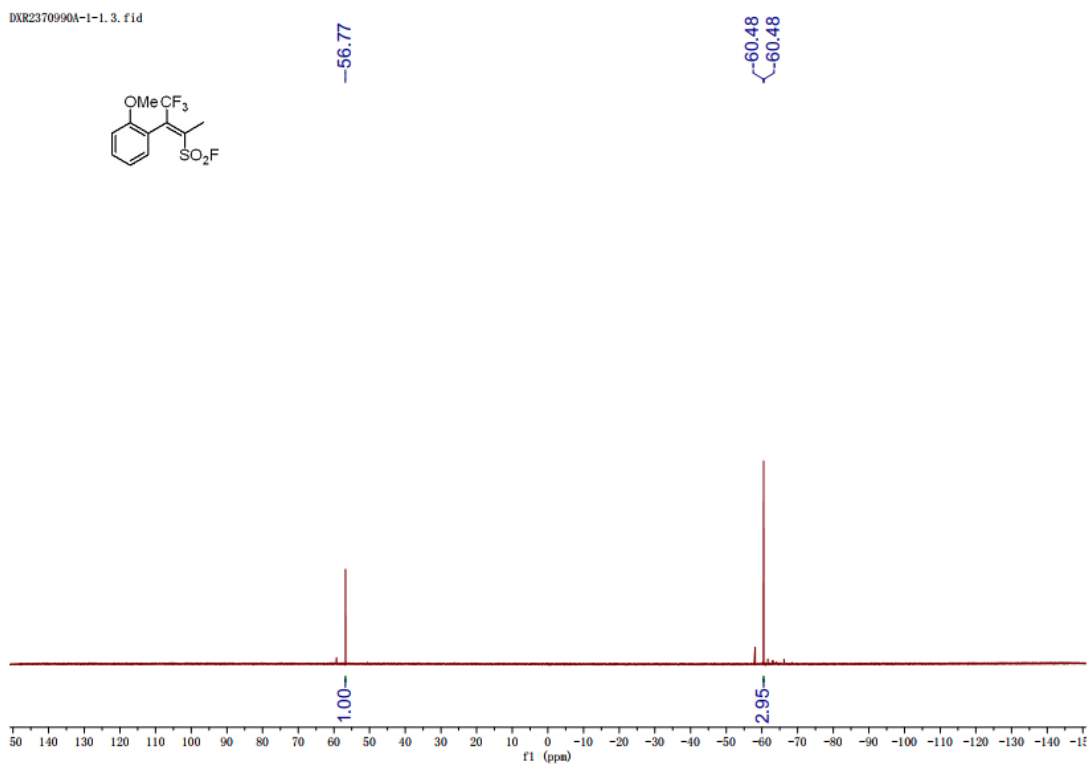

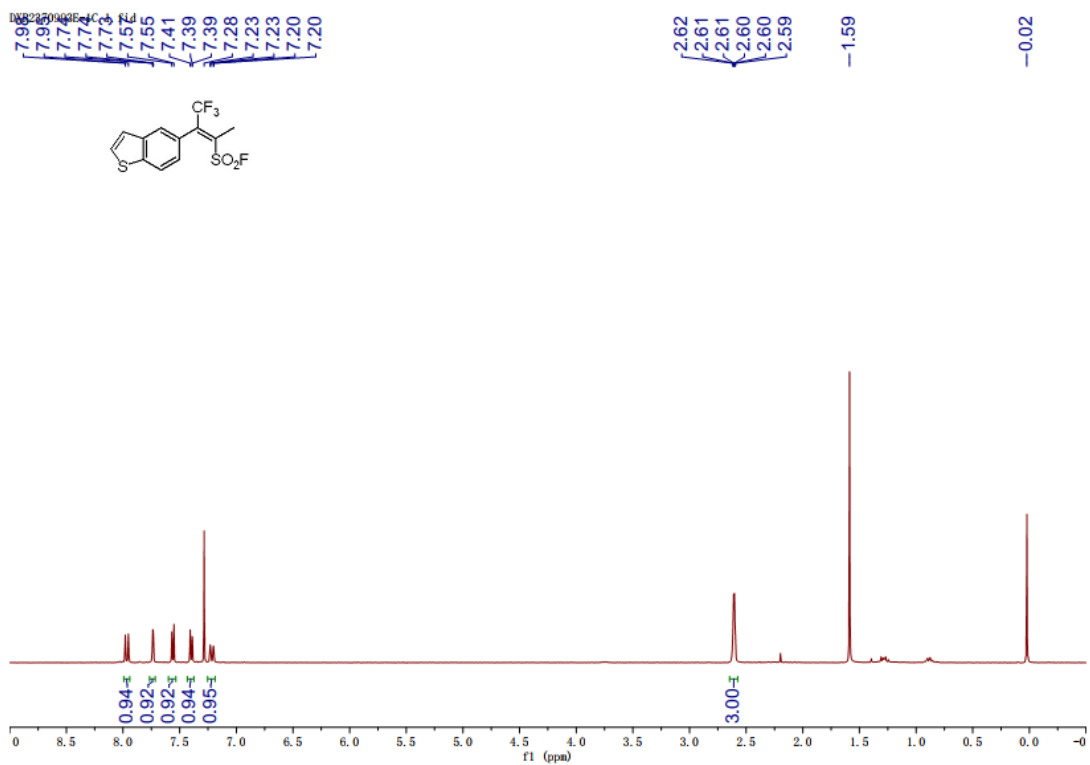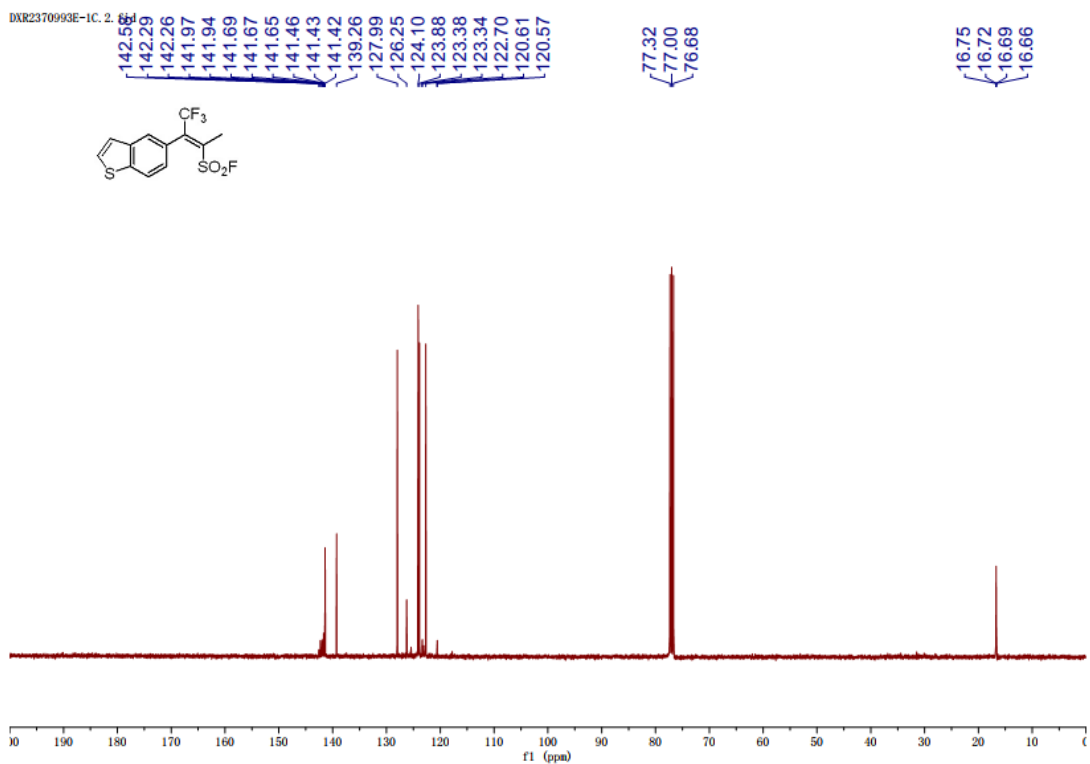

DIR2370993e--1.3.fid

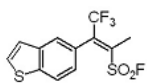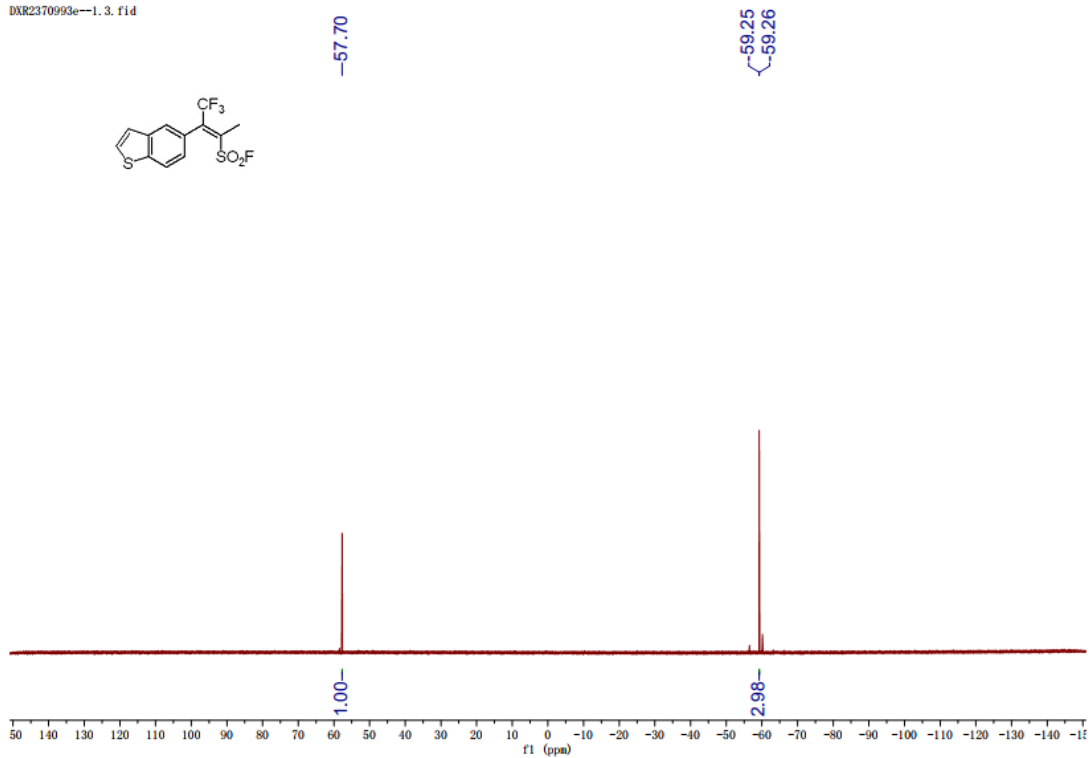

DIR2370988D-1.1.fid

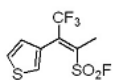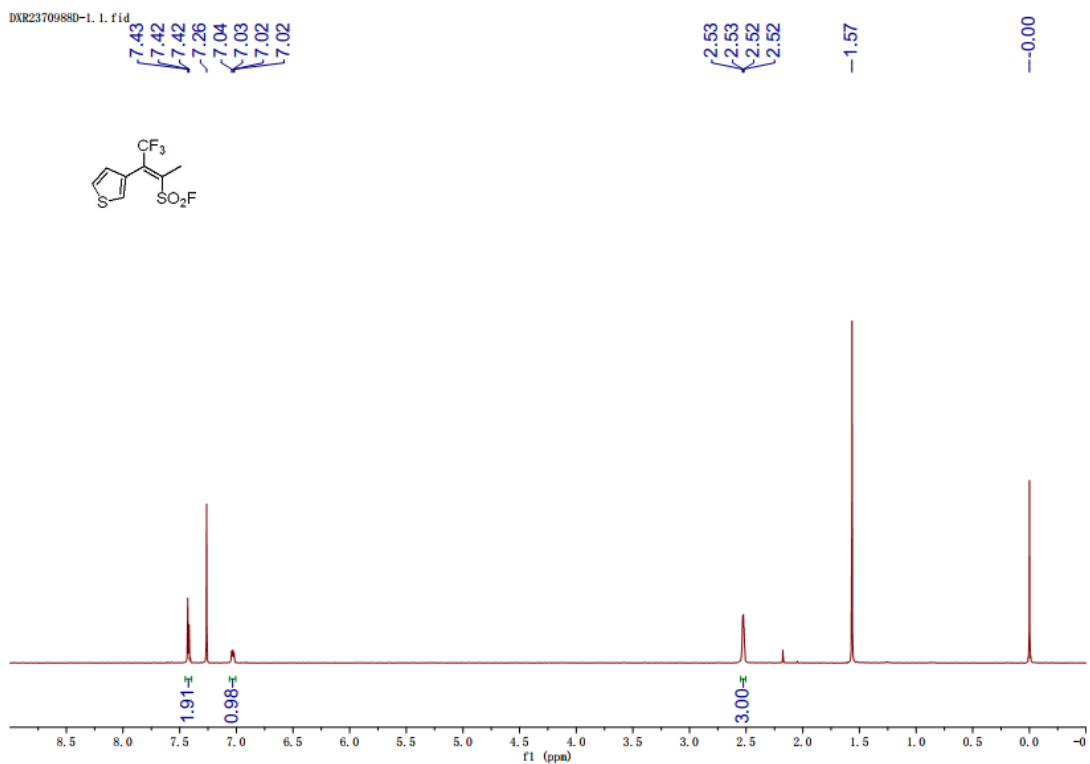

DIR2370988D-1C. 2. fid

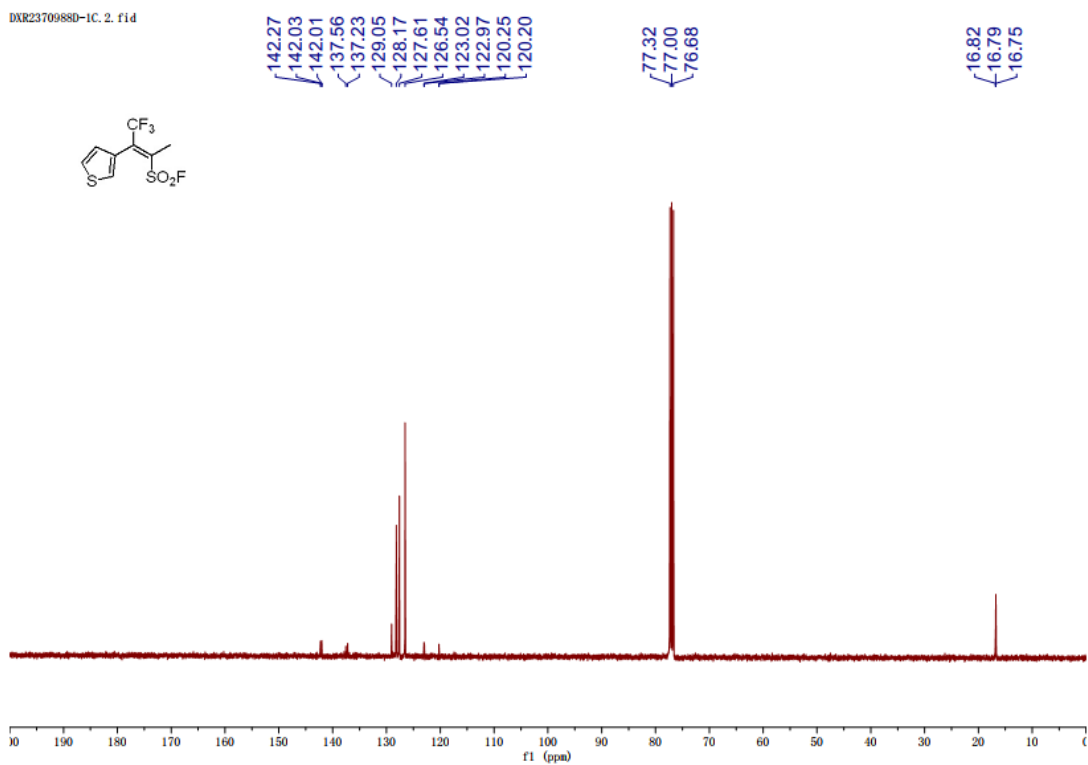

DIR2370988d-1. 3. fid

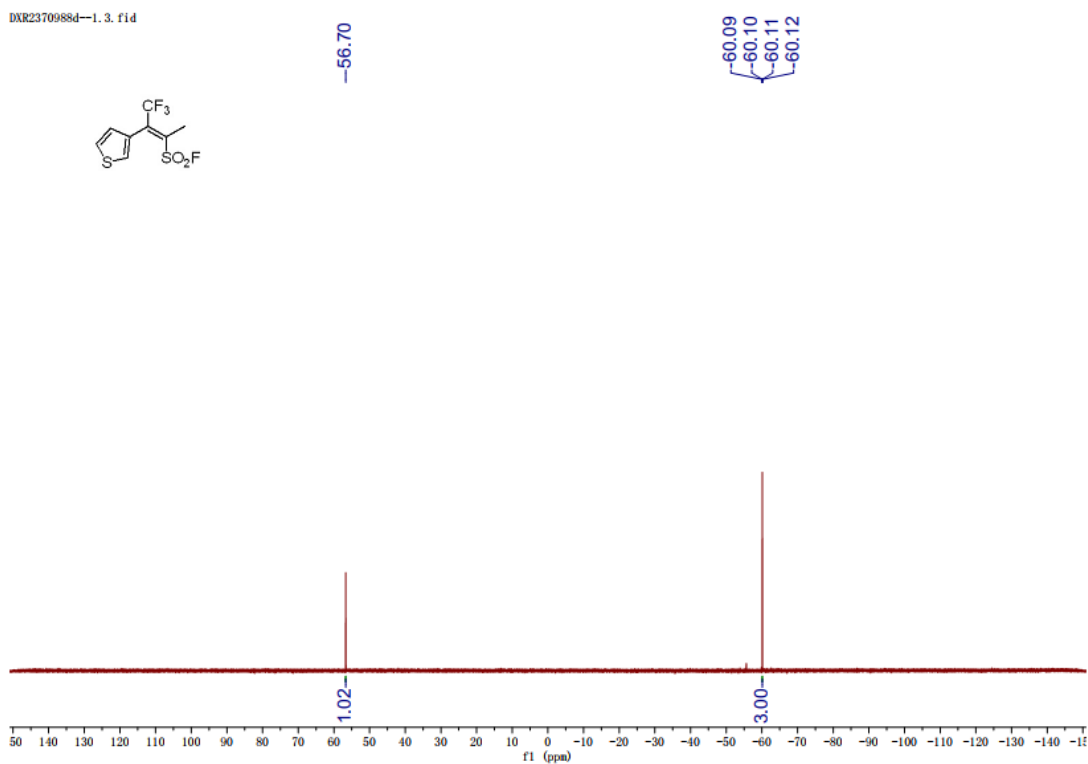

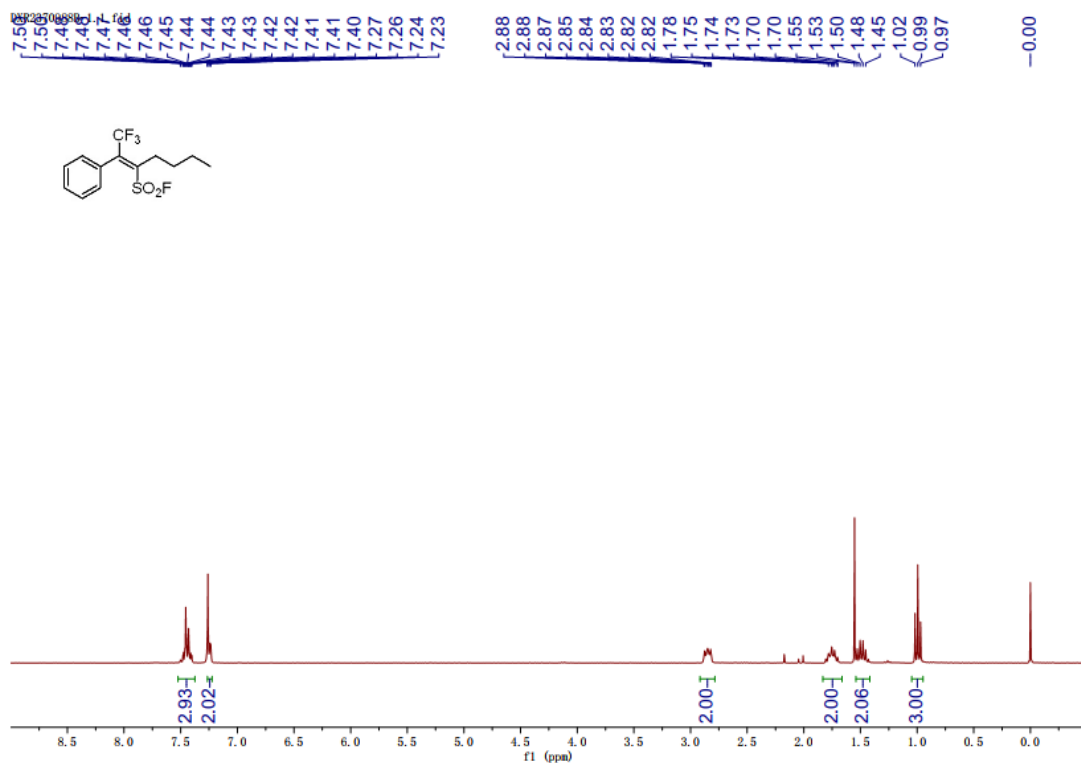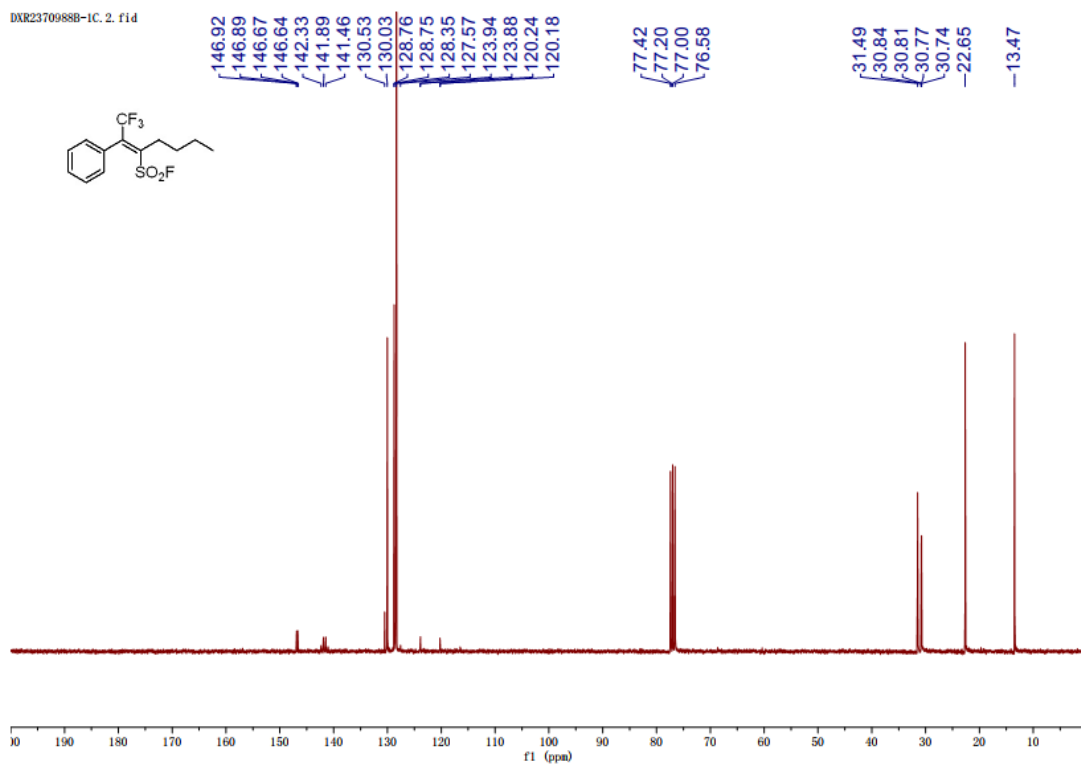

DIR2370988B-1.3.fid

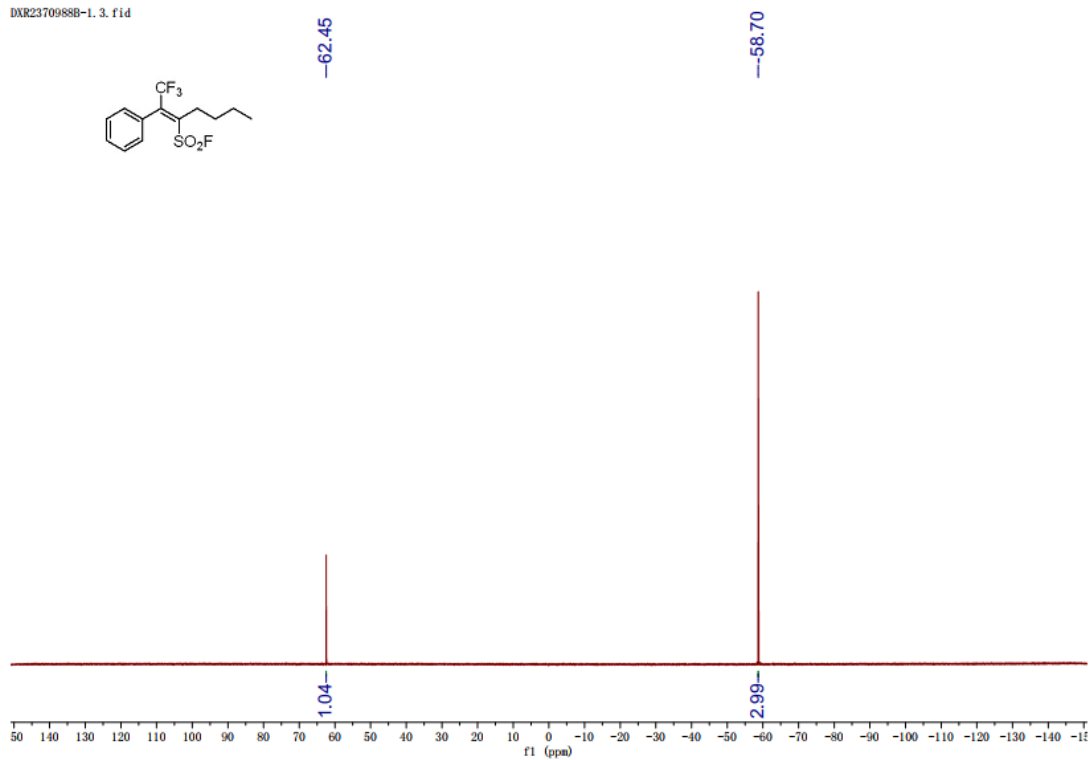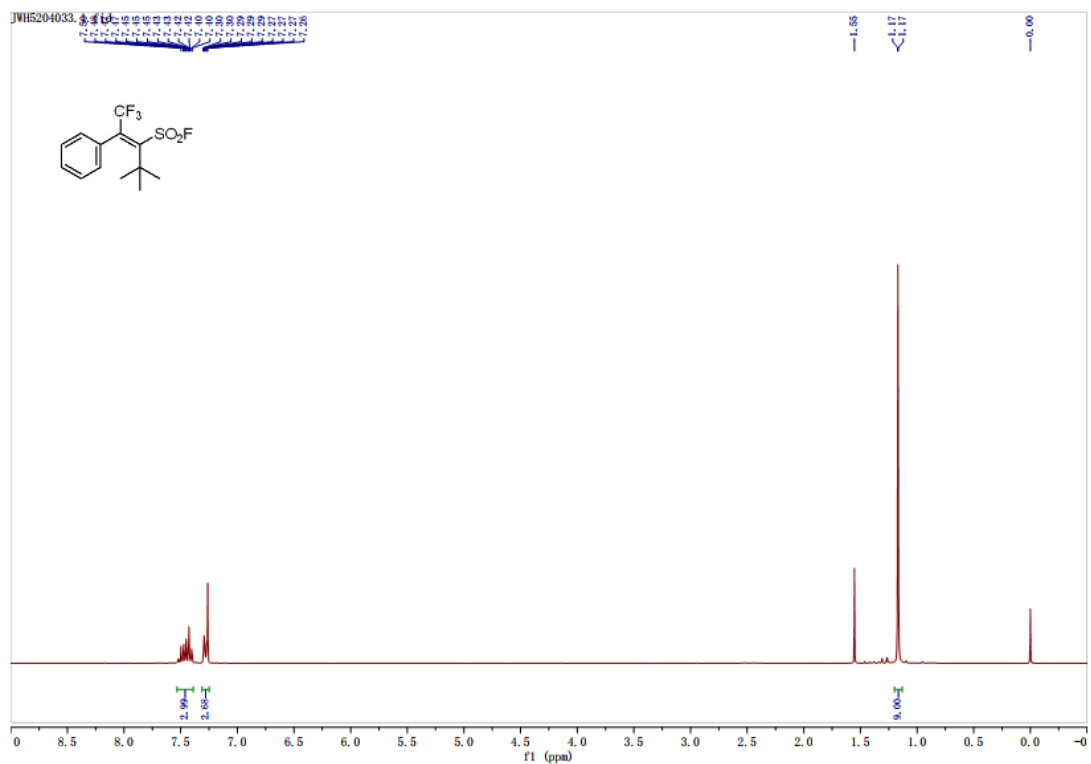

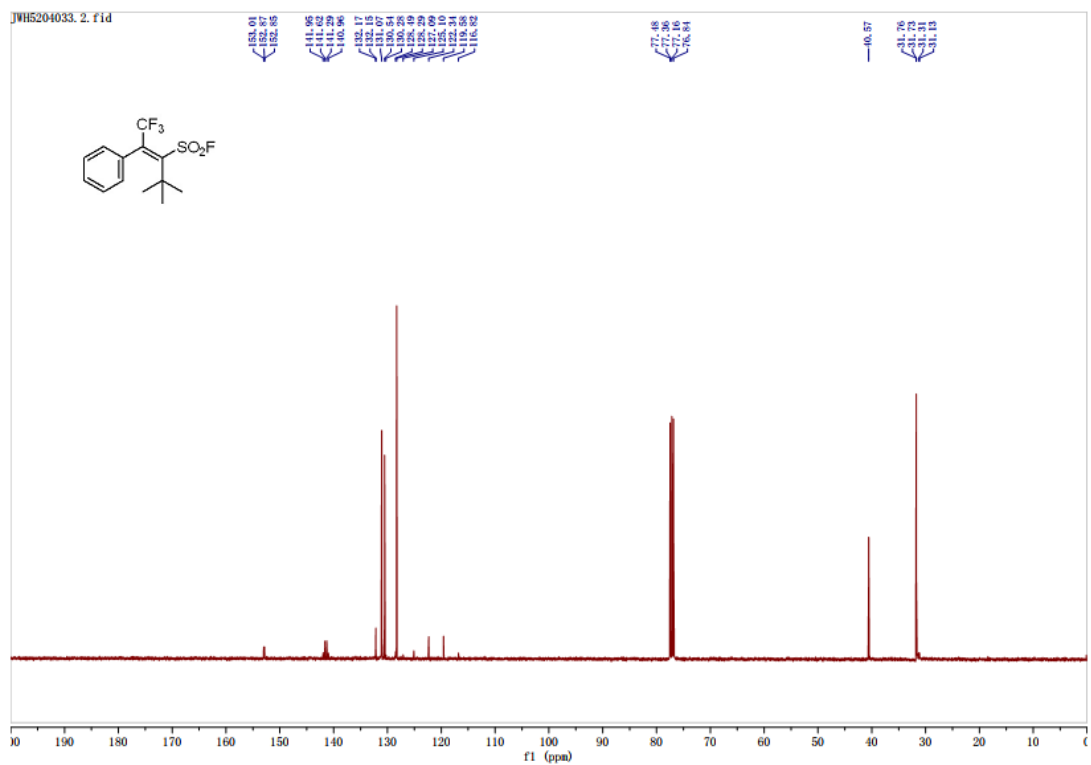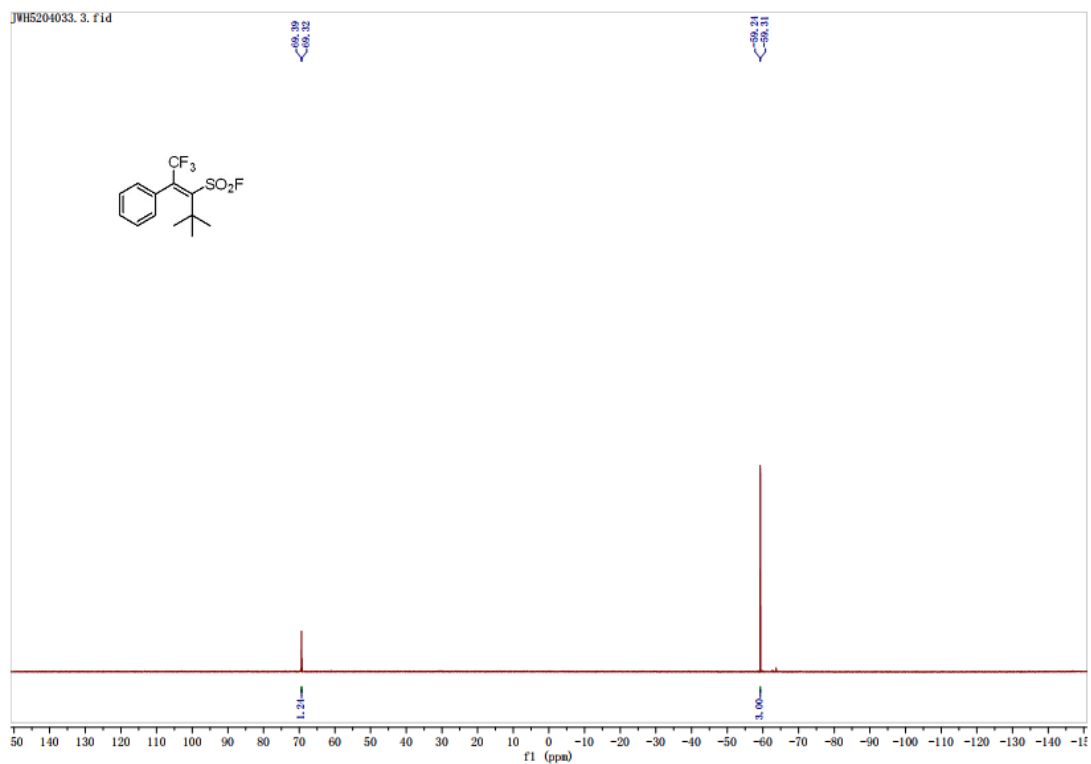



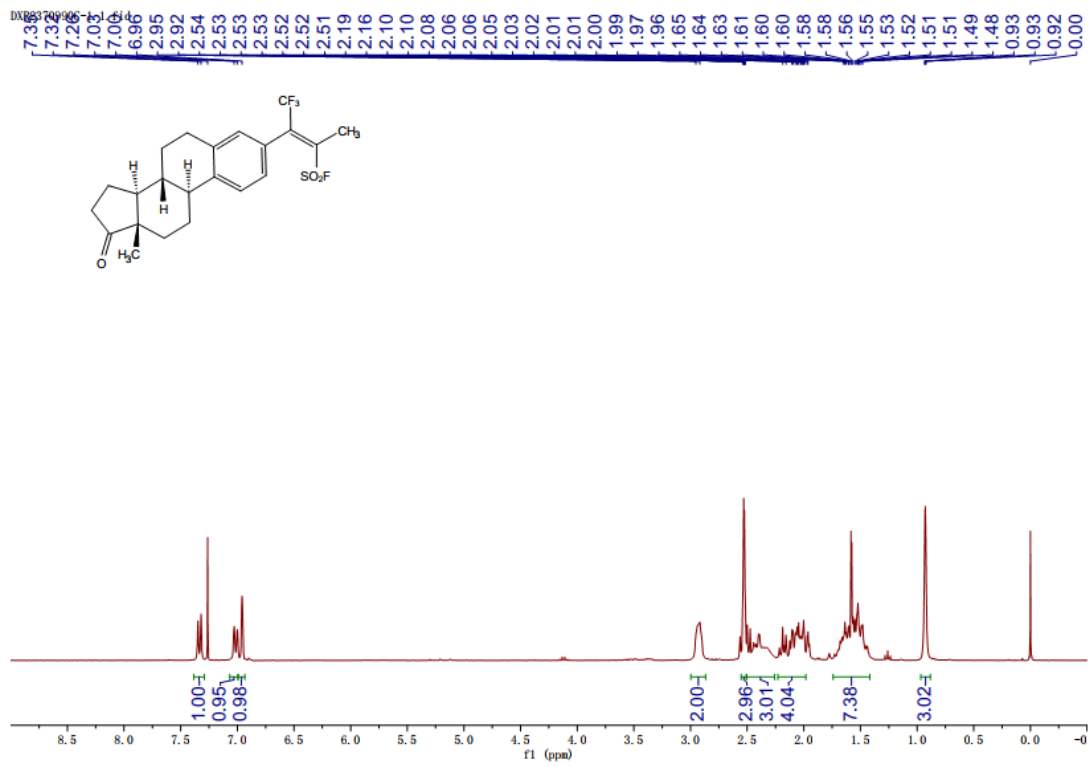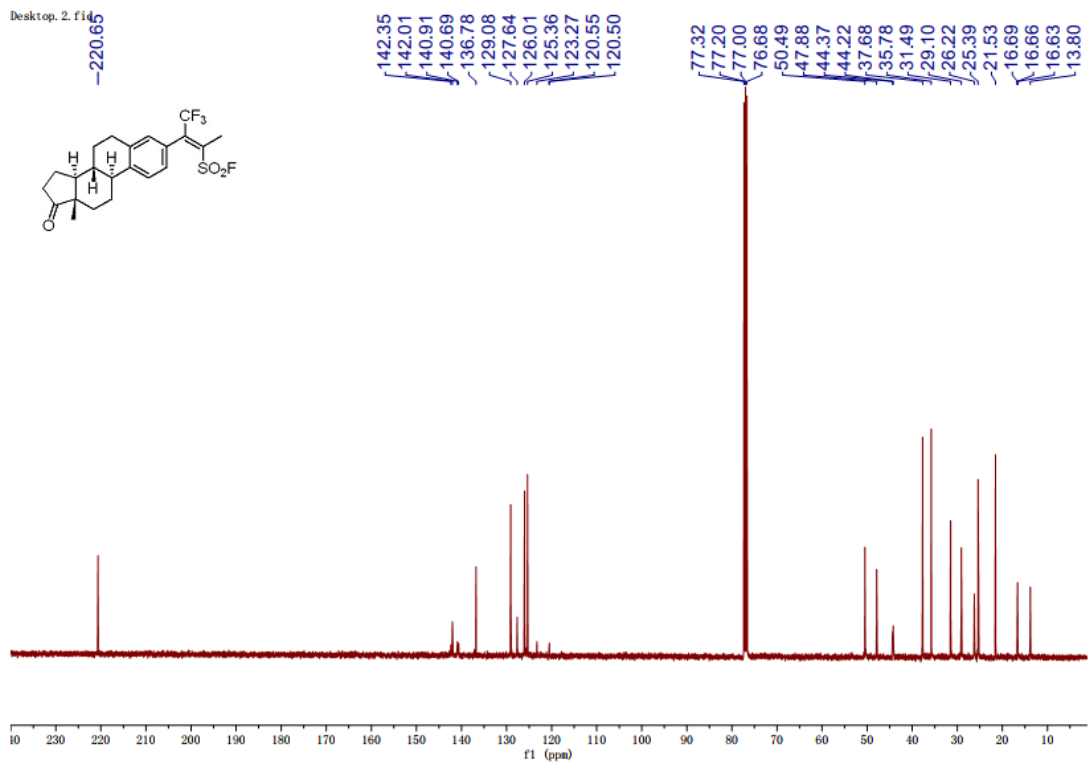

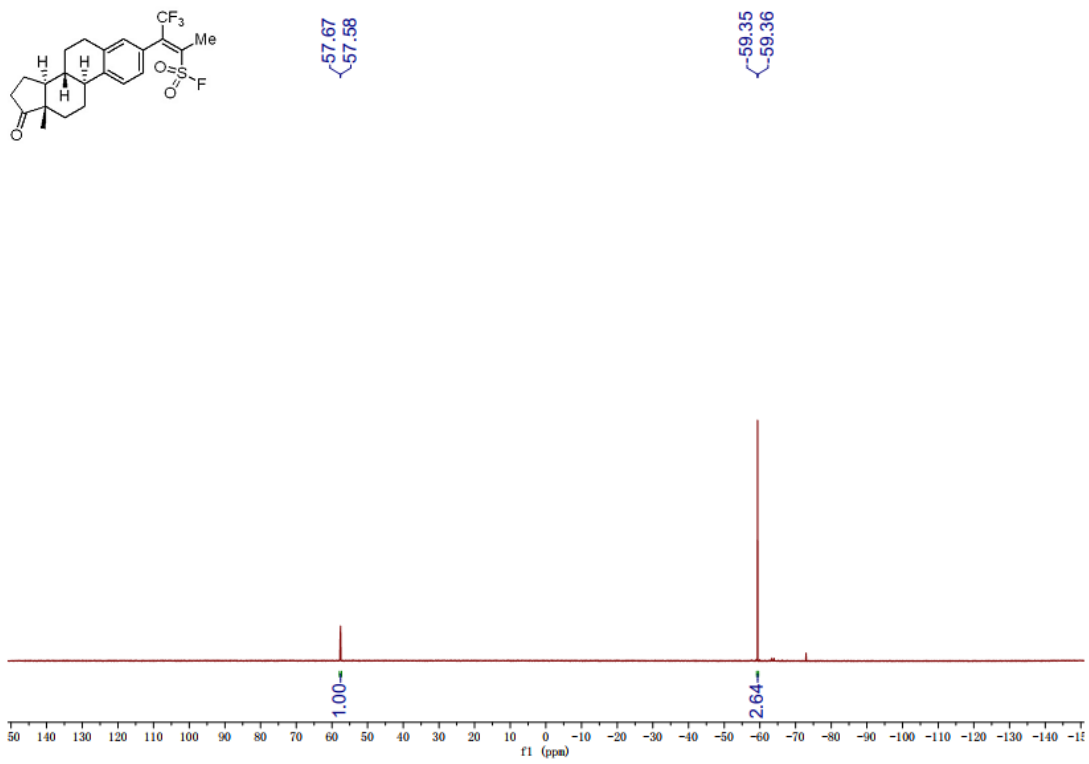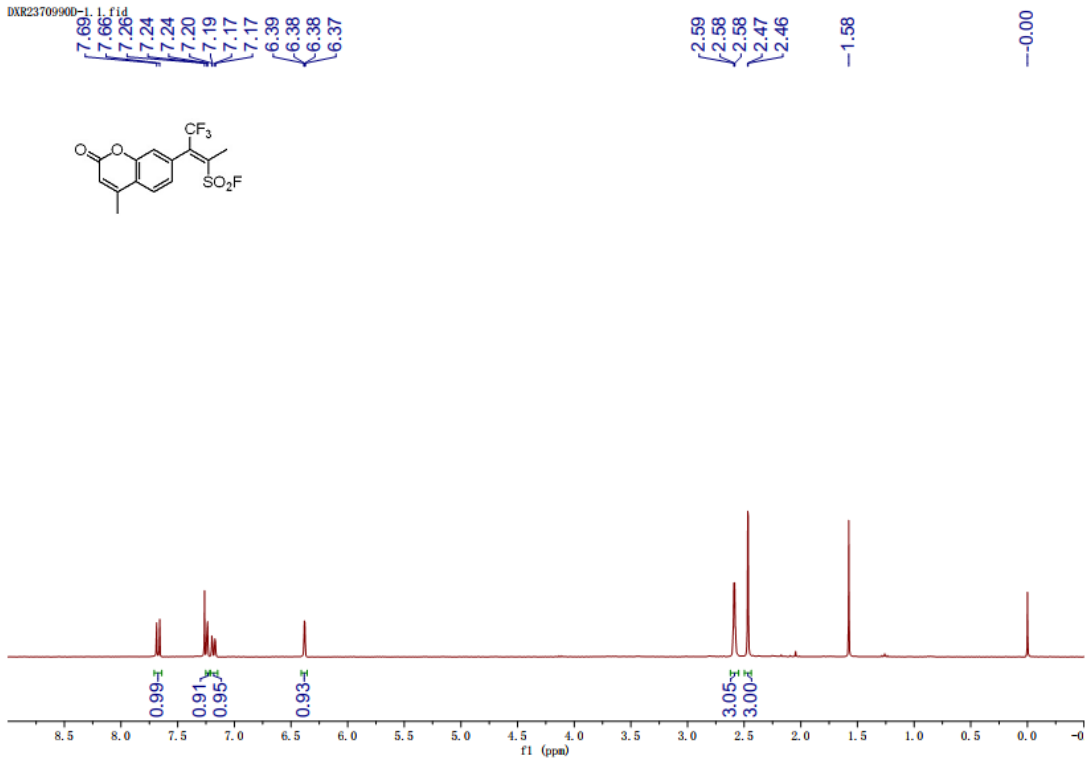

DIR23709900-1c. 2. fid

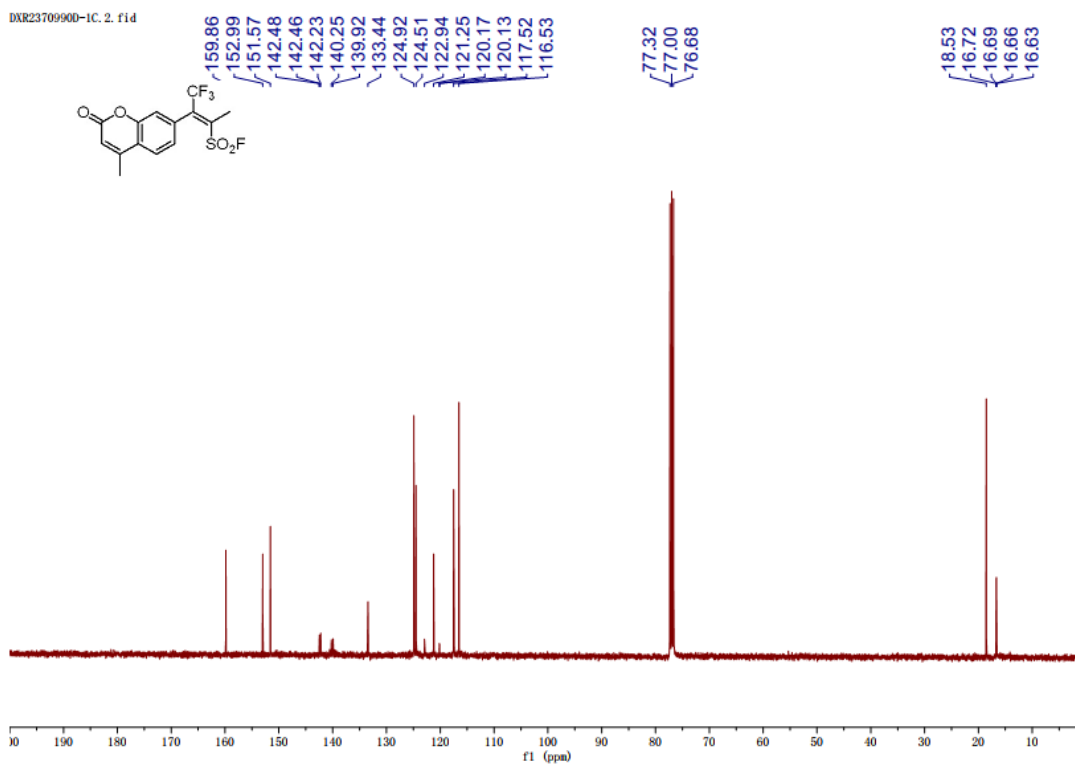

DIR23709900-1. 3. fid

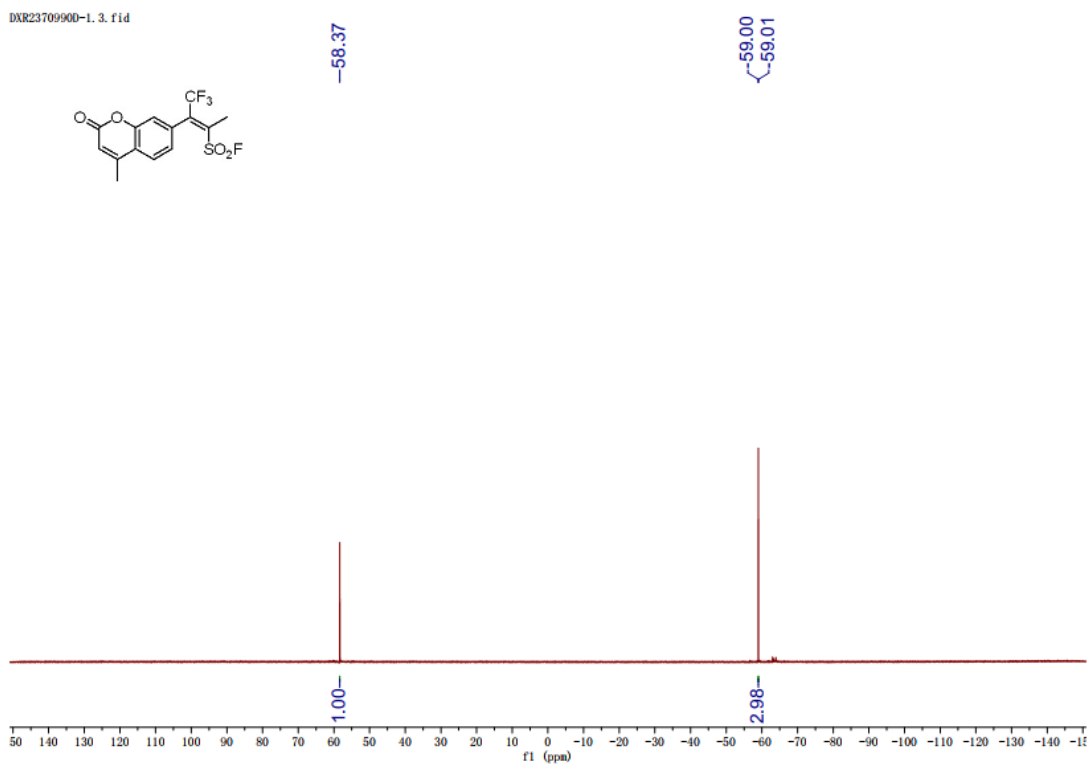

DIR2370985C-2.1.fid

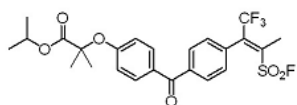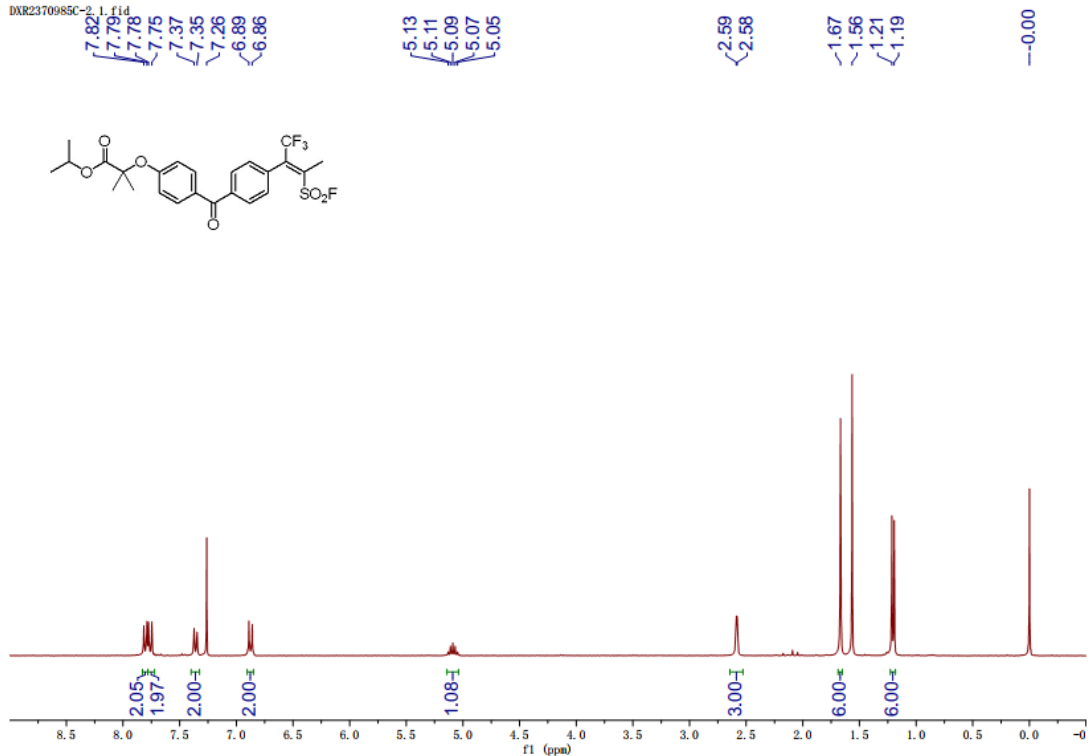

DIR2370985C-2.2.fid

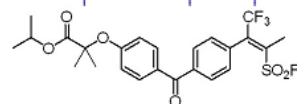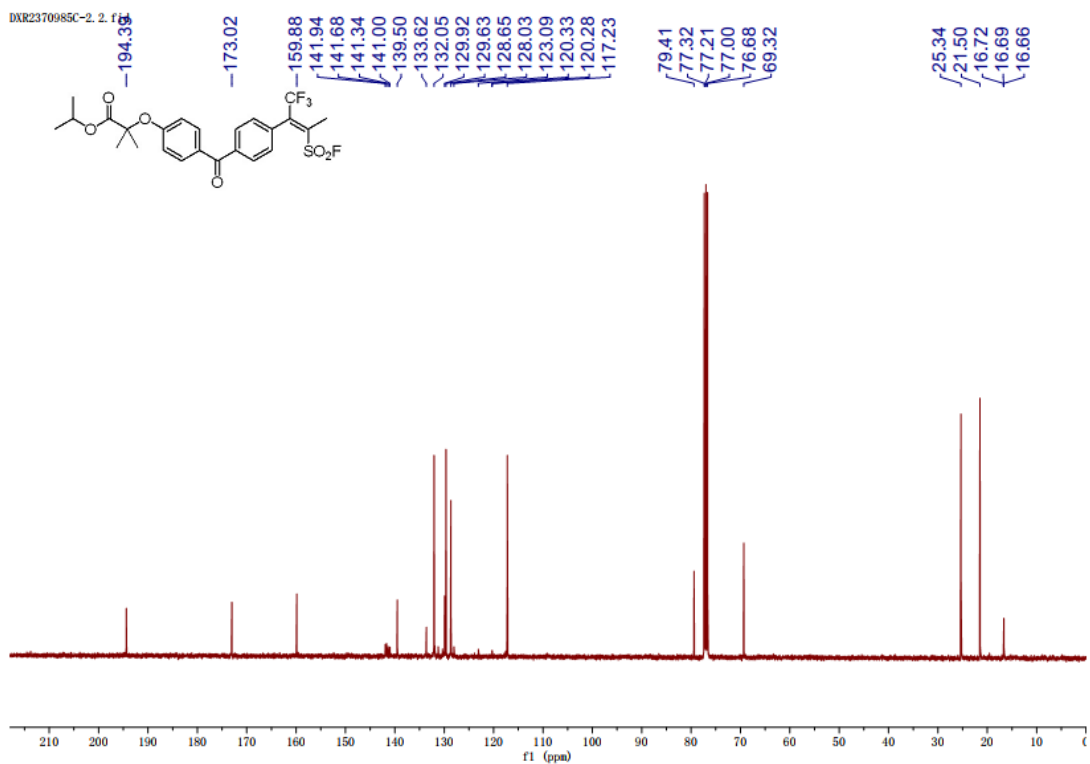

DIR2370985C-1.3.fid

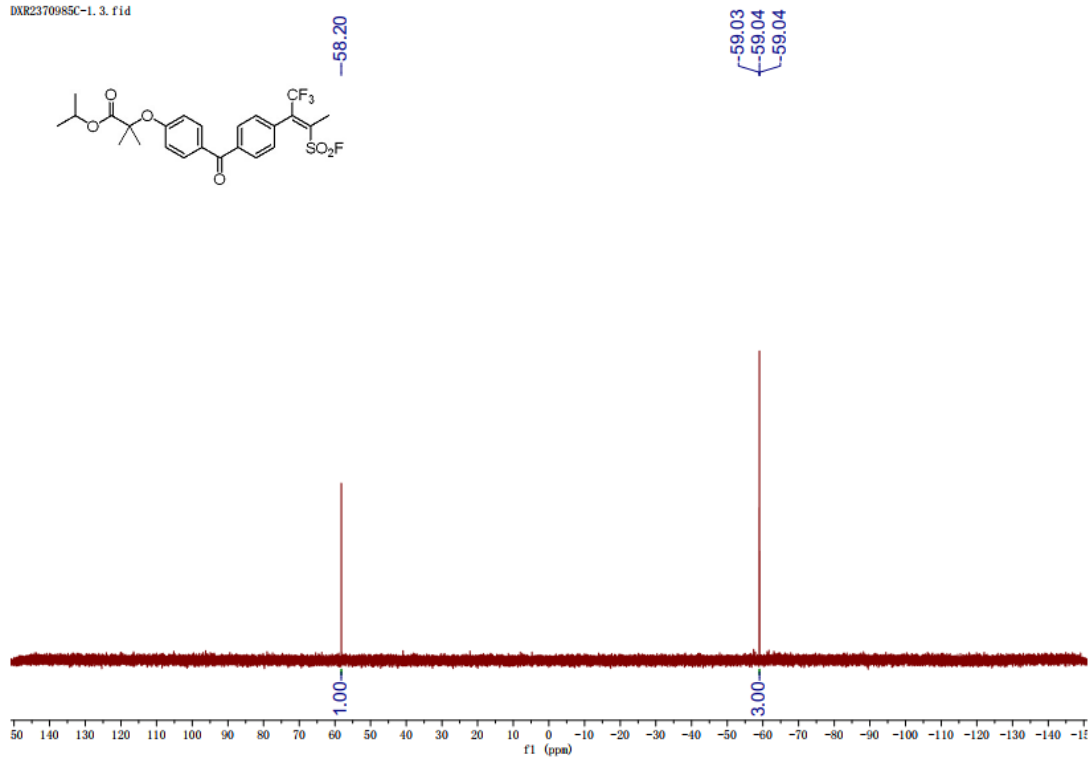

JWH5204035.1.fid

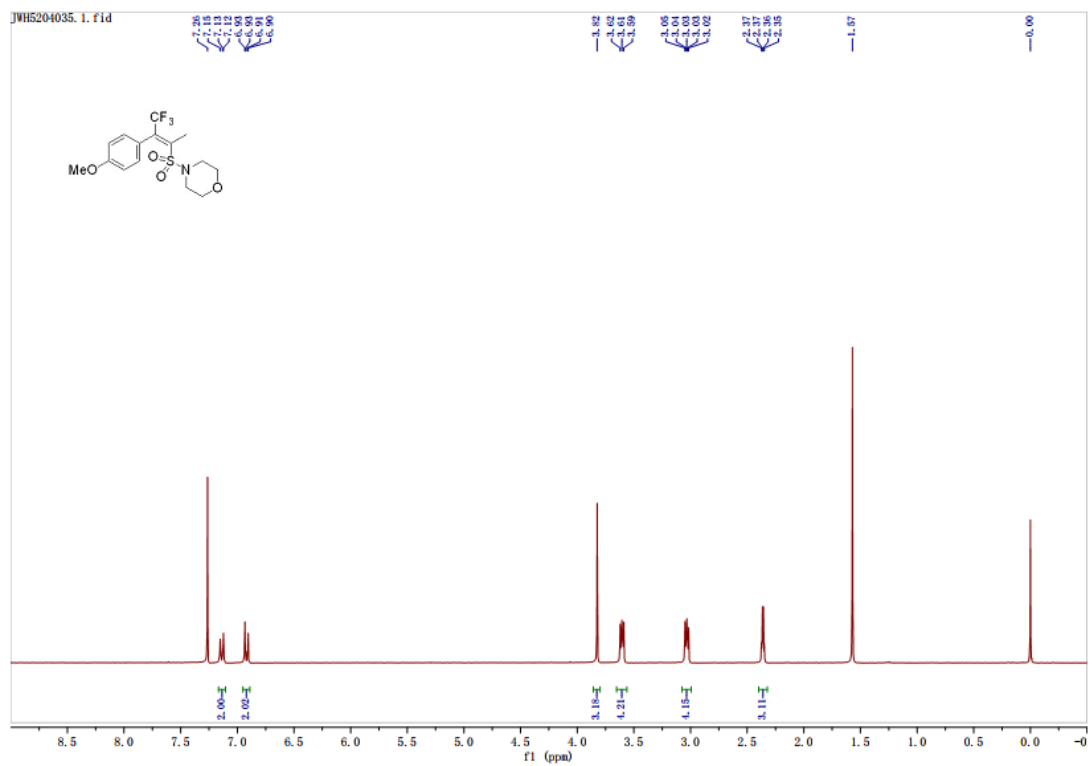

JWH5204035-02. 2. fid

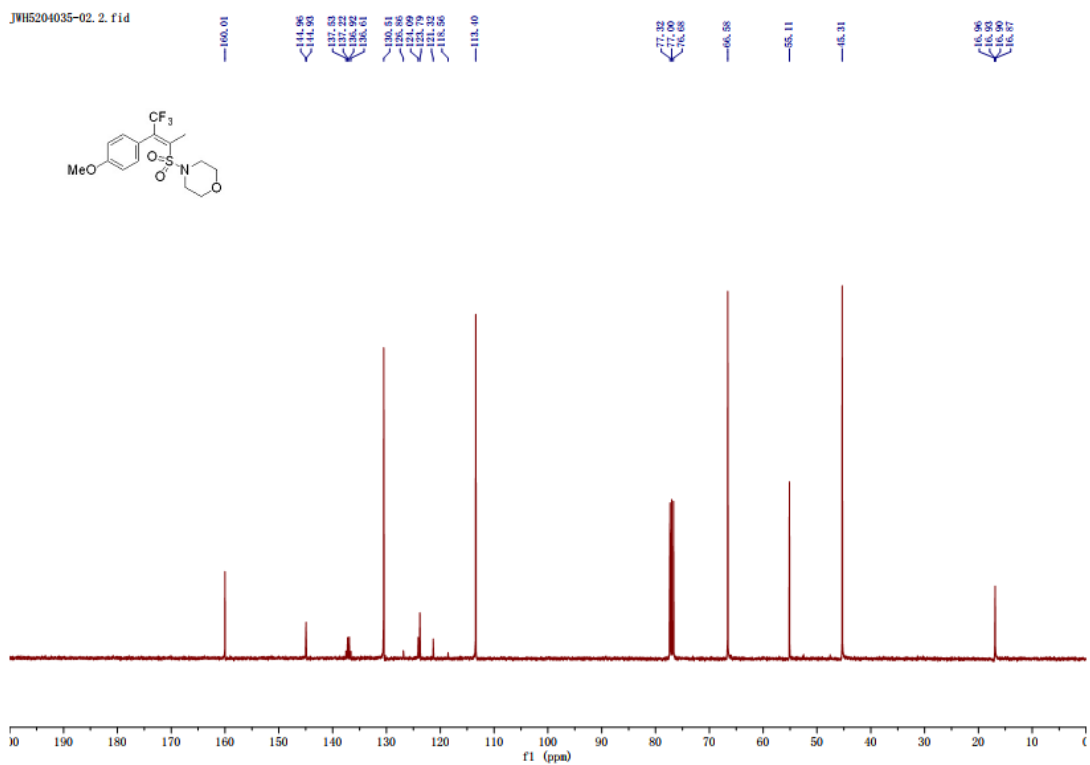

JWH5204035. 3. fid

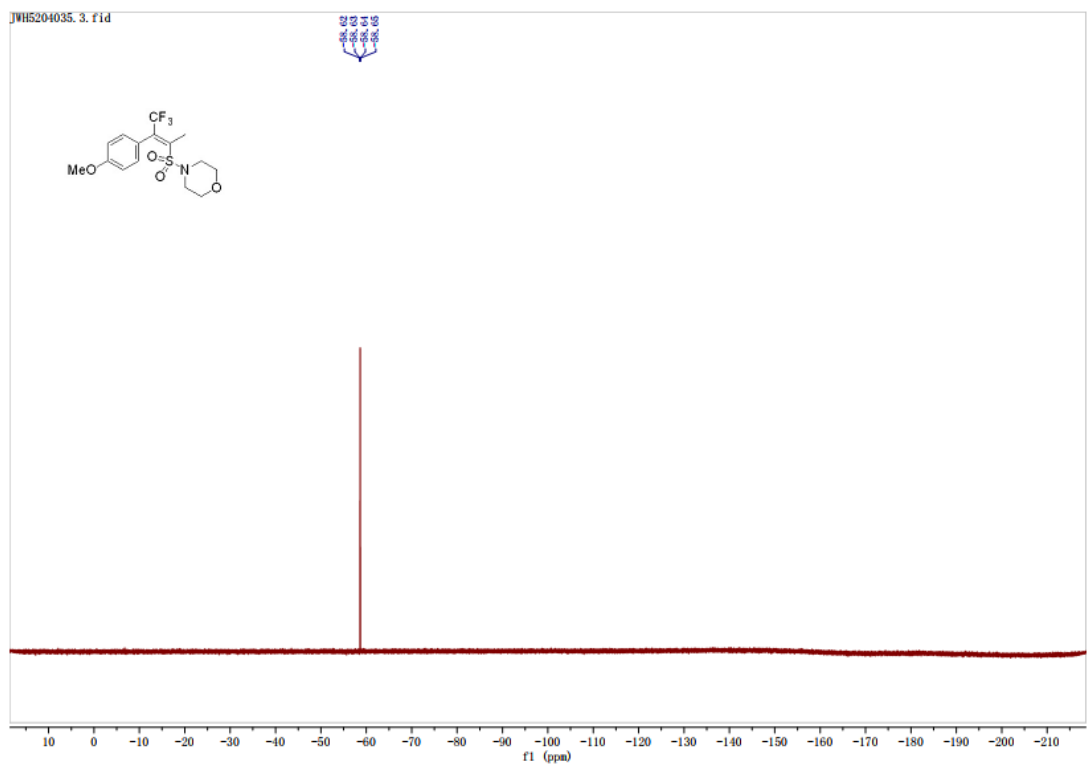

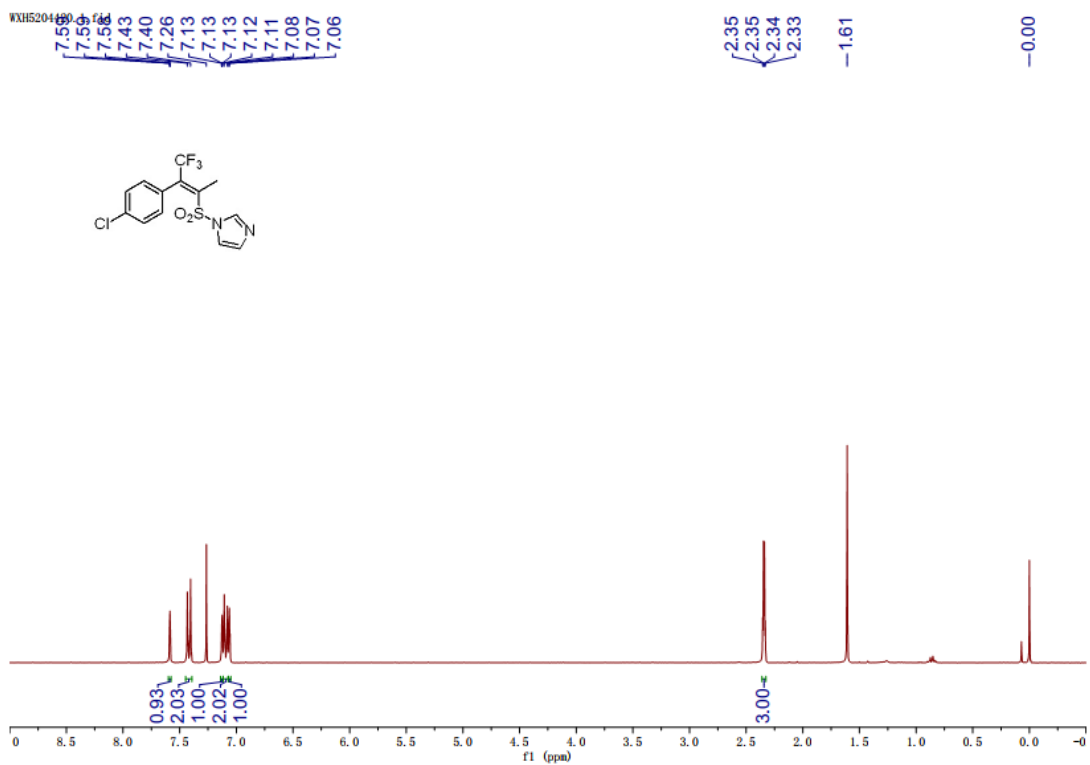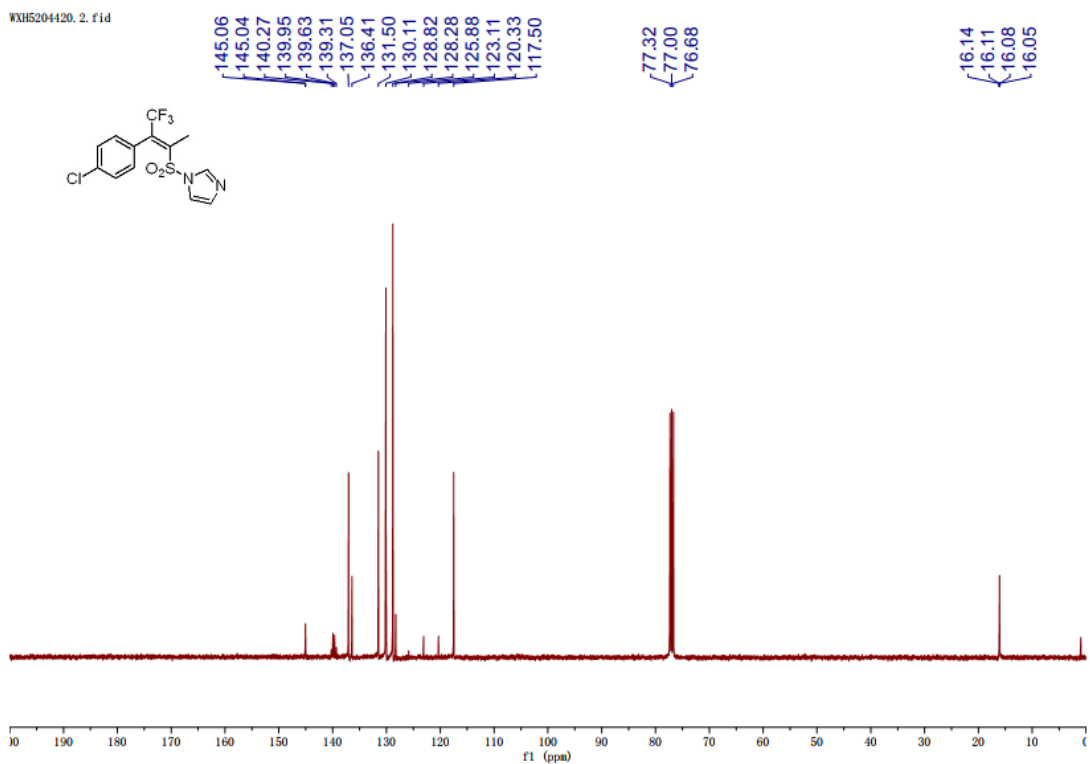

WXHS204420.3.fid

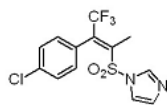

59.15  
59.16  
59.17  
59.17

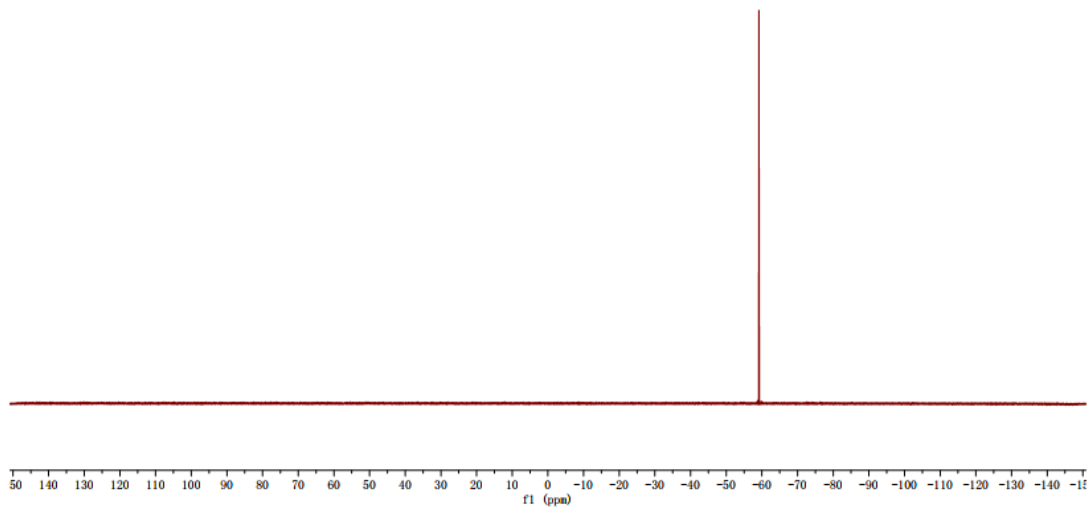

WXHS204419-C.1.fid

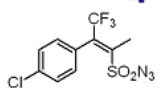

7.44  
7.43  
7.43  
7.42  
7.41  
7.40  
7.26  
7.20  
7.19  
7.18  
7.17

2.53  
2.52  
2.51  
2.50  
2.50

1.56

0.00

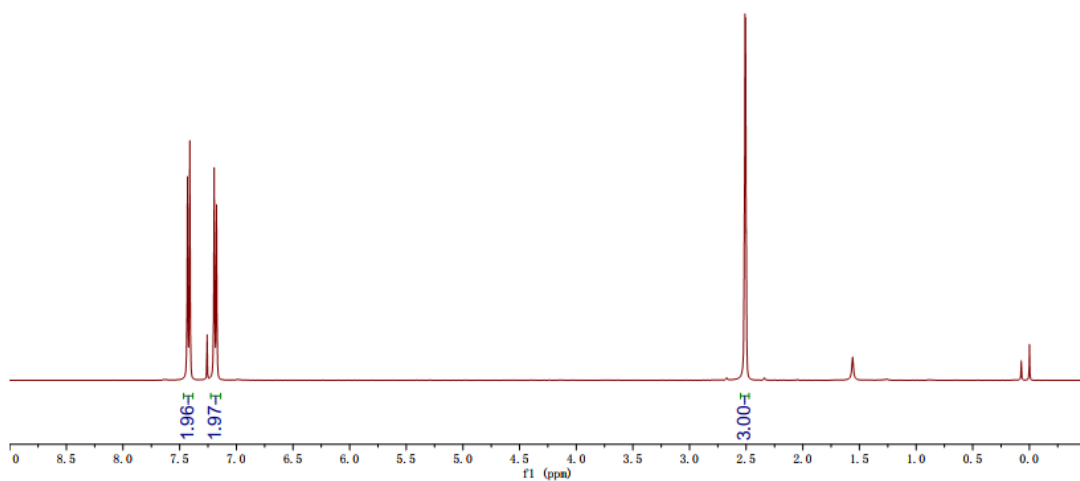



WXHS204419-C. 2. fid

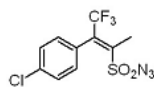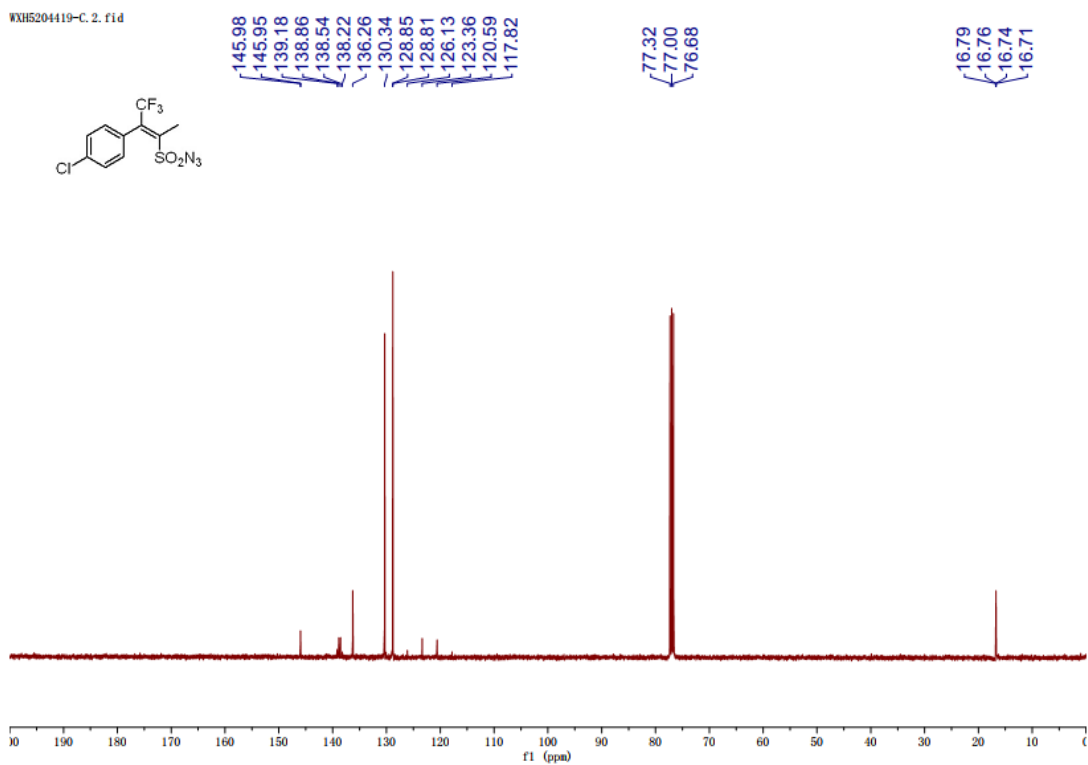

WXHS204419. 3. fid

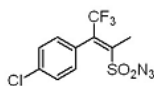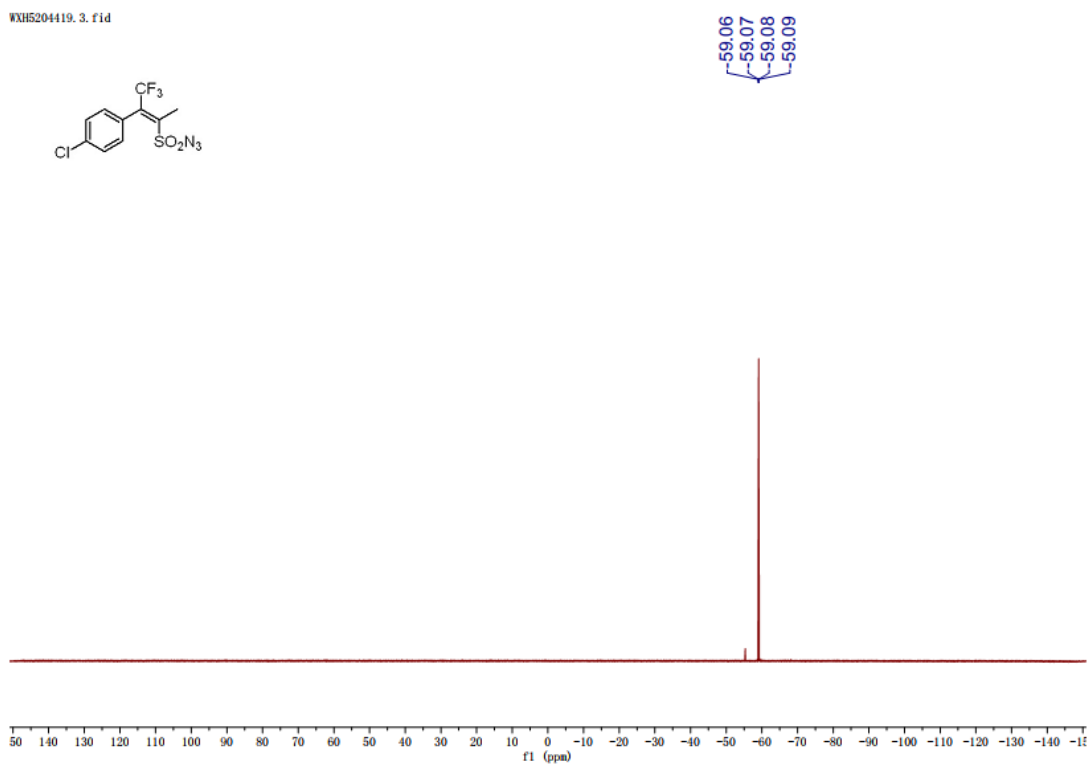

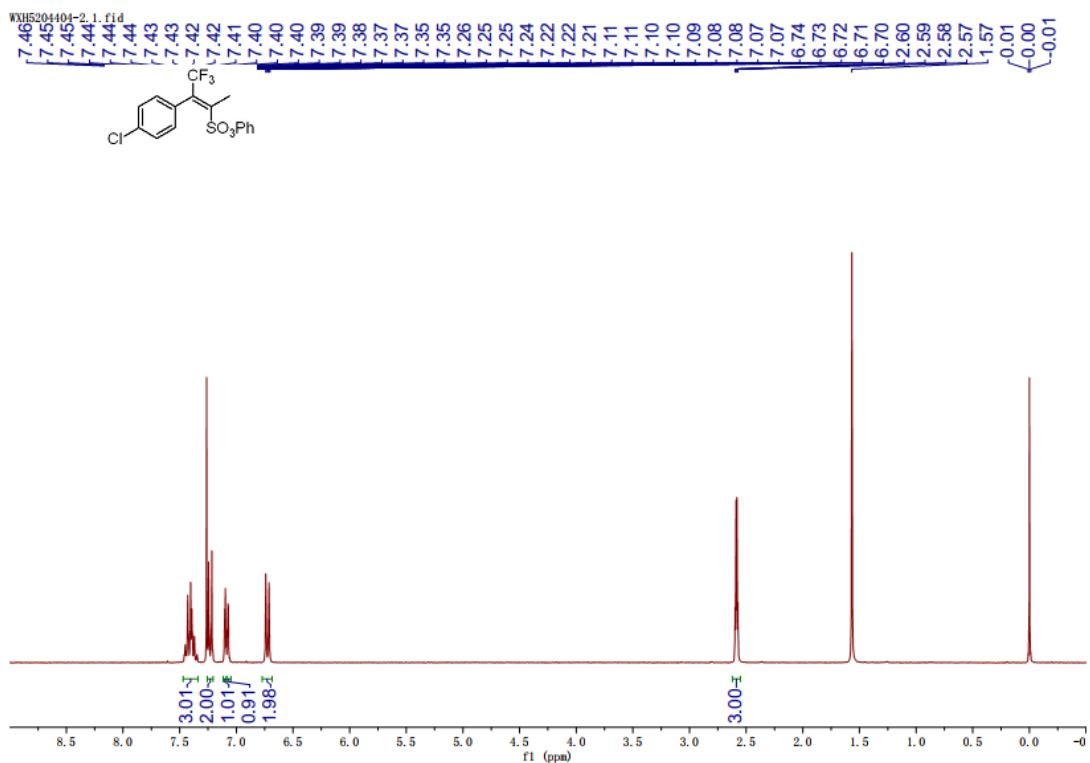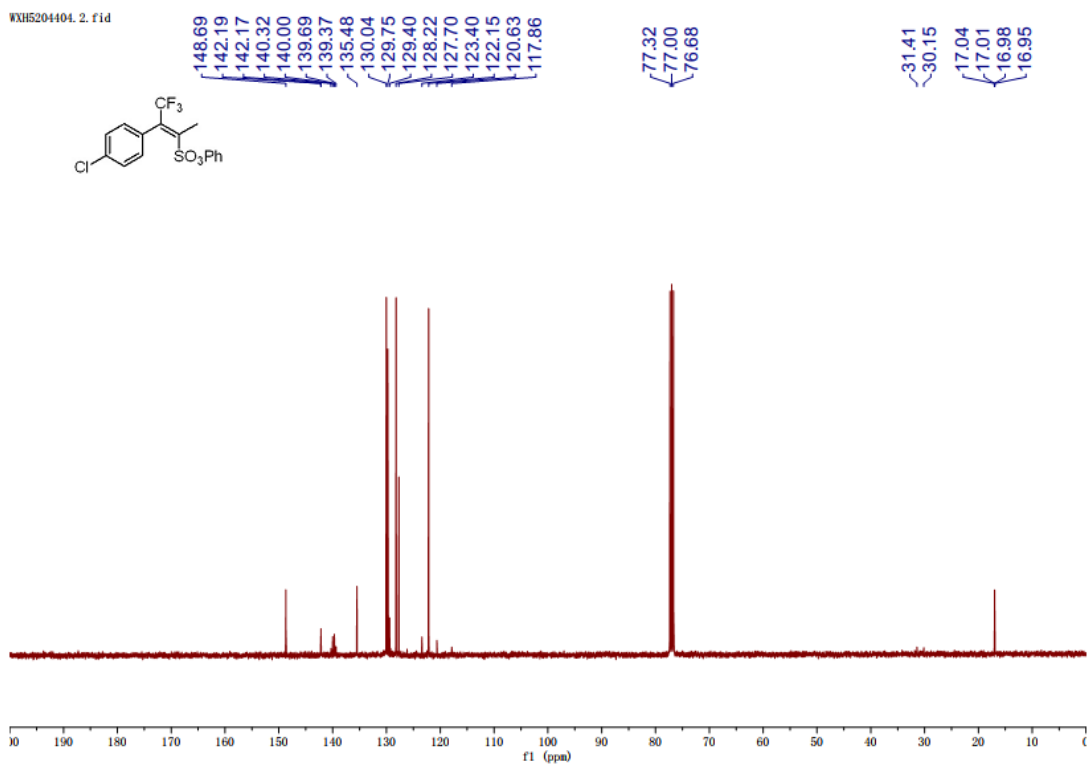

WXHS204404.3.fid

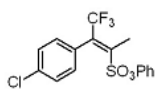

59.04  
59.05  
59.06  
59.07

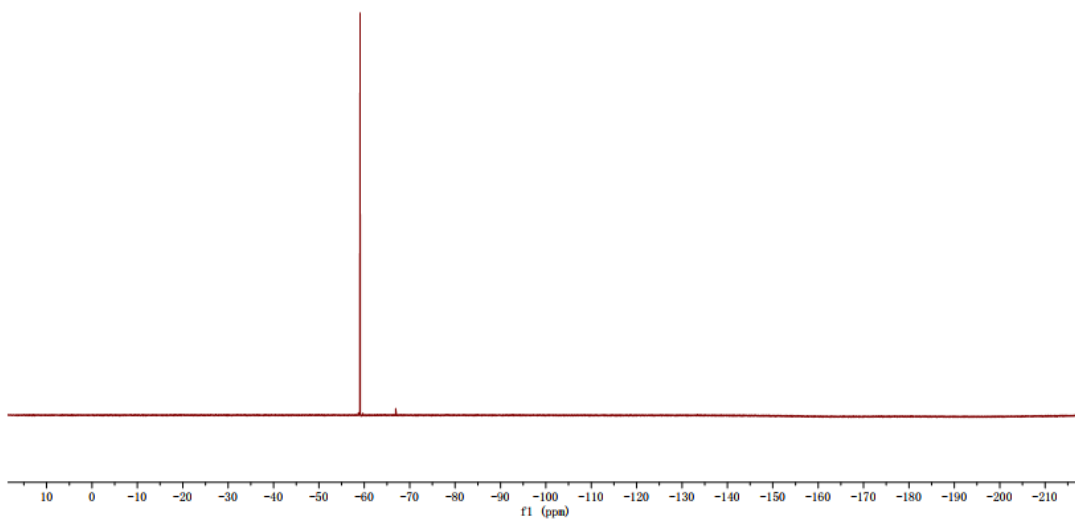

7.75  
7.73  
7.70  
7.68  
7.67  
7.64  
7.62  
7.61  
7.61  
7.49  
7.49  
7.48  
7.47  
7.47  
7.46  
7.44  
7.44  
7.41  
7.39  
7.26  
7.07  
7.07

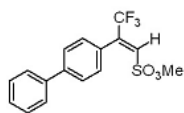

-3.79

-1.57

-0.07  
-0.00

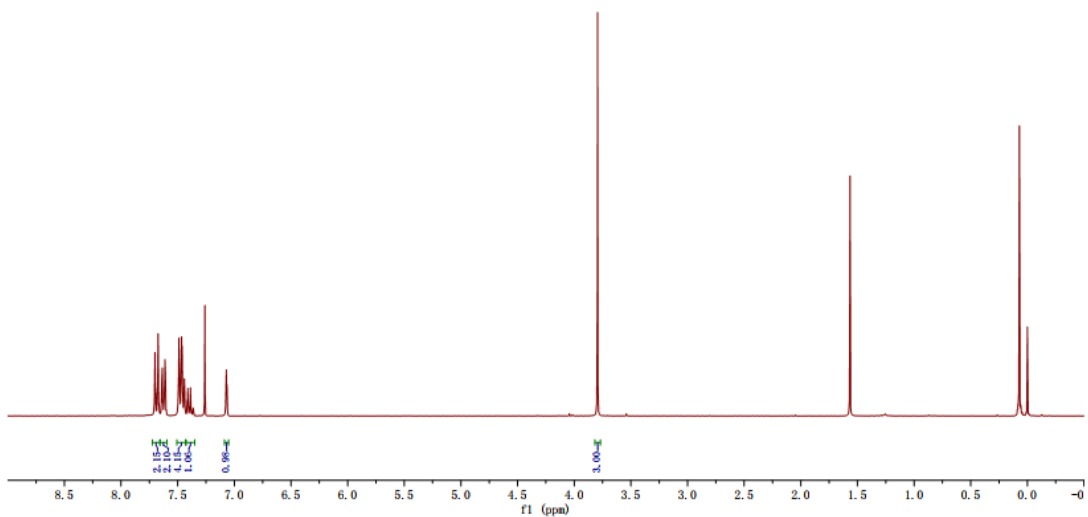

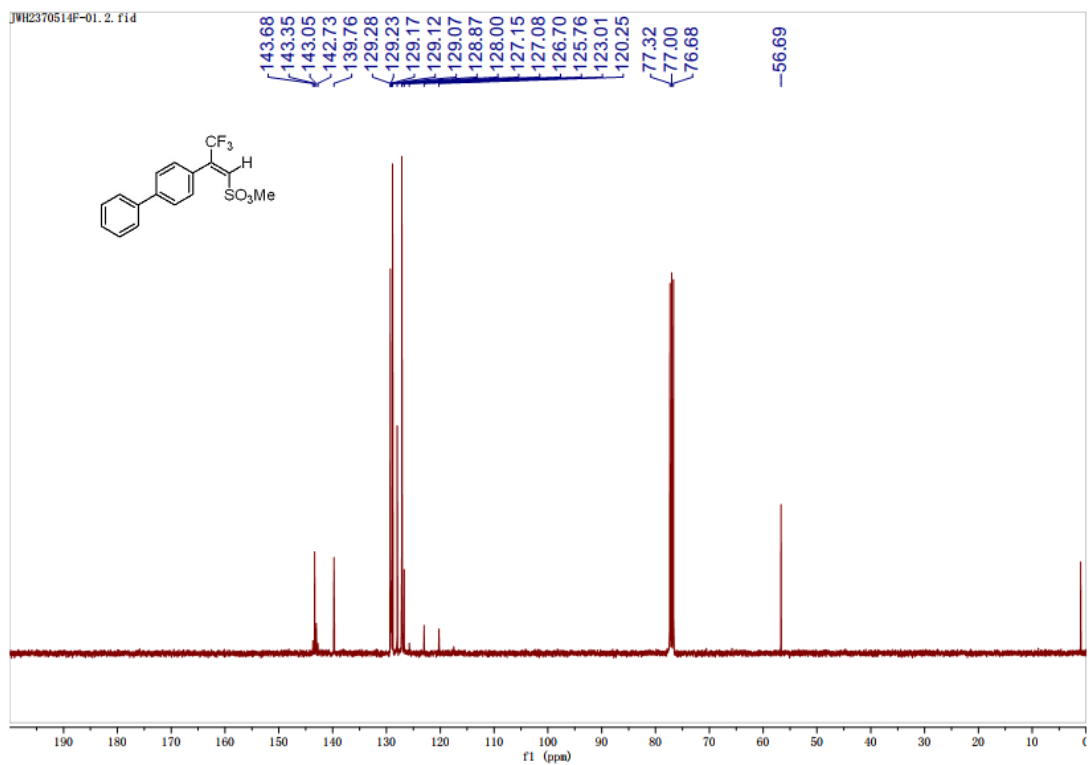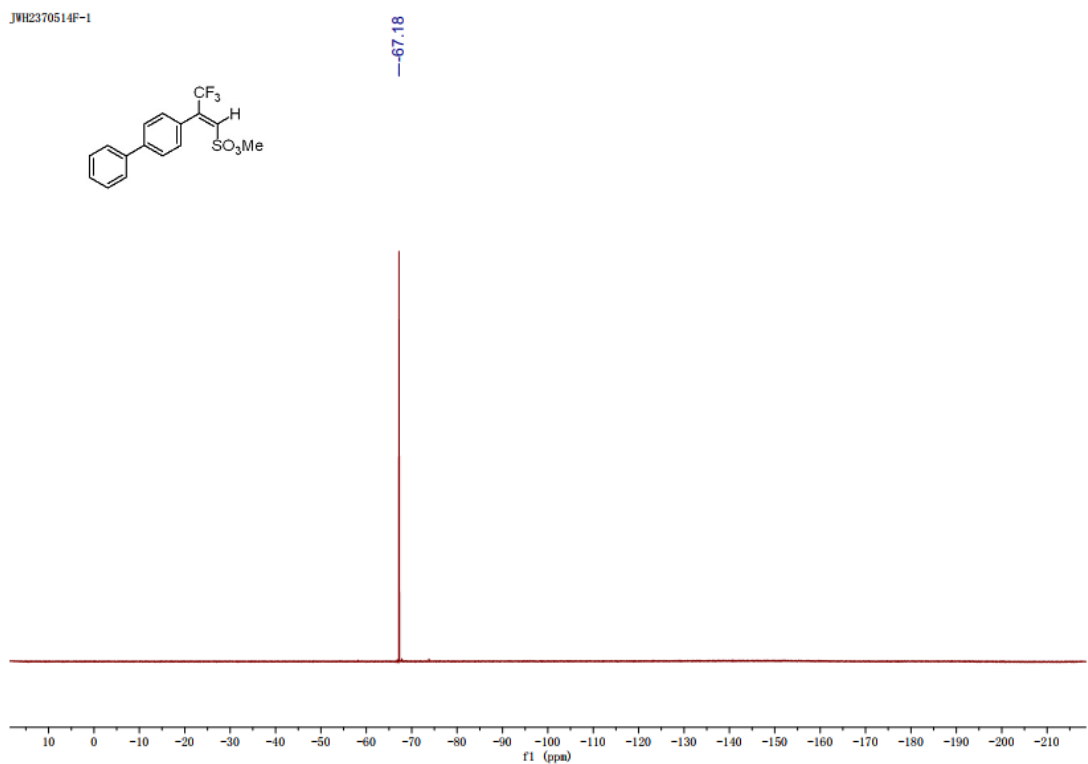



WXH2370607C-01. 3. f1d

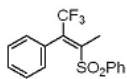

58.89  
58.90  
58.91  
58.92

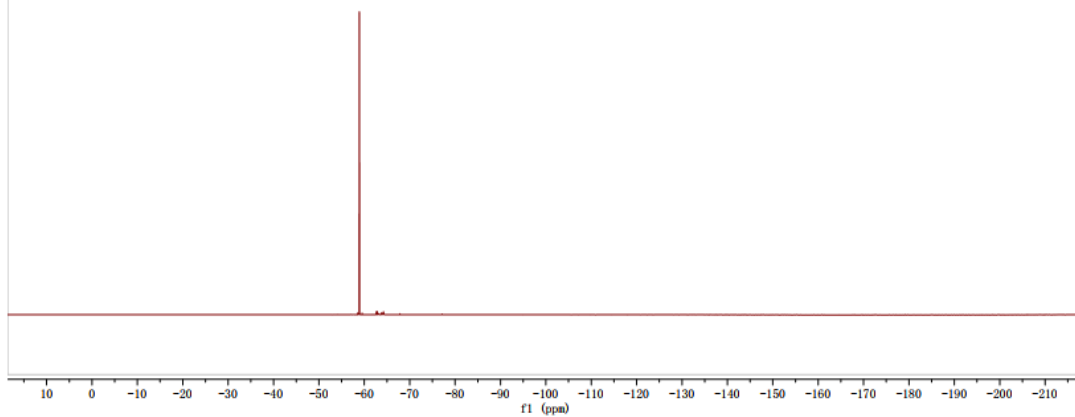

Supplement: d1sc03315h1.pdf [file d1sc03315h1.pdf]
